# Supplementary material
Source: MDPI journal article supplement (https://www.mdpi.com/2073-4441/12/3/651)
Supplement: s1 [file s1]

## Table S3: Number of species and sightings of freshwater reptiles and observations near cities in Freshwater Ecoregions of the World

The number of freshwater reptile species recorded in Global Biodiversity Information Facility (GBIF) between January 2013 and April 2018 from each of 265 Freshwater Ecoregions of the World (FEOW) regions. This is based on the species list in Table S1. GBIF contained no sightings of the species in that list from the FEOW regions not included here.

| Freshwater Ecoregion of The World | Records for the region |             | % of the Regions species |       |
|-----------------------------------|------------------------|-------------|--------------------------|-------|
|                                   | # Species              | # Sightings | 50 km                    | 10 km |
| Aceh                              | 1                      | 3           | 0                        | 0     |
| Aegean Drainages                  | 3                      | 4           | 67                       | 33    |
| Alaska & Canada Pacific Coastal   | 4                      | 124         | 100                      | 75    |
| Amatolo - Winterberg Highlands    | 1                      | 1           | 0                        | 0     |
| Amazonas Guiana Shield            | 1                      | 2           | 0                        | 0     |
| Amazonas High Andes               | 1                      | 1           | 0                        | 0     |
| Amazonas Lowlands                 | 19                     | 123         | 32                       | 5     |
| Ameca - Manantlan                 | 11                     | 108         | 36                       | 27    |
| Apalachicola                      | 22                     | 213         | 55                       | 14    |
| Appalachian Piedmont              | 26                     | 2088        | 58                       | 50    |
| Arabian Interior                  | 1                      | 1           | 0                        | 0     |
| Arafura - Carpentaria             | 23                     | 1388        | 48                       | 26    |
| Ashanti                           | 1                      | 3           | 0                        | 0     |
| Atlantic Northwest Africa         | 3                      | 18          | 67                       | 33    |
| Bahama Archipelago                | 1                      | 2           | 0                        | 0     |
| Baluchistan                       | 1                      | 6           | 0                        | 0     |
| Bangweulu - Mweru                 | 3                      | 3           | 0                        | 0     |
| Bass Strait Drainages             | 8                      | 150         | 100                      | 50    |
| Bight Drainages                   | 7                      | 64          | 100                      | 29    |
| Biwa Ko                           | 1                      | 1           | 0                        | 0     |
| Bonaerensean Drainages            | 1                      | 1           | 0                        | 0     |
| Bonneville                        | 1                      | 6           | 0                        | 0     |
| Borneo Highlands                  | 1                      | 1           | 0                        | 0     |
| Canary Islands                    | 2                      | 4           | 50                       | 50    |
| Cantabric Coast - Languedoc       | 10                     | 704         | 40                       | 30    |
| Cape Fold                         | 3                      | 65          | 100                      | 67    |
| Caspian Marine                    | 1                      | 2           | 0                        | 0     |
| Central & Eastern Java            | 4                      | 6           | 0                        | 0     |
| Central & Western Europe          | 13                     | 2754        | 85                       | 31    |
| Central Anatolia                  | 2                      | 2           | 0                        | 0     |
| Central Prairie                   | 17                     | 456         | 71                       | 6     |
| Chaco                             | 3                      | 6           | 0                        | 0     |
| Chagres                           | 6                      | 37          | 100                      | 0     |
| Chao Phraya                       | 12                     | 84          | 75                       | 50    |
| Chesapeake Bay                    | 19                     | 1679        | 74                       | 53    |
| Chiapas - Fonseca                 | 11                     | 78          | 82                       | 36    |

Table S3 Records from each FEOW region

| Freshwater Ecoregion of The World | Records for the region |             | % of the Regions species |       |
|-----------------------------------|------------------------|-------------|--------------------------|-------|
|                                   | # Species              | # Sightings | 50 km                    | 10 km |
| Chin Hills - Arakan Coast         | 3                      | 3           | 0                        | 0     |
| Chiriqui                          | 9                      | 97          | 11                       | 0     |
| Coastal East Africa               | 4                      | 56          | 25                       | 25    |
| Coastal Fujian - Zeijang          | 1                      | 1           | 100                      | 100   |
| Coastal Levant                    | 1                      | 2           | 100                      | 100   |
| Coatzacoalcos                     | 6                      | 213         | 33                       | 33    |
| Colorado                          | 6                      | 42          | 33                       | 0     |
| Columbia Glaciated                | 2                      | 37          | 50                       | 50    |
| Columbia Unglaciated              | 4                      | 49          | 100                      | 75    |
| Cuanza                            | 3                      | 5           | 67                       | 0     |
| Cuatro Cienegas                   | 1                      | 1           | 0                        | 0     |
| Cuba - Cayman Islands             | 2                      | 5           | 0                        | 0     |
| Cumberland                        | 9                      | 99          | 67                       | 33    |
| Dalmatia                          | 2                      | 10          | 50                       | 0     |
| Death Valley                      | 5                      | 19          | 60                       | 40    |
| Dnieper - South Bug               | 2                      | 3           | 0                        | 0     |
| Dniester - Lower Danube           | 3                      | 104         | 67                       | 67    |
| Don                               | 1                      | 1           | 0                        | 0     |
| Drakensberg - Maloti Highlands    | 1                      | 1           | 0                        | 0     |
| Dry Sahel                         | 1                      | 1           | 0                        | 0     |
| East Texas Gulf                   | 34                     | 4058        | 53                       | 29    |
| Eastern Borneo                    | 3                      | 3           | 67                       | 33    |
| Eastern Coastal Australia         | 19                     | 4067        | 63                       | 47    |
| Eastern Iberia                    | 13                     | 2688        | 85                       | 69    |
| Eastern Yellow Sea Drainages      | 7                      | 35          | 29                       | 0     |
| Eastern Zimbabwe Highlands        | 1                      | 4           | 100                      | 100   |
| English - Winnipeg Lakes          | 3                      | 102         | 100                      | 100   |
| Essequibo                         | 5                      | 10          | 0                        | 0     |
| Estero Real - Tempisque           | 7                      | 127         | 57                       | 43    |
| Ethiopian Highlands               | 1                      | 1           | 0                        | 0     |
| Etosha                            | 1                      | 3           | 0                        | 0     |
| Florida Peninsula                 | 30                     | 2831        | 73                       | 53    |
| Fluminense                        | 1                      | 1           | 100                      | 0     |
| Ganges Delta & Plain              | 13                     | 42          | 77                       | 31    |
| Ganges Himalayan Foothills        | 3                      | 20          | 67                       | 33    |
| Gila                              | 10                     | 400         | 50                       | 20    |
| Grijalva - Usumacinta             | 18                     | 764         | 67                       | 22    |
| Guianas                           | 7                      | 14          | 29                       | 14    |
| Gulf of Venice Drainages          | 8                      | 357         | 75                       | 13    |
| Guzman - Samalayuca               | 7                      | 39          | 14                       | 0     |
| Hainan                            | 1                      | 2           | 0                        | 0     |
| Hawaiian Islands                  | 2                      | 9           | 50                       | 50    |

Table S3 Records from each FEOW region

| Freshwater Ecoregion of The World    | Records for the region |             | % of the Regions species |       |
|--------------------------------------|------------------------|-------------|--------------------------|-------|
|                                      | # Species              | # Sightings | 50 km                    | 10 km |
| Hispaniola                           | 5                      | 15          | 60                       | 40    |
| Honshu - Shikoku - Kyushu            | 5                      | 37          | 80                       | 40    |
| Iguassu                              | 2                      | 4           | 100                      | 0     |
| Indian Ocean Slope of Sumatra & Java | 9                      | 20          | 22                       | 22    |
| Ionian Drainages                     | 1                      | 1           | 0                        | 0     |
| Isthmus Caribbean                    | 7                      | 16          | 0                        | 0     |
| Italian Peninsula & Islands          | 6                      | 97          | 50                       | 0     |
| Jamaica                              | 2                      | 5           | 0                        | 0     |
| Jordan River                         | 3                      | 48          | 67                       | 0     |
| Kafue                                | 3                      | 5           | 33                       | 0     |
| Kalahari                             | 1                      | 1           | 0                        | 0     |
| Kapuas                               | 2                      | 2           | 0                        | 0     |
| Karstveld Sink Holes                 | 2                      | 2           | 0                        | 0     |
| Kasai                                | 1                      | 1           | 0                        | 0     |
| Khorat Plateau (Mekong)              | 5                      | 8           | 0                        | 0     |
| Kimberley                            | 2                      | 9           | 0                        | 0     |
| Kura - South Caspian Drainages       | 4                      | 11          | 25                       | 0     |
| Laguna dos Patos                     | 2                      | 3           | 0                        | 0     |
| Lahontan                             | 3                      | 7           | 33                       | 33    |
| Lake Eyre Basin                      | 4                      | 5           | 0                        | 0     |
| Lake Malawi                          | 5                      | 30          | 0                        | 0     |
| Lake Rukwa                           | 2                      | 3           | 0                        | 0     |
| Lake Tana                            | 1                      | 1           | 0                        | 0     |
| Lake Tanganyika                      | 3                      | 4           | 33                       | 33    |
| Lake Turkana                         | 2                      | 3           | 0                        | 0     |
| Lake Van                             | 2                      | 7           | 50                       | 50    |
| Lake Victoria Basin                  | 5                      | 50          | 40                       | 0     |
| Laurentian Great Lakes               | 16                     | 2698        | 69                       | 56    |
| Lerma - Chapala                      | 10                     | 84          | 60                       | 40    |
| Lesser Sunda Islands                 | 3                      | 30          | 67                       | 33    |
| Llanos El Salado                     | 6                      | 11          | 50                       | 17    |
| Lower & Middle Indus                 | 2                      | 4           | 100                      | 100   |
| Lower & Middle Salween               | 5                      | 21          | 0                        | 0     |
| Lower Lancang (Mekong)               | 1                      | 2           | 0                        | 0     |
| Lower Mississippi                    | 33                     | 1320        | 45                       | 36    |
| Lower Niger - Benue                  | 2                      | 11          | 50                       | 0     |
| Lower Nile                           | 1                      | 1           | 100                      | 100   |
| Lower Parana                         | 9                      | 45          | 11                       | 11    |
| Lower Rio Grande - Bravo             | 14                     | 586         | 50                       | 29    |
| Lower Tigris & Euphrates             | 1                      | 1           | 100                      | 0     |
| Lower Uruguay                        | 3                      | 4           | 0                        | 0     |
| Lower Yangtze                        | 4                      | 11          | 50                       | 25    |

Table S3 Records from each FEOW region

| Freshwater Ecoregion of The World                  | Records for the region |             | % of the Regions species |       |
|----------------------------------------------------|------------------------|-------------|--------------------------|-------|
|                                                    | # Species              | # Sightings | 50 km                    | 10 km |
| Lower Zambezi                                      | 3                      | 5           | 100                      | 0     |
| Madagascar Eastern Lowlands                        | 2                      | 4           | 50                       | 0     |
| Mae Khlong                                         | 4                      | 13          | 50                       | 50    |
| Magdalena - Sinu                                   | 15                     | 228         | 87                       | 53    |
| Malay Peninsula Eastern Slope                      | 12                     | 210         | 75                       | 50    |
| Malukku                                            | 1                      | 1           | 0                        | 0     |
| Mamore - Madre de Dios Piedmont                    | 10                     | 51          | 0                        | 0     |
| Mar Chiquita - Salinas Grandes                     | 1                      | 1           | 0                        | 0     |
| Mariana Islands                                    | 1                      | 3           | 0                        | 0     |
| Mayran - Viesca                                    | 4                      | 9           | 25                       | 0     |
| Mediterranean Northwest Africa                     | 2                      | 2           | 0                        | 0     |
| Mekong Delta                                       | 3                      | 3           | 33                       | 33    |
| Middle Amu Darya                                   | 1                      | 1           | 0                        | 0     |
| Middle Missouri                                    | 12                     | 282         | 67                       | 42    |
| Middle Saskatchewan                                | 1                      | 4           | 100                      | 100   |
| Middle Yangtze                                     | 1                      | 1           | 100                      | 100   |
| Middle Zambezi - Luangwa                           | 3                      | 24          | 67                       | 67    |
| Mindanao                                           | 1                      | 1           | 100                      | 0     |
| Mobile Bay                                         | 27                     | 266         | 41                       | 22    |
| Mosquitia                                          | 3                      | 10          | 33                       | 0     |
| Murray - Darling                                   | 11                     | 2481        | 82                       | 64    |
| Namak                                              | 3                      | 10          | 100                      | 33    |
| Namib                                              | 3                      | 6           | 0                        | 0     |
| Namuda - Tapi                                      | 1                      | 3           | 100                      | 0     |
| New Guinea North Coast                             | 2                      | 3           | 0                        | 0     |
| New Zealand                                        | 2                      | 6           | 50                       | 50    |
| North Andean Pacific Slopes - Rio Atrato           | 14                     | 50          | 50                       | 7     |
| Northeast US & Southeast Canada Atlantic Drainages | 18                     | 2470        | 83                       | 56    |
| Northeastern Borneo                                | 7                      | 39          | 71                       | 14    |
| Northeastern Caatinga & Coastal Drainages          | 1                      | 2           | 100                      | 100   |
| Northeastern Mata Atlantica                        | 1                      | 1           | 100                      | 0     |
| Northern Anatolia                                  | 2                      | 2           | 0                        | 0     |
| Northern Baltic Drainages                          | 2                      | 26          | 50                       | 50    |
| Northern British Isles                             | 1                      | 11          | 100                      | 100   |
| Northern Central Asian Highlands                   | 1                      | 1           | 0                        | 0     |
| Northern Central Sumatra - Western Malaysia        | 7                      | 37          | 71                       | 43    |
| Northern Deccan Plateau                            | 2                      | 2           | 0                        | 0     |
| Northern Eastern Rift                              | 1                      | 6           | 0                        | 0     |
| Northern Gulf of Guinea Drainages - Bioko          | 1                      | 1           | 0                        | 0     |
| Northern Philippine Islands                        | 1                      | 2           | 0                        | 0     |
| Northern Upper Guinea                              | 3                      | 3           | 33                       | 33    |
| Northwestern Borneo                                | 9                      | 15          | 44                       | 0     |

Table S3 Records from each FEOW region

| Freshwater Ecoregion of The World     | Records for the region |             | % of the Regions species |       |
|---------------------------------------|------------------------|-------------|--------------------------|-------|
|                                       | # Species              | # Sightings | 50 km                    | 10 km |
| Northwestern Madagascar               | 2                      | 4           | 0                        | 0     |
| Ogasarawa Islands - Kazan Archipelago | 3                      | 3           | 0                        | 0     |
| Ogooue - Nyanga - Kouilou - Niari     | 1                      | 2           | 0                        | 0     |
| Okavango                              | 4                      | 22          | 0                        | 0     |
| Oregon & Northern California Coastal  | 7                      | 474         | 86                       | 71    |
| Orinoco Guiana Shield                 | 1                      | 1           | 0                        | 0     |
| Orinoco High Andes                    | 2                      | 13          | 0                        | 0     |
| Orinoco Llanos                        | 15                     | 330         | 0                        | 0     |
| Orinoco Piedmont                      | 10                     | 20          | 60                       | 40    |
| Ouachita Highlands                    | 23                     | 578         | 57                       | 9     |
| Ozark Highlands                       | 24                     | 291         | 50                       | 8     |
| Paleo                                 | 4                      | 5           | 0                        | 0     |
| Pangani                               | 1                      | 1           | 0                        | 0     |
| Panuco                                | 12                     | 183         | 58                       | 25    |
| Papaloapan                            | 13                     | 116         | 77                       | 54    |
| Paraguay                              | 8                      | 67          | 0                        | 0     |
| Pecos                                 | 9                      | 184         | 0                        | 0     |
| Pilbara                               | 1                      | 1           | 0                        | 0     |
| Placemark                             | 3                      | 3           | 33                       | 0     |
| Puerto Rico - Virgin Islands          | 2                      | 14          | 100                      | 50    |
| Quintana Roo - Motagua                | 16                     | 169         | 50                       | 31    |
| Ribeira de Iguape                     | 1                      | 1           | 0                        | 0     |
| Rio Balsas                            | 10                     | 36          | 50                       | 30    |
| Rio Conchos                           | 2                      | 4           | 0                        | 0     |
| Rio Negro                             | 1                      | 5           | 100                      | 100   |
| Rio Salado                            | 10                     | 72          | 10                       | 0     |
| Rio San Juan (Mexico)                 | 8                      | 66          | 63                       | 50    |
| Rio Santiago                          | 13                     | 95          | 69                       | 38    |
| Rio Tuira                             | 5                      | 18          | 100                      | 80    |
| Sabine - Galveston                    | 29                     | 5120        | 69                       | 52    |
| Sacramento - San Joaquin              | 10                     | 809         | 50                       | 40    |
| Sahara                                | 1                      | 1           | 0                        | 0     |
| San Juan (Nicaragua/Costa Rica)       | 17                     | 327         | 47                       | 6     |
| Sangha                                | 1                      | 1           | 0                        | 0     |
| Santa Maria                           | 2                      | 7           | 0                        | 0     |
| Scotia - Fundy                        | 5                      | 54          | 40                       | 40    |
| Senegal - Gambia                      | 4                      | 32          | 75                       | 75    |
| Sierra Madre del Sur                  | 12                     | 87          | 25                       | 17    |
| Sinaloa                               | 11                     | 95          | 73                       | 55    |
| Solomon Islands                       | 2                      | 2           | 0                        | 0     |
| Song Hong                             | 1                      | 1           | 100                      | 0     |
| Sonora                                | 9                      | 48          | 44                       | 11    |

Table S3 Records from each FEOW region

| Freshwater Ecoregion of The World             | Records for the region |             | % of the Regions species |       |
|-----------------------------------------------|------------------------|-------------|--------------------------|-------|
|                                               | # Species              | # Sightings | 50 km                    | 10 km |
| South America Caribbean Drainages - Trinidad  | 6                      | 44          | 50                       | 0     |
| Southeast Adriatic Drainages                  | 2                      | 6           | 0                        | 0     |
| Southeastern Borneo                           | 6                      | 10          | 17                       | 0     |
| Southeastern Ghats                            | 3                      | 5           | 67                       | 0     |
| Southeastern Korean Peninsula                 | 4                      | 12          | 0                        | 0     |
| Southeastern Mata Atlantica                   | 2                      | 2           | 50                       | 50    |
| Southern Anatolia                             | 2                      | 4           | 0                        | 0     |
| Southern Annam                                | 2                      | 3           | 50                       | 0     |
| Southern California Coastal - Baja California | 12                     | 964         | 75                       | 58    |
| Southern Central Sumatra                      | 3                      | 4           | 33                       | 0     |
| Southern Eastern Rift                         | 4                      | 11          | 0                        | 0     |
| Southern Gulf of Guinea Drainages             | 4                      | 4           | 25                       | 25    |
| Southern Hudson Bay                           | 1                      | 1           | 0                        | 0     |
| Southern Iberia                               | 8                      | 1314        | 88                       | 88    |
| Southern Kalahari                             | 2                      | 5           | 50                       | 0     |
| Southern Sumatra - Western Java               | 8                      | 18          | 50                       | 38    |
| Southern Tasmania                             | 2                      | 16          | 100                      | 0     |
| Southern Temperate Highveld                   | 5                      | 141         | 100                      | 20    |
| Southwest New Guinea - Trans-Fly Lowland      | 1                      | 1           | 0                        | 0     |
| Southwestern Arabian Coast                    | 1                      | 2           | 0                        | 0     |
| Southwestern Australia                        | 6                      | 170         | 100                      | 67    |
| Sri Lanka Dry Zone                            | 5                      | 47          | 20                       | 0     |
| Sri Lanka Wet Zone                            | 3                      | 26          | 67                       | 33    |
| St.Lawrence                                   | 10                     | 1244        | 50                       | 40    |
| Sulawesi                                      | 2                      | 3           | 50                       | 0     |
| Tana, Athi & Coastal Drainages                | 5                      | 20          | 100                      | 80    |
| Tapajos - Juruena                             | 3                      | 6           | 0                        | 0     |
| Teays - Old Ohio                              | 17                     | 838         | 47                       | 35    |
| Tennessee                                     | 17                     | 393         | 59                       | 18    |
| Thrace                                        | 3                      | 27          | 33                       | 0     |
| Turan Plain                                   | 1                      | 2           | 100                      | 0     |
| Uele                                          | 3                      | 8           | 0                        | 0     |
| Unassigned                                    | 7                      | 19          | 29                       | 14    |
| Upper Danube                                  | 5                      | 41          | 60                       | 20    |
| Upper Mississippi                             | 20                     | 639         | 60                       | 35    |
| Upper Missouri                                | 2                      | 13          | 0                        | 0     |
| Upper Nile                                    | 2                      | 3           | 50                       | 50    |
| Upper Parana                                  | 3                      | 15          | 100                      | 100   |
| Upper Rio Grande - Bravo                      | 8                      | 93          | 63                       | 63    |
| Upper Snake                                   | 1                      | 1           | 0                        | 0     |
| Upper Tigris & Euphrates                      | 3                      | 3           | 0                        | 0     |
| Upper Usumacinta                              | 13                     | 145         | 0                        | 0     |

Table S3 Records from each FEOW region

| Freshwater Ecoregion of The World | Records for the region |             | % of the Regions species |       |
|-----------------------------------|------------------------|-------------|--------------------------|-------|
|                                   | # Species              | # Sightings | 50 km                    | 10 km |
| Upper Zambezi Floodplains         | 2                      | 24          | 0                        | 0     |
| US Southern Plains                | 20                     | 703         | 55                       | 45    |
| Vegas - Virgin                    | 2                      | 50          | 100                      | 100   |
| Vogelkop - Bomberai               | 1                      | 1           | 0                        | 0     |
| Volta                             | 7                      | 88          | 0                        | 0     |
| West Florida Gulf                 | 15                     | 104         | 7                        | 0     |
| West Texas Gulf                   | 16                     | 1301        | 50                       | 6     |
| Western Amazon Piedmont           | 4                      | 8           | 0                        | 0     |
| Western Anatolia                  | 5                      | 35          | 0                        | 0     |
| Western Ghats                     | 4                      | 7           | 25                       | 25    |
| Western Iberia                    | 6                      | 607         | 67                       | 50    |
| Western Madagascar                | 2                      | 2           | 0                        | 0     |
| Western Taiwan                    | 2                      | 17          | 100                      | 100   |
| Windward & Leeward Islands        | 1                      | 1           | 0                        | 0     |
| Xi Yiang                          | 15                     | 59          | 67                       | 27    |
| Yucatan                           | 15                     | 377         | 73                       | 47    |
| Zambeian Headwaters               | 1                      | 1           | 0                        | 0     |
| Zambeian Highveld                 | 3                      | 11          | 33                       | 33    |
| Zambeian Lowveld                  | 10                     | 336         | 60                       | 10    |
