# Supplementary material
Source: MDPI journal article supplement (https://www.mdpi.com/2073-4441/12/3/651)
Supplement: s1 [file s1]

## Table S1. Global list of Freshwater Reptile Species

Freshwater reptile species from the for Freshwater Animal Diversity Assessment (FADA) database. The latest revision of the list of freshwater turtle species was completed by the IUCN/SSC Tortoise and Freshwater Turtle Specialist Group and the latest revision list of Squamata in freshwater was completed by Andrew Durso. Both these lists were provided by Aaike De Wever in his capacity of Data Manager (FADA). The Squamata list included some species that were attributed to mangroves or estuaries. Available information on the habitats of these species was examined and the species were removed from the list if there was no information showing that they inhabited freshwater environments.

| Suborder   | Family           | Scientific name                   | How aquatic? |
|------------|------------------|-----------------------------------|--------------|
| Crocodylia | Alligatoridae    | <i>Alligator mississippiensis</i> | Semi-aquatic |
| Crocodylia | Alligatoridae    | <i>Alligator sinensis</i>         | Semi-aquatic |
| Crocodylia | Crocodylidae     | <i>Caiman crocodilus</i>          | Semi-aquatic |
| Crocodylia | Crocodylidae     | <i>Caiman latirostris</i>         | Semi-aquatic |
| Crocodylia | Crocodylidae     | <i>Melanosuchus niger</i>         | Semi-aquatic |
| Crocodylia | Crocodylidae     | <i>Palaeosuchus palpebrosus</i>   | Semi-aquatic |
| Crocodylia | Crocodylidae     | <i>Palaeosuchus trigonatus</i>    | Semi-aquatic |
| Crocodylia | Crocodylidae     | <i>Crocodylus acutus</i>          | Semi-aquatic |
| Crocodylia | Crocodylidae     | <i>Crocodylus cataphractus</i>    | Semi-aquatic |
| Crocodylia | Crocodylidae     | <i>Crocodylus intermedius</i>     | Semi-aquatic |
| Crocodylia | Crocodylidae     | <i>Crocodylus johnsoni</i>        | Semi-aquatic |
| Crocodylia | Crocodylidae     | <i>Crocodylus mindorensis</i>     | Semi-aquatic |
| Crocodylia | Crocodylidae     | <i>Crocodylus moreletii</i>       | Semi-aquatic |
| Crocodylia | Crocodylidae     | <i>Crocodylus noveaguineae</i>    | Semi-aquatic |
| Crocodylia | Crocodylidae     | <i>Crocodylus niloticus</i>       | Semi-aquatic |
| Crocodylia | Crocodylidae     | <i>Crocodylus palustris</i>       | Semi-aquatic |
| Crocodylia | Crocodylidae     | <i>Crocodylus porosus</i>         | Semi-aquatic |
| Crocodylia | Crocodylidae     | <i>Crocodylus raninus</i>         | Semi-aquatic |
| Crocodylia | Crocodylidae     | <i>Crocodylus rhombifer</i>       | Semi-aquatic |
| Crocodylia | Crocodylidae     | <i>Crocodylus siamensis</i>       | Semi-aquatic |
| Crocodylia | Crocodylidae     | <i>Osteolemus tetraspis</i>       | Semi-aquatic |
| Crocodylia | Galvalidae       | <i>Gavialis gangeticus</i>        | Semi-aquatic |
| Crocodylia | Galvalidae       | <i>Tomistoma schlegelii</i>       | Semi-aquatic |
| Lacertilia | Agamidae         | <i>Hydrosaurus amboinensis</i>    | Semiaquatic  |
| Lacertilia | Agamidae         | <i>Hydrosaurus pustulatus</i>     | Semiaquatic  |
| Lacertilia | Agamidae         | <i>Hydrosaurus weberi</i>         | Semiaquatic  |
| Lacertilia | Agamidae         | <i>Intellagama lesueurii</i>      | Semiaquatic  |
| Lacertilia | Agamidae         | <i>Lophognathus temporalis</i>    | Semiaquatic  |
| Lacertilia | Agamidae         | <i>Physignathus cocincinus</i>    | Semiaquatic  |
| Lacertilia | Corytophanidae   | <i>Basiliscus basiliscus</i>      | Semiaquatic  |
| Lacertilia | Corytophanidae   | <i>Basiliscus galeritus</i>       | Semiaquatic  |
| Lacertilia | Corytophanidae   | <i>Basiliscus plumifrons</i>      | Semiaquatic  |
| Lacertilia | Corytophanidae   | <i>Basiliscus vittatus</i>        | Semiaquatic  |
| Lacertilia | Gerrhosauridae   | <i>Zonosaurus maximus</i>         | Semiaquatic  |
| Lacertilia | Gymnophthalmidae | <i>Echinosaura sulcarostrum</i>   | Semiaquatic  |
| Lacertilia | Gymnophthalmidae | <i>Neusticurus bicarinatus</i>    | Semiaquatic  |

Table S1 Global list of Freshwater Reptile Species

| Suborder   | Family           | Scientific name                    | How aquatic? |
|------------|------------------|------------------------------------|--------------|
| Lacertilia | Gymnophthalmidae | <i>Neusticurus medemi</i>          | Semiaquatic  |
| Lacertilia | Gymnophthalmidae | <i>Neusticurus racenisi</i>        | Semiaquatic  |
| Lacertilia | Gymnophthalmidae | <i>Neusticurus rudis</i>           | Semiaquatic  |
| Lacertilia | Gymnophthalmidae | <i>Neusticurus tatei</i>           | Semiaquatic  |
| Lacertilia | Gymnophthalmidae | <i>Potamites apodemus</i>          | Semiaquatic  |
| Lacertilia | Gymnophthalmidae | <i>Potamites cochranæ</i>          | Semiaquatic  |
| Lacertilia | Gymnophthalmidae | <i>Potamites ecleopus</i>          | Semiaquatic  |
| Lacertilia | Gymnophthalmidae | <i>Potamites erythrocularis</i>    | Semiaquatic  |
| Lacertilia | Gymnophthalmidae | <i>Potamites flavogularis</i>      | Semiaquatic  |
| Lacertilia | Gymnophthalmidae | <i>Potamites juruaensis</i>        | Semiaquatic  |
| Lacertilia | Gymnophthalmidae | <i>Potamites montanicola</i>       | Semiaquatic  |
| Lacertilia | Gymnophthalmidae | <i>Potamites ocellatus</i>         | Semiaquatic  |
| Lacertilia | Gymnophthalmidae | <i>Potamites strangulatus</i>      | Semiaquatic  |
| Lacertilia | Lanthanotidae    | <i>Lanthanotus borneensis</i>      | Semiaquatic  |
| Lacertilia | Polychrotidae    | <i>Anolis aquaticus</i>            | Semiaquatic  |
| Lacertilia | Polychrotidae    | <i>Anolis barkeri</i>              | Semiaquatic  |
| Lacertilia | Polychrotidae    | <i>Anolis eugenegrahami</i>        | Semiaquatic  |
| Lacertilia | Polychrotidae    | <i>Anolis lionotus</i>             | Semiaquatic  |
| Lacertilia | Polychrotidae    | <i>Anolis lynchi</i>               | Semiaquatic  |
| Lacertilia | Polychrotidae    | <i>Anolis macrolepis</i>           | Semiaquatic  |
| Lacertilia | Polychrotidae    | <i>Anolis maculigula</i>           | Semiaquatic  |
| Lacertilia | Polychrotidae    | <i>Anolis oxylophus</i>            | Semiaquatic  |
| Lacertilia | Polychrotidae    | <i>Anolis poecilopus</i>           | Semiaquatic  |
| Lacertilia | Polychrotidae    | <i>Anolis rivalis</i>              | Semiaquatic  |
| Lacertilia | Polychrotidae    | <i>Anolis vermiculatus</i>         | Semiaquatic  |
| Lacertilia | Scincidae        | <i>Amphiglossus astrolabi</i>      | Semiaquatic  |
| Lacertilia | Scincidae        | <i>Amphiglossus reticulatus</i>    | Semiaquatic  |
| Lacertilia | Scincidae        | <i>Cophoscincopus durus</i>        | Semiaquatic  |
| Lacertilia | Scincidae        | <i>Cophoscincopus greeri</i>       | Semiaquatic  |
| Lacertilia | Scincidae        | <i>Cophoscincopus senegalensis</i> | Semiaquatic  |
| Lacertilia | Scincidae        | <i>Cophoscincopus simulans</i>     | Semiaquatic  |
| Lacertilia | Scincidae        | <i>Eulamprus heatwolei</i>         | Semiaquatic  |
| Lacertilia | Scincidae        | <i>Eulamprus kosciuskoi</i>        | Semiaquatic  |
| Lacertilia | Scincidae        | <i>Eulamprus leuraensis</i>        | Semiaquatic  |
| Lacertilia | Scincidae        | <i>Eulamprus quoyii</i>            | Semiaquatic  |
| Lacertilia | Scincidae        | <i>Eulamprus tympanum</i>          | Semiaquatic  |
| Lacertilia | Scincidae        | <i>Lioscincus steindachneri</i>    | Semiaquatic  |
| Lacertilia | Scincidae        | <i>Parvooscincus duwendorum</i>    | Semiaquatic  |
| Lacertilia | Scincidae        | <i>Parvooscincus leucospilos</i>   | Semiaquatic  |
| Lacertilia | Scincidae        | <i>Parvooscincus manananggalae</i> | Semiaquatic  |
| Lacertilia | Scincidae        | <i>Parvooscincus tikbalangi</i>    | Semiaquatic  |
| Lacertilia | Scincidae        | <i>Sphenomorphus cryptotis</i>     | Semiaquatic  |
| Lacertilia | Scincidae        | <i>Tropidophorus assamensis</i>    | Semiaquatic  |

Table S1 Global list of Freshwater Reptile Species

| Suborder   | Family        | Scientific name                    | How aquatic? |
|------------|---------------|------------------------------------|--------------|
| Lacertilia | Scincidae     | <i>Tropidophorus baconii</i>       | Semiaquatic  |
| Lacertilia | Scincidae     | <i>Tropidophorus baviensis</i>     | Semiaquatic  |
| Lacertilia | Scincidae     | <i>Tropidophorus beccarii</i>      | Semiaquatic  |
| Lacertilia | Scincidae     | <i>Tropidophorus berdmorei</i>     | Semiaquatic  |
| Lacertilia | Scincidae     | <i>Tropidophorus boehmei</i>       | Semiaquatic  |
| Lacertilia | Scincidae     | <i>Tropidophorus brookei</i>       | Semiaquatic  |
| Lacertilia | Scincidae     | <i>Tropidophorus cocincinensis</i> | Semiaquatic  |
| Lacertilia | Scincidae     | <i>Tropidophorus davaoensis</i>    | Semiaquatic  |
| Lacertilia | Scincidae     | <i>Tropidophorus grayi</i>         | Semiaquatic  |
| Lacertilia | Scincidae     | <i>Tropidophorus guangxiensis</i>  | Semiaquatic  |
| Lacertilia | Scincidae     | <i>Tropidophorus hainanus</i>      | Semiaquatic  |
| Lacertilia | Scincidae     | <i>Tropidophorus hangnam</i>       | Semiaquatic  |
| Lacertilia | Scincidae     | <i>Tropidophorus iniquus</i>       | Semiaquatic  |
| Lacertilia | Scincidae     | <i>Tropidophorus laotus</i>        | Semiaquatic  |
| Lacertilia | Scincidae     | <i>Tropidophorus latiscutatus</i>  | Semiaquatic  |
| Lacertilia | Scincidae     | <i>Tropidophorus matsuii</i>       | Semiaquatic  |
| Lacertilia | Scincidae     | <i>Tropidophorus microlepis</i>    | Semiaquatic  |
| Lacertilia | Scincidae     | <i>Tropidophorus micropus</i>      | Semiaquatic  |
| Lacertilia | Scincidae     | <i>Tropidophorus misaminius</i>    | Semiaquatic  |
| Lacertilia | Scincidae     | <i>Tropidophorus mocquardii</i>    | Semiaquatic  |
| Lacertilia | Scincidae     | <i>Tropidophorus murphyi</i>       | Semiaquatic  |
| Lacertilia | Scincidae     | <i>Tropidophorus noggei</i>        | Semiaquatic  |
| Lacertilia | Scincidae     | <i>Tropidophorus partelloi</i>     | Semiaquatic  |
| Lacertilia | Scincidae     | <i>Tropidophorus perplexus</i>     | Semiaquatic  |
| Lacertilia | Scincidae     | <i>Tropidophorus robinsoni</i>     | Semiaquatic  |
| Lacertilia | Scincidae     | <i>Tropidophorus sinicus</i>       | Semiaquatic  |
| Lacertilia | Scincidae     | <i>Tropidophorus thai</i>          | Semiaquatic  |
| Lacertilia | Shinisauridae | <i>Shinisaurus crocodilurus</i>    | Semiaquatic  |
| Lacertilia | Teiidae       | <i>Crocodylurus amazonicus</i>     | Semiaquatic  |
| Lacertilia | Teiidae       | <i>Dracaena guianensis</i>         | Semiaquatic  |
| Lacertilia | Teiidae       | <i>Dracaena paraguayensis</i>      | Semiaquatic  |
| Lacertilia | Teiidae       | <i>Kentropyx altamazonica</i>      | Semiaquatic  |
| Lacertilia | Tropiduridae  | <i>Uranoscodon superciliosum</i>   | Semiaquatic  |
| Lacertilia | Varanidae     | <i>Varanus caerulivirens</i>       | Semiaquatic  |
| Lacertilia | Varanidae     | <i>Varanus cerambonensis</i>       | Semiaquatic  |
| Lacertilia | Varanidae     | <i>Varanus indicus</i>             | Semiaquatic  |
| Lacertilia | Varanidae     | <i>Varanus jobiensis</i>           | Semiaquatic  |
| Lacertilia | Varanidae     | <i>Varanus juxtindicus</i>         | Semiaquatic  |
| Lacertilia | Varanidae     | <i>Varanus melinus</i>             | Semiaquatic  |
| Lacertilia | Varanidae     | <i>Varanus mertensi</i>            | Semiaquatic  |
| Lacertilia | Varanidae     | <i>Varanus mitchelli</i>           | Semiaquatic  |
| Lacertilia | Varanidae     | <i>Varanus niloticus</i>           | Semiaquatic  |
| Lacertilia | Varanidae     | <i>Varanus ornatus</i>             | Semiaquatic  |

Table S1 Global list of Freshwater Reptile Species

| Suborder   | Family        | Scientific name                    | How aquatic?  |
|------------|---------------|------------------------------------|---------------|
| Lacertilia | Varanidae     | <i>Varanus salvator</i>            | Semiaquatic   |
| Lacertilia | Varanidae     | <i>Varanus semiremex</i>           | Semiaquatic   |
| Serpentes  | Acrochordidae | <i>Acrochordus arafurae</i>        | Fully aquatic |
| Serpentes  | Acrochordidae | <i>Acrochordus javanicus</i>       | Fully aquatic |
| Serpentes  | Aniliidae     | <i>Anilius scytale</i>             | Fully aquatic |
| Serpentes  | Boidae        | <i>Eunectes beniensis</i>          | Fully aquatic |
| Serpentes  | Boidae        | <i>Eunectes deschauenseei</i>      | Fully aquatic |
| Serpentes  | Boidae        | <i>Eunectes murinus</i>            | Fully aquatic |
| Serpentes  | Boidae        | <i>Eunectes notaeus</i>            | Fully aquatic |
| Serpentes  | Colubridae    | <i>Erythrolamprus semiaureus</i>   | Fully aquatic |
| Serpentes  | Colubridae    | <i>Helicops angulatus</i>          | Fully aquatic |
| Serpentes  | Colubridae    | <i>Helicops apiaka</i>             | Fully aquatic |
| Serpentes  | Colubridae    | <i>Helicops carinicaudus</i>       | Fully aquatic |
| Serpentes  | Colubridae    | <i>Helicops danieli</i>            | Fully aquatic |
| Serpentes  | Colubridae    | <i>Helicops gomesi</i>             | Fully aquatic |
| Serpentes  | Colubridae    | <i>Helicops hagmanni</i>           | Fully aquatic |
| Serpentes  | Colubridae    | <i>Helicops infrataeniatus</i>     | Fully aquatic |
| Serpentes  | Colubridae    | <i>Helicops leopardinus</i>        | Fully aquatic |
| Serpentes  | Colubridae    | <i>Helicops modestus</i>           | Fully aquatic |
| Serpentes  | Colubridae    | <i>Helicops pastazae</i>           | Fully aquatic |
| Serpentes  | Colubridae    | <i>Helicops petersi</i>            | Fully aquatic |
| Serpentes  | Colubridae    | <i>Helicops polylepis</i>          | Fully aquatic |
| Serpentes  | Colubridae    | <i>Helicops scalaris</i>           | Fully aquatic |
| Serpentes  | Colubridae    | <i>Helicops tapajonicus</i>        | Fully aquatic |
| Serpentes  | Colubridae    | <i>Helicops trivittatus</i>        | Fully aquatic |
| Serpentes  | Colubridae    | <i>Helicops yacu</i>               | Fully aquatic |
| Serpentes  | Colubridae    | <i>Hydrops caesurus</i>            | Fully aquatic |
| Serpentes  | Colubridae    | <i>Regina alleni</i>               | Fully aquatic |
| Serpentes  | Colubridae    | <i>Regina grahamii</i>             | Fully aquatic |
| Serpentes  | Colubridae    | <i>Regina rigida</i>               | Fully aquatic |
| Serpentes  | Colubridae    | <i>Regina septemvittata</i>        | Fully aquatic |
| Serpentes  | Colubridae    | <i>Seminatrix pygaea</i>           | Fully aquatic |
| Serpentes  | Colubridae    | <i>Thamnodynastes strigatus</i>    | Fully aquatic |
| Serpentes  | Colubridae    | <i>Adelophis copei</i>             | Semiaquatic   |
| Serpentes  | Colubridae    | <i>Afronatrix anoscopus</i>        | Semiaquatic   |
| Serpentes  | Colubridae    | <i>Atretium schistosum</i>         | Semiaquatic   |
| Serpentes  | Colubridae    | <i>Atretium yunnanensis</i>        | Semiaquatic   |
| Serpentes  | Colubridae    | <i>Clonophis kirtlandii</i>        | Semiaquatic   |
| Serpentes  | Colubridae    | <i>Coniophanes bipunctatus</i>     | Semiaquatic   |
| Serpentes  | Colubridae    | <i>Crotaphopeltis barotseensis</i> | Semiaquatic   |
| Serpentes  | Colubridae    | <i>Crotaphopeltis degeni</i>       | Semiaquatic   |
| Serpentes  | Colubridae    | <i>Crotaphopeltis hippocrepis</i>  | Semiaquatic   |
| Serpentes  | Colubridae    | <i>Crotaphopeltis hotamboeia</i>   | Semiaquatic   |

Table S1 Global list of Freshwater Reptile Species

| Suborder  | Family     | Scientific name                    | How aquatic? |
|-----------|------------|------------------------------------|--------------|
| Serpentes | Colubridae | <i>Erythrolamprus almadensis</i>   | Semiaquatic  |
| Serpentes | Colubridae | <i>Erythrolamprus cobella</i>      | Semiaquatic  |
| Serpentes | Colubridae | <i>Erythrolamprus frenatus</i>     | Semiaquatic  |
| Serpentes | Colubridae | <i>Erythrolamprus jaegari</i>      | Semiaquatic  |
| Serpentes | Colubridae | <i>Erythrolamprus miliaris</i>     | Semiaquatic  |
| Serpentes | Colubridae | <i>Erythrolamprus poecilogyrus</i> | Semiaquatic  |
| Serpentes | Colubridae | <i>Farancia abacura</i>            | Semiaquatic  |
| Serpentes | Colubridae | <i>Farancia erytrogramma</i>       | Semiaquatic  |
| Serpentes | Colubridae | <i>Gomesophis brasiliensis</i>     | Semiaquatic  |
| Serpentes | Colubridae | <i>Grayia caesar</i>               | Semiaquatic  |
| Serpentes | Colubridae | <i>Grayia ornata</i>               | Semiaquatic  |
| Serpentes | Colubridae | <i>Grayia smithii</i>              | Semiaquatic  |
| Serpentes | Colubridae | <i>Grayia tholloni</i>             | Semiaquatic  |
| Serpentes | Colubridae | <i>Helophis schoutedeni</i>        | Semiaquatic  |
| Serpentes | Colubridae | <i>Hydrablades periops</i>         | Semiaquatic  |
| Serpentes | Colubridae | <i>Hydrablades praefrontalis</i>   | Semiaquatic  |
| Serpentes | Colubridae | <i>Hydraethiops laevis</i>         | Semiaquatic  |
| Serpentes | Colubridae | <i>Hydraethiops melanogaster</i>   | Semiaquatic  |
| Serpentes | Colubridae | <i>Hydrodynastes bicinctus</i>     | Semiaquatic  |
| Serpentes | Colubridae | <i>Hydrodynastes gigas</i>         | Semiaquatic  |
| Serpentes | Colubridae | <i>Hydrodynastes melanogigas</i>   | Semiaquatic  |
| Serpentes | Colubridae | <i>Hydromorphus concolor</i>       | Semiaquatic  |
| Serpentes | Colubridae | <i>Hydromorphus dunni</i>          | Semiaquatic  |
| Serpentes | Colubridae | <i>Hydrops martii</i>              | Semiaquatic  |
| Serpentes | Colubridae | <i>Hydrops triangularis</i>        | Semiaquatic  |
| Serpentes | Colubridae | <i>Limnophis bangweolicus</i>      | Semiaquatic  |
| Serpentes | Colubridae | <i>Limnophis bicolor</i>           | Semiaquatic  |
| Serpentes | Colubridae | <i>Liopholidophis lateralis</i>    | Semiaquatic  |
| Serpentes | Colubridae | <i>Liopholidophis sexlineatus</i>  | Semiaquatic  |
| Serpentes | Colubridae | <i>Lygophis anomalus</i>           | Semiaquatic  |
| Serpentes | Colubridae | <i>Lygophis dilepis</i>            | Semiaquatic  |
| Serpentes | Colubridae | <i>Lygophis meridionalis</i>       | Semiaquatic  |
| Serpentes | Colubridae | <i>Macropisthodon flaviceps</i>    | Semiaquatic  |
| Serpentes | Colubridae | <i>Macropisthodon rhodomelas</i>   | Semiaquatic  |
| Serpentes | Colubridae | <i>Natriciteres bipostocularis</i> | Semiaquatic  |
| Serpentes | Colubridae | <i>Natriciteres fuliginoides</i>   | Semiaquatic  |
| Serpentes | Colubridae | <i>Natriciteres olivacea</i>       | Semiaquatic  |
| Serpentes | Colubridae | <i>Natriciteres sylvatica</i>      | Semiaquatic  |
| Serpentes | Colubridae | <i>Natriciteres variegata</i>      | Semiaquatic  |
| Serpentes | Colubridae | <i>Natrix maura</i>                | Semiaquatic  |
| Serpentes | Colubridae | <i>Natrix megalcephala</i>         | Semiaquatic  |
| Serpentes | Colubridae | <i>Natrix tessellata</i>           | Semiaquatic  |
| Serpentes | Colubridae | <i>Nerodia cyclopion</i>           | Semiaquatic  |

Table S1 Global list of Freshwater Reptile Species

| Suborder  | Family     | Scientific name                      | How aquatic? |
|-----------|------------|--------------------------------------|--------------|
| Serpentes | Colubridae | <i>Nerodia erythrogaster</i>         | Semiaquatic  |
| Serpentes | Colubridae | <i>Nerodia fasciata</i>              | Semiaquatic  |
| Serpentes | Colubridae | <i>Nerodia floridana</i>             | Semiaquatic  |
| Serpentes | Colubridae | <i>Nerodia harteri</i>               | Semiaquatic  |
| Serpentes | Colubridae | <i>Nerodia paucimaculata</i>         | Semiaquatic  |
| Serpentes | Colubridae | <i>Nerodia rhombifer</i>             | Semiaquatic  |
| Serpentes | Colubridae | <i>Nerodia sipedon</i>               | Semiaquatic  |
| Serpentes | Colubridae | <i>Nerodia taxispilota</i>           | Semiaquatic  |
| Serpentes | Colubridae | <i>Oocatochus rufodorsatus</i>       | Semiaquatic  |
| Serpentes | Colubridae | <i>Opisthotropis alcalai</i>         | Semiaquatic  |
| Serpentes | Colubridae | <i>Opisthotropis andersonii</i>      | Semiaquatic  |
| Serpentes | Colubridae | <i>Opisthotropis atra</i>            | Semiaquatic  |
| Serpentes | Colubridae | <i>Opisthotropis balteata</i>        | Semiaquatic  |
| Serpentes | Colubridae | <i>Opisthotropis boonsongi</i>       | Semiaquatic  |
| Serpentes | Colubridae | <i>Opisthotropis cheni</i>           | Semiaquatic  |
| Serpentes | Colubridae | <i>Opisthotropis cucae</i>           | Semiaquatic  |
| Serpentes | Colubridae | <i>Opisthotropis daovantieni</i>     | Semiaquatic  |
| Serpentes | Colubridae | <i>Opisthotropis durandi</i>         | Semiaquatic  |
| Serpentes | Colubridae | <i>Opisthotropis guangxiensis</i>    | Semiaquatic  |
| Serpentes | Colubridae | <i>Opisthotropis jacobi</i>          | Semiaquatic  |
| Serpentes | Colubridae | <i>Opisthotropis kikuzatoi</i>       | Semiaquatic  |
| Serpentes | Colubridae | <i>Opisthotropis kuatunensis</i>     | Semiaquatic  |
| Serpentes | Colubridae | <i>Opisthotropis lateralis</i>       | Semiaquatic  |
| Serpentes | Colubridae | <i>Opisthotropis latouchii</i>       | Semiaquatic  |
| Serpentes | Colubridae | <i>Opisthotropis laui</i>            | Semiaquatic  |
| Serpentes | Colubridae | <i>Opisthotropis maculosa</i>        | Semiaquatic  |
| Serpentes | Colubridae | <i>Opisthotropis maxwelli</i>        | Semiaquatic  |
| Serpentes | Colubridae | <i>Opisthotropis rugosa</i>          | Semiaquatic  |
| Serpentes | Colubridae | <i>Opisthotropis spenceri</i>        | Semiaquatic  |
| Serpentes | Colubridae | <i>Opisthotropis tamdaoensis</i>     | Semiaquatic  |
| Serpentes | Colubridae | <i>Opisthotropis typica</i>          | Semiaquatic  |
| Serpentes | Colubridae | <i>Parahelicops annamensis</i>       | Semiaquatic  |
| Serpentes | Colubridae | <i>Paratapinophis praemaxillaris</i> | Semiaquatic  |
| Serpentes | Colubridae | <i>Pseudoeryx plicatilis</i>         | Semiaquatic  |
| Serpentes | Colubridae | <i>Pseudoeryx relictualis</i>        | Semiaquatic  |
| Serpentes | Colubridae | <i>Ptychophis flavovirgatus</i>      | Semiaquatic  |
| Serpentes | Colubridae | <i>Rhabdops olivaceus</i>            | Semiaquatic  |
| Serpentes | Colubridae | <i>Sinonatrix aequifasciata</i>      | Semiaquatic  |
| Serpentes | Colubridae | <i>Sinonatrix annularis</i>          | Semiaquatic  |
| Serpentes | Colubridae | <i>Sinonatrix percarinata</i>        | Semiaquatic  |
| Serpentes | Colubridae | <i>Sinonatrix yunnanensis</i>        | Semiaquatic  |
| Serpentes | Colubridae | <i>Sordellina punctata</i>           | Semiaquatic  |
| Serpentes | Colubridae | <i>Stegonotus cucullatus</i>         | Semiaquatic  |

Table S1 Global list of Freshwater Reptile Species

| Suborder  | Family         | Scientific name                      | How aquatic? |
|-----------|----------------|--------------------------------------|--------------|
| Serpentes | Colubridae     | <i>Thamnodynastes hypoconia</i>      | Semiaquatic  |
| Serpentes | Colubridae     | <i>Thamnophis angustirostris</i>     | Semiaquatic  |
| Serpentes | Colubridae     | <i>Thamnophis atratus</i>            | Semiaquatic  |
| Serpentes | Colubridae     | <i>Thamnophis butleri</i>            | Semiaquatic  |
| Serpentes | Colubridae     | <i>Thamnophis couchii</i>            | Semiaquatic  |
| Serpentes | Colubridae     | <i>Thamnophis cyrtopsis</i>          | Semiaquatic  |
| Serpentes | Colubridae     | <i>Thamnophis eques</i>              | Semiaquatic  |
| Serpentes | Colubridae     | <i>Thamnophis gigas</i>              | Semiaquatic  |
| Serpentes | Colubridae     | <i>Thamnophis hammondi</i>           | Semiaquatic  |
| Serpentes | Colubridae     | <i>Thamnophis marcianus</i>          | Semiaquatic  |
| Serpentes | Colubridae     | <i>Thamnophis melanogaster</i>       | Semiaquatic  |
| Serpentes | Colubridae     | <i>Thamnophis rossmani</i>           | Semiaquatic  |
| Serpentes | Colubridae     | <i>Thamnophis rufipunctatus</i>      | Semiaquatic  |
| Serpentes | Colubridae     | <i>Thamnophis sauritus</i>           | Semiaquatic  |
| Serpentes | Colubridae     | <i>Thamnophis valida</i>             | Semiaquatic  |
| Serpentes | Colubridae     | <i>Thermophis baileyi</i>            | Semiaquatic  |
| Serpentes | Colubridae     | <i>Thermophis zhaoermii</i>          | Semiaquatic  |
| Serpentes | Colubridae     | <i>Tretanorhinus mocquardi</i>       | Semiaquatic  |
| Serpentes | Colubridae     | <i>Tretanorhinus nigroluteus</i>     | Semiaquatic  |
| Serpentes | Colubridae     | <i>Tretanorhinus taeniatus</i>       | Semiaquatic  |
| Serpentes | Colubridae     | <i>Tretanorhinus variabilis</i>      | Semiaquatic  |
| Serpentes | Colubridae     | <i>Tropidonophis mairii</i>          | Semiaquatic  |
| Serpentes | Colubridae     | <i>Tropidonophis negrosensis</i>     | Semiaquatic  |
| Serpentes | Colubridae     | <i>Xenochrophis asperrimus</i>       | Semiaquatic  |
| Serpentes | Colubridae     | <i>Xenochrophis bellula</i>          | Semiaquatic  |
| Serpentes | Colubridae     | <i>Xenochrophis cerasogaster</i>     | Semiaquatic  |
| Serpentes | Colubridae     | <i>Xenochrophis flavipunctatus</i>   | Semiaquatic  |
| Serpentes | Colubridae     | <i>Xenochrophis maculatus</i>        | Semiaquatic  |
| Serpentes | Colubridae     | <i>Xenochrophis melanzostus</i>      | Semiaquatic  |
| Serpentes | Colubridae     | <i>Xenochrophis piscator</i>         | Semiaquatic  |
| Serpentes | Colubridae     | <i>Xenochrophis sanctijohannis</i>   | Semiaquatic  |
| Serpentes | Colubridae     | <i>Xenochrophis schnurrenbergeri</i> | Semiaquatic  |
| Serpentes | Colubridae     | <i>Xenochrophis trianguligerus</i>   | Semiaquatic  |
| Serpentes | Colubridae     | <i>Xenochrophis tytleri</i>          | Semiaquatic  |
| Serpentes | Colubridae     | <i>Xenochrophis vittatus</i>         | Semiaquatic  |
| Serpentes | Cylindrophidae | <i>Cylindrophis ruffus</i>           | Semiaquatic  |
| Serpentes | Elapidae       | <i>Boulengerina annulata</i>         | Semiaquatic  |
| Serpentes | Elapidae       | <i>Boulengerina christyi</i>         | Semiaquatic  |
| Serpentes | Elapidae       | <i>Hemiaspis signata</i>             | Semiaquatic  |
| Serpentes | Elapidae       | <i>Hydrophis brookii</i>             | Semiaquatic  |
| Serpentes | Elapidae       | <i>Hydrophis melanosoma</i>          | Semiaquatic  |
| Serpentes | Elapidae       | <i>Hydrophis semperi</i>             | Semiaquatic  |
| Serpentes | Elapidae       | <i>Hydrophis sibauensis</i>          | Semiaquatic  |



Table S1 Global list of Freshwater Reptile Species

| Suborder  | Family       | Scientific name                   | How aquatic?  |
|-----------|--------------|-----------------------------------|---------------|
| Serpentes | Elapidae     | <i>Hydrophis torquatus</i>        | Semiaquatic   |
| Serpentes | Elapidae     | <i>Kolpophis annandalei</i>       | Semiaquatic   |
| Serpentes | Elapidae     | <i>Laticauda crockeri</i>         | Semiaquatic   |
| Serpentes | Elapidae     | <i>Micrurus nattereri</i>         | Semiaquatic   |
| Serpentes | Elapidae     | <i>Micrurus surinamensis</i>      | Semiaquatic   |
| Serpentes | Elapidae     | <i>Naja melanoleuca</i>           | Semiaquatic   |
| Serpentes | Elapidae     | <i>Naja nigricollis</i>           | Semiaquatic   |
| Serpentes | Elapidae     | <i>Notechis scutatus</i>          | Semiaquatic   |
| Serpentes | Elapidae     | <i>Pseudechis porphyriacus</i>    | Semiaquatic   |
| Serpentes | Elapidae     | <i>Pseudohaje goldii</i>          | Semiaquatic   |
| Serpentes | Elapidae     | <i>Pseudohaje nigra</i>           | Semiaquatic   |
| Serpentes | Homalopsidae | <i>Erpeton tentaculatum</i>       | Fully aquatic |
| Serpentes | Homalopsidae | <i>Brachyorrhos albus</i>         | Semiaquatic   |
| Serpentes | Homalopsidae | <i>Brachyorrhos gastrotaenius</i> | Semiaquatic   |
| Serpentes | Homalopsidae | <i>Brachyorrhos raffrayi</i>      | Semiaquatic   |
| Serpentes | Homalopsidae | <i>Brachyorrhos wallacei</i>      | Semiaquatic   |
| Serpentes | Homalopsidae | <i>Calamophis jobiensis</i>       | Semiaquatic   |
| Serpentes | Homalopsidae | <i>Calamophis katesandersae</i>   | Semiaquatic   |
| Serpentes | Homalopsidae | <i>Calamophis ruuddelangi</i>     | Semiaquatic   |
| Serpentes | Homalopsidae | <i>Calamophis sharonbrooksae</i>  | Semiaquatic   |
| Serpentes | Homalopsidae | <i>Cantoria violacea</i>          | Semiaquatic   |
| Serpentes | Homalopsidae | <i>Dieurostus dussumieri</i>      | Semiaquatic   |
| Serpentes | Homalopsidae | <i>Djokoiskandarus annulata</i>   | Semiaquatic   |
| Serpentes | Homalopsidae | <i>Enhydris albomaculata</i>      | Semiaquatic   |
| Serpentes | Homalopsidae | <i>Enhydris alternans</i>         | Semiaquatic   |
| Serpentes | Homalopsidae | <i>Enhydris bocourti</i>          | Semiaquatic   |
| Serpentes | Homalopsidae | <i>Enhydris chanardi</i>          | Semiaquatic   |
| Serpentes | Homalopsidae | <i>Enhydris doriae</i>            | Semiaquatic   |
| Serpentes | Homalopsidae | <i>Enhydris enhydris</i>          | Semiaquatic   |
| Serpentes | Homalopsidae | <i>Enhydris gyii</i>              | Semiaquatic   |
| Serpentes | Homalopsidae | <i>Enhydris indica</i>            | Semiaquatic   |
| Serpentes | Homalopsidae | <i>Enhydris innominata</i>        | Semiaquatic   |
| Serpentes | Homalopsidae | <i>Enhydris jagorii</i>           | Semiaquatic   |
| Serpentes | Homalopsidae | <i>Enhydris longicauda</i>        | Semiaquatic   |
| Serpentes | Homalopsidae | <i>Enhydris maculosa</i>          | Semiaquatic   |
| Serpentes | Homalopsidae | <i>Enhydris matannensis</i>       | Semiaquatic   |
| Serpentes | Homalopsidae | <i>Enhydris pahangensis</i>       | Semiaquatic   |
| Serpentes | Homalopsidae | <i>Enhydris pakistanica</i>       | Semiaquatic   |
| Serpentes | Homalopsidae | <i>Enhydris plumbea</i>           | Semiaquatic   |
| Serpentes | Homalopsidae | <i>Enhydris punctata</i>          | Semiaquatic   |
| Serpentes | Homalopsidae | <i>Enhydris subtaeniata</i>       | Semiaquatic   |
| Serpentes | Homalopsidae | <i>Enhydris vorisi</i>            | Semiaquatic   |
| Serpentes | Homalopsidae | <i>Ferania sieboldi</i>           | Semiaquatic   |



Table S1 Global list of Freshwater Reptile Species

| Suborder   | Family           | Scientific name                      | How aquatic?           |
|------------|------------------|--------------------------------------|------------------------|
| Serpentes  | Homalopsidae     | <i>Gerarda prevostiana</i>           | Semiaquatic            |
| Serpentes  | Homalopsidae     | <i>Heurnia ventromaculata</i>        | Semiaquatic            |
| Serpentes  | Homalopsidae     | <i>Homalopsis buccata</i>            | Semiaquatic            |
| Serpentes  | Homalopsidae     | <i>Homalopsis hardwickii</i>         | Semiaquatic            |
| Serpentes  | Homalopsidae     | <i>Homalopsis mereljcoxi</i>         | Semiaquatic            |
| Serpentes  | Homalopsidae     | <i>Homalopsis nigroventralis</i>     | Semiaquatic            |
| Serpentes  | Homalopsidae     | <i>Homalopsis semizonata</i>         | Semiaquatic            |
| Serpentes  | Homalopsidae     | <i>Karnsophis siantaris</i>          | Semiaquatic            |
| Serpentes  | Homalopsidae     | <i>Myron karnsi</i>                  | Semiaquatic            |
| Serpentes  | Homalopsidae     | <i>Myron resetari</i>                | Semiaquatic            |
| Serpentes  | Homalopsidae     | <i>Myron richardsonii</i>            | Semiaquatic            |
| Serpentes  | Homalopsidae     | <i>Myrrophis bennettii</i>           | Semiaquatic            |
| Serpentes  | Homalopsidae     | <i>Myrrophis chinensis</i>           | Semiaquatic            |
| Serpentes  | Homalopsidae     | <i>Pseudoferania polylepis</i>       | Semiaquatic            |
| Serpentes  | Lamprophiidae    | <i>Lycodonomorphus bicolor</i>       | Semiaquatic            |
| Serpentes  | Lamprophiidae    | <i>Lycodonomorphus laevis</i>        | Semiaquatic            |
| Serpentes  | Lamprophiidae    | <i>Lycodonomorphus leleupi</i>       | Semiaquatic            |
| Serpentes  | Lamprophiidae    | <i>Lycodonomorphus rufulus</i>       | Semiaquatic            |
| Serpentes  | Lamprophiidae    | <i>Lycodonomorphus subtaeniatus</i>  | Semiaquatic            |
| Serpentes  | Lamprophiidae    | <i>Lycodonomorphus whytii</i>        | Semiaquatic            |
| Serpentes  | Pythonidae       | <i>Liasis fuscus</i>                 | Semiaquatic            |
| Serpentes  | Pythonidae       | <i>Python sebae</i>                  | Semiaquatic            |
| Serpentes  | Viperidae        | <i>Agkistrodon piscivorus</i>        | Semiaquatic            |
| Serpentes  | Xenopeltidae     | <i>Xenopeltis unicolor</i>           | Semiaquatic            |
| Cryptodira | Carettochelyidae | <i>Carettochelys insculpta</i>       | Aquatic or semiaquatic |
| Pleurodira | Chelidae         | <i>Acanthochelys macrocephala</i>    | Aquatic or semiaquatic |
| Pleurodira | Chelidae         | <i>Acanthochelys pallidipectoris</i> | Aquatic or semiaquatic |
| Pleurodira | Chelidae         | <i>Acanthochelys radiolata</i>       | Aquatic or semiaquatic |
| Pleurodira | Chelidae         | <i>Acanthochelys spixii</i>          | Aquatic or semiaquatic |
| Pleurodira | Chelidae         | <i>Chelodina burrungandjii</i>       | Aquatic or semiaquatic |
| Pleurodira | Chelidae         | <i>Chelodina canni</i>               | Aquatic or semiaquatic |
| Pleurodira | Chelidae         | <i>Chelodina expansa</i>             | Aquatic or semiaquatic |
| Pleurodira | Chelidae         | <i>Chelodina gunaleni</i>            | Aquatic or semiaquatic |
| Pleurodira | Chelidae         | <i>Chelodina longicollis</i>         | Aquatic or semiaquatic |
| Pleurodira | Chelidae         | <i>Chelodina mccordi</i>             | Aquatic or semiaquatic |
| Pleurodira | Chelidae         | <i>Chelodina novaeguineae</i>        | Aquatic or semiaquatic |
| Pleurodira | Chelidae         | <i>Chelodina oblonga</i>             | Aquatic or semiaquatic |
| Pleurodira | Chelidae         | <i>Chelodina parkeri</i>             | Aquatic or semiaquatic |
| Pleurodira | Chelidae         | <i>Chelodina pritchardi</i>          | Aquatic or semiaquatic |
| Pleurodira | Chelidae         | <i>Chelodina reimanni</i>            | Aquatic or semiaquatic |
| Pleurodira | Chelidae         | <i>Chelodina rugosa</i>              | Aquatic or semiaquatic |
| Pleurodira | Chelidae         | <i>Chelodina steindachneri</i>       | Aquatic or semiaquatic |
| Pleurodira | Chelidae         | <i>Chelodina timorensis</i>          | Aquatic or semiaquatic |

Table S1 Global list of Freshwater Reptile Species

| Suborder   | Family         | Scientific name                 | How aquatic?           |
|------------|----------------|---------------------------------|------------------------|
| Pleurodira | Chelidae       | <i>Chelodina walloyarrina</i>   | Aquatic or semiaquatic |
| Pleurodira | Chelidae       | <i>Chelus fimbriata</i>         | Aquatic or semiaquatic |
| Pleurodira | Chelidae       | <i>Elseya albagula</i>          | Aquatic or semiaquatic |
| Pleurodira | Chelidae       | <i>Elseya branderhorsti</i>     | Aquatic or semiaquatic |
| Pleurodira | Chelidae       | <i>Elseya dentata</i>           | Aquatic or semiaquatic |
| Pleurodira | Chelidae       | <i>Elseya irwini</i>            | Aquatic or semiaquatic |
| Pleurodira | Chelidae       | <i>Elseya lavarackorum</i>      | Aquatic or semiaquatic |
| Pleurodira | Chelidae       | <i>Elseya novaeguineae</i>      | Aquatic or semiaquatic |
| Pleurodira | Chelidae       | <i>Elusor macrurus</i>          | Aquatic or semiaquatic |
| Pleurodira | Chelidae       | <i>Emydura macquarii</i>        | Aquatic or semiaquatic |
| Pleurodira | Chelidae       | <i>Emydura subglobosa</i>       | Aquatic or semiaquatic |
| Pleurodira | Chelidae       | <i>Emydura tanybaraga</i>       | Aquatic or semiaquatic |
| Pleurodira | Chelidae       | <i>Emydura victoriae</i>        | Aquatic or semiaquatic |
| Pleurodira | Chelidae       | <i>Emydura worrelli</i>         | Aquatic or semiaquatic |
| Pleurodira | Chelidae       | <i>Hydromedusa maximiliani</i>  | Aquatic or semiaquatic |
| Pleurodira | Chelidae       | <i>Hydromedusa tectifera</i>    | Aquatic or semiaquatic |
| Pleurodira | Chelidae       | <i>Mesoclemmys dahli</i>        | Aquatic or semiaquatic |
| Pleurodira | Chelidae       | <i>Mesoclemmys gibba</i>        | Aquatic or semiaquatic |
| Pleurodira | Chelidae       | <i>Mesoclemmys heliostemma</i>  | Aquatic or semiaquatic |
| Pleurodira | Chelidae       | <i>Mesoclemmys hogei</i>        | Aquatic or semiaquatic |
| Pleurodira | Chelidae       | <i>Mesoclemmys nasuta</i>       | Aquatic or semiaquatic |
| Pleurodira | Chelidae       | <i>Mesoclemmys perplexa</i>     | Aquatic or semiaquatic |
| Pleurodira | Chelidae       | <i>Mesoclemmys raniceps</i>     | Aquatic or semiaquatic |
| Pleurodira | Chelidae       | <i>Mesoclemmys tuberculata</i>  | Aquatic or semiaquatic |
| Pleurodira | Chelidae       | <i>Mesoclemmys vanderhaegei</i> | Aquatic or semiaquatic |
| Pleurodira | Chelidae       | <i>Mesoclemmys zuliae</i>       | Aquatic or semiaquatic |
| Pleurodira | Chelidae       | <i>Myuchelys bellii</i>         | Aquatic or semiaquatic |
| Pleurodira | Chelidae       | <i>Myuchelys georgesi</i>       | Aquatic or semiaquatic |
| Pleurodira | Chelidae       | <i>Myuchelys latisternum</i>    | Aquatic or semiaquatic |
| Pleurodira | Chelidae       | <i>Myuchelys purvisi</i>        | Aquatic or semiaquatic |
| Pleurodira | Chelidae       | <i>Phrynops Geoffroanus</i>     | Aquatic or semiaquatic |
| Pleurodira | Chelidae       | <i>Phrynops hilarii</i>         | Aquatic or semiaquatic |
| Pleurodira | Chelidae       | <i>Phrynops tuberosus</i>       | Aquatic or semiaquatic |
| Pleurodira | Chelidae       | <i>Phrynops williamsi</i>       | Aquatic or semiaquatic |
| Pleurodira | Chelidae       | <i>Platemys platycephala</i>    | Aquatic or semiaquatic |
| Pleurodira | Chelidae       | <i>Pseudemydura umbrina</i>     | Aquatic or semiaquatic |
| Pleurodira | Chelidae       | <i>Rheodytes leukops</i>        | Aquatic or semiaquatic |
| Pleurodira | Chelidae       | <i>Rhinemys rufipes</i>         | Aquatic or semiaquatic |
| Cryptodira | Chelydridae    | <i>Chelydra acutirostris</i>    | Aquatic or semiaquatic |
| Cryptodira | Chelydridae    | <i>Chelydra rossignonii</i>     | Aquatic or semiaquatic |
| Cryptodira | Chelydridae    | <i>Chelydra serpentina</i>      | Aquatic or semiaquatic |
| Cryptodira | Chelydridae    | <i>Macrochelys temminckii</i>   | Aquatic or semiaquatic |
| Cryptodira | Dermatemydidae | <i>Dermatemys mawii</i>         | Aquatic or semiaquatic |

Table S1 Global list of Freshwater Reptile Species

| Suborder   | Family   | Scientific name                    | How aquatic?           |
|------------|----------|------------------------------------|------------------------|
| Cryptodira | Emydidae | <i>Actinemys marmorata</i>         | Aquatic or semiaquatic |
| Cryptodira | Emydidae | <i>Chrysemys dorsalis</i>          | Aquatic or semiaquatic |
| Cryptodira | Emydidae | <i>Chrysemys picta</i>             | Aquatic or semiaquatic |
| Cryptodira | Emydidae | <i>Clemmys guttata</i>             | Aquatic or semiaquatic |
| Cryptodira | Emydidae | <i>Deirochelys reticularia</i>     | Aquatic or semiaquatic |
| Cryptodira | Emydidae | <i>Emydoidea blandingii</i>        | Aquatic or semiaquatic |
| Cryptodira | Emydidae | <i>Emys orbicularis</i>            | Aquatic or semiaquatic |
| Cryptodira | Emydidae | <i>Emys trinacris</i>              | Aquatic or semiaquatic |
| Cryptodira | Emydidae | <i>Glyptemys insculpta</i>         | Aquatic or semiaquatic |
| Cryptodira | Emydidae | <i>Glyptemys muhlenbergii</i>      | Aquatic or semiaquatic |
| Cryptodira | Emydidae | <i>Graptemys barbouri</i>          | Aquatic or semiaquatic |
| Cryptodira | Emydidae | <i>Graptemys caglei</i>            | Aquatic or semiaquatic |
| Cryptodira | Emydidae | <i>Graptemys ernsti</i>            | Aquatic or semiaquatic |
| Cryptodira | Emydidae | <i>Graptemys flavimaculata</i>     | Aquatic or semiaquatic |
| Cryptodira | Emydidae | <i>Graptemys geographica</i>       | Aquatic or semiaquatic |
| Cryptodira | Emydidae | <i>Graptemys gibbonsi</i>          | Aquatic or semiaquatic |
| Cryptodira | Emydidae | <i>Graptemys nigrinoda</i>         | Aquatic or semiaquatic |
| Cryptodira | Emydidae | <i>Graptemys oculifera</i>         | Aquatic or semiaquatic |
| Cryptodira | Emydidae | <i>Graptemys ouachitensis</i>      | Aquatic or semiaquatic |
| Cryptodira | Emydidae | <i>Graptemys pearlensis</i>        | Aquatic or semiaquatic |
| Cryptodira | Emydidae | <i>Graptemys pseudogeographica</i> | Aquatic or semiaquatic |
| Cryptodira | Emydidae | <i>Graptemys pulchra</i>           | Aquatic or semiaquatic |
| Cryptodira | Emydidae | <i>Graptemys sabinensis</i>        | Aquatic or semiaquatic |
| Cryptodira | Emydidae | <i>Graptemys versa</i>             | Aquatic or semiaquatic |
| Cryptodira | Emydidae | <i>Malaclemys terrapin</i>         | Aquatic or semiaquatic |
| Cryptodira | Emydidae | <i>Pseudemys alabamensis</i>       | Aquatic or semiaquatic |
| Cryptodira | Emydidae | <i>Pseudemys concinna</i>          | Aquatic or semiaquatic |
| Cryptodira | Emydidae | <i>Pseudemys floridana</i>         | Aquatic or semiaquatic |
| Cryptodira | Emydidae | <i>Pseudemys gorzugi</i>           | Aquatic or semiaquatic |
| Cryptodira | Emydidae | <i>Pseudemys nelsoni</i>           | Aquatic or semiaquatic |
| Cryptodira | Emydidae | <i>Pseudemys peninsularis</i>      | Aquatic or semiaquatic |
| Cryptodira | Emydidae | <i>Pseudemys rubriventris</i>      | Aquatic or semiaquatic |
| Cryptodira | Emydidae | <i>Pseudemys texana</i>            | Aquatic or semiaquatic |
| Cryptodira | Emydidae | <i>Terrapene carolina</i>          | Aquatic or semiaquatic |
| Cryptodira | Emydidae | <i>Terrapene coahuila</i>          | Aquatic or semiaquatic |
| Cryptodira | Emydidae | <i>Terrapene mexicana</i>          | Aquatic or semiaquatic |
| Cryptodira | Emydidae | <i>Terrapene nelsoni</i>           | Aquatic or semiaquatic |
| Cryptodira | Emydidae | <i>Terrapene ornata</i>            | Aquatic or semiaquatic |
| Cryptodira | Emydidae | <i>Terrapene yucatana</i>          | Aquatic or semiaquatic |
| Cryptodira | Emydidae | <i>Trachemys adiutrix</i>          | Aquatic or semiaquatic |
| Cryptodira | Emydidae | <i>Trachemys callirostris</i>      | Aquatic or semiaquatic |
| Cryptodira | Emydidae | <i>Trachemys decorata</i>          | Aquatic or semiaquatic |
| Cryptodira | Emydidae | <i>Trachemys decussata</i>         | Aquatic or semiaquatic |

Table S1 Global list of Freshwater Reptile Species

| Suborder   | Family      | Scientific name             | How aquatic?           |
|------------|-------------|-----------------------------|------------------------|
| Cryptodira | Emydidae    | <i>Trachemys dorbignii</i>  | Aquatic or semiaquatic |
| Cryptodira | Emydidae    | <i>Trachemys emolli</i>     | Aquatic or semiaquatic |
| Cryptodira | Emydidae    | <i>Trachemys gaigeae</i>    | Aquatic or semiaquatic |
| Cryptodira | Emydidae    | <i>Trachemys nebulosa</i>   | Aquatic or semiaquatic |
| Cryptodira | Emydidae    | <i>Trachemys ornata</i>     | Aquatic or semiaquatic |
| Cryptodira | Emydidae    | <i>Trachemys scripta</i>    | Aquatic or semiaquatic |
| Cryptodira | Emydidae    | <i>Trachemys stejnegeri</i> | Aquatic or semiaquatic |
| Cryptodira | Emydidae    | <i>Trachemys taylori</i>    | Aquatic or semiaquatic |
| Cryptodira | Emydidae    | <i>Trachemys terrapen</i>   | Aquatic or semiaquatic |
| Cryptodira | Emydidae    | <i>Trachemys venusta</i>    | Aquatic or semiaquatic |
| Cryptodira | Emydidae    | <i>Trachemys yaquia</i>     | Aquatic or semiaquatic |
| Cryptodira | Geoemydidae | <i>Batagur affinis</i>      | Aquatic or semiaquatic |
| Cryptodira | Geoemydidae | <i>Batagur baska</i>        | Aquatic or semiaquatic |
| Cryptodira | Geoemydidae | <i>Batagur borneoensis</i>  | Aquatic or semiaquatic |
| Cryptodira | Geoemydidae | <i>Batagur dhongoka</i>     | Aquatic or semiaquatic |
| Cryptodira | Geoemydidae | <i>Batagur kachuga</i>      | Aquatic or semiaquatic |
| Cryptodira | Geoemydidae | <i>Batagur trivittata</i>   | Aquatic or semiaquatic |
| Cryptodira | Geoemydidae | <i>Cuora amboinensis</i>    | Aquatic or semiaquatic |
| Cryptodira | Geoemydidae | <i>Cuora aurocapitata</i>   | Aquatic or semiaquatic |
| Cryptodira | Geoemydidae | <i>Cuora bourreti</i>       | Aquatic or semiaquatic |
| Cryptodira | Geoemydidae | <i>Cuora flavomarginata</i> | Aquatic or semiaquatic |
| Cryptodira | Geoemydidae | <i>Cuora galbinifrons</i>   | Aquatic or semiaquatic |
| Cryptodira | Geoemydidae | <i>Cuora mccordi</i>        | Aquatic or semiaquatic |
| Cryptodira | Geoemydidae | <i>Cuora mouhotii</i>       | Aquatic or semiaquatic |
| Cryptodira | Geoemydidae | <i>Cuora pani</i>           | Aquatic or semiaquatic |
| Cryptodira | Geoemydidae | <i>Cuora picturata</i>      | Aquatic or semiaquatic |
| Cryptodira | Geoemydidae | <i>Cuora trifasciata</i>    | Aquatic or semiaquatic |
| Cryptodira | Geoemydidae | <i>Cuora yunnanensis</i>    | Aquatic or semiaquatic |
| Cryptodira | Geoemydidae | <i>Cuora zhoui</i>          | Aquatic or semiaquatic |
| Cryptodira | Geoemydidae | <i>Cyclemys atripons</i>    | Aquatic or semiaquatic |
| Cryptodira | Geoemydidae | <i>Cyclemys dentata</i>     | Aquatic or semiaquatic |
| Cryptodira | Geoemydidae | <i>Cyclemys enigmatica</i>  | Aquatic or semiaquatic |
| Cryptodira | Geoemydidae | <i>Cyclemys fusca</i>       | Aquatic or semiaquatic |
| Cryptodira | Geoemydidae | <i>Cyclemys gemeli</i>      | Aquatic or semiaquatic |
| Cryptodira | Geoemydidae | <i>Cyclemys oldhamii</i>    | Aquatic or semiaquatic |
| Cryptodira | Geoemydidae | <i>Cyclemys pulchriata</i>  | Aquatic or semiaquatic |
| Cryptodira | Geoemydidae | <i>Geoclemys hamiltonii</i> | Aquatic or semiaquatic |
| Cryptodira | Geoemydidae | <i>Geoemyda japonica</i>    | Aquatic or semiaquatic |
| Cryptodira | Geoemydidae | <i>Geoemyda spengleri</i>   | Aquatic or semiaquatic |
| Cryptodira | Geoemydidae | <i>Hardella thurjii</i>     | Aquatic or semiaquatic |
| Cryptodira | Geoemydidae | <i>Heosemys annandalii</i>  | Aquatic or semiaquatic |
| Cryptodira | Geoemydidae | <i>Heosemys depressa</i>    | Aquatic or semiaquatic |
| Cryptodira | Geoemydidae | <i>Heosemys grandis</i>     | Aquatic or semiaquatic |

Table S1 Global list of Freshwater Reptile Species

| Suborder   | Family        | Scientific name                     | How aquatic?           |
|------------|---------------|-------------------------------------|------------------------|
| Cryptodira | Geoemydidae   | <i>Heosemys spinosa</i>             | Aquatic or semiaquatic |
| Cryptodira | Geoemydidae   | <i>Leucocephalon yuwonoi</i>        | Aquatic or semiaquatic |
| Cryptodira | Geoemydidae   | <i>Malayemys macrocephala</i>       | Aquatic or semiaquatic |
| Cryptodira | Geoemydidae   | <i>Malayemys subtrijuga</i>         | Aquatic or semiaquatic |
| Cryptodira | Geoemydidae   | <i>Mauremys annamensis</i>          | Aquatic or semiaquatic |
| Cryptodira | Geoemydidae   | <i>Mauremys caspica</i>             | Aquatic or semiaquatic |
| Cryptodira | Geoemydidae   | <i>Mauremys japonica</i>            | Aquatic or semiaquatic |
| Cryptodira | Geoemydidae   | <i>Mauremys leprosa</i>             | Aquatic or semiaquatic |
| Cryptodira | Geoemydidae   | <i>Mauremys mutica</i>              | Aquatic or semiaquatic |
| Cryptodira | Geoemydidae   | <i>Mauremys nigricans</i>           | Aquatic or semiaquatic |
| Cryptodira | Geoemydidae   | <i>Mauremys reevesii</i>            | Aquatic or semiaquatic |
| Cryptodira | Geoemydidae   | <i>Mauremys rivulata</i>            | Aquatic or semiaquatic |
| Cryptodira | Geoemydidae   | <i>Mauremys sinensis</i>            | Aquatic or semiaquatic |
| Cryptodira | Geoemydidae   | <i>Melanochelys tricarinata</i>     | Aquatic or semiaquatic |
| Cryptodira | Geoemydidae   | <i>Melanochelys trijuga</i>         | Aquatic or semiaquatic |
| Cryptodira | Geoemydidae   | <i>Morenia ocellata</i>             | Aquatic or semiaquatic |
| Cryptodira | Geoemydidae   | <i>Morenia petersi</i>              | Aquatic or semiaquatic |
| Cryptodira | Geoemydidae   | <i>Notochelys platynota</i>         | Aquatic or semiaquatic |
| Cryptodira | Geoemydidae   | <i>Orlitia borneensis</i>           | Aquatic or semiaquatic |
| Cryptodira | Geoemydidae   | <i>Pangshura smithii</i>            | Aquatic or semiaquatic |
| Cryptodira | Geoemydidae   | <i>Pangshura sylhetensis</i>        | Aquatic or semiaquatic |
| Cryptodira | Geoemydidae   | <i>Pangshura tecta</i>              | Aquatic or semiaquatic |
| Cryptodira | Geoemydidae   | <i>Pangshura tentoria</i>           | Aquatic or semiaquatic |
| Cryptodira | Geoemydidae   | <i>Rhinoclemmys annulata</i>        | Aquatic or semiaquatic |
| Cryptodira | Geoemydidae   | <i>Rhinoclemmys areolata</i>        | Aquatic or semiaquatic |
| Cryptodira | Geoemydidae   | <i>Rhinoclemmys diademata</i>       | Aquatic or semiaquatic |
| Cryptodira | Geoemydidae   | <i>Rhinoclemmys funerea</i>         | Aquatic or semiaquatic |
| Cryptodira | Geoemydidae   | <i>Rhinoclemmys melanosterna</i>    | Aquatic or semiaquatic |
| Cryptodira | Geoemydidae   | <i>Rhinoclemmys nasuta</i>          | Aquatic or semiaquatic |
| Cryptodira | Geoemydidae   | <i>Rhinoclemmys pulcherrima</i>     | Aquatic or semiaquatic |
| Cryptodira | Geoemydidae   | <i>Rhinoclemmys punctularia</i>     | Aquatic or semiaquatic |
| Cryptodira | Geoemydidae   | <i>Rhinoclemmys rubida</i>          | Aquatic or semiaquatic |
| Cryptodira | Geoemydidae   | <i>Sacalia bealei</i>               | Aquatic or semiaquatic |
| Cryptodira | Geoemydidae   | <i>Sacalia quadriocellata</i>       | Aquatic or semiaquatic |
| Cryptodira | Geoemydidae   | <i>Siebenrockiella crassicollis</i> | Aquatic or semiaquatic |
| Cryptodira | Geoemydidae   | <i>Siebenrockiella leytensis</i>    | Aquatic or semiaquatic |
| Cryptodira | Geoemydidae   | <i>Vijayachelys silvatica</i>       | Aquatic or semiaquatic |
| Cryptodira | Kinosternidae | <i>Claudius angustatus</i>          | Aquatic or semiaquatic |
| Cryptodira | Kinosternidae | <i>Kinosternon acutum</i>           | Aquatic or semiaquatic |
| Cryptodira | Kinosternidae | <i>Kinosternon alamosae</i>         | Aquatic or semiaquatic |
| Cryptodira | Kinosternidae | <i>Kinosternon angustipons</i>      | Aquatic or semiaquatic |
| Cryptodira | Kinosternidae | <i>Kinosternon arizonense</i>       | Aquatic or semiaquatic |
| Cryptodira | Kinosternidae | <i>Kinosternon baurii</i>           | Aquatic or semiaquatic |

Table S1 Global list of Freshwater Reptile Species

| Suborder   | Family         | Scientific name                      | How aquatic?           |
|------------|----------------|--------------------------------------|------------------------|
| Cryptodira | Kinosternidae  | <i>Kinosternon chimalhuaca</i>       | Aquatic or semiaquatic |
| Cryptodira | Kinosternidae  | <i>Kinosternon creaseri</i>          | Aquatic or semiaquatic |
| Cryptodira | Kinosternidae  | <i>Kinosternon dunni</i>             | Aquatic or semiaquatic |
| Cryptodira | Kinosternidae  | <i>Kinosternon durangoense</i>       | Aquatic or semiaquatic |
| Cryptodira | Kinosternidae  | <i>Kinosternon flavescens</i>        | Aquatic or semiaquatic |
| Cryptodira | Kinosternidae  | <i>Kinosternon herrerae</i>          | Aquatic or semiaquatic |
| Cryptodira | Kinosternidae  | <i>Kinosternon hirtipes</i>          | Aquatic or semiaquatic |
| Cryptodira | Kinosternidae  | <i>Kinosternon integrum</i>          | Aquatic or semiaquatic |
| Cryptodira | Kinosternidae  | <i>Kinosternon leucostomum</i>       | Aquatic or semiaquatic |
| Cryptodira | Kinosternidae  | <i>Kinosternon oaxacae</i>           | Aquatic or semiaquatic |
| Cryptodira | Kinosternidae  | <i>Kinosternon scorioides</i>        | Aquatic or semiaquatic |
| Cryptodira | Kinosternidae  | <i>Kinosternon sonoriense</i>        | Aquatic or semiaquatic |
| Cryptodira | Kinosternidae  | <i>Kinosternon subrubrum</i>         | Aquatic or semiaquatic |
| Cryptodira | Kinosternidae  | <i>Staurotypus salvinii</i>          | Aquatic or semiaquatic |
| Cryptodira | Kinosternidae  | <i>Staurotypus triporcatus</i>       | Aquatic or semiaquatic |
| Cryptodira | Kinosternidae  | <i>Sternotherus carinatus</i>        | Aquatic or semiaquatic |
| Cryptodira | Kinosternidae  | <i>Sternotherus depressus</i>        | Aquatic or semiaquatic |
| Cryptodira | Kinosternidae  | <i>Sternotherus minor</i>            | Aquatic or semiaquatic |
| Pleurodira | Kinosternidae  | <i>Sternotherus odoratus</i>         | Aquatic or semiaquatic |
| Pleurodira | Pelomedusidae  | <i>Pelomedusa subrufa</i>            | Aquatic or semiaquatic |
| Pleurodira | Pelomedusidae  | <i>Pelusios adansonii</i>            | Aquatic or semiaquatic |
| Pleurodira | Pelomedusidae  | <i>Pelusios bechuanicus</i>          | Aquatic or semiaquatic |
| Pleurodira | Pelomedusidae  | <i>Pelusios broadleyi</i>            | Aquatic or semiaquatic |
| Pleurodira | Pelomedusidae  | <i>Pelusios carinatus</i>            | Aquatic or semiaquatic |
| Pleurodira | Pelomedusidae  | <i>Pelusios castaneus</i>            | Aquatic or semiaquatic |
| Pleurodira | Pelomedusidae  | <i>Pelusios castanoides</i>          | Aquatic or semiaquatic |
| Pleurodira | Pelomedusidae  | <i>Pelusios chapini</i>              | Aquatic or semiaquatic |
| Pleurodira | Pelomedusidae  | <i>Pelusios cupulatta</i>            | Aquatic or semiaquatic |
| Pleurodira | Pelomedusidae  | <i>Pelusios gabonensis</i>           | Aquatic or semiaquatic |
| Pleurodira | Pelomedusidae  | <i>Pelusios marani</i>               | Aquatic or semiaquatic |
| Pleurodira | Pelomedusidae  | <i>Pelusios nanus</i>                | Aquatic or semiaquatic |
| Pleurodira | Pelomedusidae  | <i>Pelusios niger</i>                | Aquatic or semiaquatic |
| Pleurodira | Pelomedusidae  | <i>Pelusios rhodesianus</i>          | Aquatic or semiaquatic |
| Pleurodira | Pelomedusidae  | <i>Pelusios seychellensis</i>        | Aquatic or semiaquatic |
| Pleurodira | Pelomedusidae  | <i>Pelusios sinuatus</i>             | Aquatic or semiaquatic |
| Pleurodira | Pelomedusidae  | <i>Pelusios subniger</i>             | Aquatic or semiaquatic |
| Pleurodira | Pelomedusidae  | <i>Pelusios upembae</i>              | Aquatic or semiaquatic |
| Pleurodira | Pelomedusidae  | <i>Pelusios williamsi</i>            | Aquatic or semiaquatic |
| Cryptodira | Platysternidae | <i>Platysternon megacephalum</i>     | Aquatic or semiaquatic |
| Pleurodira | Podocnemididae | <i>Erymnochelys madagascariensis</i> | Aquatic or semiaquatic |
| Pleurodira | Podocnemididae | <i>Peltocephalus dumerilianus</i>    | Aquatic or semiaquatic |
| Pleurodira | Podocnemididae | <i>Podocnemis erythrocephala</i>     | Aquatic or semiaquatic |
| Pleurodira | Podocnemididae | <i>Podocnemis expansa</i>            | Aquatic or semiaquatic |

Table S1 Global list of Freshwater Reptile Species

| Suborder   | Family       | Scientific name                  | How aquatic?           |
|------------|--------------|----------------------------------|------------------------|
| Pleurodira | Podecnimidae | <i>Podocnemis lewyana</i>        | Aquatic or semiaquatic |
| Pleurodira | Podecnimidae | <i>Podocnemis sextuberculata</i> | Aquatic or semiaquatic |
| Pleurodira | Podecnimidae | <i>Podocnemis unifilis</i>       | Aquatic or semiaquatic |
| Pleurodira | Podecnimidae | <i>Podocnemis vogli</i>          | Aquatic or semiaquatic |
| Cryptodira | Trionychidae | <i>Amyda cartilaginea</i>        | Aquatic or semiaquatic |
| Cryptodira | Trionychidae | <i>Apalone atra</i>              | Aquatic or semiaquatic |
| Cryptodira | Trionychidae | <i>Apalone ferox</i>             | Aquatic or semiaquatic |
| Cryptodira | Trionychidae | <i>Apalone mutica</i>            | Aquatic or semiaquatic |
| Cryptodira | Trionychidae | <i>Apalone spinifera</i>         | Aquatic or semiaquatic |
| Cryptodira | Trionychidae | <i>Chitra chitra</i>             | Aquatic or semiaquatic |
| Cryptodira | Trionychidae | <i>Chitra indica</i>             | Aquatic or semiaquatic |
| Cryptodira | Trionychidae | <i>Chitra vandijki</i>           | Aquatic or semiaquatic |
| Cryptodira | Trionychidae | <i>Cyclanorbis elegans</i>       | Aquatic or semiaquatic |
| Cryptodira | Trionychidae | <i>Cyclanorbis senegalensis</i>  | Aquatic or semiaquatic |
| Cryptodira | Trionychidae | <i>Cycloderma aubryi</i>         | Aquatic or semiaquatic |
| Cryptodira | Trionychidae | <i>Cycloderma frenatum</i>       | Aquatic or semiaquatic |
| Cryptodira | Trionychidae | <i>Dogania subplana</i>          | Aquatic or semiaquatic |
| Cryptodira | Trionychidae | <i>Lissemys ceylonensis</i>      | Aquatic or semiaquatic |
| Cryptodira | Trionychidae | <i>Lissemys punctata</i>         | Aquatic or semiaquatic |
| Cryptodira | Trionychidae | <i>Lissemys scutata</i>          | Aquatic or semiaquatic |
| Cryptodira | Trionychidae | <i>Nilssonia formosa</i>         | Aquatic or semiaquatic |
| Cryptodira | Trionychidae | <i>Nilssonia gangetica</i>       | Aquatic or semiaquatic |
| Cryptodira | Trionychidae | <i>Nilssonia hurum</i>           | Aquatic or semiaquatic |
| Cryptodira | Trionychidae | <i>Nilssonia leithii</i>         | Aquatic or semiaquatic |
| Cryptodira | Trionychidae | <i>Nilssonia nigricans</i>       | Aquatic or semiaquatic |
| Cryptodira | Trionychidae | <i>Palea steindachneri</i>       | Aquatic or semiaquatic |
| Cryptodira | Trionychidae | <i>Pelochelys bibroni</i>        | Aquatic or semiaquatic |
| Cryptodira | Trionychidae | <i>Pelochelys cantorii</i>       | Aquatic or semiaquatic |
| Cryptodira | Trionychidae | <i>Pelochelys signifera</i>      | Aquatic or semiaquatic |
| Cryptodira | Trionychidae | <i>Pelodiscus axenaria</i>       | Aquatic or semiaquatic |
| Cryptodira | Trionychidae | <i>Pelodiscus maackii</i>        | Aquatic or semiaquatic |
| Cryptodira | Trionychidae | <i>Pelodiscus parviformis</i>    | Aquatic or semiaquatic |
| Cryptodira | Trionychidae | <i>Pelodiscus sinensis</i>       | Aquatic or semiaquatic |
| Cryptodira | Trionychidae | <i>Rafetus euphraticus</i>       | Aquatic or semiaquatic |
| Cryptodira | Trionychidae | <i>Rafetus swinhoei</i>          | Aquatic or semiaquatic |
| Cryptodira | Trionychidae | <i>Trionyx triunguis</i>         | Aquatic or semiaquatic |
