# Supplementary material
Source: MDPI journal article supplement (https://www.mdpi.com/2073-4441/12/3/651)
Supplement: s1 [file s1]

Table S4: Environmental data for habitat suitability modelling

Full list of environmental variables evaluated for inclusion as predictor variables in habitat suitability modelling. NSW Office of Environment and Heritage (2017). The final column provides information that is available on the source of the information including references for publication. The full details of references are given in the references section after this table.

| Group    | LayerName    | Layer Description                                                                                                                                                                                                                                                       | Units   | Type  | Original Resolution | Reference/ source                     |
|----------|--------------|-------------------------------------------------------------------------------------------------------------------------------------------------------------------------------------------------------------------------------------------------------------------------|---------|-------|---------------------|---------------------------------------|
| Landform | lf_aspect    | Aspect derived from smoothed DEM (DEM-S)                                                                                                                                                                                                                                | degrees | float | 1 sec (~30 m)       | derived 1 sec SRTM                    |
| Landform | lf_aspect_tr | Beer's Aspect- transformation of aspect to a continuous scaled variable. Changed for the southern hemisphere by setting maximum value (2) to SE slopes (coolest) and minimum (0) to NW slopes (warmest).                                                                | index   | float | 1 sec (~30 m)       | derived 1 sec SRTM                    |
| Landform | lf_cti       | Compound topographic index or CTI also known as wetness index, topographic wetness index. Based on DEM-H (for flow direction and accumulation)                                                                                                                          | index   | float | 1 sec (~30 m)       | derived 1 sec SRTM                    |
| Landform | lf_curv      | Curvature or slope of the slope: defines concave, convex and flat. A positive curvature indicates the surface is upwardly convex at that cell. A negative curvature indicates the surface is upwardly concave at that cell. A value of 0 indicates the surface is flat. | index   | float | 1 sec (~30 m)       | derived 1 sec SRTM                    |
| Landform | lf_curv_plan | Curvature in plan (is perpendicular to the direction of maximum slope)                                                                                                                                                                                                  | index   | float | 1 sec (~30 m)       | derived 1 sec SRTM                    |
| Landform | lf_curv_prof | Curvature in profile (the direction of the maximum slope)                                                                                                                                                                                                               | index   | float | 1 sec (~30 m)       | derived 1 sec SRTM                    |
| Landform | lf_dems1s    | 1 sec SRTM smoothed DEM (DEM-S)                                                                                                                                                                                                                                         | mm      | float | 1 sec (~30 m)       | CSIRO, GeoScience Australia           |
| Landform | lf_exp315    | Exposure to the NW (low = exposed (drier forests); high = sheltered (moister forests)).                                                                                                                                                                                 | index   | float | 1 sec (~30 m)       | Ashcroft M. B. and Gollan J.R. (2012) |
| Landform | lf_logre10   | Cold air drainage                                                                                                                                                                                                                                                       | index   | float | 1 sec (~30 m)       | Ashcroft M. B. and Gollan J.R. (2012) |
| Landform | lf_rough0100 | Neighbourhood topographical roughness based on the standard deviation of elevation in a circular 100 m neighbourhood. Derived from DEM-S                                                                                                                                | index   | float | 1 sec (~30 m)       | derived 1 sec SRTM                    |

Table S4 Environmental Variables

| Group    | LayerName         | Layer Description                                                                                                                         | Units      | Type  | Original Resolution | Reference/ source                                             |
|----------|-------------------|-------------------------------------------------------------------------------------------------------------------------------------------|------------|-------|---------------------|---------------------------------------------------------------|
| Landform | lf_rough0500      | Neighbourhood topographical roughness based on the standard deviation of elevation in a circular 500 m neighbourhood. Derived from DEM-S  | index      | float | 1 sec (~30 m)       | derived 1 sec SRTM                                            |
| Landform | lf_rough1000      | Neighbourhood topographical roughness based on the standard deviation of elevation in a circular 1000 m neighbourhood. Derived from DEM-S | index      | float | 1 sec (~30 m)       | derived 1 sec SRTM                                            |
| Landform | lf_slope_deg      | Slope in degrees. Derived from DEM-S.                                                                                                     | degrees    | float | 1 sec (~30 m)       | derived 1 sec SRTM                                            |
| Landform | lf_tpi0120        | Topographic position index using neighbourhood of 120m radius                                                                             | index      | float | 1 sec (~30 m)       | derived 1 sec SRTM                                            |
| Landform | lf_tpi0250        | Topographic position index using neighbourhood of 250m radius                                                                             | index      | float | 1 sec (~30 m)       | derived 1 sec SRTM                                            |
| Landform | lf_tpi0500        | Topographic position index using neighbourhood of 500m radius                                                                             | index      | float | 1 sec (~30 m)       | derived 1 sec SRTM                                            |
| Landform | lf_tpi1000        | Topographic position index using neighbourhood of 1000m radius                                                                            | index      | float | 1 sec (~30 m)       | derived 1 sec SRTM                                            |
| Landform | lf_tpi2000        | Topographic position index using neighbourhood of 2000m radius                                                                            | index      | float | 1 sec (~30 m)       | derived 1 sec SRTM                                            |
| Soil     | sm_illite20       | relative abundance of illite clay minerals in surficial topsoil (0-20cm)                                                                  | proportion | float | 3 sec (~ 90 m)      | Viscarra Rossel R.A. (2011)                                   |
| Soil     | sm_kaol20         | relative abundance of kaolinite clay minerals in surficial topsoil (0-20cm)                                                               | proportion | float | 3 sec (~ 90 m)      | Viscarra Rossel R.A. (2011)                                   |
| Soil     | sm_smec20         | relative abundance of smectite clay minerals in surficial topsoil (0-20cm)                                                                | proportion | float | 3 sec (~ 90 m)      | Viscarra Rossel R.A. (2011)                                   |
| Soil     | sp_awc000_100prop | Available water capacity proportionally combined depths from 0 to 100 cm                                                                  | %          | float | 3 sec (~ 90 m)      | Soil and Landscape Grid of Australia. Proportion derived OEH. |
| Soil     | sp_awc100_200     | Available water capacity                                                                                                                  | %          | float | 3 sec (~ 90 m)      | Soil and Landscape Grid of Australia                          |
| Soil     | sp_bdw000_100prop | Bulk density proportionally combined depths from 0 to 100 cm                                                                              | g/m3       | float | 3 sec (~ 90 m)      | Soil and Landscape Grid of Australia. Proportion derived OEH. |
| Soil     | sp_bdw100_200     | Bulk density (100 - 200cm)                                                                                                                | g/m3       | float | 3 sec (~ 90 m)      | Soil and Landscape Grid of Australia                          |

Table S4 Environmental Variables

| Group | LayerName         | Layer Description                                                                   | Units            | Type  | Original Resolution | Reference/ source                                             |
|-------|-------------------|-------------------------------------------------------------------------------------|------------------|-------|---------------------|---------------------------------------------------------------|
| Soil  | sp_cly000_100prop | Clay content proportionally combined depths from 0 to 100 cm                        | %                | float | 3 sec (~ 90 m)      | Soil and Landscape Grid of Australia. Proportion derived OEH. |
| Soil  | sp_cly100_200     | Clay content (%) (100 - 200cm)                                                      | %                | float | 3 sec (~ 90 m)      | Soil and Landscape Grid of Australia                          |
| Soil  | sp_des000_200     | Depth of Soil Profile (A and B horizons) 0 to 200 cm depths                         | m                | float | 3 sec (~ 90 m)      | Soil and Landscape Grid of Australia                          |
| Soil  | sp_ece000_100prop | Effective Cation Exchange Capacity proportionally combined depths from 0 to 100 cm. | meq/100g         | float | 3 sec (~ 90 m)      | Soil and Landscape Grid of Australia. Proportion derived OEH. |
| Soil  | sp_ece100_200     | Effective Cation Exchange Capacity (100 - 200 cm)                                   | meq/100g         | float | 3 sec (~ 90 m)      | Soil and Landscape Grid of Australia                          |
| Soil  | sp_nto000_100prop | Total nitrogen proportionally combined depths from 0 to 100 cm                      | %                | float | 3 sec (~ 90 m)      | Soil and Landscape Grid of Australia. Proportion derived OEH. |
| Soil  | sp_nto100_200     | Total nitrogen (%) (100 - 200cm)                                                    | %                | float | 3 sec (~ 90 m)      | Soil and Landscape Grid of Australia                          |
| Soil  | sp_phc000_100prop | pH (calcium chloride) proportionally combined depths from 0 to 100 cm               | pH <sub>Ca</sub> | float | 3 sec (~ 90 m)      | Soil and Landscape Grid of Australia. Proportion derived OEH. |
| Soil  | sp_phc100_200     | pH (calcium chloride) (100 - 200cm)                                                 | pH <sub>Ca</sub> | float | 3 sec (~ 90 m)      | Soil and Landscape Grid of Australia                          |
| Soil  | sp_pto000_100prop | Total phosphorus proportionally combined depths from 0 to 100 cm                    | %                | float | 3 sec (~ 90 m)      | Soil and Landscape Grid of Australia. Proportion derived OEH. |
| Soil  | sp_pto100_200     | Total phosphorus (%) (100 - 200cm)                                                  | %                | float | 3 sec (~ 90 m)      | Soil and Landscape Grid of Australia                          |
| Soil  | sp_slt000_100prop | Silt content proportionally combined depths from 0 to 100 cm                        | %                | float | 3 sec (~ 90 m)      | Soil and Landscape Grid of Australia. Proportion derived OEH. |

Table S4 Environmental Variables

| Group        | LayerName         | Layer Description                                                                                         | Units    | Type  | Original Resolution | Reference/ source                                             |
|--------------|-------------------|-----------------------------------------------------------------------------------------------------------|----------|-------|---------------------|---------------------------------------------------------------|
| Soil         | sp_slt100_200     | Silt content (%) (100 - 200cm)                                                                            | %        | float | 3 sec (~ 90 m)      | Soil and Landscape Grid of Australia                          |
| Soil         | sp_snd000_100prop | Sand content proportionally combined depths from 0 to 100 cm                                              | %        | float | 3 sec (~ 90 m)      | Soil and Landscape Grid of Australia. Proportion derived OEH. |
| Soil         | sp_snd100_200     | Sand content (%) (100 - 200cm)                                                                            | %        | float | 3 sec (~ 90 m)      | Soil and Landscape Grid of Australia                          |
| Soil         | sp_soc000_100     | Organic Carbon proportionally combined depths from 0 to 100 cm                                            | %        | float | 3 sec (~ 90 m)      | Soil and Landscape Grid of Australia. Proportion derived OEH. |
| Soil         | sp_soc100_200     | Organic Carbon                                                                                            | %        | float | 3 sec (~ 90 m)      | Soil and Landscape Grid of Australia                          |
| Soil         | sp_weath_ind      | A weathering intensity index using airborne gamma-ray spectrometry and digital terrain analysis           | index    | float | 100 m               | Wilford, J. (2012)                                            |
| Geophysics   | gp_k_fillspl      | filtered potassium (K), gaps filled in using geographically weighted regression model and spline function | pct      | float | 100 m               | Geoscience Australia. Gaps filled OEH.                        |
| Geophysics   | gp_th_fillspl     | filtered thorium (Th), gaps filled in using geographically weighted regression model and spline function  | ppm      | float | 100 m               | Geoscience Australia. Gaps filled OEH.                        |
| Geophysics   | gp_u_fillspl      | filtered uranium (U), gaps filled in using geographically weighted regression model and spline function   | ppm      | float | 100 m               | Geoscience Australia. Gaps filled OEH.                        |
| Geophysics   | gp_totd_fillspl   | total dose rate, gaps filled in using geographically weighted regression model and spline function        | unitless | float | 100 m               | Geoscience Australia. Gaps filled OEH.                        |
| Geophysics   | gp_tmia           | magnetic intensity                                                                                        | T        | float | 50 m                | Geoscience Australia                                          |
| Geophysics   | gp_tmi_1vda       | 1 <sup>st</sup> derivative magnetic intensity                                                             | T        | float | 50 m                | Geoscience Australia                                          |
| Geophysics   | gp_tmi_2vda       | 2 <sup>nd</sup> derivative magnetic intensity                                                             | T        | float | 50 m                | Geoscience Australia                                          |
| Geophysics   | gp_grav_boug      | Bouguer gravity                                                                                           | mGal     | float | 800 m               | Geoscience Australia                                          |
| Climate/Temp | ct_temp_maxann    | Average daily max temperature - Annual                                                                    | °C       | float | 3 sec (~ 90 m)      | BOM                                                           |
| Climate/Temp | ct_temp_maxsum    | Average daily max temperature - Summer                                                                    | °C       | float | 3 sec (~ 90 m)      | BOM                                                           |
| Climate/Temp | ct_temp_maxwin    | Average daily max temperature - Winter                                                                    | °C       | float | 3 sec (~ 90 m)      | BOM                                                           |

Table S4 Environmental Variables

| Group         | LayerName      | Layer Description                                                 | Units  | Type  | Original Resolution | Reference/ source                              |
|---------------|----------------|-------------------------------------------------------------------|--------|-------|---------------------|------------------------------------------------|
| Climate/Temp  | ct_temp_minann | Average daily min temperature - Annual                            | °C     | float | 3 sec (~ 90 m)      | BOM                                            |
| Climate/Temp  | ct_temp_minsum | Average daily min temperature - Summer                            | °C     | float | 3 sec (~ 90 m)      | BOM                                            |
| Climate/Temp  | ct_temp_minwin | Average daily max temperature - Winter                            | °C     | float | 3 sec (~ 90 m)      | BOM                                            |
| Climate/Temp  | ct_tempann     | Annual Mean Temperature (bio1)                                    | °C     | float | 1 sec               | Xu T. and Hutchinson M. (2011). Generated OEH. |
| Climate/Temp  | ct_tempannrnge | Temperature Annual Range: difference between bio5 and bio6 (bio7) | °C     | float | 1 sec               | Xu T. and Hutchinson M. (2011). Generated OEH. |
| Climate/Temp  | ct_tempcq      | Mean Temperature of Coldest Quarter (bio11)                       | °C     | float | 1 sec               | Xu T. and Hutchinson M. (2011). Generated OEH. |
| Climate/Temp  | ct_tempciurn   | Mean Diurnal Range (Mean(period max-min)) (bio2)                  | °C     | float | 1 sec               | Xu T. and Hutchinson M. (2011). Generated OEH. |
| Climate/Temp  | ct_tempdq      | Mean Temperature of Driest Quarter (bio9)                         | °C     | float | 1 sec               | Xu T. and Hutchinson M. (2011). Generated OEH. |
| Climate/Water | cw_precipann   | Annual Precipitation (bio12)                                      | mm     | float | 1 sec               | Xu T. and Hutchinson M. (2011). Generated OEH. |
| Climate/Water | cw_precipwp    | Precipitation of Wettest Period (bio13)                           | mm     | float | 1 sec               | Xu T. and Hutchinson M. (2011). Generated OEH. |
| Climate/Water | cw_precipdp    | Precipitation of Driest Period (bio14)                            | mm     | float | 1 sec               | Xu T. and Hutchinson M. (2011). Generated OEH. |
| Climate/Water | cw_precipseas  | Precipitation of Seasonality: Coefficient of Variation (bio15)    | C of V | float | 1 sec               | Xu T. and Hutchinson M. (2011). Generated OEH. |
| Climate/Water | cw_precipwetq  | Precipitation of Wettest Quarter (bio16)                          | mm     | float | 1 sec               | Xu T. and Hutchinson M. (2011). Generated OEH. |

Table S4 Environmental Variables

| Group          | LayerName   | Layer Description                                          | Units           | Type  | Original Resolution | Reference/ source                              |
|----------------|-------------|------------------------------------------------------------|-----------------|-------|---------------------|------------------------------------------------|
| Climate/Water  | cw_precipdq | Precipitation of Driest Quarter (bio17)                    | mm              | float | 1 sec               | Xu T. and Hutchinson M. (2011). Generated OEH. |
| Climate/Water  | cw_precipwq | Precipitation of Warmest Quarter (bio18)                   | mm              | float | 1 sec               | Xu T. and Hutchinson M. (2011). Generated OEH. |
| Climate/Water  | cw_precipcq | Precipitation of Coldest Quarter (bio19)                   | mm              | float | 1 sec               | Xu T. and Hutchinson M. (2011). Generated OEH. |
| Climate/Energy | ce_radann   | Annual Mean Radiation (bio20)                              | Wm <sup>2</sup> | float | 1 sec               | Xu T. and Hutchinson M. (2011). Generated OEH. |
| Climate/Energy | ce_radhp    | Highest Period Radiation (bio21)                           | Wm <sup>2</sup> | float | 1 sec               | Xu T. and Hutchinson M. (2011). Generated OEH. |
| Climate/Energy | ce_radlp    | Lowest Period Radiation (bio22)                            | Wm <sup>2</sup> | float | 1 sec               | Xu T. and Hutchinson M. (2011). Generated OEH. |
| Climate/Energy | ce_radseas  | Radiation of Seasonality: Coefficient of Variation (bio23) | C of V          | float | 1 sec               | Xu T. and Hutchinson M. (2011). Generated OEH. |
| Climate/Energy | ce_radwetq  | Radiation of Wettest Quarter (bio24)                       | Wm <sup>2</sup> | float | 1 sec               | Xu T. and Hutchinson M. (2011). Generated OEH. |
| Climate/Energy | ce_raddq    | Radiation of Driest Quarter (bio25)                        | Wm <sup>2</sup> | float | 1 sec               | Xu T. and Hutchinson M. (2011). Generated OEH. |
| Climate/Energy | ce_radwq    | Radiation of Warmest Quarter (bio26)                       | Wm <sup>2</sup> | float | 1 sec               | Xu T. and Hutchinson M. (2011). Generated OEH. |
| Climate/Energy | ce_radcq    | Radiation of Coldest Quarter (bio27)                       | Wm <sup>2</sup> | float | 1 sec               | Xu T. and Hutchinson M. (2011). Generated OEH. |
| Climate/Temp   | ct_tempiso  | Isothermality 2/7 (bio3)                                   | unitless        | float | 1 sec               | Xu T. and Hutchinson M. (2011). Generated OEH. |

Table S4 Environmental Variables

| Group         | LayerName       | Layer Description                                             | Units  | Type    | Original Resolution | Reference/ source                              |
|---------------|-----------------|---------------------------------------------------------------|--------|---------|---------------------|------------------------------------------------|
| Climate/Temp  | ct_temptmcp     | Min Temperature of Coldest Period (bio6)                      | °C     | float   | 1 sec               | Xu T. and Hutchinson M. (2011). Generated OEH. |
| Climate/Temp  | ct_temptmtp     | Max Temperature of Warmest Period (bio5)                      | °C     | float   | 1 sec               | Xu T. and Hutchinson M. (2011). Generated OEH. |
| Climate/Temp  | ct_tempscas     | Temperature Seasonality: Coefficient of Variation (bio4)      | C of V | float   | 1 sec               | Xu T. and Hutchinson M. (2011). Generated OEH. |
| Climate/Temp  | ct_temptwarmq   | Mean Temperature of Warmest Quarter (bio10)                   | °C     | float   | 1 sec               | Xu T. and Hutchinson M. (2011). Generated OEH. |
| Climate/Temp  | ct_temptwetq    | Mean Temperature of Wettest Quarter (bio8)                    | °C     | float   | 1 sec               | Xu T. and Hutchinson M. (2011). Generated OEH. |
| Climate/Water | cw_etaaann      | Average areal actual evapotranspiration - Annual              | mm     | float   | 3 sec (~ 90 m)      | BOM                                            |
| Climate/Water | cw_etapann      | Average areal potential evapotranspiration - Annual           | mm     | float   | 3 sec (~ 90 m)      | BOM                                            |
| Climate/Water | cw_rainspr      | Average Rainfall - Spring                                     | mm     | float   | 3 sec (~ 90 m)      | BOM                                            |
| Climate/Water | cw_rainsum      | Average Rainfall - Summer                                     | mm     | float   | 3 sec (~ 90 m)      | BOM                                            |
| Climate/Water | cw_rainwin      | Average Rainfall - Winter                                     | mm     | float   | 3 sec (~ 90 m)      | BOM                                            |
| Climate/Water | cw_prescott     | Prescott Index                                                | index  | float   | 3 sec (~ 90 m)      | Soil and Landscape Grid of Australia           |
| Climate/Water | cw_rain1mm      | Average Number of days with rainfall greater than 1mm Annual  | mm     | float   | 3 sec (~ 90 m)      | BOM                                            |
| Climate/Water | cw_rain_sumwinr | Average Rainfall - Summer Winter Ratio                        | mm     | float   | 3 sec (~ 90 m)      | Soil and Landscape Grid of Australia           |
| Drainage      | dl_strmdstall   | Euclidean distance to all streams (i.e. all orders: 1 to 9)   | m      | integer | 30 m                | NSW Office of Water. Derived OEH               |
| Drainage      | dl_strmdstge2   | Euclidean distance to 2 <sup>nd</sup> order streams and above | m      | integer | 30 m                | NSW Office of Water. Derived OEH               |
| Drainage      | dl_strmdstge4   | Euclidean distance to 4 <sup>th</sup> order streams and above | m      | integer | 30 m                | NSW Office of Water. Derived OEH               |

Table S4 Environmental Variables

| Group    | LayerName       | Layer Description                                                                                                                                                                                                                                                                          | Units   | Type    | Original Resolution | Reference/ source                |
|----------|-----------------|--------------------------------------------------------------------------------------------------------------------------------------------------------------------------------------------------------------------------------------------------------------------------------------------|---------|---------|---------------------|----------------------------------|
| Drainage | dl_strmdstge6   | Euclidean distance to 6 <sup>th</sup> order streams and above                                                                                                                                                                                                                              | m       | integer | 30 m                | NSW Office of Water. Derived OEH |
| Location | dl_lat_grid     | Latitude (surrogate for location, dispersal, isolation)                                                                                                                                                                                                                                    | degrees | float   | 30 m                | OEH                              |
| Location | dl_long_grid    | Longitude (surrogate for location, dispersal, isolation)                                                                                                                                                                                                                                   | degrees | float   | 30 m                | OEH                              |
| RS       | sfc             | Seasonal Fractional Cover representing proportions of green (g), bare (b), and non-green or senescent (b). Derived from Landsat imagery over the period of 1998 to 2012, for each season (summer, winter, spring and autumn) and for 5th, 50th and 95th percentiles. A total of 36 layers. | % cover | float   | 30 m                | OEH                              |
| RS       | rs_fpc          | Foliage projective cover or the percentage of ground cover occupied by the vertical projection of foliage. Predicted using a time series of SPOT images between 2008-2011                                                                                                                  | %       | float   | 30 m                | OEH                              |
| RS       | rs_waterobs     | Water occurrences as observed through Landsat imagery for a 25 year period.                                                                                                                                                                                                                | count   | float   | 30 m                | OEH                              |
| RS       | rs_euc_waterobs | Euclidean distance to water observations                                                                                                                                                                                                                                                   | m       | float   | 30 m                | OEH                              |

## References

- Ashcroft, M.B. and Gollan, J.R., 2012. Fine-resolution (25 m) topoclimatic grids of near-surface (5 cm) extreme temperatures and humidities across various habitats in a large (200× 300 km) and diverse region. *International Journal of Climatology*, 32(14), pp.2134-2148.
- Australian Bureau of Meteorology <http://www.bom.gov.au/>
- NSW Office of Environment and Heritage (2017), The NSW State Vegetation Type Map: Methodology for a regional- scale map of NSW plant community types, NSW Office of Environment and Heritage, Sydney, Australia. ISBN 978-1-76039-729-6 OEH 2017/0134. March 2017. <http://www.environment.nsw.gov.au> [10 May 2018]
- Soil and Landscape Grid of Australia <https://www.clw.csiro.au/aclep/soilandlandscapegrid/>
- Viscarra Rossel, R.A., 2011. Fine-resolution multiscale mapping of clay minerals in Australian soils measured with near infrared spectra. *Journal of Geophysical Research: Earth Surface*, 116(F4).
- Wilford, J., 2012. A weathering intensity index for the Australian continent using airborne gamma-ray spectrometry and digital terrain analysis. *Geoderma*, 183, pp.124-142.
- Xu, T. and Hutchinson, M., 2011. ANUCLIM 6.1. *Australian National University, Canberra*.
