# Supplementary material
Source: MDPI journal article supplement (https://www.mdpi.com/2073-4441/12/3/651)
Supplement: s1 [file s1]

Archive with 4 entries (4 files):
- Table S1 .pdf
- Table S2 .pdf
- Table S3 .pdf
- Table S4 .pdf
