# Supplementary material
Source: MDPI journal article supplement (https://www.mdpi.com/2073-4441/12/3/651)
Supplement: s1 [file s1 › Table S2 .pdf]

Table S2 Cities and freshwater reptiles

Table S2: Freshwater reptiles observed in cities of the world with a population greater than 100,000

World's cities that had a population greater than 100,000 in May 2018 (Maxmind. Free World Cities Database. <http://www.maxmind.com>). Regional richness (column 4) refers to the total number of the freshwater reptile species observed (2013-2018) within the FEOW region containing the city. The last five columns contain the number of freshwater species observed within 50 km of the centre of each city.

| City          | Country | Freshwater Ecoregions of the World (FEOW) Region | Regional richness | Longitude    | Latitude   | Population | # of freshwater reptile species within 50 km of city centre |                     |               |                |             |
|---------------|---------|--------------------------------------------------|-------------------|--------------|------------|------------|-------------------------------------------------------------|---------------------|---------------|----------------|-------------|
|               |         |                                                  |                   |              |            |            | Lizard species                                              | Crocodilian species | Snake species | Turtle species | All species |
| a coruna      | es      | Cantabric Coast - Languedoc                      | 10                | -8.4068120   | 43.3666090 | 236010     | 0                                                           | 0                   | 0             | 1              | 1           |
| aachen        | de      | Central & Western Europe                         | 13                | 6.1052780    | 50.7708330 | 251104     | 0                                                           | 0                   | 0             | 5              | 5           |
| aalborg       | dk      | Central & Western Europe                         | 13                | 9.9411630    | 57.0354980 | 122219     | 0                                                           | 0                   | 0             | 0              | 0           |
| aba           | ng      | Niger Delta                                      | 0                 | 7.3666670    | 5.1065760  | 897613     | 0                                                           | 0                   | 0             | 0              | 0           |
| abadan        | ir      | Lower Tigris & Euphrates                         | 1                 | 48.3043000   | 30.3392000 | 370220     | 0                                                           | 0                   | 0             | 1              | 1           |
| abakaliki     | ng      | Northern Gulf of Guinea Drainages - Bioko        | 1                 | 8.1169080    | 6.3162490  | 134113     | 0                                                           | 0                   | 0             | 0              | 0           |
| abakan        | ru      | Yenisei                                          | 0                 | 91.4291670   | 53.7155560 | 167291     | 0                                                           | 0                   | 0             | 0              | 0           |
| abbotsford    | ca      | Alaska & Canada Pacific Coastal                  | 4                 | -122.3000000 | 49.0500000 | 151685     | 0                                                           | 0                   | 0             | 2              | 2           |
| abengourou    | ci      | Eburneo                                          | 0                 | -3.4963890   | 6.7297220  | 144074     | 0                                                           | 0                   | 0             | 0              | 0           |
| abeokuta      | ng      | Bight Drainages                                  | 7                 | 3.3500000    | 7.1500000  | 593140     | 0                                                           | 0                   | 0             | 0              | 0           |
| aberdeen      | gb      | Northern British Isles                           | 1                 | -2.1000000   | 57.1333330 | 183791     | 0                                                           | 0                   | 0             | 0              | 0           |
| abha          | sa      | Arabian Interior                                 | 1                 | 42.5052780   | 18.2163890 | 142255     | 0                                                           | 0                   | 0             | 0              | 0           |
| abidjan       | ci      | Eburneo                                          | 0                 | -4.0126560   | 5.3096570  | 3692570    | 0                                                           | 0                   | 0             | 0              | 0           |
| abiko         | jp      | Honshu - Shikoku - Kyushu                        | 5                 | 140.0166670  | 35.8666670 | 131774     | 0                                                           | 0                   | 0             | 3              | 3           |
| abilene       | us      | East Texas Gulf                                  | 34                | -99.7327778  | 32.4486111 | 114247     | 0                                                           | 0                   | 0             | 4              | 4           |
| abohar        | in      | Lower & Middle Indus                             | 2                 | 74.1833330   | 30.1500000 | 130613     | 0                                                           | 0                   | 0             | 0              | 0           |
| abomey-calavi | bj      | Bight Drainages                                  | 7                 | 2.3500000    | 6.4500000  | 385823     | 1                                                           | 2                   | 2             | 1              | 6           |
| abu dhabi     | ae      | Oman Mountains                                   | 0                 | 54.3666670   | 24.4666670 | 603687     | 0                                                           | 0                   | 0             | 0              | 0           |
| abuja         | ng      | Lower Niger - Benue                              | 2                 | 7.1793270    | 9.1805150  | 174152     | 0                                                           | 0                   | 0             | 0              | 0           |

Table S2 Cities and freshwater reptiles

| City           | Country | Freshwater Ecoregions of the World (FEOW) Region | Regional richness | Longitude    | Latitude    | Population | # of freshwater reptile species within 50 km of city centre |                     |               |                |             |
|----------------|---------|--------------------------------------------------|-------------------|--------------|-------------|------------|-------------------------------------------------------------|---------------------|---------------|----------------|-------------|
|                |         |                                                  |                   |              |             |            | Lizard species                                              | Crocodilian species | Snake species | Turtle species | All species |
| acapulco       | mx      | Sierra Madre del Sur                             | 12                | -99.9166670  | 16.8500000  | 652160     | 1                                                           | 0                   | 0             | 1              | 2           |
| acarigua       | ve      | Orinoco Piedmont                                 | 10                | -69.2019444  | 9.5597222   | 143739     | 0                                                           | 0                   | 0             | 0              | 0           |
| accra          | gh      | Ashanti                                          | 1                 | -0.2166667   | 5.5500000   | 1963460    | 0                                                           | 0                   | 0             | 0              | 0           |
| achalpur       | in      | Namuda - Tapi                                    | 1                 | 77.5086110   | 21.2572220  | 111287     | 0                                                           | 0                   | 0             | 0              | 0           |
| acheng         | cn      | Songhua Jiang                                    | 0                 | 126.9770310  | 45.5454520  | 144665     | 0                                                           | 0                   | 0             | 0              | 0           |
| achinsk        | ru      | Ob                                               | 0                 | 90.4993000   | 56.2694000  | 117635     | 0                                                           | 0                   | 0             | 0              | 0           |
| acuna          | mx      | Lower Rio Grande - Bravo                         | 14                | -100.9166670 | 29.3000000  | 144703     | 0                                                           | 0                   | 0             | 4              | 4           |
| adana          | tr      | Southern Anatolia                                | 2                 | 35.3288890   | 37.0016670  | 1249680    | 0                                                           | 0                   | 0             | 0              | 0           |
| addis abeba    | et      | Ethiopian Highlands                              | 1                 | 38.7492260   | 9.0243250   | 2757807    | 0                                                           | 0                   | 0             | 0              | 0           |
| adelaide       | au      | Murray - Darling                                 | 11                | 138.5986330  | -34.9286610 | 1074168    | 1                                                           | 0                   | 1             | 2              | 4           |
| aden           | ye      | Southwestern Arabian Coast                       | 1                 | 45.0366667   | 12.7794444  | 550744     | 0                                                           | 0                   | 0             | 0              | 0           |
| adilabad       | in      | Northern Deccan Plateau                          | 2                 | 78.5333330   | 19.6666670  | 118539     | 0                                                           | 0                   | 0             | 0              | 0           |
| adiwerna       | id      | Central & Eastern Java                           | 4                 | 109.1325000  | -6.9375000  | 134202     | 0                                                           | 0                   | 0             | 0              | 0           |
| adoni          | in      | Southern Deccan Plateau                          | 0                 | 77.2833330   | 15.6333330  | 163649     | 0                                                           | 0                   | 0             | 0              | 0           |
| afyonkarahisar | tr      | Central Anatolia                                 | 2                 | 30.5433330   | 38.7566670  | 146211     | 0                                                           | 0                   | 0             | 0              | 0           |
| agadir         | ma      | Atlantic Northwest Africa                        | 3                 | -9.5931610   | 30.4206640  | 656110     | 0                                                           | 0                   | 0             | 1              | 1           |
| agartala       | in      | Ganges Delta & Plain                             | 13                | 91.2750000   | 23.8363890  | 203292     | 0                                                           | 0                   | 0             | 0              | 0           |
| agboville      | ci      | Eburneo                                          | 0                 | -4.2131860   | 5.9280100   | 108684     | 0                                                           | 0                   | 0             | 0              | 0           |
| ageo           | jp      | Honshu - Shikoku - Kyushu                        | 5                 | 139.5886110  | 35.9697220  | 219405     | 0                                                           | 0                   | 0             | 3              | 3           |
| agra           | in      | Ganges Delta & Plain                             | 13                | 78.0166670   | 27.1833330  | 1430194    | 0                                                           | 1                   | 0             | 1              | 2           |
| aguascalientes | mx      | Rio Santiago                                     | 13                | -102.3000000 | 21.8833330  | 658193     | 0                                                           | 0                   | 0             | 2              | 2           |
| ahmadabad      | in      | Namuda - Tapi                                    | 1                 | 72.6166670   | 23.0333330  | 3719933    | 0                                                           | 0                   | 0             | 0              | 0           |
| ahmadnagar     | in      | Southern Deccan Plateau                          | 0                 | 74.7333330   | 19.0833330  | 367168     | 0                                                           | 0                   | 0             | 0              | 0           |
| ahmadpur east  | pk      | Lower & Middle Indus                             | 2                 | 71.2597570   | 29.1430920  | 116613     | 0                                                           | 0                   | 0             | 0              | 0           |
| ahvaz          | ir      | Lower Tigris & Euphrates                         | 1                 | 48.6693000   | 31.3203000  | 854980     | 0                                                           | 0                   | 0             | 0              | 0           |

Table S2 Cities and freshwater reptiles

| City              | Country | Freshwater Ecoregions of the World (FEOW) Region | Regional richness | Longitude    | Latitude    | Population | # of freshwater reptile species within 50 km of city centre |                     |               |                |             |
|-------------------|---------|--------------------------------------------------|-------------------|--------------|-------------|------------|-------------------------------------------------------------|---------------------|---------------|----------------|-------------|
|                   |         |                                                  |                   |              |             |            | Lizard species                                              | Crocodilian species | Snake species | Turtle species | All species |
| aix-en-provence   | fr      | Cantabric Coast - Languedoc                      | 10                | 5.4487910    | 43.5286950  | 142133     | 0                                                           | 0                   | 0             | 2              | 2           |
| aizawl            | in      | Chin Hills - Arakan Coast                        | 3                 | 92.7175000   | 23.7244440  | 265353     | 0                                                           | 0                   | 0             | 0              | 0           |
| ajdabiya          | ly      | Sahara                                           | 1                 | 20.2230556   | 30.7591667  | 134357     | 0                                                           | 0                   | 0             | 0              | 0           |
| ajmer             | in      | Lower & Middle Indus                             | 2                 | 74.6333330   | 26.4500000  | 517947     | 0                                                           | 0                   | 0             | 0              | 0           |
| akashi            | jp      | Honshu - Shikoku - Kyushu                        | 5                 | 134.9833330  | 34.6333330  | 297281     | 0                                                           | 0                   | 0             | 1              | 1           |
| akishima          | jp      | Honshu - Shikoku - Kyushu                        | 5                 | 139.3799910  | 35.7208480  | 107926     | 0                                                           | 0                   | 0             | 3              | 3           |
| akita             | jp      | Honshu - Shikoku - Kyushu                        | 5                 | 140.1166670  | 39.7166670  | 320071     | 0                                                           | 0                   | 0             | 0              | 0           |
| akola             | in      | Namuda - Tapi                                    | 1                 | 77.0000000   | 20.7333330  | 428892     | 0                                                           | 0                   | 0             | 0              | 0           |
| akron             | us      | Laurentian Great Lakes                           | 16                | -81.5191667  | 41.0813889  | 208414     | 0                                                           | 0                   | 0             | 8              | 8           |
| aksaray           | tr      | Central Anatolia                                 | 2                 | 34.0253700   | 38.3725500  | 152281     | 0                                                           | 0                   | 0             | 0              | 0           |
| aksu              | cn      | Tarim                                            | 0                 | 80.2644440   | 41.1230560  | 340020     | 0                                                           | 0                   | 0             | 0              | 0           |
| aktau             | kz      | Turan Plain                                      | 1                 | 51.2000000   | 43.6500000  | 187700     | 0                                                           | 0                   | 0             | 0              | 0           |
| akure             | ng      | Bight Drainages                                  | 7                 | 5.1931180    | 7.2525600   | 420623     | 0                                                           | 0                   | 0             | 0              | 0           |
| akyab             | mm      | Chin Hills - Arakan Coast                        | 3                 | 92.9000000   | 20.1500000  | 177765     | 0                                                           | 0                   | 0             | 0              | 0           |
| alagoinhas        | br      | Northeastern Mata Atlantica                      | 1                 | -38.4333330  | -12.1166670 | 122692     | 0                                                           | 0                   | 0             | 0              | 0           |
| alandur           | in      | Southeastern Ghats                               | 3                 | 80.2061110   | 13.0025000  | 153789     | 0                                                           | 2                   | 0             | 0              | 2           |
| alanya            | tr      | Southern Anatolia                                | 2                 | 31.9998170   | 36.5437470  | 113027     | 0                                                           | 0                   | 0             | 0              | 0           |
| alappuzha         | in      | Western Ghats                                    | 4                 | 76.3275000   | 9.4941670   | 176799     | 0                                                           | 0                   | 0             | 0              | 0           |
| albacete          | es      | Eastern Iberia                                   | 13                | -1.8577730   | 38.9958450  | 155083     | 0                                                           | 0                   | 0             | 1              | 1           |
| alberton          | za      | Southern Temperate Highveld                      | 5                 | 28.1405950   | -26.2652070 | 202503     | 0                                                           | 1                   | 1             | 1              | 3           |
| albuquerque       | us      | Upper Rio Grande - Bravo                         | 8                 | -106.6505556 | 35.0844444  | 487378     | 0                                                           | 0                   | 0             | 5              | 5           |
| albury            | au      | Murray - Darling                                 | 11                | 146.9239350  | -36.0749400 | 104261     | 1                                                           | 0                   | 1             | 2              | 4           |
| alcala de henares | es      | Western Iberia                                   | 6                 | -3.3599570   | 40.4820480  | 195152     | 0                                                           | 0                   | 0             | 3              | 3           |
| alcobendas        | es      | Western Iberia                                   | 6                 | -3.6356880   | 40.5439330  | 101860     | 0                                                           | 0                   | 0             | 3              | 3           |
| alcorcon          | es      | Western Iberia                                   | 6                 | -3.8124530   | 40.3464670  | 169343     | 0                                                           | 0                   | 0             | 3              | 3           |

Table S2 Cities and freshwater reptiles

| City        | Country | Freshwater Ecoregions of the World (FEOW) Region   | Regional richness | Longitude    | Latitude   | Population | # of freshwater reptile species within 50 km of city centre |                     |               |                |             |
|-------------|---------|----------------------------------------------------|-------------------|--------------|------------|------------|-------------------------------------------------------------|---------------------|---------------|----------------|-------------|
|             |         |                                                    |                   |              |            |            | Lizard species                                              | Crocodilian species | Snake species | Turtle species | All species |
| aleppo      | sy      | Upper Tigris & Euphrates                           | 3                 | 37.1586111   | 36.2027778 | 2139878    | 0                                                           | 0                   | 0             | 0              | 0           |
| alexandria  | us      | Chesapeake Bay                                     | 19                | -77.0472222  | 38.8047222 | 127273     | 0                                                           | 0                   | 0             | 13             | 13          |
| alexandria  | eg      | Nile Delta                                         | 0                 | 29.9191667   | 31.1980556 | 3811512    | 0                                                           | 0                   | 0             | 13             | 13          |
| algeciras   | es      | Southern Iberia                                    | 8                 | -5.4505110   | 36.1332570 | 104766     | 0                                                           | 0                   | 0             | 3              | 3           |
| algiers     | dz      | Mediterranean Northwest Africa                     | 2                 | 3.0505556    | 36.7630556 | 1980242    | 0                                                           | 0                   | 0             | 0              | 0           |
| aligarh     | in      | Ganges Delta & Plain                               | 13                | 78.0833330   | 27.8833330 | 753280     | 0                                                           | 0                   | 0             | 0              | 0           |
| allahabad   | in      | Ganges Delta & Plain                               | 13                | 81.8500000   | 25.4500000 | 1073544    | 0                                                           | 0                   | 0             | 0              | 0           |
| allentown   | us      | Northeast US & Southeast Canada Atlantic Drainages | 18                | -75.4905556  | 40.6083333 | 105519     | 0                                                           | 0                   | 0             | 7              | 7           |
| almaty      | kz      | Balkash - Alakul                                   | 0                 | 76.9500000   | 43.2500000 | 1204820    | 0                                                           | 0                   | 0             | 0              | 0           |
| almere      | nl      | Central & Western Europe                           | 13                | 5.2353950    | 52.3881010 | 186457     | 0                                                           | 0                   | 0             | 0              | 0           |
| almeria     | es      | Southern Iberia                                    | 8                 | -2.4500000   | 36.8333330 | 181497     | 0                                                           | 0                   | 0             | 1              | 1           |
| almet'yevsk | ru      | Volga - Ural                                       | 0                 | 52.3153970   | 54.9044240 | 142727     | 0                                                           | 0                   | 0             | 0              | 0           |
| alor setar  | my      | Northern Central Sumatra - Western Malaysia        | 7                 | 100.3601370  | 6.1210450  | 217378     | 0                                                           | 0                   | 0             | 0              | 0           |
| altay       | cn      | Upper Irtysh                                       | 0                 | 88.1166670   | 47.8666670 | 139341     | 0                                                           | 0                   | 0             | 0              | 0           |
| alwar       | in      | Ganges Delta & Plain                               | 13                | 76.6000000   | 27.5666670 | 283248     | 0                                                           | 0                   | 0             | 0              | 0           |
| amadora     | pt      | Western Iberia                                     | 6                 | -9.2397080   | 38.7597110 | 178856     | 0                                                           | 0                   | 0             | 3              | 3           |
| amagasaki   | jp      | Honshu - Shikoku - Kyushu                          | 5                 | 135.4166670  | 34.7166670 | 442176     | 0                                                           | 0                   | 0             | 2              | 2           |
| amaigbo     | ng      | Northern Gulf of Guinea Drainages - Bioko          | 1                 | 7.8382940    | 5.7891710  | 127309     | 0                                                           | 0                   | 0             | 0              | 0           |
| amarillo    | us      | US Southern Plains                                 | 20                | -101.8308333 | 35.2219444 | 181766     | 0                                                           | 0                   | 0             | 3              | 3           |
| ambala      | in      | Lower & Middle Indus                               | 2                 | 76.7808330   | 30.3783330 | 146797     | 0                                                           | 0                   | 0             | 0              | 0           |
| ambarnath   | in      | Western Ghats                                      | 4                 | 73.1666670   | 19.2000000 | 217778     | 0                                                           | 0                   | 0             | 0              | 0           |
| ambato      | ec      | Amazonas High Andes                                | 1                 | -78.6166667  | -1.2500000 | 154369     | 0                                                           | 0                   | 0             | 0              | 0           |
| ambattur    | in      | Southeastern Ghats                                 | 3                 | 80.0886110   | 13.0766670 | 341078     | 0                                                           | 1                   | 0             | 0              | 1           |
| ambon       | id      | Malukku                                            | 1                 | 128.1814050  | -3.6954260 | 355607     | 0                                                           | 0                   | 0             | 0              | 0           |

Table S2 Cities and freshwater reptiles

| City           | Country | Freshwater Ecoregions of the World (FEOW) Region | Regional richness | Longitude    | Latitude    | Population | # of freshwater reptile species within 50 km of city centre |                     |               |                |             |
|----------------|---------|--------------------------------------------------|-------------------|--------------|-------------|------------|-------------------------------------------------------------|---------------------|---------------|----------------|-------------|
|                |         |                                                  |                   |              |             |            | Lizard species                                              | Crocodilian species | Snake species | Turtle species | All species |
| ambur          | in      | Southeastern Ghats                               | 3                 | 78.7000000   | 12.7833330  | 109883     | 0                                                           | 0                   | 0             | 0              | 0           |
| americana      | br      | Upper Parana                                     | 3                 | -47.3344440  | -22.7402780 | 196026     | 0                                                           | 1                   | 0             | 1              | 2           |
| amersfoort     | nl      | Central & Western Europe                         | 13                | 5.3895260    | 52.1560220  | 139208     | 0                                                           | 0                   | 0             | 0              | 0           |
| amiens         | fr      | Central & Western Europe                         | 13                | 2.3000000    | 49.9000000  | 138816     | 0                                                           | 0                   | 0             | 0              | 0           |
| amol           | ir      | Kura - South Caspian Drainages                   | 4                 | 52.3507240   | 36.4696120  | 199398     | 0                                                           | 0                   | 0             | 0              | 0           |
| amravati       | in      | Namuda - Tapi                                    | 1                 | 77.7500000   | 20.9333330  | 603885     | 0                                                           | 0                   | 0             | 0              | 0           |
| amritsar       | in      | Lower & Middle Indus                             | 2                 | 74.8655560   | 31.6330560  | 1092528    | 0                                                           | 0                   | 0             | 0              | 0           |
| amroha         | in      | Ganges Delta & Plain                             | 13                | 78.4666670   | 28.9166670  | 176271     | 0                                                           | 0                   | 0             | 0              | 0           |
| amsterdam      | nl      | Central & Western Europe                         | 13                | 4.9166670    | 52.3500000  | 745811     | 0                                                           | 0                   | 0             | 0              | 0           |
| anaco          | ve      | South America Caribbean Drainages - Trinidad     | 6                 | -64.4730556  | 9.4375000   | 117605     | 0                                                           | 0                   | 0             | 0              | 0           |
| anaheim        | us      | Southern California Coastal - Baja California    | 12                | -117.9136111 | 33.8352778  | 333689     | 0                                                           | 0                   | 0             | 7              | 7           |
| anand          | in      | Namuda - Tapi                                    | 1                 | 72.9333330   | 22.5666670  | 138018     | 0                                                           | 1                   | 0             | 0              | 1           |
| ananindeua     | br      | Amazonas Estuary & Coastal Drainages             | 0                 | -48.3833330  | -1.3666670  | 433956     | 0                                                           | 0                   | 0             | 0              | 0           |
| anantapur      | in      | Southern Deccan Plateau                          | 0                 | 77.6000000   | 14.6833330  | 240469     | 0                                                           | 0                   | 0             | 0              | 0           |
| anapolis       | br      | Upper Parana                                     | 3                 | -48.9666670  | -16.3333330 | 319592     | 0                                                           | 0                   | 0             | 0              | 0           |
| anbu           | cn      | Coastal Fujian - Zeijang                         | 1                 | 116.6809160  | 23.4489530  | 162964     | 0                                                           | 0                   | 0             | 0              | 0           |
| anchorage      | us      | Alaska & Canada Pacific Coastal                  | 4                 | -149.9002778 | 61.2180556  | 276263     | 0                                                           | 0                   | 0             | 0              | 0           |
| ancona         | it      | Gulf of Venice Drainages                         | 8                 | 13.5000000   | 43.6333330  | 100982     | 0                                                           | 0                   | 0             | 1              | 1           |
| anda           | cn      | Songhua Jiang                                    | 0                 | 125.3166670  | 46.4000000  | 181271     | 0                                                           | 0                   | 0             | 0              | 0           |
| andijon        | uz      | Northern Central Asian Highlands                 | 1                 | 72.3575000   | 40.6541667  | 318439     | 0                                                           | 0                   | 0             | 0              | 0           |
| angarsk        | ru      | Yenisei                                          | 0                 | 103.8863890  | 52.5366670  | 243161     | 0                                                           | 0                   | 0             | 0              | 0           |
| angeles        | ph      | Northern Philippine Islands                      | 1                 | 120.5910000  | 15.1406000  | 298948     | 0                                                           | 0                   | 0             | 0              | 0           |
| angers         | fr      | Central & Western Europe                         | 13                | -0.5477400   | 47.4738060  | 158585     | 0                                                           | 0                   | 0             | 1              | 1           |
| angra dos reis | br      | Ribeira de Iguape                                | 1                 | -44.3000000  | -23.0000000 | 153637     | 0                                                           | 0                   | 0             | 0              | 0           |

Table S2 Cities and freshwater reptiles

| City         | Country | Freshwater Ecoregions of the World (FEOW) Region | Regional richness | Longitude    | Latitude    | Population | # of freshwater reptile species within 50 km of city centre |                     |               |                |             |
|--------------|---------|--------------------------------------------------|-------------------|--------------|-------------|------------|-------------------------------------------------------------|---------------------|---------------|----------------|-------------|
|              |         |                                                  |                   |              |             |            | Lizard species                                              | Crocodilian species | Snake species | Turtle species | All species |
| angren       | uz      | Northern Central Asian Highlands                 | 1                 | 70.1436111   | 41.0166667  | 126962     | 0                                                           | 0                   | 0             | 0              | 0           |
| anjo         | jp      | Honshu - Shikoku - Kyushu                        | 5                 | 137.0833330  | 34.9500000  | 168664     | 0                                                           | 0                   | 0             | 2              | 2           |
| ankang       | cn      | Lower Yangtze                                    | 4                 | 109.0172220  | 32.6800000  | 132654     | 0                                                           | 0                   | 0             | 0              | 0           |
| ankara       | tr      | Northern Anatolia                                | 2                 | 32.8403050   | 39.9116520  | 3519177    | 0                                                           | 0                   | 0             | 0              | 0           |
| ann arbor    | us      | Laurentian Great Lakes                           | 16                | -83.7263889  | 42.2708333  | 113810     | 0                                                           | 0                   | 0             | 8              | 8           |
| anqing       | cn      | Lower Yangtze                                    | 4                 | 117.0505560  | 30.5091670  | 358661     | 0                                                           | 0                   | 0             | 0              | 0           |
| anqiu        | cn      | Lower Huang He                                   | 0                 | 119.1925000  | 36.4341670  | 105665     | 0                                                           | 0                   | 0             | 0              | 0           |
| anshan       | cn      | Liao He                                          | 0                 | 122.9900000  | 41.1236110  | 1199275    | 0                                                           | 0                   | 0             | 0              | 0           |
| anshun       | cn      | Xi Yang                                          | 15                | 105.9333330  | 26.2500000  | 351936     | 0                                                           | 0                   | 0             | 0              | 0           |
| antakya      | tr      | Orontes                                          | 0                 | 36.1572250   | 36.2065510  | 154881     | 0                                                           | 0                   | 0             | 0              | 0           |
| antalya      | tr      | Southern Anatolia                                | 2                 | 30.6955650   | 36.9081180  | 758603     | 0                                                           | 0                   | 0             | 0              | 0           |
| antananarivo | mg      | Northwestern Madagascar                          | 2                 | 47.5166667   | -18.9166667 | 1391506    | 0                                                           | 0                   | 0             | 0              | 0           |
| antioch      | us      | Sacramento - San Joaquin                         | 10                | -121.8047222 | 38.0050000  | 106038     | 0                                                           | 0                   | 0             | 4              | 4           |
| antipolo     | ph      | Northern Philippine Islands                      | 1                 | 121.1757000  | 14.5886000  | 549541     | 0                                                           | 0                   | 0             | 0              | 0           |
| antofagasta  | cl      | Atacama                                          | 0                 | -70.4000000  | -23.6500000 | 309835     | 0                                                           | 0                   | 0             | 0              | 0           |
| antsirabe    | mg      | Western Madagascar                               | 2                 | 47.0333333   | -19.8500000 | 182804     | 0                                                           | 0                   | 0             | 0              | 0           |
| antwerp      | be      | Central & Western Europe                         | 13                | 4.4166670    | 51.2166670  | 459805     | 0                                                           | 0                   | 0             | 2              | 2           |
| anyama       | ci      | Eburneo                                          | 0                 | -4.0518310   | 5.4946220   | 158250     | 0                                                           | 0                   | 0             | 0              | 0           |
| anyang       | cn      | Lower Huang He                                   | 0                 | 114.3288890  | 36.0994440  | 781129     | 0                                                           | 0                   | 0             | 0              | 0           |
| apeldoorn    | nl      | Central & Western Europe                         | 13                | 5.9666670    | 52.2166670  | 157763     | 0                                                           | 0                   | 0             | 0              | 0           |
| apodaca      | mx      | Rio San Juan (Mexico)                            | 8                 | -100.2000000 | 25.7666670  | 352246     | 0                                                           | 0                   | 0             | 4              | 4           |
| apopa        | sv      | Chiapas - Fonseca                                | 11                | -89.1791667  | 13.8072222  | 112157     | 1                                                           | 0                   | 0             | 1              | 2           |
| apucarana    | br      | Upper Parana                                     | 3                 | -51.4833330  | -23.5500000 | 107086     | 0                                                           | 0                   | 0             | 0              | 0           |
| aqtobe       | kz      | Volga - Ural                                     | 0                 | 57.1813890   | 50.2980560  | 262471     | 0                                                           | 0                   | 0             | 0              | 0           |

Table S2 Cities and freshwater reptiles

| City         | Country | Freshwater Ecoregions of the World (FEOW) Region | Regional richness | Longitude    | Latitude    | Population | # of freshwater reptile species within 50 km of city centre |                     |               |                |             |
|--------------|---------|--------------------------------------------------|-------------------|--------------|-------------|------------|-------------------------------------------------------------|---------------------|---------------|----------------|-------------|
|              |         |                                                  |                   |              |             |            | Lizard species                                              | Crocodilian species | Snake species | Turtle species | All species |
| ara          | in      | Ganges Delta & Plain                             | 13                | 84.6666670   | 25.5666670  | 223700     | 0                                                           | 0                   | 0             | 0              | 0           |
| aracaju      | br      | Northeastern Mata Atlantica                      | 1                 | -37.0666670  | -10.9166670 | 490184     | 0                                                           | 0                   | 0             | 0              | 0           |
| aracatuba    | br      | Upper Parana                                     | 3                 | -50.4166670  | -21.2000000 | 170028     | 0                                                           | 0                   | 0             | 0              | 0           |
| arad         | ro      | Dniester - Lower Danube                          | 3                 | 21.3166670   | 46.1833330  | 169067     | 0                                                           | 0                   | 0             | 0              | 0           |
| araguaina    | br      | Tocantins - Araguaia                             | 0                 | -48.0575000  | -7.1600000  | 114959     | 0                                                           | 0                   | 0             | 0              | 0           |
| arak         | ir      | Namak                                            | 3                 | 49.6891640   | 34.0917410  | 503673     | 0                                                           | 0                   | 0             | 0              | 0           |
| arapiraca    | br      | S. Francisco                                     | 0                 | -36.6500000  | -9.7500000  | 166566     | 0                                                           | 0                   | 0             | 0              | 0           |
| araraquara   | br      | Upper Parana                                     | 3                 | -48.1666670  | -21.7833330 | 185191     | 0                                                           | 0                   | 0             | 0              | 0           |
| araras       | br      | Upper Parana                                     | 3                 | -47.3833330  | -22.3666670 | 107465     | 0                                                           | 1                   | 0             | 1              | 2           |
| araruama     | br      | Fluminense                                       | 1                 | -42.3333330  | -22.8833330 | 109638     | 0                                                           | 0                   | 0             | 0              | 0           |
| araucaria    | br      | Iguassu                                          | 2                 | -49.4166670  | -25.5833330 | 111303     | 0                                                           | 0                   | 0             | 0              | 0           |
| ardabil      | ir      | Kura - South Caspian Drainages                   | 4                 | 48.2933000   | 38.2498000  | 410773     | 0                                                           | 0                   | 0             | 0              | 0           |
| arequipa     | pe      | Central Andean Pacific Slopes                    | 0                 | -71.5350000  | -16.3988889 | 844000     | 0                                                           | 0                   | 0             | 0              | 0           |
| arhus        | dk      | Central & Western Europe                         | 13                | 10.2255300   | 56.1534230  | 226716     | 0                                                           | 0                   | 0             | 0              | 0           |
| arica        | cl      | Atacama                                          | 0                 | -70.3041700  | -18.4750000 | 186000     | 0                                                           | 0                   | 0             | 0              | 0           |
| arjawinangun | id      | Southern Sumatra - Western Java                  | 8                 | 108.4102780  | -6.6452780  | 105852     | 0                                                           | 0                   | 0             | 0              | 0           |
| arkhangelsk  | ru      | Barents Sea Drainages                            | 0                 | 40.5433000   | 64.5401000  | 344603     | 0                                                           | 0                   | 0             | 0              | 0           |
| arlington    | us      | Chesapeake Bay                                   | 19                | -77.0844444  | 38.8902778  | 185360     | 0                                                           | 1                   | 1             | 14             | 16          |
| arlington    | us      | Sabine - Galveston                               | 29                | -97.1077778  | 32.7355556  | 367535     | 0                                                           | 1                   | 1             | 14             | 16          |
| armavir      | ru      | Kuban                                            | 0                 | 41.1234000   | 44.9892000  | 199551     | 0                                                           | 0                   | 0             | 0              | 0           |
| armenia      | co      | Magdalena - Sinu                                 | 15                | -75.6811110  | 4.5338890   | 315332     | 0                                                           | 0                   | 0             | 1              | 1           |
| arnhem       | nl      | Central & Western Europe                         | 13                | 5.9256360    | 51.9798180  | 144959     | 0                                                           | 0                   | 0             | 0              | 0           |
| arusha       | tz      | Pangani                                          | 1                 | 36.6833333   | -3.3666667  | 341155     | 0                                                           | 0                   | 0             | 0              | 0           |
| arvada       | us      | Middle Missouri                                  | 12                | -105.0869444 | 39.8027778  | 101732     | 0                                                           | 0                   | 0             | 5              | 5           |
| aryanah      | tn      | Mediterranean Northwest Africa                   | 2                 | 10.1933710   | 36.8601170  | 237401     | 0                                                           | 0                   | 0             | 0              | 0           |

Table S2 Cities and freshwater reptiles

| City         | Country | Freshwater Ecoregions of the World (FEOW) Region | Regional richness | Longitude   | Latitude    | Population | # of freshwater reptile species within 50 km of city centre |                     |               |                |             |
|--------------|---------|--------------------------------------------------|-------------------|-------------|-------------|------------|-------------------------------------------------------------|---------------------|---------------|----------------|-------------|
|              |         |                                                  |                   |             |             |            | Lizard species                                              | Crocodilian species | Snake species | Turtle species | All species |
| arzamas      | ru      | Volga - Ural                                     | 0                 | 43.8399200  | 55.3948520  | 109480     | 0                                                           | 0                   | 0             | 0              | 0           |
| asahikawa    | jp      | Sakhalin, Hokkaido, & Sikhote - Alin Coast       | 0                 | 142.3702780 | 43.7677780  | 356615     | 0                                                           | 0                   | 0             | 0              | 0           |
| asaka        | jp      | Honshu - Shikoku - Kyushu                        | 5                 | 139.6019440 | 35.8047220  | 128061     | 0                                                           | 0                   | 0             | 3              | 3           |
| asansol      | in      | Ganges Delta & Plain                             | 13                | 86.9833330  | 23.6833330  | 504320     | 0                                                           | 0                   | 0             | 0              | 0           |
| asfi         | ma      | Atlantic Northwest Africa                        | 3                 | -9.2371810  | 32.2993920  | 328883     | 0                                                           | 0                   | 0             | 0              | 0           |
| asgabat      | tm      | Middle Amu Darya                                 | 1                 | 58.3833333  | 37.9500000  | 797900     | 0                                                           | 0                   | 0             | 0              | 0           |
| ashdod       | il      | Coastal Levant                                   | 1                 | 34.6559440  | 31.7360560  | 202681     | 0                                                           | 0                   | 0             | 0              | 0           |
| ashdod       | il      | Coastal Levant                                   | 1                 | 34.6496560  | 31.7921330  | 202681     | 0                                                           | 0                   | 0             | 0              | 0           |
| ashikaga     | jp      | Honshu - Shikoku - Kyushu                        | 5                 | 139.4500000 | 36.3333330  | 159673     | 0                                                           | 0                   | 0             | 0              | 0           |
| ashqelon     | il      | Coastal Levant                                   | 1                 | 34.5714900  | 31.6692560  | 108342     | 0                                                           | 0                   | 0             | 0              | 0           |
| asmara       | er      | Western Red Sea Drainages                        | 0                 | 38.9333333  | 15.3333333  | 563948     | 0                                                           | 0                   | 0             | 0              | 0           |
| astana       | kz      | Ob                                               | 0                 | 71.4277780  | 51.1811110  | 345621     | 0                                                           | 0                   | 0             | 0              | 0           |
| astanajapura | id      | Southern Sumatra - Western Java                  | 8                 | 108.6311000 | -6.8017000  | 148055     | 0                                                           | 0                   | 0             | 0              | 0           |
| astrakhan    | ru      | Volga Delta - Northern Caspian Drainages         | 0                 | 48.0407560  | 46.3496830  | 502537     | 0                                                           | 0                   | 0             | 0              | 0           |
| asuncion     | py      | Chaco                                            | 3                 | -57.6666670 | -25.2666670 | 508797     | 0                                                           | 0                   | 0             | 0              | 0           |
| aswan        | eg      | Lower Nile                                       | 1                 | 32.8988889  | 24.0875000  | 241282     | 0                                                           | 1                   | 0             | 0              | 1           |
| asyut        | eg      | Lower Nile                                       | 1                 | 31.1827778  | 27.1827778  | 420614     | 0                                                           | 1                   | 0             | 0              | 1           |
| athens       | gr      | Aegean Drainages                                 | 3                 | 23.7333333  | 37.9833333  | 729139     | 0                                                           | 0                   | 0             | 2              | 2           |
| atibaia      | br      | Upper Parana                                     | 3                 | -46.5622220 | -23.1241670 | 110970     | 0                                                           | 0                   | 0             | 0              | 0           |
| atlanta      | us      | Appalachian Piedmont                             | 26                | -84.3880556 | 33.7488889  | 422908     | 0                                                           | 0                   | 1             | 9              | 10          |
| atsugi       | jp      | Honshu - Shikoku - Kyushu                        | 5                 | 139.3597220 | 35.4388890  | 229203     | 0                                                           | 0                   | 0             | 3              | 3           |
| atyrau       | kz      | Volga - Ural                                     | 0                 | 51.8833330  | 47.1166670  | 146440     | 0                                                           | 0                   | 0             | 0              | 0           |
| auckland     | nz      | New Zealand                                      | 2                 | 174.7666670 | -36.8666670 | 417910     | 0                                                           | 0                   | 0             | 1              | 1           |
| augzburg     | de      | Upper Danube                                     | 5                 | 10.8833330  | 48.3666670  | 261842     | 0                                                           | 0                   | 0             | 0              | 0           |

Table S2 Cities and freshwater reptiles

| City       | Country | Freshwater Ecoregions of the World (FEOW) Region | Regional richness | Longitude                  | Latitude    | Population | # of freshwater reptile species within 50 km of city centre |                     |               |                |             |
|------------|---------|--------------------------------------------------|-------------------|----------------------------|-------------|------------|-------------------------------------------------------------|---------------------|---------------|----------------|-------------|
|            |         |                                                  |                   |                            |             |            | Lizard species                                              | Crocodilian species | Snake species | Turtle species | All species |
| aurangabad | in      | Northern Deccan Plateau                          | 2                 | 75.3333330                 | 19.8833330  | 1016520    | 0                                                           | 0                   | 0             | 0              | 0           |
| aurora     | us      | Middle Missouri                                  | 12                | -                          | 39.7294444  | 299780     | 0                                                           | 0                   | 0             | 5              | 5           |
| aurora     | us      | Upper Mississippi                                | 20                | 104.8313889<br>-88.3200000 | 41.7605556  | 174276     | 0                                                           | 0                   | 0             | 5              | 5           |
| austin     | us      | East Texas Gulf                                  | 34                | -97.7427778                | 30.2669444  | 678368     | 0                                                           | 1                   | 1             | 14             | 16          |
| avadi      | in      | Southeastern Ghats                               | 3                 | 80.1016670                 | 13.1155560  | 250066     | 0                                                           | 1                   | 0             | 0              | 1           |
| awassa     | et      | Northern Eastern Rift                            | 1                 | 38.4666670                 | 7.0500000   | 133120     | 1                                                           | 0                   | 0             | 0              | 1           |
| awka       | ng      | Lower Niger - Benue                              | 2                 | 7.0741150                  | 6.2100950   | 167751     | 0                                                           | 0                   | 0             | 0              | 0           |
| ayacucho   | pe      | Amazonas High Andes                              | 1                 | -74.2238889                | -13.1583333 | 140510     | 0                                                           | 0                   | 0             | 0              | 0           |
| ayer itam  | my      | Northern Central Sumatra - Western Malaysia      | 7                 | 100.2833330                | 5.4000000   | 115276     | 1                                                           | 0                   | 0             | 2              | 3           |
| azamgarh   | in      | Ganges Delta & Plain                             | 13                | 83.1861110                 | 26.0600000  | 116655     | 0                                                           | 0                   | 0             | 0              | 0           |
| azare      | ng      | Lake Chad                                        | 0                 | 10.1948000                 | 11.6765000  | 105695     | 0                                                           | 0                   | 0             | 0              | 0           |
| babakan    | id      | Southern Sumatra - Western Java                  | 8                 | 108.4983330                | -6.8275000  | 124801     | 0                                                           | 0                   | 0             | 0              | 0           |
| babol      | ir      | Kura - South Caspian Drainages                   | 4                 | 52.6789510                 | 36.5513210  | 202812     | 0                                                           | 0                   | 0             | 0              | 0           |
| bac lieu   | vn      | Mekong Delta                                     | 3                 | 105.7244440                | 9.2850000   | 107920     | 0                                                           | 0                   | 0             | 0              | 0           |
| bacau      | ro      | Dniester - Lower Danube                          | 3                 | 26.9000000                 | 46.5666670  | 171397     | 0                                                           | 0                   | 0             | 0              | 0           |
| bacolod    | ph      | Northern Philippine Islands                      | 1                 | 122.9533000                | 10.6677000  | 453954     | 0                                                           | 0                   | 0             | 0              | 0           |
| bacoor     | ph      | Northern Philippine Islands                      | 1                 | 120.9290340                | 14.4590270  | 356987     | 0                                                           | 0                   | 0             | 0              | 0           |
| badajoz    | es      | Southern Iberia                                  | 8                 | -6.9706130                 | 38.8778940  | 133042     | 0                                                           | 0                   | 0             | 3              | 3           |
| badalona   | es      | Eastern Iberia                                   | 13                | 2.2447890                  | 41.4471450  | 222413     | 0                                                           | 0                   | 0             | 11             | 11          |
| badaojiang | cn      | Eastern Yellow Sea Drainages                     | 7                 | 126.4286110                | 41.9430560  | 183880     | 0                                                           | 0                   | 0             | 0              | 0           |
| badlapur   | in      | Western Ghats                                    | 4                 | 73.2666670                 | 19.1500000  | 104636     | 0                                                           | 0                   | 0             | 0              | 0           |
| bafoussam  | cm      | Lower Niger - Benue                              | 2                 | 10.4166667                 | 5.4666667   | 290798     | 0                                                           | 0                   | 0             | 0              | 0           |
| bagaha     | in      | Ganges Delta & Plain                             | 13                | 84.0833330                 | 27.1000000  | 103866     | 0                                                           | 1                   | 0             | 0              | 1           |
| baghdad    | iq      | Lower Tigris & Euphrates                         | 1                 | 44.3938889                 | 33.3386111  | 5672516    | 0                                                           | 0                   | 0             | 0              | 0           |

Table S2 Cities and freshwater reptiles

| City         | Country | Freshwater Ecoregions of the World (FEOW) Region | Regional richness | Longitude    | Latitude    | Population | # of freshwater reptile species within 50 km of city centre |                     |               |                |             |
|--------------|---------|--------------------------------------------------|-------------------|--------------|-------------|------------|-------------------------------------------------------------|---------------------|---------------|----------------|-------------|
|              |         |                                                  |                   |              |             |            | Lizard species                                              | Crocodilian species | Snake species | Turtle species | All species |
| baglan       | af      | Upper Amu Darya                                  | 0                 | 68.7082860   | 36.1306840  | 108481     | 0                                                           | 0                   | 0             | 0              | 0           |
| bago         | mm      | Sitang - Irawaddy                                | 0                 | 96.4833333   | 17.3333333  | 244407     | 0                                                           | 0                   | 0             | 0              | 0           |
| baguio       | ph      | Northern Philippine Islands                      | 1                 | 120.5930560  | 16.4163890  | 272732     | 0                                                           | 0                   | 0             | 0              | 0           |
| bahadurgarh  | in      | Ganges Delta & Plain                             | 13                | 76.9166670   | 28.6833330  | 153666     | 0                                                           | 0                   | 0             | 0              | 0           |
| baharampur   | in      | Ganges Delta & Plain                             | 13                | 88.2500000   | 24.1000000  | 180564     | 0                                                           | 0                   | 0             | 0              | 0           |
| bahawalnagar | pk      | Lower & Middle Indus                             | 2                 | 73.2536040   | 29.9986590  | 126654     | 0                                                           | 0                   | 0             | 0              | 0           |
| bahawalpur   | pk      | Lower & Middle Indus                             | 2                 | 71.6833330   | 29.4000000  | 552765     | 0                                                           | 0                   | 0             | 0              | 0           |
| bahia blanca | ar      | Bonaerensean Drainages                           | 1                 | -62.2724320  | -38.7195950 | 282950     | 0                                                           | 0                   | 0             | 0              | 0           |
| bahir dar    | et      | Lake Tana                                        | 1                 | 37.3833330   | 11.6000000  | 168929     | 1                                                           | 0                   | 0             | 0              | 1           |
| bahraich     | in      | Ganges Delta & Plain                             | 13                | 81.6000000   | 27.5833330  | 182236     | 0                                                           | 0                   | 0             | 0              | 0           |
| baia mare    | ro      | Dniester - Lower Danube                          | 3                 | 23.5833330   | 47.6666670  | 136554     | 0                                                           | 0                   | 0             | 0              | 0           |
| baicheng     | cn      | Songhua Jiang                                    | 0                 | 122.8166670  | 45.6166670  | 316970     | 0                                                           | 0                   | 0             | 0              | 0           |
| baidyabati   | in      | Ganges Delta & Plain                             | 13                | 88.3247220   | 22.7850000  | 115515     | 1                                                           | 0                   | 0             | 0              | 1           |
| baiyin       | cn      | Upper Huang He Corridor                          | 0                 | 104.2080560  | 36.5583330  | 188533     | 0                                                           | 0                   | 0             | 0              | 0           |
| bakersfield  | us      | Sacramento - San Joaquin                         | 10                | -119.0177778 | 35.3733333  | 291389     | 0                                                           | 0                   | 0             | 2              | 2           |
| baku         | az      | Kura - South Caspian Drainages                   | 4                 | 49.8822220   | 40.3952780  | 1116513    | 0                                                           | 0                   | 0             | 0              | 0           |
| balakovo     | ru      | Volga - Ural                                     | 0                 | 47.9172000   | 51.9284000  | 201923     | 0                                                           | 0                   | 0             | 0              | 0           |
| balashikha   | ru      | Volga - Ural                                     | 0                 | 37.9580550   | 55.8094520  | 150105     | 0                                                           | 0                   | 0             | 0              | 0           |
| baleshwar    | in      | Ganges Delta & Plain                             | 13                | 86.9316670   | 21.4941670  | 114331     | 0                                                           | 0                   | 0             | 0              | 0           |
| balikpapan   | id      | Eastern Borneo                                   | 3                 | 116.8333330  | -1.2833330  | 433939     | 0                                                           | 0                   | 1             | 1              | 2           |
| baliuag      | ph      | Northern Philippine Islands                      | 1                 | 120.8969440  | 14.9547220  | 135627     | 0                                                           | 0                   | 0             | 0              | 0           |
| ballia       | in      | Ganges Delta & Plain                             | 13                | 84.1666670   | 25.7500000  | 109722     | 0                                                           | 0                   | 0             | 0              | 0           |
| bally        | in      | Ganges Delta & Plain                             | 13                | 88.3402780   | 22.6461110  | 297001     | 1                                                           | 0                   | 0             | 0              | 1           |
| balti        | md      | Dniester - Lower Danube                          | 3                 | 27.9288890   | 47.7616670  | 150472     | 0                                                           | 0                   | 0             | 0              | 0           |
| baltimore    | us      | Chesapeake Bay                                   | 19                | -76.6125000  | 39.2902778  | 610892     | 0                                                           | 0                   | 0             | 10             | 10          |

Table S2 Cities and freshwater reptiles

| City             | Country | Freshwater Ecoregions of the World (FEOW) Region | Regional richness | Longitude   | Latitude   | Population | # of freshwater reptile species within 50 km of city centre |                     |               |                |             |
|------------------|---------|--------------------------------------------------|-------------------|-------------|------------|------------|-------------------------------------------------------------|---------------------|---------------|----------------|-------------|
|                  |         |                                                  |                   |             |            |            | Lizard species                                              | Crocodilian species | Snake species | Turtle species | All species |
| balurghat        | in      | Ganges Delta & Plain                             | 13                | 88.7666670  | 25.2166670 | 141418     | 0                                                           | 0                   | 0             | 0              | 0           |
| bama             | ng      | Lake Chad                                        | 0                 | 13.6855790  | 11.5221030 | 118129     | 0                                                           | 0                   | 0             | 0              | 0           |
| bamako           | ml      | Upper Niger                                      | 0                 | -8.0000000  | 12.6500000 | 1297390    | 0                                                           | 0                   | 0             | 0              | 0           |
| bamenda          | cm      | Lower Niger - Benue                              | 2                 | 10.1666667  | 5.9333333  | 393871     | 0                                                           | 0                   | 0             | 0              | 0           |
| banda            | in      | Ganges Delta & Plain                             | 13                | 80.3333330  | 25.4833330 | 152233     | 0                                                           | 0                   | 0             | 0              | 0           |
| banda aceh       | id      | Aceh                                             | 1                 | 95.3222000  | 5.5577000  | 250796     | 0                                                           | 0                   | 0             | 0              | 0           |
| bandar maharani  | my      | Malay Peninsula Eastern Slope                    | 12                | 102.5689000 | 2.0442000  | 127905     | 1                                                           | 0                   | 0             | 0              | 1           |
| bandar penggaram | my      | Malay Peninsula Eastern Slope                    | 12                | 102.9325000 | 1.8548000  | 156245     | 0                                                           | 0                   | 0             | 0              | 0           |
| bandar-e anzali  | ir      | Kura - South Caspian Drainages                   | 4                 | 49.4622000  | 37.4727000 | 110834     | 0                                                           | 0                   | 0             | 0              | 0           |
| bandundu         | cd      | Kasai                                            | 1                 | 17.3666670  | -3.3166670 | 118203     | 0                                                           | 0                   | 0             | 0              | 0           |
| bandung          | id      | Southern Sumatra - Western Java                  | 8                 | 107.6186110 | -6.9038890 | 1699822    | 0                                                           | 0                   | 0             | 0              | 0           |
| baneh            | ir      | Upper Tigris & Euphrates                         | 3                 | 45.8853000  | 35.9975000 | 104939     | 0                                                           | 0                   | 0             | 0              | 0           |
| bangalore        | in      | Southeastern Ghats                               | 3                 | 77.5833330  | 12.9833330 | 4931603    | 0                                                           | 0                   | 0             | 0              | 0           |
| bangaon          | in      | Ganges Delta & Plain                             | 13                | 88.8166670  | 23.0666670 | 111704     | 0                                                           | 0                   | 0             | 0              | 0           |
| bangkok          | th      | Chao Phraya                                      | 12                | 100.5014440 | 13.7539790 | 5104475    | 1                                                           | 0                   | 0             | 7              | 8           |
| bangui           | cf      | Sudanic Congo - Oubangi                          | 0                 | 18.5833333  | 4.3666667  | 684190     | 0                                                           | 0                   | 0             | 0              | 0           |
| banja luka       | ba      | Dniester - Lower Danube                          | 3                 | 17.1855556  | 44.7758333 | 221100     | 0                                                           | 0                   | 0             | 0              | 0           |
| banjaran         | id      | Southern Sumatra - Western Java                  | 8                 | 107.7700000 | -6.8716670 | 165136     | 0                                                           | 0                   | 0             | 0              | 0           |
| banjarmasin      | id      | Southeastern Borneo                              | 6                 | 114.5833330 | -3.3333330 | 572910     | 1                                                           | 0                   | 0             | 0              | 1           |
| bankura          | in      | Ganges Delta & Plain                             | 13                | 87.0666670  | 23.2500000 | 133979     | 0                                                           | 0                   | 0             | 0              | 0           |
| bansbaria        | in      | Ganges Delta & Plain                             | 13                | 88.3994440  | 22.9719440 | 108485     | 0                                                           | 0                   | 0             | 0              | 0           |
| bantou           | cn      | Coastal Fujian - Zeijang                         | 1                 | 118.4033330 | 25.4430560 | 118557     | 0                                                           | 0                   | 0             | 0              | 0           |
| banyuwangi       | id      | Central & Eastern Java                           | 4                 | 114.3646000 | -8.2215000 | 108178     | 1                                                           | 0                   | 0             | 0              | 1           |
| baoding          | cn      | Lower Huang He                                   | 0                 | 115.4902780 | 38.8511110 | 995652     | 0                                                           | 0                   | 0             | 0              | 0           |
| baoji            | cn      | Lower Huang He                                   | 0                 | 107.3590450 | 34.3659070 | 438295     | 0                                                           | 0                   | 0             | 0              | 0           |

Table S2 Cities and freshwater reptiles

| City            | Country | Freshwater Ecoregions of the World (FEOW) Region | Regional richness | Longitude   | Latitude    | Population | # of freshwater reptile species within 50 km of city centre |                     |               |                |             |
|-----------------|---------|--------------------------------------------------|-------------------|-------------|-------------|------------|-------------------------------------------------------------|---------------------|---------------|----------------|-------------|
|                 |         |                                                  |                   |             |             |            | Lizard species                                              | Crocodilian species | Snake species | Turtle species | All species |
| baoshan         | cn      | Lower Amur                                       | 0                 | 131.4244440 | 46.5586110  | 123791     | 0                                                           | 0                   | 0             | 0              | 0           |
| barakpur        | in      | Ganges Delta & Plain                             | 13                | 88.3719440  | 22.7613890  | 148188     | 1                                                           | 0                   | 0             | 0              | 1           |
| baranagar       | in      | Ganges Delta & Plain                             | 13                | 88.3652780  | 22.6433330  | 260097     | 1                                                           | 0                   | 0             | 0              | 1           |
| barasat         | in      | Ganges Delta & Plain                             | 13                | 88.4411110  | 22.6841670  | 298270     | 1                                                           | 0                   | 0             | 0              | 1           |
| barbacena       | br      | Upper Parana                                     | 3                 | -43.7666670 | -21.2333330 | 122213     | 0                                                           | 0                   | 0             | 0              | 0           |
| barcelona       | es      | Eastern Iberia                                   | 13                | 2.1741000   | 41.3983710  | 1570378    | 0                                                           | 0                   | 0             | 11             | 11          |
| barcelona       | ve      | South America Caribbean Drainages - Trinidad     | 6                 | -64.7000000 | 10.1333333  | 424819     | 0                                                           | 0                   | 0             | 11             | 11          |
| barddhaman      | in      | Ganges Delta & Plain                             | 13                | 87.8694440  | 23.2405560  | 301754     | 0                                                           | 0                   | 0             | 0              | 0           |
| bareli          | in      | Ganges Delta & Plain                             | 13                | 79.4166670  | 28.3500000  | 745509     | 0                                                           | 0                   | 0             | 0              | 0           |
| bari            | it      | Italian Peninsula & Islands                      | 6                 | 16.8500000  | 41.1333330  | 303049     | 0                                                           | 0                   | 0             | 0              | 0           |
| barinas         | ve      | Orinoco Piedmont                                 | 10                | -70.2072222 | 8.6291667   | 284305     | 0                                                           | 0                   | 0             | 0              | 0           |
| baripada        | in      | Ganges Delta & Plain                             | 13                | 86.7213890  | 21.9350000  | 116227     | 0                                                           | 0                   | 0             | 0              | 0           |
| barisal         | bd      | Ganges Delta & Plain                             | 13                | 90.3666667  | 22.7000000  | 280437     | 0                                                           | 0                   | 0             | 0              | 0           |
| barnala         | in      | Lower & Middle Indus                             | 2                 | 75.5500000  | 30.3833330  | 105024     | 0                                                           | 0                   | 0             | 0              | 0           |
| barnaul         | ru      | Ob                                               | 0                 | 83.7636110  | 53.3605560  | 599586     | 0                                                           | 0                   | 0             | 0              | 0           |
| barquisimeto    | ve      | Orinoco High Andes                               | 2                 | -69.3227778 | 10.0738889  | 809564     | 0                                                           | 0                   | 0             | 0              | 0           |
| barra mansa     | br      | Paraiba do Sul                                   | 0                 | -44.1833330 | -22.5333330 | 164054     | 0                                                           | 0                   | 0             | 0              | 0           |
| barrancabermeja | co      | Magdalena - Sinu                                 | 15                | -73.8547220 | 7.0652780   | 191406     | 2                                                           | 2                   | 0             | 4              | 8           |
| barranquilla    | co      | Magdalena - Sinu                                 | 15                | -74.7963890 | 10.9638890  | 1380437    | 0                                                           | 0                   | 0             | 2              | 2           |
| barreiras       | br      | S. Francisco                                     | 0                 | -45.0000000 | -12.1333330 | 158296     | 0                                                           | 0                   | 0             | 0              | 0           |
| barretos        | br      | Upper Parana                                     | 3                 | -48.5500000 | -20.5500000 | 101222     | 0                                                           | 0                   | 0             | 0              | 0           |
| barrie          | ca      | Laurentian Great Lakes                           | 16                | -79.7000000 | 44.3833330  | 182070     | 0                                                           | 0                   | 0             | 4              | 4           |
| barsi           | in      | Southern Deccan Plateau                          | 0                 | 75.7000000  | 18.2333330  | 110992     | 0                                                           | 0                   | 0             | 0              | 0           |
| barueri         | br      | Upper Parana                                     | 3                 | -46.8833330 | -23.5166670 | 251999     | 0                                                           | 0                   | 0             | 1              | 1           |
| baruta          | ve      | South America Caribbean Drainages - Trinidad     | 6                 | -66.8833333 | 10.4333333  | 244216     | 0                                                           | 0                   | 0             | 0              | 0           |

Table S2 Cities and freshwater reptiles

| City        | Country | Freshwater Ecoregions of the World (FEOW) Region | Regional richness | Longitude   | Latitude    | Population | # of freshwater reptile species within 50 km of city centre |                     |               |                |             |
|-------------|---------|--------------------------------------------------|-------------------|-------------|-------------|------------|-------------------------------------------------------------|---------------------|---------------|----------------|-------------|
|             |         |                                                  |                   |             |             |            | Lizard species                                              | Crocodilian species | Snake species | Turtle species | All species |
| basel       | ch      | Central & Western Europe                         | 13                | 7.5732710   | 47.5583950  | 164474     | 0                                                           | 0                   | 0             | 1              | 1           |
| basildon    | gb      | Central & Western Europe                         | 13                | 0.4666670   | 51.5666670  | 101363     | 0                                                           | 0                   | 0             | 2              | 2           |
| basirhat    | in      | Ganges Delta & Plain                             | 13                | 88.8941670  | 22.6572220  | 117431     | 0                                                           | 0                   | 0             | 0              | 0           |
| basti       | in      | Ganges Delta & Plain                             | 13                | 82.7166670  | 26.8000000  | 115126     | 0                                                           | 0                   | 0             | 0              | 0           |
| bat yam     | il      | Coastal Levant                                   | 1                 | 34.7502780  | 32.0230560  | 130973     | 0                                                           | 0                   | 0             | 0              | 0           |
| bata        | gq      | Southern Gulf of Guinea Drainages                | 4                 | 9.7500000   | 1.8500000   | 173036     | 0                                                           | 0                   | 0             | 0              | 0           |
| batala      | in      | Lower & Middle Indus                             | 2                 | 75.2027780  | 31.8186110  | 145479     | 0                                                           | 0                   | 0             | 0              | 0           |
| batangas    | ph      | Northern Philippine Islands                      | 1                 | 121.0584000 | 13.7567000  | 238907     | 0                                                           | 0                   | 0             | 0              | 0           |
| bataysk     | ru      | Don                                              | 1                 | 39.7518100  | 47.1397470  | 109964     | 0                                                           | 0                   | 0             | 0              | 0           |
| batman      | tr      | Upper Tigris & Euphrates                         | 3                 | 41.1322080  | 37.8873780  | 302204     | 0                                                           | 0                   | 0             | 0              | 0           |
| baton rouge | us      | Lower Mississippi                                | 33                | -91.1544444 | 30.4505556  | 223349     | 0                                                           | 1                   | 1             | 10             | 12          |
| baturaja    | id      | Southern Sumatra - Western Java                  | 8                 | 104.1666670 | -4.1333330  | 134824     | 0                                                           | 0                   | 0             | 0              | 0           |
| bauchi      | ng      | Lower Niger - Benue                              | 2                 | 9.8432730   | 10.3134410  | 316173     | 0                                                           | 0                   | 0             | 0              | 0           |
| bauru       | br      | Upper Parana                                     | 3                 | -49.0666670 | -22.3166670 | 335031     | 0                                                           | 0                   | 0             | 0              | 0           |
| bayamo      | cu      | Cuba - Cayman Islands                            | 2                 | -76.6433333 | 20.3791667  | 192641     | 0                                                           | 0                   | 0             | 0              | 0           |
| bayrut      | lb      | Coastal Levant                                   | 1                 | 35.5097222  | 33.8719444  | 1252010    | 0                                                           | 0                   | 0             | 0              | 0           |
| beaumont    | us      | Sabine - Galveston                               | 29                | -94.1016667 | 30.0858333  | 111485     | 0                                                           | 1                   | 1             | 12             | 14          |
| beawar      | in      | Lower & Middle Indus                             | 2                 | 74.3166670  | 26.1000000  | 130786     | 0                                                           | 0                   | 0             | 0              | 0           |
| begusarai   | in      | Ganges Delta & Plain                             | 13                | 86.1333330  | 25.4166670  | 103071     | 0                                                           | 0                   | 0             | 0              | 0           |
| beian       | cn      | Songhua Jiang                                    | 0                 | 126.6000000 | 48.2666670  | 145670     | 0                                                           | 0                   | 0             | 0              | 0           |
| beibei      | cn      | Middle Yangtze                                   | 1                 | 106.4338890 | 29.8255560  | 112019     | 0                                                           | 0                   | 0             | 0              | 0           |
| beihai      | cn      | Xi Yang                                          | 15                | 109.1000000 | 21.4833330  | 289568     | 0                                                           | 0                   | 0             | 0              | 0           |
| beipiao     | cn      | Liao He                                          | 0                 | 120.7791670 | 41.7919440  | 154999     | 0                                                           | 0                   | 0             | 0              | 0           |
| beira       | mz      | Zambezian Lowveld                                | 10                | 34.8388889  | -19.8436111 | 530706     | 0                                                           | 0                   | 0             | 0              | 0           |
| beirut      | lb      | Coastal Levant                                   | 1                 | 35.5097222  | 33.8719444  | 1252010    | 0                                                           | 0                   | 0             | 0              | 0           |

Table S2 Cities and freshwater reptiles

| City           | Country | Freshwater Ecoregions of the World (FEOW) Region | Regional richness | Longitude    | Latitude    | Population | # of freshwater reptile species within 50 km of city centre |                     |               |                |             |
|----------------|---------|--------------------------------------------------|-------------------|--------------|-------------|------------|-------------------------------------------------------------|---------------------|---------------|----------------|-------------|
|                |         |                                                  |                   |              |             |            | Lizard species                                              | Crocodilian species | Snake species | Turtle species | All species |
| bekasi         | id      | Southern Sumatra - Western Java                  | 8                 | 106.9896000  | -6.2349000  | 1520204    | 1                                                           | 2                   | 2             | 0              | 5           |
| belawan        | id      | Northern Central Sumatra - Western Malaysia      | 7                 | 98.6832000   | 3.7755000   | 102709     | 0                                                           | 0                   | 0             | 1              | 1           |
| belem          | br      | Amazonas Estuary & Coastal Drainages             | 0                 | -48.4833330  | -1.4500000  | 1407737    | 0                                                           | 0                   | 0             | 0              | 0           |
| belfast        | gb      | Northern British Isles                           | 1                 | -5.9333330   | 54.5833330  | 585994     | 0                                                           | 0                   | 0             | 0              | 0           |
| belford roxo   | br      | Fluminense                                       | 1                 | -43.4046540  | -22.7619950 | 466101     | 0                                                           | 0                   | 0             | 0              | 0           |
| belgaum        | in      | Western Ghats                                    | 4                 | 74.5000000   | 15.8666670  | 428756     | 0                                                           | 0                   | 0             | 0              | 0           |
| belgorod       | ru      | Don                                              | 1                 | 36.5801520   | 50.6107430  | 345293     | 0                                                           | 0                   | 0             | 0              | 0           |
| belgrade       | rs      | Dniester - Lower Danube                          | 3                 | 20.4680560   | 44.8186110  | 1115200    | 0                                                           | 0                   | 0             | 2              | 2           |
| bellary        | in      | Southern Deccan Plateau                          | 0                 | 76.9333330   | 15.1500000  | 336710     | 0                                                           | 0                   | 0             | 0              | 0           |
| bellevue       | us      | Alaska & Canada Pacific Coastal                  | 4                 | -122.1994444 | 47.6105556  | 111927     | 0                                                           | 0                   | 0             | 4              | 4           |
| belo           | co      | Magdalena - Sinu                                 | 15                | -75.5579510  | 6.3373150   | 392945     | 2                                                           | 0                   | 0             | 2              | 4           |
| belo horizonte | br      | S. Francisco                                     | 0                 | -43.9333330  | -19.9166670 | 2373255    | 0                                                           | 0                   | 0             | 0              | 0           |
| bene beraq     | il      | Coastal Levant                                   | 1                 | 34.8397220   | 32.0902780  | 140849     | 0                                                           | 0                   | 0             | 1              | 1           |
| bengbu         | cn      | Lower Yangtze                                    | 4                 | 117.3608330  | 32.9408330  | 576648     | 0                                                           | 0                   | 0             | 0              | 0           |
| benghazi       | ly      | Sahara                                           | 1                 | 20.0666667   | 32.1166667  | 650629     | 0                                                           | 0                   | 0             | 0              | 0           |
| bengkulu       | id      | Indian Ocean Slope of Sumatra & Java             | 9                 | 102.2666670  | -3.8000000  | 309759     | 0                                                           | 0                   | 0             | 0              | 0           |
| benguela       | ao      | Cuanza                                           | 3                 | 13.4072220   | -12.5783330 | 151235     | 0                                                           | 0                   | 0             | 0              | 0           |
| benha          | eg      | Nile Delta                                       | 0                 | 31.1875000   | 30.4608333  | 167070     | 0                                                           | 0                   | 0             | 0              | 0           |
| beni suef      | eg      | Lower Nile                                       | 1                 | 31.0888889   | 29.0638889  | 189637     | 0                                                           | 0                   | 0             | 0              | 0           |
| benin          | ng      | Bight Drainages                                  | 7                 | 5.6274920    | 6.3350450   | 1125126    | 0                                                           | 0                   | 0             | 0              | 0           |
| benoni         | za      | Southern Temperate Highveld                      | 5                 | 28.3113380   | -26.1908510 | 605363     | 0                                                           | 1                   | 1             | 1              | 3           |
| benxi          | cn      | Liao He                                          | 0                 | 123.7650000  | 41.2886110  | 987717     | 0                                                           | 0                   | 0             | 0              | 0           |
| beppu          | jp      | Honshu - Shikoku - Kyushu                        | 5                 | 131.4919440  | 33.2736110  | 125067     | 0                                                           | 0                   | 0             | 0              | 0           |
| berbera        | so      | Horn of Africa                                   | 0                 | 45.0163889   | 10.4355556  | 242363     | 0                                                           | 0                   | 0             | 0              | 0           |

Table S2 Cities and freshwater reptiles

| City              | Country | Freshwater Ecoregions of the World (FEOW) Region | Regional richness | Longitude    | Latitude    | Population | # of freshwater reptile species within 50 km of city centre |                     |               |                |             |
|-------------------|---------|--------------------------------------------------|-------------------|--------------|-------------|------------|-------------------------------------------------------------|---------------------|---------------|----------------|-------------|
|                   |         |                                                  |                   |              |             |            | Lizard species                                              | Crocodilian species | Snake species | Turtle species | All species |
| berezniki         | ru      | Volga - Ural                                     | 0                 | 56.8123710   | 59.4151890  | 167750     | 0                                                           | 0                   | 0             | 0              | 0           |
| bergamo           | it      | Gulf of Venice Drainages                         | 8                 | 9.7166670    | 45.6833330  | 113603     | 0                                                           | 0                   | 0             | 2              | 2           |
| bergen            | no      | Norwegian Sea Drainages                          | 0                 | 5.3247220    | 60.3911110  | 214154     | 0                                                           | 0                   | 0             | 0              | 0           |
| bergisch gladbach | de      | Central & Western Europe                         | 13                | 7.1333330    | 50.9833330  | 106611     | 0                                                           | 0                   | 0             | 4              | 4           |
| berkeley          | us      | Sacramento - San Joaquin                         | 10                | -122.2716667 | 37.8716667  | 100158     | 0                                                           | 0                   | 0             | 6              | 6           |
| berlin            | de      | Central & Western Europe                         | 13                | 13.4000000   | 52.5166670  | 3398362    | 0                                                           | 0                   | 0             | 4              | 4           |
| bern              | ch      | Central & Western Europe                         | 13                | 7.4666670    | 46.9166670  | 123018     | 0                                                           | 0                   | 0             | 0              | 0           |
| bertoua           | cm      | Sangha                                           | 1                 | 13.6833333   | 4.5833333   | 218217     | 0                                                           | 0                   | 0             | 0              | 0           |
| besancon          | fr      | Central & Western Europe                         | 13                | 6.0181520    | 47.2487780  | 120139     | 0                                                           | 0                   | 0             | 0              | 0           |
| bethal            | za      | Southern Temperate Highveld                      | 5                 | 29.4687040   | -26.4263730 | 101986     | 0                                                           | 0                   | 0             | 0              | 0           |
| betim             | br      | S. Francisco                                     | 0                 | -44.2166670  | -19.9666670 | 384038     | 0                                                           | 0                   | 0             | 0              | 0           |
| bettiah           | in      | Ganges Delta & Plain                             | 13                | 84.5000000   | 26.8000000  | 127022     | 0                                                           | 0                   | 0             | 0              | 0           |
| bhadravati        | in      | Southern Deccan Plateau                          | 0                 | 75.7166670   | 13.8666670  | 163917     | 0                                                           | 0                   | 0             | 0              | 0           |
| bhadreswar        | in      | Ganges Delta & Plain                             | 13                | 88.3505560   | 22.8244440  | 121674     | 1                                                           | 0                   | 0             | 0              | 1           |
| bhagalpur         | in      | Ganges Delta & Plain                             | 13                | 87.0000000   | 25.2500000  | 361587     | 0                                                           | 0                   | 0             | 0              | 0           |
| bhairab bazar     | bd      | Ganges Delta & Plain                             | 13                | 90.9666667   | 24.0666667  | 105470     | 0                                                           | 0                   | 0             | 0              | 0           |
| bharatpur         | in      | Ganges Delta & Plain                             | 13                | 77.4833330   | 27.2166670  | 229400     | 0                                                           | 1                   | 0             | 3              | 4           |
| bharatpur         | np      | Ganges Himalayan Foothills                       | 3                 | 84.4333333   | 27.6833333  | 107162     | 0                                                           | 1                   | 0             | 3              | 4           |
| bharuch           | in      | Namuda - Tapi                                    | 1                 | 72.9666670   | 21.7000000  | 153538     | 0                                                           | 0                   | 0             | 0              | 0           |
| bhatpara          | in      | Ganges Delta & Plain                             | 13                | 88.4088890   | 22.8713890  | 483175     | 1                                                           | 0                   | 0             | 0              | 1           |
| bhavnagar         | in      | Namuda - Tapi                                    | 1                 | 72.1500000   | 21.7666670  | 555014     | 0                                                           | 0                   | 0             | 0              | 0           |
| bhilai            | in      | Northern Deccan Plateau                          | 2                 | 81.4333330   | 21.2166670  | 625203     | 0                                                           | 0                   | 0             | 0              | 0           |
| bhilwara          | in      | Ganges Delta & Plain                             | 13                | 74.6333330   | 25.3500000  | 326454     | 0                                                           | 0                   | 0             | 0              | 0           |
| bhimavaram        | in      | Southern Deccan Plateau                          | 0                 | 81.5333330   | 16.5333330  | 142979     | 0                                                           | 0                   | 0             | 0              | 0           |
| bhind             | in      | Ganges Delta & Plain                             | 13                | 78.7883330   | 26.5641670  | 174053     | 0                                                           | 2                   | 0             | 4              | 6           |

Table S2 Cities and freshwater reptiles

| City          | Country | Freshwater Ecoregions of the World (FEOW) Region | Regional richness | Longitude   | Latitude   | Population | # of freshwater reptile species within 50 km of city centre |                     |               |                |             |
|---------------|---------|--------------------------------------------------|-------------------|-------------|------------|------------|-------------------------------------------------------------|---------------------|---------------|----------------|-------------|
|               |         |                                                  |                   |             |            |            | Lizard species                                              | Crocodilian species | Snake species | Turtle species | All species |
| bhiwandi      | in      | Western Ghats                                    | 4                 | 73.0666670  | 19.3000000 | 707090     | 0                                                           | 0                   | 0             | 0              | 0           |
| bhiwani       | in      | Lower & Middle Indus                             | 2                 | 76.1333330  | 28.7833330 | 190868     | 0                                                           | 0                   | 0             | 0              | 0           |
| bhopal        | in      | Ganges Delta & Plain                             | 13                | 77.4000000  | 23.2666670 | 1600080    | 0                                                           | 0                   | 0             | 0              | 0           |
| bhubaneswar   | in      | Northern Deccan Plateau                          | 2                 | 85.8333330  | 20.2333330 | 762307     | 0                                                           | 0                   | 0             | 0              | 0           |
| bhuj          | in      | Lower & Middle Indus                             | 2                 | 69.6666670  | 23.2666670 | 133458     | 0                                                           | 0                   | 0             | 0              | 0           |
| bhusawal      | in      | Namuda - Tapi                                    | 1                 | 75.7666670  | 21.0500000 | 183016     | 0                                                           | 0                   | 0             | 0              | 0           |
| bialystok     | pl      | Central & Western Europe                         | 13                | 23.1500000  | 53.1333330 | 291855     | 0                                                           | 0                   | 0             | 0              | 0           |
| bid           | in      | Northern Deccan Plateau                          | 2                 | 75.7666670  | 18.9833330 | 148477     | 0                                                           | 0                   | 0             | 0              | 0           |
| bida          | ng      | Lower Niger - Benue                              | 2                 | 6.0166670   | 9.0833330  | 171672     | 0                                                           | 0                   | 0             | 0              | 0           |
| bidar         | in      | Northern Deccan Plateau                          | 2                 | 77.5500000  | 17.9000000 | 204088     | 0                                                           | 0                   | 0             | 0              | 0           |
| bielefeld     | de      | Central & Western Europe                         | 13                | 8.5333330   | 52.0333330 | 327198     | 0                                                           | 0                   | 0             | 2              | 2           |
| bielsko-biala | pl      | Central & Western Europe                         | 13                | 19.0468630  | 49.8224490 | 176515     | 0                                                           | 0                   | 0             | 1              | 1           |
| bien hoa      | vn      | Mekong Delta                                     | 3                 | 106.8166670 | 10.9500000 | 407224     | 1                                                           | 0                   | 0             | 0              | 1           |
| bihar         | in      | Ganges Delta & Plain                             | 13                | 85.5166670  | 25.1833330 | 244256     | 0                                                           | 0                   | 0             | 0              | 0           |
| bijapur       | in      | Southern Deccan Plateau                          | 0                 | 75.7000000  | 16.8333330 | 271087     | 0                                                           | 0                   | 0             | 0              | 0           |
| bikaner       | in      | Lower & Middle Indus                             | 2                 | 73.3000000  | 28.0166670 | 576056     | 0                                                           | 0                   | 0             | 0              | 0           |
| bila tserkva  | ua      | Dnieper - South Bug                              | 2                 | 30.1120860  | 49.8093860 | 199161     | 0                                                           | 0                   | 0             | 0              | 0           |
| bilaspur      | in      | Northern Deccan Plateau                          | 2                 | 82.1500000  | 22.0833330 | 282736     | 0                                                           | 0                   | 0             | 0              | 0           |
| bilbao        | es      | Cantabric Coast - Languedoc                      | 10                | -2.9387640  | 43.2609190 | 349270     | 0                                                           | 0                   | 0             | 3              | 3           |
| binangonan    | ph      | Northern Philippine Islands                      | 1                 | 121.1929000 | 14.4646000 | 219203     | 0                                                           | 0                   | 0             | 0              | 0           |
| binjai        | id      | Northern Central Sumatra - Western Malaysia      | 7                 | 98.7240000  | 3.5640000  | 228794     | 0                                                           | 0                   | 0             | 1              | 1           |
| bintulu       | my      | Northwestern Borneo                              | 9                 | 113.0333330 | 3.1666670  | 151718     | 0                                                           | 0                   | 0             | 0              | 0           |
| binzhou       | cn      | Lower Huang He                                   | 0                 | 118.0166670 | 37.3666670 | 115893     | 0                                                           | 0                   | 0             | 0              | 0           |
| biratnagar    | np      | Ganges Delta & Plain                             | 13                | 87.2833333  | 26.4833333 | 182331     | 0                                                           | 0                   | 0             | 2              | 2           |
| birganj       | np      | Ganges Delta & Plain                             | 13                | 84.8666667  | 27.0000000 | 133244     | 0                                                           | 1                   | 0             | 0              | 1           |

Table S2 Cities and freshwater reptiles

| City            | Country | Freshwater Ecoregions of the World (FEOW) Region | Regional richness | Longitude   | Latitude    | Population | # of freshwater reptile species within 50 km of city centre |                     |               |                |             |
|-----------------|---------|--------------------------------------------------|-------------------|-------------|-------------|------------|-------------------------------------------------------------|---------------------|---------------|----------------|-------------|
|                 |         |                                                  |                   |             |             |            | Lizard species                                              | Crocodilian species | Snake species | Turtle species | All species |
| birigui         | br      | Upper Parana                                     | 3                 | -50.3166670 | -21.3000000 | 102279     | 0                                                           | 0                   | 0             | 0              | 0           |
| birjand         | ir      | Kavir & Lut Deserts                              | 0                 | 59.2211390  | 32.8662770  | 197004     | 0                                                           | 0                   | 0             | 0              | 0           |
| birmingham      | gb      | Central & Western Europe                         | 13                | -1.9166670  | 52.4666670  | 984336     | 0                                                           | 0                   | 1             | 6              | 7           |
| birmingham      | us      | Mobile Bay                                       | 27                | -86.8025000 | 33.5205556  | 231621     | 0                                                           | 0                   | 1             | 6              | 7           |
| birnin kebbi    | ng      | Lower Niger - Benue                              | 2                 | 4.1975000   | 12.4538890  | 108172     | 0                                                           | 0                   | 0             | 0              | 0           |
| bisho           | za      | Amatolo - Winterberg Highlands                   | 1                 | 27.4421790  | -32.8472120 | 137288     | 0                                                           | 0                   | 0             | 0              | 0           |
| bissau          | gw      | Senegal - Gambia                                 | 4                 | -15.5833333 | 11.8500000  | 388094     | 0                                                           | 0                   | 0             | 0              | 0           |
| bitung          | id      | Sulawesi                                         | 2                 | 125.1824000 | 1.4451000   | 137361     | 1                                                           | 0                   | 1             | 1              | 3           |
| biysk           | ru      | Ob                                               | 0                 | 85.2072220  | 52.5363890  | 215433     | 0                                                           | 0                   | 0             | 0              | 0           |
| blackburn       | gb      | Central & Western Europe                         | 13                | -2.4833330  | 53.7500000  | 106154     | 0                                                           | 0                   | 0             | 1              | 1           |
| blackpool       | gb      | Central & Western Europe                         | 13                | -3.0500000  | 53.8166670  | 143101     | 0                                                           | 0                   | 0             | 1              | 1           |
| blagoveshchensk | ru      | Middle Amur                                      | 0                 | 127.5333330 | 50.2666670  | 221298     | 0                                                           | 0                   | 0             | 0              | 0           |
| blantyre        | mw      | Lower Zambezi                                    | 3                 | 35.0000000  | -15.7833333 | 584870     | 1                                                           | 1                   | 1             | 1              | 4           |
| blitar          | id      | Central & Eastern Java                           | 4                 | 112.1681000 | -8.0983000  | 132431     | 0                                                           | 0                   | 0             | 0              | 0           |
| bloemfontein    | za      | Southern Temperate Highveld                      | 5                 | 26.2140030  | -29.1210650 | 463084     | 0                                                           | 0                   | 0             | 0              | 0           |
| blumenau        | br      | Southeastern Mata Atlantica                      | 2                 | -49.0615000 | -26.9222000 | 293955     | 0                                                           | 0                   | 0             | 0              | 0           |
| boa vista       | br      | Amazonas Guiana Shield                           | 1                 | -60.6666670 | 2.8166670   | 235159     | 0                                                           | 0                   | 0             | 0              | 0           |
| bobo dioulasso  | bf      | Volta                                            | 7                 | -4.3000000  | 11.2000000  | 370809     | 0                                                           | 0                   | 0             | 0              | 0           |
| bochum          | de      | Central & Western Europe                         | 13                | 7.2166670   | 51.4833330  | 387061     | 0                                                           | 0                   | 0             | 2              | 2           |
| bogor           | id      | Southern Sumatra - Western Java                  | 8                 | 106.7891670 | -6.5944440  | 769328     | 1                                                           | 0                   | 2             | 0              | 3           |
| bogota          | co      | Magdalena - Sinu                                 | 15                | -74.0628270 | 4.6491780   | 7102602    | 0                                                           | 0                   | 0             | 3              | 3           |
| bohicon         | bj      | Bight Drainages                                  | 7                 | 2.0666667   | 7.2000000   | 125116     | 1                                                           | 1                   | 3             | 0              | 5           |
| bojnurd         | ir      | Turan Plain                                      | 1                 | 57.3290310  | 37.4747300  | 192062     | 0                                                           | 0                   | 0             | 0              | 0           |
| bokaro          | in      | Ganges Delta & Plain                             | 13                | 85.9666670  | 23.7833330  | 418578     | 0                                                           | 0                   | 0             | 0              | 0           |
| boksburg        | za      | Southern Temperate Highveld                      | 5                 | 28.2547320  | -26.2149530 | 445182     | 0                                                           | 1                   | 1             | 1              | 3           |

Table S2 Cities and freshwater reptiles

| City                 | Country | Freshwater Ecoregions of the World (FEOW) Region   | Regional richness | Longitude   | Latitude    | Population | # of freshwater reptile species within 50 km of city centre |                     |               |                |             |
|----------------------|---------|----------------------------------------------------|-------------------|-------------|-------------|------------|-------------------------------------------------------------|---------------------|---------------|----------------|-------------|
|                      |         |                                                    |                   |             |             |            | Lizard species                                              | Crocodilian species | Snake species | Turtle species | All species |
| bologna              | it      | Gulf of Venice Drainages                           | 8                 | 11.3333330  | 44.4833330  | 367168     | 0                                                           | 0                   | 0             | 2              | 2           |
| bolton               | gb      | Central & Western Europe                           | 13                | -2.4333330  | 53.5833330  | 141331     | 0                                                           | 0                   | 0             | 1              | 1           |
| boma                 | cd      | Lower Congo                                        | 0                 | 13.0500000  | -5.8500000  | 344522     | 0                                                           | 0                   | 0             | 0              | 0           |
| bombay               | in      | Western Ghats                                      | 4                 | 72.8258330  | 18.9750000  | 12692717   | 0                                                           | 0                   | 0             | 0              | 0           |
| bonn                 | de      | Central & Western Europe                           | 13                | 7.1000000   | 50.7333330  | 314081     | 0                                                           | 0                   | 0             | 4              | 4           |
| bontang              | id      | Eastern Borneo                                     | 3                 | 117.5000000 | 0.1333330   | 101693     | 0                                                           | 0                   | 0             | 0              | 0           |
| bordeaux             | fr      | Cantabric Coast - Languedoc                        | 10                | -0.5805000  | 44.8404390  | 219311     | 0                                                           | 0                   | 0             | 2              | 2           |
| borujerd             | ir      | Upper Tigris & Euphrates                           | 3                 | 48.7516000  | 33.8973000  | 251976     | 0                                                           | 0                   | 0             | 0              | 0           |
| boshan               | cn      | Lower Huang He                                     | 0                 | 117.8333330 | 36.4833330  | 153596     | 0                                                           | 0                   | 0             | 0              | 0           |
| boston               | us      | Northeast US & Southeast Canada Atlantic Drainages | 18                | -71.0602778 | 42.3583333  | 571281     | 0                                                           | 0                   | 0             | 7              | 7           |
| botad                | in      | Namuda - Tapi                                      | 1                 | 71.6666670  | 22.1666670  | 117060     | 0                                                           | 0                   | 0             | 0              | 0           |
| botosani             | ro      | Dniester - Lower Danube                            | 3                 | 26.6666670  | 47.7500000  | 114784     | 0                                                           | 0                   | 0             | 0              | 0           |
| botshabelo           | za      | Southern Temperate Highveld                        | 5                 | 26.7736540  | -29.1230360 | 309810     | 0                                                           | 0                   | 0             | 0              | 0           |
| bottrop              | de      | Central & Western Europe                           | 13                | 6.9166670   | 51.5166670  | 120829     | 0                                                           | 0                   | 0             | 3              | 3           |
| botucatu             | br      | Upper Parana                                       | 3                 | -48.4333330 | -22.8666670 | 113865     | 0                                                           | 0                   | 0             | 0              | 0           |
| bouake               | ci      | Eburneo                                            | 0                 | -5.0303070  | 7.6938460   | 572149     | 0                                                           | 0                   | 0             | 0              | 0           |
| boulogne-billancourt | fr      | Central & Western Europe                           | 13                | 2.2473420   | 48.8356840  | 109765     | 0                                                           | 0                   | 0             | 1              | 1           |
| bourne-mouth         | gb      | Central & Western Europe                           | 13                | -1.8833330  | 50.7166670  | 175017     | 0                                                           | 0                   | 0             | 1              | 1           |
| bozhou               | cn      | Lower Yangtze                                      | 4                 | 115.7702780 | 33.8772220  | 174140     | 0                                                           | 0                   | 0             | 0              | 0           |
| bradford             | gb      | Central & Western Europe                           | 13                | -1.7500000  | 53.7833330  | 299310     | 0                                                           | 0                   | 0             | 1              | 1           |
| braga                | pt      | Western Iberia                                     | 6                 | -8.4200520  | 41.5503230  | 121393     | 0                                                           | 0                   | 0             | 1              | 1           |
| braganca paulista    | br      | Upper Parana                                       | 3                 | -46.5666670 | -22.9500000 | 125099     | 0                                                           | 0                   | 0             | 1              | 1           |
| brahmapur            | in      | Northern Deccan Plateau                            | 2                 | 84.7833330  | 19.3166670  | 324753     | 0                                                           | 0                   | 0             | 0              | 0           |
| braila               | ro      | Dniester - Lower Danube                            | 3                 | 27.9833330  | 45.2666670  | 213570     | 0                                                           | 0                   | 0             | 0              | 0           |
| brakpan              | za      | Southern Temperate Highveld                        | 5                 | 28.3693780  | -26.2365610 | 305702     | 0                                                           | 1                   | 1             | 1              | 3           |

Table S2 Cities and freshwater reptiles

| City        | Country | Freshwater Ecoregions of the World (FEOW) Region   | Regional richness | Longitude   | Latitude    | Population | # of freshwater reptile species within 50 km of city centre |                     |               |                |             |
|-------------|---------|----------------------------------------------------|-------------------|-------------|-------------|------------|-------------------------------------------------------------|---------------------|---------------|----------------|-------------|
|             |         |                                                    |                   |             |             |            | Lizard species                                              | Crocodilian species | Snake species | Turtle species | All species |
| brasilia    | br      | Upper Parana                                       | 3                 | -47.9166670 | -15.7833330 | 2207812    | 0                                                           | 0                   | 0             | 0              | 0           |
| brasov      | ro      | Dniester - Lower Danube                            | 3                 | 25.5833330  | 45.6333330  | 276089     | 0                                                           | 0                   | 0             | 0              | 0           |
| bratislava  | sk      | Upper Danube                                       | 5                 | 17.1166667  | 48.1500000  | 423737     | 0                                                           | 0                   | 0             | 1              | 1           |
| bratsk      | ru      | Yenisei                                            | 0                 | 101.6085000 | 56.1497000  | 259994     | 0                                                           | 0                   | 0             | 0              | 0           |
| brazzaville | cg      | Malebo Pool                                        | 0                 | 15.2847222  | -4.2591667  | 1115773    | 0                                                           | 0                   | 0             | 0              | 0           |
| brebes      | id      | Central & Eastern Java                             | 4                 | 109.0378000 | -6.8691000  | 186936     | 0                                                           | 0                   | 0             | 0              | 0           |
| breda       | nl      | Central & Western Europe                           | 13                | 4.8000000   | 51.5666670  | 168934     | 0                                                           | 0                   | 0             | 2              | 2           |
| bremen      | de      | Central & Western Europe                           | 13                | 8.8000000   | 53.0833330  | 546429     | 0                                                           | 0                   | 0             | 1              | 1           |
| bremerhaven | de      | Central & Western Europe                           | 13                | 8.5833330   | 53.5500000  | 119688     | 0                                                           | 0                   | 0             | 1              | 1           |
| brescia     | it      | Gulf of Venice Drainages                           | 8                 | 10.2500000  | 45.5500000  | 193713     | 0                                                           | 0                   | 0             | 2              | 2           |
| brist       | by      | Central & Western Europe                           | 13                | 23.7000000  | 52.1000000  | 300716     | 0                                                           | 0                   | 0             | 1              | 1           |
| brist       | fr      | Central & Western Europe                           | 13                | -4.4861650  | 48.3907560  | 150554     | 0                                                           | 0                   | 0             | 1              | 1           |
| bridgeport  | us      | Northeast US & Southeast Canada Atlantic Drainages | 18                | -73.2052778 | 41.1669444  | 139090     | 0                                                           | 0                   | 0             | 7              | 7           |
| brighton    | gb      | Central & Western Europe                           | 13                | -0.1500000  | 50.8333330  | 139001     | 0                                                           | 0                   | 0             | 1              | 1           |
| brikama     | gm      | Senegal - Gambia                                   | 4                 | -16.6461111 | 13.2675000  | 101805     | 1                                                           | 2                   | 0             | 0              | 3           |
| brisbane    | au      | Eastern Coastal Australia                          | 19                | 153.0242920 | -27.4710100 | 1843459    | 2                                                           | 0                   | 2             | 3              | 7           |
| bristol     | gb      | Central & Western Europe                           | 13                | -2.5833330  | 51.4500000  | 430714     | 0                                                           | 0                   | 0             | 2              | 2           |
| brits       | za      | Southern Temperate Highveld                        | 5                 | 27.7802240  | -25.6347310 | 122576     | 0                                                           | 1                   | 1             | 1              | 3           |
| brno        | cz      | Upper Danube                                       | 5                 | 16.6333330  | 49.2000000  | 377407     | 0                                                           | 0                   | 0             | 1              | 1           |
| brownsville | us      | Lower Rio Grande - Bravo                           | 14                | -97.4972222 | 25.9013889  | 168015     | 0                                                           | 1                   | 0             | 3              | 4           |
| brugge      | be      | Central & Western Europe                           | 13                | 3.2333330   | 51.2166670  | 116709     | 0                                                           | 0                   | 0             | 2              | 2           |
| brunswick   | de      | Central & Western Europe                           | 13                | 10.5333330  | 52.2666670  | 245259     | 0                                                           | 0                   | 0             | 1              | 1           |
| brussels    | be      | Central & Western Europe                           | 13                | 4.3333330   | 50.8333330  | 1019022    | 0                                                           | 0                   | 0             | 2              | 2           |
| bryansk     | ru      | Dnieper - South Bug                                | 2                 | 34.3716660  | 53.2520890  | 427241     | 0                                                           | 0                   | 0             | 0              | 0           |
| bucaramanga | co      | Magdalena - Sinu                                   | 15                | -73.1198040 | 7.1253930   | 571827     | 1                                                           | 0                   | 0             | 0              | 1           |

Table S2 Cities and freshwater reptiles

| City           | Country | Freshwater Ecoregions of the World (FEOW) Region | Regional richness | Longitude    | Latitude    | Population | # of freshwater reptile species within 50 km of city centre |                     |               |                |             |
|----------------|---------|--------------------------------------------------|-------------------|--------------|-------------|------------|-------------------------------------------------------------|---------------------|---------------|----------------|-------------|
|                |         |                                                  |                   |              |             |            | Lizard species                                              | Crocodilian species | Snake species | Turtle species | All species |
| bucharest      | ro      | Dniester - Lower Danube                          | 3                 | 26.1000000   | 44.4333330  | 1877155    | 0                                                           | 0                   | 0             | 2              | 2           |
| budapest       | hu      | Upper Danube                                     | 5                 | 19.0833330   | 47.5000000  | 1708088    | 0                                                           | 0                   | 0             | 0              | 0           |
| budaun         | in      | Ganges Delta & Plain                             | 13                | 79.1166670   | 28.0500000  | 161571     | 0                                                           | 0                   | 0             | 0              | 0           |
| buenaventura   | co      | North Andean Pacific Slopes - Rio Atrato         | 14                | -77.0311640  | 3.8800990   | 240391     | 4                                                           | 0                   | 0             | 1              | 5           |
| buffalo        | us      | Laurentian Great Lakes                           | 16                | -78.8786111  | 42.8863889  | 279557     | 0                                                           | 0                   | 0             | 4              | 4           |
| buga           | co      | Magdalena - Sinu                                 | 15                | -76.2978290  | 3.9008890   | 118006     | 4                                                           | 1                   | 0             | 0              | 5           |
| bugama         | ng      | Niger Delta                                      | 0                 | 6.8634510    | 4.7340710   | 135417     | 0                                                           | 0                   | 0             | 0              | 0           |
| buhe           | cn      | Lower Yangtze                                    | 4                 | 112.2297880  | 30.2875670  | 106347     | 0                                                           | 0                   | 0             | 0              | 0           |
| bujumbura      | bi      | Lake Tanganyika                                  | 3                 | 29.3600000   | -3.3761111  | 330539     | 0                                                           | 0                   | 0             | 0              | 0           |
| bukan          | ir      | Orumiyeh                                         | 0                 | 46.2089000   | 36.5210000  | 213349     | 0                                                           | 0                   | 0             | 0              | 0           |
| bukavu         | cd      | Lake Tanganyika                                  | 3                 | 28.8608330   | -2.5083330  | 225431     | 0                                                           | 0                   | 0             | 0              | 0           |
| bukit mertajam | my      | Northern Central Sumatra - Western Malaysia      | 7                 | 100.4667010  | 5.3630140   | 212387     | 1                                                           | 0                   | 0             | 2              | 3           |
| bulandshahr    | in      | Ganges Delta & Plain                             | 13                | 77.8500000   | 28.4000000  | 198631     | 0                                                           | 0                   | 0             | 0              | 0           |
| bulaon         | ph      | Northern Philippine Islands                      | 1                 | 120.6667000  | 15.0879000  | 131818     | 0                                                           | 0                   | 0             | 0              | 0           |
| bulawayo       | zw      | Zambezian Highveld                               | 3                 | 28.5833333   | -20.1500000 | 897249     | 0                                                           | 1                   | 0             | 0              | 1           |
| buon me thuot  | vn      | Kratie - Stung Treng (Mekong)                    | 0                 | 108.0500000  | 12.6666670  | 146986     | 0                                                           | 0                   | 0             | 0              | 0           |
| buraydah       | sa      | Arabian Interior                                 | 1                 | 43.9749660   | 26.3259860  | 341981     | 0                                                           | 0                   | 0             | 0              | 0           |
| burbank        | us      | Southern California Coastal - Baja California    | 12                | -118.3080556 | 34.1808333  | 104690     | 0                                                           | 0                   | 0             | 8              | 8           |
| burewala       | pk      | Lower & Middle Indus                             | 2                 | 72.6815120   | 30.1614230  | 183969     | 0                                                           | 0                   | 0             | 0              | 0           |
| burgas         | bg      | Dniester - Lower Danube                          | 3                 | 27.4666667   | 42.5000000  | 188554     | 0                                                           | 0                   | 0             | 2              | 2           |
| burgos         | es      | Western Iberia                                   | 6                 | -3.6752730   | 42.3502210  | 168319     | 0                                                           | 0                   | 0             | 2              | 2           |
| burhanpur      | in      | Namuda - Tapi                                    | 1                 | 76.2333330   | 21.3000000  | 202717     | 0                                                           | 0                   | 0             | 0              | 0           |
| bursa          | tr      | Thrace                                           | 3                 | 29.0611110   | 40.1916670  | 1413485    | 0                                                           | 0                   | 0             | 0              | 0           |
| bushehr        | ir      | Upper Tigris & Euphrates                         | 3                 | 50.8385000   | 28.9684000  | 157778     | 0                                                           | 0                   | 0             | 0              | 0           |

Table S2 Cities and freshwater reptiles

| City                    | Country | Freshwater Ecoregions of the World (FEOW) Region | Regional richness | Longitude   | Latitude    | Population | # of freshwater reptile species within 50 km of city centre |                     |               |                |             |
|-------------------------|---------|--------------------------------------------------|-------------------|-------------|-------------|------------|-------------------------------------------------------------|---------------------|---------------|----------------|-------------|
|                         |         |                                                  |                   |             |             |            | Lizard species                                              | Crocodilian species | Snake species | Turtle species | All species |
| butembo                 | cd      | Cuvette Centrale                                 | 0                 | 29.2833330  | 0.1500000   | 154649     | 0                                                           | 0                   | 0             | 0              | 0           |
| butterworth             | my      | Northern Central Sumatra - Western Malaysia      | 7                 | 100.3638180 | 5.3991020   | 107597     | 1                                                           | 0                   | 0             | 2              | 3           |
| butuan                  | ph      | Mindanao                                         | 1                 | 125.5436110 | 8.9491670   | 250200     | 0                                                           | 0                   | 0             | 0              | 0           |
| buzau                   | ro      | Dniester - Lower Danube                          | 3                 | 26.8333330  | 45.1500000  | 130955     | 0                                                           | 0                   | 0             | 1              | 1           |
| bydgoszcz               | pl      | Central & Western Europe                         | 13                | 18.0199870  | 53.1270620  | 366452     | 0                                                           | 0                   | 0             | 1              | 1           |
| bytom                   | pl      | Central & Western Europe                         | 13                | 18.9328220  | 50.3480170  | 189186     | 0                                                           | 0                   | 0             | 1              | 1           |
| ca mau                  | vn      | Mekong Delta                                     | 3                 | 105.1500000 | 9.1769440   | 111903     | 0                                                           | 0                   | 0             | 0              | 0           |
| cabanatuan              | ph      | Northern Philippine Islands                      | 1                 | 120.9676000 | 15.4867000  | 220095     | 0                                                           | 0                   | 0             | 0              | 0           |
| cabimas                 | ve      | Maracaibo                                        | 0                 | -71.4461111 | 10.4019444  | 200859     | 0                                                           | 0                   | 0             | 0              | 0           |
| cabo frio               | br      | Fluminense                                       | 1                 | -42.0166670 | -22.8833330 | 108241     | 0                                                           | 0                   | 0             | 0              | 0           |
| cabudare                | ve      | Orinoco Piedmont                                 | 10                | -69.0894444 | 10.0288889  | 131013     | 0                                                           | 1                   | 0             | 0              | 1           |
| cachoeirinha            | br      | Laguna dos Patos                                 | 2                 | -51.0833330 | -29.9500000 | 121086     | 0                                                           | 0                   | 0             | 0              | 0           |
| cachoeiro de itapemirim | br      | Northeastern Mata Atlantica                      | 1                 | -41.1000000 | -20.8500000 | 187023     | 0                                                           | 0                   | 0             | 0              | 0           |
| cadiz                   | ph      | Northern Philippine Islands                      | 1                 | 123.2880000 | 10.9465000  | 131106     | 0                                                           | 0                   | 0             | 3              | 3           |
| cadiz                   | es      | Southern Iberia                                  | 8                 | -6.2796920  | 36.5157890  | 137698     | 0                                                           | 0                   | 0             | 3              | 3           |
| caen                    | fr      | Central & Western Europe                         | 13                | -0.3268220  | 49.1971880  | 115358     | 0                                                           | 0                   | 0             | 0              | 0           |
| cagayan de oro          | ph      | Mindanao                                         | 1                 | 124.6430560 | 8.4811110   | 445212     | 0                                                           | 0                   | 0             | 0              | 0           |
| cagliari                | it      | Italian Peninsula & Islands                      | 6                 | 9.1166670   | 39.2166670  | 157343     | 0                                                           | 0                   | 0             | 0              | 0           |
| cagua                   | ve      | Orinoco Piedmont                                 | 10                | -67.4500000 | 10.1833333  | 119052     | 0                                                           | 0                   | 0             | 1              | 1           |
| cainta                  | ph      | Northern Philippine Islands                      | 1                 | 121.1222000 | 14.5786000  | 283177     | 0                                                           | 0                   | 0             | 0              | 0           |
| cairns                  | au      | Arafura - Carpentaria                            | 23                | 145.7662510 | -16.9230400 | 154318     | 3                                                           | 1                   | 3             | 3              | 10          |
| cairo                   | eg      | Nile Delta                                       | 0                 | 31.2500000  | 30.0500000  | 7734602    | 0                                                           | 0                   | 0             | 0              | 0           |
| cajamarca               | pe      | Amazonas High Andes                              | 1                 | -78.5166667 | -7.1666667  | 132622     | 0                                                           | 0                   | 0             | 0              | 0           |
| calabar                 | ng      | Northern Gulf of Guinea Drainages - Bioko        | 1                 | 8.3220000   | 4.9517000   | 461832     | 0                                                           | 0                   | 0             | 0              | 0           |

Table S2 Cities and freshwater reptiles

| City           | Country | Freshwater Ecoregions of the World (FEOW) Region   | Regional richness | Longitude    | Latitude    | Population | # of freshwater reptile species within 50 km of city centre |                     |               |                |             |
|----------------|---------|----------------------------------------------------|-------------------|--------------|-------------|------------|-------------------------------------------------------------|---------------------|---------------|----------------|-------------|
|                |         |                                                    |                   |              |             |            | Lizard species                                              | Crocodilian species | Snake species | Turtle species | All species |
| calabozo       | ve      | Orinoco Llanos                                     | 15                | -67.4266667  | 8.9344444   | 117148     | 0                                                           | 1                   | 0             | 0              | 1           |
| calama         | cl      | Atacama                                            | 0                 | -68.9333330  | -22.4666670 | 143085     | 0                                                           | 0                   | 0             | 0              | 0           |
| calamba        | ph      | Northern Philippine Islands                        | 1                 | 121.1655000  | 14.2118000  | 316633     | 0                                                           | 0                   | 0             | 0              | 0           |
| calcutta       | in      | Ganges Delta & Plain                               | 13                | 88.3697220   | 22.5697220  | 4631819    | 1                                                           | 0                   | 0             | 0              | 1           |
| calgary        | ca      | Upper Saskatchewan                                 | 0                 | -114.0833330 | 51.0833330  | 968475     | 0                                                           | 0                   | 0             | 1              | 1           |
| cali           | co      | Magdalena - Sinu                                   | 15                | -76.5225000  | 3.4372220   | 2392897    | 1                                                           | 1                   | 0             | 1              | 3           |
| cam pha        | vn      | Xi Yang                                            | 15                | 107.3166670  | 21.0166670  | 135487     | 0                                                           | 0                   | 0             | 0              | 0           |
| cam ranh       | vn      | Southern Annam                                     | 2                 | 109.1500000  | 11.9000000  | 146771     | 0                                                           | 0                   | 0             | 0              | 0           |
| camacari       | br      | Northeastern Mata Atlantica                        | 1                 | -38.2166670  | -12.4833330 | 188763     | 0                                                           | 0                   | 1             | 0              | 1           |
| camaguey       | cu      | Cuba - Cayman Islands                              | 2                 | -77.9169444  | 21.3808333  | 347572     | 0                                                           | 0                   | 0             | 0              | 0           |
| camaragibe     | br      | Northeastern Caatinga & Coastal Drainages          | 1                 | -34.9666670  | -8.0166670  | 148966     | 0                                                           | 0                   | 0             | 0              | 0           |
| cambridge      | gb      | Central & Western Europe                           | 13                | 0.1166670    | 52.2000000  | 128489     | 0                                                           | 0                   | 0             | 7              | 7           |
| cambridge      | us      | Northeast US & Southeast Canada Atlantic Drainages | 18                | -71.1061111  | 42.3750000  | 101382     | 0                                                           | 0                   | 0             | 7              | 7           |
| campeche       | mx      | Yucatan                                            | 15                | -90.5333330  | 19.8500000  | 205221     | 0                                                           | 1                   | 0             | 2              | 3           |
| campina grande | br      | Northeastern Caatinga & Coastal Drainages          | 1                 | -35.8833330  | -7.2166670  | 348943     | 0                                                           | 0                   | 0             | 0              | 0           |
| campinas       | br      | Upper Parana                                       | 3                 | -47.0833330  | -22.9000000 | 1031573    | 0                                                           | 0                   | 0             | 1              | 1           |
| campo grande   | br      | Upper Parana                                       | 3                 | -54.6166670  | -20.4500000 | 729164     | 0                                                           | 0                   | 0             | 0              | 0           |
| campos         | br      | Paraiba do Sul                                     | 0                 | -41.3000000  | -21.7500000 | 387422     | 0                                                           | 0                   | 0             | 0              | 0           |
| can tho        | vn      | Mekong Delta                                       | 3                 | 105.7833330  | 10.0333330  | 259608     | 0                                                           | 0                   | 0             | 0              | 0           |
| canberra       | au      | Murray - Darling                                   | 11                | 149.1343500  | -35.2760300 | 324025     | 4                                                           | 0                   | 2             | 2              | 8           |
| cancun         | mx      | Yucatan                                            | 15                | -86.8333330  | 21.1666670  | 542156     | 1                                                           | 2                   | 0             | 4              | 7           |
| cangzhou       | cn      | Lower Huang He                                     | 0                 | 116.8666670  | 38.3166670  | 527681     | 0                                                           | 0                   | 0             | 0              | 0           |
| canoas         | br      | Laguna dos Patos                                   | 2                 | -51.1833330  | -29.9333330 | 328297     | 0                                                           | 0                   | 0             | 0              | 0           |
| cape coast     | gh      | Ashanti                                            | 1                 | -1.2500000   | 5.1000000   | 143044     | 0                                                           | 0                   | 0             | 0              | 0           |

Table S2 Cities and freshwater reptiles

| City        | Country | Freshwater Ecoregions of the World (FEOW) Region | Regional richness | Longitude   | Latitude    | Population | # of freshwater reptile species within 50 km of city centre |                     |               |                |             |
|-------------|---------|--------------------------------------------------|-------------------|-------------|-------------|------------|-------------------------------------------------------------|---------------------|---------------|----------------|-------------|
|             |         |                                                  |                   |             |             |            | Lizard species                                              | Crocodilian species | Snake species | Turtle species | All species |
| cape coral  | us      | Florida Peninsula                                | 30                | -81.9497222 | 26.5625000  | 130807     | 2                                                           | 1                   | 1             | 8              | 12          |
| cape town   | za      | Cape Fold                                        | 3                 | 18.4232180  | -33.9258390 | 3433504    | 0                                                           | 0                   | 1             | 1              | 2           |
| cap-haitien | ht      | Hispaniola                                       | 5                 | -72.2041667 | 19.7577778  | 134823     | 0                                                           | 0                   | 0             | 0              | 0           |
| capiata     | py      | Paraguay                                         | 8                 | -57.4166670 | -25.3500000 | 198801     | 0                                                           | 1                   | 0             | 0              | 1           |
| caracas     | ve      | South America Caribbean Drainages - Trinidad     | 6                 | -66.9166667 | 10.5000000  | 1815681    | 0                                                           | 0                   | 0             | 0              | 0           |
| carapicuiba | br      | Upper Parana                                     | 3                 | -46.8333330 | -23.5166670 | 361120     | 0                                                           | 0                   | 0             | 1              | 1           |
| cardiff     | gb      | Northern British Isles                           | 1                 | -3.2000000  | 51.5000000  | 302142     | 0                                                           | 0                   | 0             | 2              | 2           |
| cariacica   | br      | Northeastern Mata Atlantica                      | 1                 | -40.4166670 | -20.2666670 | 330681     | 0                                                           | 0                   | 0             | 0              | 0           |
| carmen      | mx      | Grijalva - Usumacinta                            | 18                | -91.8333330 | 18.6333330  | 141315     | 0                                                           | 1                   | 0             | 6              | 7           |
| carolina    | us      | Puerto Rico - Virgin Islands                     | 2                 | -65.9577778 | 18.3827778  | 170408     | 0                                                           | 0                   | 0             | 2              | 2           |
| carrefour   | ht      | Hispaniola                                       | 5                 | -72.4122222 | 18.5383333  | 439590     | 0                                                           | 0                   | 0             | 0              | 0           |
| carrollton  | us      | Sabine - Galveston                               | 29                | -96.8900000 | 32.9536111  | 120792     | 0                                                           | 1                   | 1             | 14             | 16          |
| cartagena   | co      | Magdalena - Sinu                                 | 15                | -75.5144440 | 10.3997220  | 952036     | 1                                                           | 1                   | 0             | 1              | 3           |
| cartagena   | es      | Southern Iberia                                  | 8                 | -0.9862320  | 37.6051210  | 201977     | 1                                                           | 1                   | 0             | 1              | 3           |
| cartago     | co      | Magdalena - Sinu                                 | 15                | -75.9116670 | 4.7463890   | 134829     | 0                                                           | 0                   | 0             | 1              | 1           |
| caruaru     | br      | Northeastern Caatinga & Coastal Drainages        | 1                 | -35.9666670 | -8.2833330  | 235375     | 0                                                           | 0                   | 0             | 0              | 0           |
| carupano    | ve      | South America Caribbean Drainages - Trinidad     | 6                 | -63.2491667 | 10.6697222  | 112102     | 0                                                           | 0                   | 0             | 0              | 0           |
| cary        | us      | Appalachian Piedmont                             | 26                | -78.7813889 | 35.7913889  | 103945     | 0                                                           | 0                   | 0             | 8              | 8           |
| casablanca  | ma      | Atlantic Northwest Africa                        | 3                 | -7.6191570  | 33.5927790  | 3609698    | 0                                                           | 0                   | 0             | 1              | 1           |
| cascavel    | br      | Upper Parana                                     | 3                 | -53.4666670 | -24.9500000 | 257174     | 0                                                           | 0                   | 0             | 0              | 0           |
| castanhal   | br      | Amazonas Estuary & Coastal Drainages             | 0                 | -47.9166670 | -1.3000000  | 137410     | 0                                                           | 0                   | 0             | 0              | 0           |
| catamarca   | ar      | Mar Chiquita - Salinas Grandes                   | 1                 | -65.7852390 | -28.4695740 | 213601     | 0                                                           | 0                   | 0             | 0              | 0           |
| catanduva   | br      | Upper Parana                                     | 3                 | -48.9666670 | -21.1333330 | 109615     | 0                                                           | 0                   | 0             | 0              | 0           |
| catania     | it      | Italian Peninsula & Islands                      | 6                 | 15.1000000  | 37.5000000  | 307331     | 0                                                           | 0                   | 0             | 0              | 0           |

Table S2 Cities and freshwater reptiles

| City          | Country | Freshwater Ecoregions of the World (FEOW) Region | Regional richness | Longitude    | Latitude    | Population | # of freshwater reptile species within 50 km of city centre |                     |               |                |             |
|---------------|---------|--------------------------------------------------|-------------------|--------------|-------------|------------|-------------------------------------------------------------|---------------------|---------------|----------------|-------------|
|               |         |                                                  |                   |              |             |            | Lizard species                                              | Crocodilian species | Snake species | Turtle species | All species |
| catia la mar  | ve      | South America Caribbean Drainages - Trinidad     | 6                 | -67.0333333  | 10.6000000  | 106850     | 0                                                           | 0                   | 0             | 0              | 0           |
| caucaia       | br      | Northeastern Caatinga & Coastal Drainages        | 1                 | -38.6500000  | -3.7000000  | 275023     | 0                                                           | 0                   | 0             | 0              | 0           |
| cavite        | ph      | Northern Philippine Islands                      | 1                 | 120.8932220  | 14.4778310  | 115920     | 0                                                           | 0                   | 0             | 0              | 0           |
| caxias        | br      | Amazonas Estuary & Coastal Drainages             | 0                 | -43.3500000  | -4.8333330  | 117393     | 0                                                           | 0                   | 0             | 0              | 0           |
| caxias do sul | br      | Laguna dos Patos                                 | 2                 | -51.1785000  | -29.1689000 | 381277     | 0                                                           | 0                   | 0             | 0              | 0           |
| cebu          | ph      | Northern Philippine Islands                      | 1                 | 123.8916670  | 10.3111110  | 758597     | 0                                                           | 0                   | 0             | 0              | 0           |
| cedar rapids  | us      | Upper Mississippi                                | 20                | -91.6438889  | 42.0083333  | 122945     | 0                                                           | 0                   | 0             | 4              | 4           |
| celaya        | mx      | Lerma - Chapala                                  | 10                | -100.8166670 | 20.5166670  | 305913     | 0                                                           | 0                   | 0             | 2              | 2           |
| chakwal       | pk      | Lower & Middle Indus                             | 2                 | 72.8585310   | 32.9333760  | 101230     | 0                                                           | 0                   | 0             | 0              | 0           |
| chalco        | mx      | Lerma - Chapala                                  | 10                | -98.9000000  | 19.2666670  | 164003     | 0                                                           | 0                   | 0             | 5              | 5           |
| champdani     | in      | Ganges Delta & Plain                             | 13                | 88.3658330   | 22.7977780  | 103699     | 1                                                           | 0                   | 0             | 0              | 1           |
| chandannagar  | in      | Ganges Delta & Plain                             | 13                | 88.3772220   | 22.8691670  | 180640     | 1                                                           | 0                   | 0             | 0              | 1           |
| chandausi     | in      | Ganges Delta & Plain                             | 13                | 78.7666670   | 28.4500000  | 112646     | 0                                                           | 0                   | 0             | 0              | 0           |
| chandigarh    | in      | Lower & Middle Indus                             | 2                 | 76.7933000   | 30.7343000  | 914374     | 0                                                           | 0                   | 0             | 0              | 0           |
| chandler      | us      | Gila                                             | 10                | -111.8405556 | 33.3061111  | 234297     | 0                                                           | 0                   | 0             | 1              | 1           |
| chandpur      | bd      | Ganges Delta & Plain                             | 13                | 90.7166667   | 23.1500000  | 120183     | 0                                                           | 0                   | 0             | 0              | 0           |
| chandrapur    | in      | Northern Deccan Plateau                          | 2                 | 79.3000000   | 19.9500000  | 328377     | 0                                                           | 0                   | 0             | 0              | 0           |
| changchun     | cn      | Songhua Jiang                                    | 0                 | 125.3227780  | 43.8800000  | 2537421    | 0                                                           | 0                   | 0             | 0              | 0           |
| changde       | cn      | Lower Yangtze                                    | 4                 | 111.6783040  | 29.0463780  | 517780     | 0                                                           | 0                   | 0             | 0              | 0           |
| changji       | cn      | Dzungaria                                        | 0                 | 87.3166670   | 44.0166670  | 198776     | 0                                                           | 0                   | 0             | 0              | 0           |
| changzhou     | cn      | Lower Yangtze                                    | 4                 | 119.9666670  | 31.7833330  | 949018     | 0                                                           | 0                   | 0             | 0              | 0           |
| chaohu        | cn      | Lower Yangtze                                    | 4                 | 117.8666670  | 31.6000000  | 138463     | 0                                                           | 0                   | 0             | 0              | 0           |
| chaoyang      | cn      | Liao He                                          | 0                 | 120.4586110  | 41.5702780  | 410005     | 0                                                           | 0                   | 0             | 0              | 0           |
| chaozhou      | cn      | Coastal Fujian - Zeijang                         | 1                 | 116.6378640  | 23.6651290  | 424787     | 0                                                           | 0                   | 0             | 0              | 0           |

Table S2 Cities and freshwater reptiles

| City           | Country | Freshwater Ecoregions of the World (FEOW) Region | Regional richness | Longitude   | Latitude    | Population | # of freshwater reptile species within 50 km of city centre |                     |               |                |             |
|----------------|---------|--------------------------------------------------|-------------------|-------------|-------------|------------|-------------------------------------------------------------|---------------------|---------------|----------------|-------------|
|                |         |                                                  |                   |             |             |            | Lizard species                                              | Crocodilian species | Snake species | Turtle species | All species |
| chapeco        | br      | Upper Uruguay                                    | 0                 | -52.9833330 | -27.0833330 | 160160     | 0                                                           | 0                   | 0             | 0              | 0           |
| charallave     | ve      | South America Caribbean Drainages - Trinidad     | 6                 | -66.8566667 | 10.2483333  | 129213     | 0                                                           | 0                   | 0             | 0              | 0           |
| charleroi      | be      | Central & Western Europe                         | 13                | 4.4333330   | 50.4166670  | 200132     | 0                                                           | 0                   | 0             | 1              | 1           |
| charleston     | us      | Appalachian Piedmont                             | 26                | -79.9311111 | 32.7763889  | 104782     | 0                                                           | 1                   | 1             | 10             | 12          |
| charlotte      | us      | Appalachian Piedmont                             | 26                | -80.8433333 | 35.2269444  | 598351     | 0                                                           | 0                   | 0             | 8              | 8           |
| chas           | in      | Ganges Delta & Plain                             | 13                | 86.1666670  | 23.6333330  | 112153     | 0                                                           | 0                   | 0             | 0              | 0           |
| chattanooga    | us      | Tennessee                                        | 17                | -85.3097222 | 35.0455556  | 154024     | 0                                                           | 0                   | 0             | 5              | 5           |
| chavakachcheri | lk      | Sri Lanka Dry Zone                               | 5                 | 80.1500000  | 9.6500000   | 121897     | 0                                                           | 0                   | 0             | 0              | 0           |
| cheboksary     | ru      | Volga - Ural                                     | 0                 | 47.2519440  | 56.1322220  | 446786     | 0                                                           | 0                   | 0             | 0              | 0           |
| chelmsford     | gb      | Central & Western Europe                         | 13                | 0.4833330   | 51.7333330  | 102671     | 0                                                           | 0                   | 0             | 2              | 2           |
| cheltenham     | gb      | Central & Western Europe                         | 13                | -2.0833330  | 51.9000000  | 103249     | 0                                                           | 0                   | 0             | 1              | 1           |
| chelyabinsk    | ru      | Ob                                               | 0                 | 61.4297220  | 55.1544440  | 1062931    | 0                                                           | 0                   | 0             | 0              | 0           |
| chemnitz       | de      | Central & Western Europe                         | 13                | 12.9166670  | 50.8333330  | 246654     | 0                                                           | 0                   | 0             | 1              | 1           |
| chengde        | cn      | Lower Huang He                                   | 0                 | 118.1697220 | 40.7702780  | 449325     | 0                                                           | 0                   | 0             | 0              | 0           |
| chengdu        | cn      | Middle Yangtze                                   | 1                 | 104.0666670 | 30.6666670  | 3950437    | 0                                                           | 0                   | 0             | 1              | 1           |
| chenghai       | cn      | Coastal Fujian - Zeijang                         | 1                 | 116.7700710 | 23.4613190  | 152453     | 0                                                           | 0                   | 0             | 0              | 0           |
| chenzhou       | cn      | Lower Yangtze                                    | 4                 | 113.0333330 | 25.8000000  | 179038     | 0                                                           | 0                   | 0             | 0              | 0           |
| cherepovets    | ru      | Volga - Ural                                     | 0                 | 37.9000000  | 59.1333330  | 311854     | 0                                                           | 0                   | 0             | 0              | 0           |
| cherkasy       | ua      | Dnieper - South Bug                              | 2                 | 32.0620700  | 49.4285360  | 297566     | 0                                                           | 0                   | 0             | 0              | 0           |
| cherkessk      | ru      | Kuban                                            | 0                 | 42.0577780  | 44.2233330  | 117157     | 0                                                           | 0                   | 0             | 0              | 0           |
| chernihiv      | ua      | Dnieper - South Bug                              | 2                 | 31.2848750  | 51.5055070  | 307683     | 0                                                           | 0                   | 0             | 0              | 0           |
| chernivtsi     | ua      | Dniester - Lower Danube                          | 3                 | 25.9403410  | 48.2914880  | 236249     | 0                                                           | 0                   | 0             | 0              | 0           |
| chesapeake     | us      | Appalachian Piedmont                             | 26                | -76.2752778 | 36.8188889  | 219124     | 0                                                           | 1                   | 1             | 11             | 13          |
| chetumal       | mx      | Quintana Roo - Motagua                           | 16                | -88.3000000 | 18.5000000  | 134464     | 1                                                           | 1                   | 0             | 5              | 7           |
| chhapra        | in      | Ganges Delta & Plain                             | 13                | 84.7500000  | 25.7666670  | 197350     | 0                                                           | 0                   | 0             | 0              | 0           |

Table S2 Cities and freshwater reptiles

| City            | Country | Freshwater Ecoregions of the World (FEOW) Region | Regional richness | Longitude    | Latitude    | Population | # of freshwater reptile species within 50 km of city centre |                     |               |                |             |
|-----------------|---------|--------------------------------------------------|-------------------|--------------|-------------|------------|-------------------------------------------------------------|---------------------|---------------|----------------|-------------|
|                 |         |                                                  |                   |              |             |            | Lizard species                                              | Crocodilian species | Snake species | Turtle species | All species |
| chhatarpur      | in      | Ganges Delta & Plain                             | 13                | 79.6000000   | 24.9000000  | 111606     | 0                                                           | 0                   | 0             | 0              | 0           |
| chhindwara      | in      | Northern Deccan Plateau                          | 2                 | 78.9333330   | 22.0666670  | 134862     | 0                                                           | 0                   | 0             | 0              | 0           |
| chiang mai      | th      | Chao Phraya                                      | 12                | 98.9846830   | 18.7903760  | 200952     | 0                                                           | 0                   | 0             | 2              | 2           |
| chicago         | us      | Laurentian Great Lakes                           | 16                | -87.6500000  | 41.8500000  | 2841952    | 0                                                           | 0                   | 0             | 6              | 6           |
| chiclayo        | pe      | Central Andean Pacific Slopes                    | 0                 | -79.8416667  | -6.7736111  | 582597     | 0                                                           | 0                   | 0             | 0              | 0           |
| chifeng         | cn      | Liao He                                          | 0                 | 118.9636110  | 42.2683330  | 346654     | 0                                                           | 0                   | 0             | 0              | 0           |
| chigasaki       | jp      | Honshu - Shikoku - Kyushu                        | 5                 | 139.4038890  | 35.3261110  | 231660     | 0                                                           | 0                   | 0             | 1              | 1           |
| chihuahua       | mx      | Rio Conchos                                      | 2                 | -106.0833330 | 28.6333330  | 708292     | 0                                                           | 0                   | 0             | 0              | 0           |
| chikmagalur     | in      | Southern Deccan Plateau                          | 0                 | 75.7833330   | 13.3166670  | 121494     | 0                                                           | 0                   | 0             | 0              | 0           |
| chillan         | cl      | South Andean Pacific Slopes                      | 0                 | -72.1166670  | -36.6000000 | 150396     | 0                                                           | 0                   | 0             | 0              | 0           |
| chilpancingo    | mx      | Sierra Madre del Sur                             | 12                | -99.5000000  | 17.5500000  | 165257     | 0                                                           | 0                   | 0             | 0              | 0           |
| chimalhuacan    | mx      | Lerma - Chapala                                  | 10                | -98.9000000  | 19.4166670  | 590165     | 0                                                           | 0                   | 0             | 5              | 5           |
| chimbote        | pe      | Central Andean Pacific Slopes                    | 0                 | -78.6000000  | -9.0833333  | 320119     | 0                                                           | 0                   | 0             | 0              | 0           |
| chimoio         | mz      | Eastern Zimbabwe Highlands                       | 1                 | 33.4833333   | -19.1163889 | 256992     | 0                                                           | 0                   | 0             | 0              | 0           |
| chinandega      | ni      | Estero Real - Tempisque                          | 7                 | -87.1500000  | 12.6166667  | 128616     | 0                                                           | 0                   | 0             | 0              | 0           |
| chinchalta      | pe      | Central Andean Pacific Slopes                    | 0                 | -76.1333333  | -13.4500000 | 154561     | 0                                                           | 0                   | 0             | 0              | 0           |
| chingola        | zm      | Zambeian Headwaters                              | 1                 | 27.8500000   | -12.5333333 | 148583     | 0                                                           | 0                   | 0             | 0              | 0           |
| chiniot         | pk      | Lower & Middle Indus                             | 2                 | 72.9788890   | 31.7200000  | 201840     | 0                                                           | 0                   | 0             | 0              | 0           |
| chishtian mandi | pk      | Lower & Middle Indus                             | 2                 | 72.8666670   | 29.8000000  | 122235     | 0                                                           | 0                   | 0             | 0              | 0           |
| chisinau        | md      | Dniester - Lower Danube                          | 3                 | 28.8575000   | 47.0055560  | 713805     | 0                                                           | 0                   | 0             | 0              | 0           |
| chita           | ru      | Shilka (Amur)                                    | 0                 | 113.5008670  | 52.0317120  | 308294     | 0                                                           | 0                   | 0             | 0              | 0           |
| chitradurga     | in      | Southern Deccan Plateau                          | 0                 | 76.4000000   | 14.2333330  | 138599     | 0                                                           | 0                   | 0             | 0              | 0           |
| chittaurgarh    | in      | Ganges Delta & Plain                             | 13                | 74.6333330   | 24.8833330  | 106718     | 0                                                           | 0                   | 0             | 0              | 0           |
| chitungwiza     | zw      | Zambeian Highveld                                | 3                 | 31.0480556   | -17.9938889 | 456206     | 1                                                           | 0                   | 0             | 0              | 1           |
| chizhou         | cn      | Lower Yangtze                                    | 4                 | 117.4830560  | 30.6577780  | 148375     | 0                                                           | 0                   | 0             | 0              | 0           |

Table S2 Cities and freshwater reptiles

| City           | Country | Freshwater Ecoregions of the World (FEOW) Region | Regional richness | Longitude    | Latitude    | Population | # of freshwater reptile species within 50 km of city centre |                     |               |                |             |
|----------------|---------|--------------------------------------------------|-------------------|--------------|-------------|------------|-------------------------------------------------------------|---------------------|---------------|----------------|-------------|
|                |         |                                                  |                   |              |             |            | Lizard species                                              | Crocodilian species | Snake species | Turtle species | All species |
| chofu          | jp      | Honshu - Shikoku - Kyushu                        | 5                 | 139.5522220  | 35.6555560  | 212978     | 0                                                           | 0                   | 0             | 3              | 3           |
| choloma        | hn      | Mosquitia                                        | 3                 | -87.9500000  | 15.6166667  | 139117     | 0                                                           | 0                   | 0             | 0              | 0           |
| chon buri      | th      | Chao Phraya                                      | 12                | 100.9834540  | 13.3621990  | 219190     | 1                                                           | 0                   | 0             | 2              | 3           |
| chongqing      | cn      | Middle Yangtze                                   | 1                 | 106.5527780  | 29.5627780  | 3967028    | 0                                                           | 0                   | 0             | 0              | 0           |
| chorzow        | pl      | Central & Western Europe                         | 13                | 18.9742030   | 50.3058170  | 113430     | 0                                                           | 0                   | 0             | 1              | 1           |
| chosica        | pe      | Central Andean Pacific Slopes                    | 0                 | -76.7094444  | -11.9430556 | 110536     | 0                                                           | 0                   | 0             | 0              | 0           |
| christchurch   | nz      | New Zealand                                      | 2                 | 172.6333330  | -43.5333330 | 363925     | 0                                                           | 0                   | 0             | 0              | 0           |
| chula vista    | us      | Southern California Coastal - Baja California    | 12                | -117.0833333 | 32.6400000  | 213032     | 0                                                           | 0                   | 0             | 5              | 5           |
| chuncheng      | cn      | Xi Yang                                          | 15                | 111.7833330  | 22.1666670  | 153547     | 0                                                           | 0                   | 0             | 0              | 0           |
| chungho        | tw      | Western Taiwan                                   | 2                 | 121.4727778  | 24.9944444  | 378389     | 0                                                           | 0                   | 0             | 2              | 2           |
| chupei         | tw      | Western Taiwan                                   | 2                 | 121.0000000  | 24.8333333  | 106065     | 0                                                           | 0                   | 0             | 1              | 1           |
| churu          | in      | Lower & Middle Indus                             | 2                 | 74.9500000   | 28.3000000  | 103541     | 0                                                           | 0                   | 0             | 0              | 0           |
| chuzhou        | cn      | Lower Yangtze                                    | 4                 | 118.2977780  | 32.3219440  | 280582     | 0                                                           | 0                   | 0             | 0              | 0           |
| ciamis         | id      | Indian Ocean Slope of Sumatra & Java             | 9                 | 108.3534000  | -7.3257000  | 123631     | 1                                                           | 0                   | 0             | 1              | 2           |
| ciampea        | id      | Southern Sumatra - Western Java                  | 8                 | 106.6955560  | -6.5402780  | 207445     | 1                                                           | 0                   | 2             | 0              | 3           |
| cianjur        | id      | Southern Sumatra - Western Java                  | 8                 | 107.1394440  | -6.8222220  | 146883     | 1                                                           | 0                   | 0             | 0              | 1           |
| cibadak        | id      | Southern Sumatra - Western Java                  | 8                 | 106.7702780  | -6.5363890  | 229745     | 1                                                           | 2                   | 2             | 0              | 5           |
| cibinong       | id      | Southern Sumatra - Western Java                  | 8                 | 106.6886110  | -6.3986110  | 188674     | 1                                                           | 2                   | 2             | 0              | 5           |
| cibitung       | id      | Southern Sumatra - Western Java                  | 8                 | 107.1036110  | -6.2722220  | 198119     | 1                                                           | 2                   | 2             | 0              | 5           |
| cicalengka     | id      | Southern Sumatra - Western Java                  | 8                 | 107.4702780  | -6.9322220  | 158211     | 0                                                           | 0                   | 0             | 0              | 0           |
| ciego de avila | cu      | Cuba - Cayman Islands                            | 2                 | -78.7619444  | 21.8400000  | 142032     | 0                                                           | 0                   | 0             | 0              | 0           |
| cienfuegos     | cu      | Cuba - Cayman Islands                            | 2                 | -80.4355556  | 22.1461111  | 186648     | 0                                                           | 0                   | 0             | 0              | 0           |
| cikampek       | id      | Southern Sumatra - Western Java                  | 8                 | 107.4558330  | -6.4197220  | 145613     | 0                                                           | 0                   | 0             | 0              | 0           |

Table S2 Cities and freshwater reptiles

| City             | Country | Freshwater Ecoregions of the World (FEOW) Region | Regional richness | Longitude   | Latitude   | Population | # of freshwater reptile species within 50 km of city centre |                     |               |                |             |
|------------------|---------|--------------------------------------------------|-------------------|-------------|------------|------------|-------------------------------------------------------------|---------------------|---------------|----------------|-------------|
|                  |         |                                                  |                   |             |            |            | Lizard species                                              | Crocodilian species | Snake species | Turtle species | All species |
| cikarang         | id      | Southern Sumatra - Western Java                  | 8                 | 107.1527780 | -6.2611110 | 106486     | 1                                                           | 2                   | 2             | 0              | 5           |
| cikupa           | id      | Southern Sumatra - Western Java                  | 8                 | 106.5194440 | -6.2288890 | 174184     | 1                                                           | 2                   | 2             | 0              | 5           |
| cikupa           | id      | Southern Sumatra - Western Java                  | 8                 | 106.1945000 | -6.3724000 | 174184     | 1                                                           | 2                   | 2             | 0              | 5           |
| cilegon          | id      | Southern Sumatra - Western Java                  | 8                 | 106.0542000 | -6.0144000 | 299790     | 0                                                           | 0                   | 0             | 0              | 0           |
| cileungsi        | id      | Southern Sumatra - Western Java                  | 8                 | 106.9591670 | -6.3947220 | 202360     | 1                                                           | 2                   | 2             | 0              | 5           |
| cileunyi         | id      | Southern Sumatra - Western Java                  | 8                 | 107.8519440 | -6.7938890 | 111570     | 0                                                           | 0                   | 0             | 0              | 0           |
| cimahi           | id      | Southern Sumatra - Western Java                  | 8                 | 107.2752780 | -6.6983330 | 378027     | 1                                                           | 0                   | 0             | 0              | 1           |
| cincinnati       | us      | Teays - Old Ohio                                 | 17                | -84.4569444 | 39.1619444 | 306382     | 0                                                           | 0                   | 0             | 6              | 6           |
| ciomas           | id      | Southern Sumatra - Western Java                  | 8                 | 106.7713890 | -6.6013890 | 152335     | 1                                                           | 0                   | 2             | 0              | 3           |
| ciparay          | id      | Southern Sumatra - Western Java                  | 8                 | 107.3491670 | -6.9416670 | 114226     | 1                                                           | 0                   | 0             | 0              | 1           |
| ciputat          | id      | Southern Sumatra - Western Java                  | 8                 | 106.6955560 | -6.2375000 | 207848     | 1                                                           | 2                   | 2             | 0              | 5           |
| cirebon          | id      | Southern Sumatra - Western Java                  | 8                 | 108.5570000 | -6.7063000 | 254314     | 0                                                           | 0                   | 0             | 0              | 0           |
| cisaat           | id      | Indian Ocean Slope of Sumatra & Java             | 9                 | 106.7713890 | -6.7752780 | 141005     | 1                                                           | 0                   | 1             | 0              | 2           |
| cisarua          | id      | Southern Sumatra - Western Java                  | 8                 | 107.1205560 | -6.4483330 | 103933     | 1                                                           | 2                   | 2             | 0              | 5           |
| citeureup        | id      | Southern Sumatra - Western Java                  | 8                 | 106.6752780 | -6.3627780 | 110162     | 1                                                           | 2                   | 2             | 0              | 5           |
| ciudad bolivar   | ve      | Orinoco Llanos                                   | 15                | -63.5497222 | 8.1222222  | 291170     | 0                                                           | 0                   | 0             | 0              | 0           |
| ciudad guayana   | ve      | Orinoco Delta & Coastal Drainages                | 0                 | -62.6527778 | 8.3533333  | 746606     | 0                                                           | 0                   | 0             | 0              | 0           |
| ciudad valles    | mx      | Panuco                                           | 12                | -99.0166670 | 21.9833330 | 109508     | 0                                                           | 1                   | 0             | 3              | 4           |
| clarksville      | us      | Cumberland                                       | 9                 | -87.3594444 | 36.5297222 | 111694     | 0                                                           | 0                   | 1             | 3              | 4           |
| clearwater       | us      | Florida Peninsula                                | 30                | -82.8002778 | 27.9655556 | 108064     | 0                                                           | 1                   | 1             | 7              | 9           |
| clermont-ferrand | fr      | Cantabric Coast - Languedoc                      | 10                | 3.0862810   | 45.7796570 | 137364     | 0                                                           | 0                   | 0             | 1              | 1           |

Table S2 Cities and freshwater reptiles

| City                 | Country | Freshwater Ecoregions of the World (FEOW) Region | Regional richness | Longitude    | Latitude    | Population | # of freshwater reptile species within 50 km of city centre |                     |               |                |             |
|----------------------|---------|--------------------------------------------------|-------------------|--------------|-------------|------------|-------------------------------------------------------------|---------------------|---------------|----------------|-------------|
|                      |         |                                                  |                   |              |             |            | Lizard species                                              | Crocodilian species | Snake species | Turtle species | All species |
| cleveland            | us      | Laurentian Great Lakes                           | 16                | -81.6955556  | 41.4994444  | 449514     | 0                                                           | 0                   | 0             | 8              | 8           |
| cluj-napoca          | ro      | Dniester - Lower Danube                          | 3                 | 23.6000000   | 46.7666670  | 316749     | 0                                                           | 0                   | 0             | 0              | 0           |
| coacalco             | mx      | Lerma - Chapala                                  | 10                | -99.1102780  | 19.6316670  | 313419     | 0                                                           | 0                   | 0             | 5              | 5           |
| coatzacoalcos        | mx      | Coatzacoalcos                                    | 6                 | -94.4166670  | 18.1500000  | 230727     | 1                                                           | 1                   | 0             | 0              | 2           |
| cochabamba           | bo      | Amazonas High Andes                              | 1                 | -66.1500000  | -17.3833333 | 900440     | 0                                                           | 0                   | 0             | 0              | 0           |
| coimbra              | pt      | Western Iberia                                   | 6                 | -8.4195510   | 40.2056420  | 106580     | 0                                                           | 0                   | 0             | 1              | 1           |
| colatina             | br      | Northeastern Mata Atlantica                      | 1                 | -40.6166670  | -19.5333330 | 101193     | 0                                                           | 0                   | 0             | 0              | 0           |
| colchester           | gb      | Central & Western Europe                         | 13                | 0.9000000    | 51.8833330  | 109415     | 0                                                           | 0                   | 0             | 1              | 1           |
| colima               | mx      | Ameca - Manantlan                                | 11                | -103.7166670 | 19.2333330  | 127239     | 1                                                           | 0                   | 0             | 0              | 1           |
| cologne              | de      | Central & Western Europe                         | 13                | 6.9500000    | 50.9333330  | 968823     | 0                                                           | 0                   | 0             | 5              | 5           |
| colombo              | br      | Iguassu                                          | 2                 | -49.2333330  | -25.2833330 | 217002     | 1                                                           | 0                   | 0             | 1              | 2           |
| colombo              | lk      | Sri Lanka Wet Zone                               | 3                 | 79.8477778   | 6.9319444   | 648119     | 1                                                           | 0                   | 0             | 1              | 2           |
| colorado springs     | us      | US Southern Plains                               | 20                | -104.8208333 | 38.8338889  | 373072     | 0                                                           | 0                   | 0             | 4              | 4           |
| columbia             | us      | Appalachian Piedmont                             | 26                | -81.0350000  | 34.0005556  | 117722     | 0                                                           | 1                   | 1             | 8              | 10          |
| columbus             | us      | Apalachicola                                     | 22                | -84.9877778  | 32.4608333  | 185208     | 0                                                           | 0                   | 0             | 7              | 7           |
| columbus             | us      | Teays - Old Ohio                                 | 17                | -82.9988889  | 39.9611111  | 736836     | 0                                                           | 0                   | 0             | 7              | 7           |
| comodoro rivadavia   | ar      | Patagonia                                        | 0                 | -67.4965580  | -45.8641350 | 142597     | 0                                                           | 0                   | 0             | 0              | 0           |
| conakry              | gn      | Northern Upper Guinea                            | 3                 | -13.7122222  | 9.5091667   | 1871185    | 0                                                           | 0                   | 0             | 0              | 0           |
| concepcion           | cl      | South Andean Pacific Slopes                      | 0                 | -73.0500000  | -36.8333330 | 215414     | 0                                                           | 0                   | 0             | 0              | 0           |
| concord              | us      | Sacramento - San Joaquin                         | 10                | -122.0300000 | 37.9780556  | 125626     | 0                                                           | 0                   | 0             | 6              | 6           |
| concordia            | ar      | Lower Uruguay                                    | 3                 | -58.0208900  | -31.3929590 | 155686     | 0                                                           | 0                   | 0             | 0              | 0           |
| conselheiro lafaiete | br      | S. Francisco                                     | 0                 | -43.8000000  | -20.6666670 | 111598     | 0                                                           | 0                   | 0             | 0              | 0           |
| constantia           | ro      | Dniester - Lower Danube                          | 3                 | 28.6500000   | 44.1833330  | 303401     | 0                                                           | 0                   | 0             | 1              | 1           |
| constantine          | dz      | Mediterranean Northwest Africa                   | 2                 | 6.6147222    | 36.3650000  | 450126     | 0                                                           | 0                   | 0             | 0              | 0           |

Table S2 Cities and freshwater reptiles

| City               | Country | Freshwater Ecoregions of the World (FEOW) Region | Regional richness | Longitude    | Latitude    | Population | # of freshwater reptile species within 50 km of city centre |                     |               |                |             |
|--------------------|---------|--------------------------------------------------|-------------------|--------------|-------------|------------|-------------------------------------------------------------|---------------------|---------------|----------------|-------------|
|                    |         |                                                  |                   |              |             |            | Lizard species                                              | Crocodilian species | Snake species | Turtle species | All species |
| contagem           | br      | S. Francisco                                     | 0                 | -44.1000000  | -19.9166670 | 627132     | 0                                                           | 0                   | 0             | 0              | 0           |
| copenhagen         | dk      | Northern Baltic Drainages                        | 2                 | 12.5833330   | 55.6666670  | 1089958    | 0                                                           | 0                   | 0             | 2              | 2           |
| copiapo            | cl      | Atacama                                          | 0                 | -70.3333330  | -27.3666670 | 129281     | 0                                                           | 0                   | 0             | 0              | 0           |
| coquimbo           | cl      | South Andean Pacific Slopes                      | 0                 | -71.3436110  | -29.9533330 | 161319     | 0                                                           | 0                   | 0             | 0              | 0           |
| coral springs      | us      | Florida Peninsula                                | 30                | -80.2708333  | 26.2708333  | 131674     | 1                                                           | 1                   | 1             | 8              | 11          |
| cordoba            | ar      | Mar Chiquita - Salinas Grandes                   | 1                 | -64.1810520  | -31.4134960 | 1441007    | 1                                                           | 1                   | 0             | 1              | 3           |
| cordoba            | mx      | Papaloapan                                       | 13                | -96.9333330  | 18.8833330  | 134409     | 1                                                           | 1                   | 0             | 1              | 3           |
| cordoba            | es      | Southern Iberia                                  | 8                 | -4.7727480   | 37.8915500  | 311186     | 1                                                           | 1                   | 0             | 1              | 3           |
| cork               | ie      | Northern British Isles                           | 1                 | -8.4958333   | 51.8986111  | 188908     | 0                                                           | 0                   | 0             | 0              | 0           |
| corlu              | tr      | Thrace                                           | 3                 | 27.8000000   | 41.1591670  | 202659     | 0                                                           | 0                   | 0             | 0              | 0           |
| coro               | ve      | South America Caribbean Drainages - Trinidad     | 6                 | -69.6672222  | 11.4091667  | 195246     | 0                                                           | 0                   | 0             | 0              | 0           |
| corona             | us      | Southern California Coastal - Baja California    | 12                | -117.5655556 | 33.8752778  | 152954     | 0                                                           | 0                   | 0             | 6              | 6           |
| coronel fabriciano | br      | Northeastern Mata Atlantica                      | 1                 | -42.6333330  | -19.5166670 | 100918     | 0                                                           | 0                   | 0             | 0              | 0           |
| corpus christi     | us      | West Texas Gulf                                  | 16                | -97.3961111  | 27.8002778  | 280382     | 0                                                           | 1                   | 1             | 6              | 8           |
| corrientes         | ar      | Lower Parana                                     | 9                 | -58.8340990  | -27.4805960 | 390481     | 0                                                           | 0                   | 0             | 0              | 0           |
| corum              | tr      | Northern Anatolia                                | 2                 | 34.9533330   | 40.5488890  | 183513     | 0                                                           | 0                   | 0             | 0              | 0           |
| costa mesa         | us      | Southern California Coastal - Baja California    | 12                | -117.9177778 | 33.6411111  | 109250     | 0                                                           | 0                   | 0             | 7              | 7           |
| cotabato           | ph      | Mindanao                                         | 1                 | 124.2463890  | 7.2236110   | 179445     | 0                                                           | 0                   | 0             | 0              | 0           |
| cotia              | br      | Upper Parana                                     | 3                 | -46.9333330  | -23.6166670 | 174832     | 0                                                           | 0                   | 0             | 1              | 1           |
| cotonou            | bj      | Bight Drainages                                  | 7                 | 2.4333333    | 6.3500000   | 690584     | 1                                                           | 1                   | 2             | 1              | 5           |
| cottbus            | de      | Central & Western Europe                         | 13                | 14.3333330   | 51.7666670  | 115246     | 0                                                           | 0                   | 0             | 1              | 1           |
| coventry           | gb      | Central & Western Europe                         | 13                | -1.5500000   | 52.4166670  | 308314     | 0                                                           | 0                   | 0             | 1              | 1           |
| cracow             | pl      | Central & Western Europe                         | 13                | 19.9166670   | 50.0833330  | 755050     | 0                                                           | 0                   | 0             | 1              | 1           |
| craiova            | ro      | Dniester - Lower Danube                          | 3                 | 23.8000000   | 44.3166670  | 304144     | 0                                                           | 0                   | 0             | 0              | 0           |

Table S2 Cities and freshwater reptiles

| City               | Country | Freshwater Ecoregions of the World (FEOW) Region | Regional richness | Longitude    | Latitude    | Population | # of freshwater reptile species within 50 km of city centre |                     |               |                |             |
|--------------------|---------|--------------------------------------------------|-------------------|--------------|-------------|------------|-------------------------------------------------------------|---------------------|---------------|----------------|-------------|
|                    |         |                                                  |                   |              |             |            | Lizard species                                              | Crocodilian species | Snake species | Turtle species | All species |
| crawley            | gb      | Central & Western Europe                         | 13                | -0.1833330   | 51.1166670  | 107061     | 0                                                           | 0                   | 0             | 2              | 2           |
| criciuma           | br      | Tramandai - Mampituba                            | 0                 | -49.3833330  | -28.6666670 | 161957     | 0                                                           | 0                   | 0             | 0              | 0           |
| cua                | ve      | South America Caribbean Drainages - Trinidad     | 6                 | -66.8852778  | 10.1622222  | 182925     | 0                                                           | 0                   | 0             | 0              | 0           |
| cuautitlan izcalli | mx      | Lerma - Chapala                                  | 10                | -99.2466670  | 19.6469440  | 475199     | 0                                                           | 0                   | 0             | 5              | 5           |
| cuautla            | mx      | Rio Balsas                                       | 10                | -98.9500000  | 18.8000000  | 146186     | 0                                                           | 0                   | 0             | 4              | 4           |
| cubatao            | br      | Ribeira de Iguape                                | 1                 | -46.4166670  | -23.8833330 | 118412     | 0                                                           | 0                   | 0             | 1              | 1           |
| cucuta             | co      | Maracaibo                                        | 0                 | -72.5078210  | 7.8939070   | 721406     | 0                                                           | 0                   | 0             | 0              | 0           |
| cuddapah           | in      | Southern Deccan Plateau                          | 0                 | 78.8166670   | 14.4666670  | 127024     | 0                                                           | 0                   | 0             | 0              | 0           |
| cuenca             | ec      | Amazonas High Andes                              | 1                 | -78.9833333  | -2.8833333  | 276964     | 0                                                           | 0                   | 0             | 0              | 0           |
| cuernavaca         | mx      | Rio Balsas                                       | 10                | -99.2500000  | 18.9166670  | 343785     | 0                                                           | 0                   | 0             | 5              | 5           |
| cuiaba             | br      | Paraguay                                         | 8                 | -56.0833330  | -15.5833330 | 521961     | 0                                                           | 0                   | 0             | 0              | 0           |
| culiacan           | mx      | Sinaloa                                          | 11                | -107.3897220 | 24.7994440  | 582489     | 0                                                           | 1                   | 0             | 2              | 3           |
| cumana             | ve      | South America Caribbean Drainages - Trinidad     | 6                 | -64.1666667  | 10.4666667  | 257821     | 0                                                           | 0                   | 0             | 0              | 0           |
| curico             | cl      | South Andean Pacific Slopes                      | 0                 | -71.2333330  | -34.9833330 | 102439     | 0                                                           | 0                   | 0             | 0              | 0           |
| curitiba           | br      | Iguassu                                          | 2                 | -49.2500000  | -25.4166670 | 1718433    | 0                                                           | 0                   | 0             | 0              | 0           |
| curug              | id      | Southern Sumatra - Western Java                  | 8                 | 106.6172220  | -6.2533330  | 191617     | 1                                                           | 2                   | 2             | 0              | 5           |
| curug              | id      | Southern Sumatra - Western Java                  | 8                 | 106.2256000  | -6.3367000  | 191617     | 1                                                           | 2                   | 2             | 0              | 5           |
| cusco              | pe      | Amazonas High Andes                              | 1                 | -71.9780556  | -13.5183333 | 313210     | 0                                                           | 0                   | 0             | 0              | 0           |
| czestochowa        | pl      | Central & Western Europe                         | 13                | 19.1240880   | 50.7964550  | 248125     | 0                                                           | 0                   | 0             | 1              | 1           |
| da lat             | vn      | Mekong Delta                                     | 3                 | 108.4166670  | 11.9333330  | 131382     | 0                                                           | 0                   | 0             | 0              | 0           |
| da nang            | vn      | Southern Annam                                   | 2                 | 108.2208330  | 16.0677780  | 472255     | 0                                                           | 0                   | 0             | 0              | 0           |
| daan               | cn      | Middle Yangtze                                   | 1                 | 106.0150000  | 29.3822220  | 120340     | 0                                                           | 0                   | 0             | 0              | 0           |
| dabrowa gornicza   | pl      | Central & Western Europe                         | 13                | 19.2243810   | 50.3262060  | 130601     | 0                                                           | 0                   | 0             | 1              | 1           |
| dadiangas          | ph      | Mindanao                                         | 1                 | 125.1716670  | 6.1127780   | 432571     | 0                                                           | 0                   | 0             | 0              | 0           |

Table S2 Cities and freshwater reptiles

| City          | Country | Freshwater Ecoregions of the World (FEOW) Region | Regional richness | Longitude   | Latitude   | Population | # of freshwater reptile species within 50 km of city centre |                     |               |                |             |
|---------------|---------|--------------------------------------------------|-------------------|-------------|------------|------------|-------------------------------------------------------------|---------------------|---------------|----------------|-------------|
|               |         |                                                  |                   |             |            |            | Lizard species                                              | Crocodilian species | Snake species | Turtle species | All species |
| dadu          | pk      | Lower & Middle Indus                             | 2                 | 67.7763060  | 26.7328650 | 139836     | 0                                                           | 0                   | 0             | 0              | 0           |
| dagupan       | ph      | Northern Philippine Islands                      | 1                 | 120.5166670 | 16.1000000 | 135933     | 0                                                           | 0                   | 0             | 0              | 0           |
| dahuk         | iq      | Upper Tigris & Euphrates                         | 3                 | 42.9997222  | 36.8658333 | 129127     | 0                                                           | 0                   | 0             | 0              | 0           |
| daito         | jp      | Honshu - Shikoku - Kyushu                        | 5                 | 135.6166670 | 34.7000000 | 129523     | 0                                                           | 0                   | 0             | 2              | 2           |
| dakar         | sn      | Senegal - Gambia                                 | 4                 | -17.4380556 | 14.6708333 | 2702820    | 1                                                           | 0                   | 0             | 0              | 1           |
| dali          | cn      | Er Hai                                           | 0                 | 100.1833330 | 25.7000000 | 134040     | 0                                                           | 0                   | 0             | 0              | 0           |
| dalian        | cn      | Liao He                                          | 0                 | 121.6022220 | 38.9122220 | 2035307    | 0                                                           | 0                   | 0             | 0              | 0           |
| daliang       | cn      | Xi Yang                                          | 15                | 113.2470060 | 22.8504160 | 210411     | 0                                                           | 0                   | 0             | 0              | 0           |
| dallas        | us      | Sabine - Galveston                               | 29                | -96.8000000 | 32.7833333 | 1211704    | 0                                                           | 1                   | 1             | 14             | 16          |
| daloa         | ci      | Eburneo                                          | 0                 | -6.4502210  | 6.8773550  | 217876     | 0                                                           | 0                   | 0             | 0              | 0           |
| damascus      | sy      | Arabian Interior                                 | 1                 | 36.3000000  | 33.5000000 | 1576843    | 0                                                           | 0                   | 0             | 0              | 0           |
| damaturu      | ng      | Lake Chad                                        | 0                 | 11.9608000  | 11.7470000 | 255913     | 0                                                           | 0                   | 0             | 0              | 0           |
| damoh         | in      | Ganges Delta & Plain                             | 13                | 79.4500000  | 23.8333330 | 118789     | 0                                                           | 0                   | 0             | 0              | 0           |
| dandong       | cn      | Eastern Yellow Sea Drainages                     | 7                 | 124.3947220 | 40.1291670 | 631973     | 0                                                           | 0                   | 0             | 0              | 0           |
| danshui       | cn      | Xi Yang                                          | 15                | 114.4671580 | 22.7983960 | 126701     | 0                                                           | 0                   | 1             | 3              | 4           |
| dar es salaam | tz      | Coastal East Africa                              | 4                 | 39.2833333  | -6.8000000 | 2698651    | 1                                                           | 0                   | 0             | 0              | 1           |
| darbhanga     | in      | Ganges Delta & Plain                             | 13                | 85.9000000  | 26.1666670 | 287180     | 0                                                           | 0                   | 0             | 0              | 0           |
| darjiling     | in      | Middle Brahmaputra                               | 0                 | 88.2666670  | 27.0333330 | 123808     | 0                                                           | 0                   | 0             | 0              | 0           |
| darmstadt     | de      | Central & Western Europe                         | 13                | 8.6494440   | 49.8705560 | 139757     | 0                                                           | 0                   | 0             | 5              | 5           |
| daska         | pk      | Lower & Middle Indus                             | 2                 | 74.3497410  | 32.3242620 | 126961     | 0                                                           | 0                   | 0             | 0              | 0           |
| dasmarinas    | ph      | Northern Philippine Islands                      | 1                 | 120.9366670 | 14.3294440 | 441878     | 0                                                           | 0                   | 0             | 0              | 0           |
| dasoguz       | tm      | Aral Sea Drainages                               | 0                 | 59.9666667  | 41.8333333 | 199514     | 0                                                           | 0                   | 0             | 0              | 0           |
| datong        | cn      | Lower Huang He                                   | 0                 | 113.2913890 | 40.0936110 | 1052678    | 0                                                           | 0                   | 0             | 0              | 0           |
| daugavpils    | lv      | Southern Baltic Lowlands                         | 0                 | 26.5333333  | 55.8833333 | 111564     | 0                                                           | 0                   | 0             | 0              | 0           |
| davao         | ph      | Mindanao                                         | 1                 | 125.6127780 | 7.0730560  | 1212285    | 1                                                           | 0                   | 0             | 0              | 1           |

Table S2 Cities and freshwater reptiles

| City             | Country | Freshwater Ecoregions of the World (FEOW) Region | Regional richness | Longitude   | Latitude   | Population | # of freshwater reptile species within 50 km of city centre |                     |               |                |             |
|------------------|---------|--------------------------------------------------|-------------------|-------------|------------|------------|-------------------------------------------------------------|---------------------|---------------|----------------|-------------|
|                  |         |                                                  |                   |             |            |            | Lizard species                                              | Crocodilian species | Snake species | Turtle species | All species |
| dawei            | mm      | Lower & Middle Salween                           | 5                 | 98.2000000  | 14.0833333 | 136798     | 0                                                           | 0                   | 0             | 0              | 0           |
| dawukou          | cn      | Huang He Great Bend                              | 0                 | 106.3958330 | 39.0419440 | 131880     | 0                                                           | 0                   | 0             | 0              | 0           |
| daxian           | cn      | Middle Yangtze                                   | 1                 | 107.5009220 | 31.2159210 | 130749     | 0                                                           | 0                   | 0             | 0              | 0           |
| dayton           | us      | Teays - Old Ohio                                 | 17                | -84.1916667 | 39.7588889 | 159134     | 0                                                           | 0                   | 0             | 8              | 8           |
| debre zeyit      | et      | Northern Eastern Rift                            | 1                 | 38.9833330  | 8.7500000  | 104234     | 0                                                           | 0                   | 0             | 0              | 0           |
| debreceen        | hu      | Dniester - Lower Danube                          | 3                 | 21.6333330  | 47.5333330 | 204825     | 0                                                           | 0                   | 0             | 0              | 0           |
| dehra dun        | in      | Ganges Himalayan Foothills                       | 3                 | 78.0333330  | 30.3166670 | 522135     | 0                                                           | 0                   | 0             | 0              | 0           |
| dehri            | in      | Ganges Delta & Plain                             | 13                | 84.1833330  | 24.8666670 | 129952     | 0                                                           | 0                   | 0             | 0              | 0           |
| dehui            | cn      | Songhua Jiang                                    | 0                 | 125.7000000 | 44.5333330 | 108818     | 0                                                           | 0                   | 0             | 0              | 0           |
| dekernes         | eg      | Nile Delta                                       | 0                 | 31.5969444  | 31.0883333 | 137559     | 0                                                           | 0                   | 0             | 0              | 0           |
| delhi            | in      | Ganges Delta & Plain                             | 13                | 77.2166670  | 28.6666670 | 10928270   | 0                                                           | 0                   | 0             | 0              | 0           |
| delicias         | mx      | Rio Conchos                                      | 2                 | -           | 28.2000000 | 102974     | 0                                                           | 0                   | 0             | 0              | 0           |
| delmas           | ht      | Hispaniola                                       | 5                 | -72.3027778 | 18.5447222 | 377194     | 0                                                           | 0                   | 0             | 0              | 0           |
| denizli          | tr      | Western Anatolia                                 | 5                 | 29.0875000  | 37.7741670 | 313402     | 0                                                           | 0                   | 0             | 0              | 0           |
| denpasar         | id      | Lesser Sunda Islands                             | 3                 | 115.2166670 | -8.6500000 | 405959     | 2                                                           | 0                   | 1             | 0              | 3           |
| denton           | us      | Sabine - Galveston                               | 29                | -97.1327778 | 33.2147222 | 100975     | 0                                                           | 1                   | 1             | 14             | 16          |
| denver           | us      | Middle Missouri                                  | 12                | -           | 39.7391667 | 555981     | 0                                                           | 0                   | 0             | 5              | 5           |
| deoria           | in      | Ganges Delta & Plain                             | 13                | 83.7872220  | 26.5047220 | 113638     | 0                                                           | 0                   | 0             | 0              | 0           |
| depok            | id      | Indian Ocean Slope of Sumatra & Java             | 9                 | 110.2175000 | -7.6966670 | 104537     | 1                                                           | 1                   | 2             | 0              | 4           |
| depok            | id      | Southern Sumatra - Western Java                  | 8                 | 106.4988890 | -6.3433330 | 1198195    | 1                                                           | 1                   | 2             | 0              | 4           |
| dera ghazi khan  | pk      | Lower & Middle Indus                             | 2                 | 70.6347660  | 30.0561420 | 236162     | 0                                                           | 0                   | 0             | 0              | 0           |
| dera ismail khan | pk      | Lower & Middle Indus                             | 2                 | 70.9023980  | 31.8326910 | 101658     | 0                                                           | 0                   | 0             | 0              | 0           |
| derbent          | ru      | Western Caspian Drainages                        | 0                 | 48.2898740  | 42.0677950 | 105967     | 0                                                           | 0                   | 0             | 0              | 0           |
| derby            | gb      | Central & Western Europe                         | 13                | -1.5000000  | 52.9333330 | 235029     | 0                                                           | 0                   | 0             | 1              | 1           |

Table S2 Cities and freshwater reptiles

| City         | Country | Freshwater Ecoregions of the World (FEOW) Region | Regional richness | Longitude  | Latitude   | Population | # of freshwater reptile species within 50 km of city centre |                     |               |                |             |
|--------------|---------|--------------------------------------------------|-------------------|------------|------------|------------|-------------------------------------------------------------|---------------------|---------------|----------------|-------------|
|              |         |                                                  |                   |            |            |            | Lizard species                                              | Crocodilian species | Snake species | Turtle species | All species |
| des moines   | us      | Upper Mississippi                                | 20                | -93.608889 | 41.600556  | 193180     | 0                                                           | 0                   | 0             | 2              | 2           |
| dese         | et      | Northern Eastern Rift                            | 1                 | 39.633333  | 11.133333  | 136080     | 0                                                           | 0                   | 0             | 0              | 0           |
| detroit      | us      | Laurentian Great Lakes                           | 16                | -83.045833 | 42.331389  | 884941     | 0                                                           | 0                   | 0             | 7              | 7           |
| dewas        | in      | Ganges Delta & Plain                             | 13                | 76.066670  | 22.966670  | 261245     | 0                                                           | 0                   | 0             | 0              | 0           |
| deyang       | cn      | Middle Yangtze                                   | 1                 | 104.381981 | 31.130192  | 152194     | 0                                                           | 0                   | 0             | 0              | 0           |
| dezful       | ir      | Lower Tigris & Euphrates                         | 1                 | 48.402000  | 32.382500  | 212367     | 0                                                           | 0                   | 0             | 0              | 0           |
| dezhou       | cn      | Lower Huang He                                   | 0                 | 116.292500 | 37.448611  | 379555     | 0                                                           | 0                   | 0             | 0              | 0           |
| dhaka        | bd      | Ganges Delta & Plain                             | 13                | 90.408611  | 23.723056  | 6493177    | 0                                                           | 0                   | 0             | 0              | 0           |
| dhanbad      | in      | Ganges Delta & Plain                             | 13                | 86.450000  | 23.800000  | 219660     | 0                                                           | 0                   | 0             | 0              | 0           |
| dharan       | np      | Ganges Delta & Plain                             | 13                | 87.283333  | 26.816667  | 108605     | 0                                                           | 0                   | 0             | 1              | 1           |
| dharmavaram  | in      | Southern Deccan Plateau                          | 0                 | 77.716670  | 14.433333  | 114062     | 0                                                           | 0                   | 0             | 0              | 0           |
| dhaulpur     | in      | Ganges Delta & Plain                             | 13                | 77.900000  | 26.700000  | 102469     | 0                                                           | 1                   | 0             | 0              | 1           |
| dhule        | in      | Namuda - Tapi                                    | 1                 | 74.783333  | 20.900000  | 367010     | 0                                                           | 0                   | 0             | 0              | 0           |
| diadema      | br      | Upper Parana                                     | 3                 | -46.616670 | -23.700000 | 390641     | 0                                                           | 0                   | 0             | 1              | 1           |
| dibrugarh    | in      | Ganges Delta & Plain                             | 13                | 94.902778  | 27.481667  | 122160     | 0                                                           | 0                   | 0             | 0              | 0           |
| didao        | cn      | Lower Amur                                       | 0                 | 130.800000 | 45.366670  | 109561     | 0                                                           | 0                   | 0             | 0              | 0           |
| digos        | ph      | Mindanao                                         | 1                 | 125.357222 | 6.749722   | 117536     | 1                                                           | 0                   | 0             | 0              | 1           |
| dijon        | fr      | Central & Western Europe                         | 13                | 5.016670   | 47.316670  | 153692     | 0                                                           | 0                   | 0             | 0              | 0           |
| dimapur      | in      | Middle Brahmaputra                               | 0                 | 93.733333  | 25.900000  | 135866     | 0                                                           | 0                   | 0             | 0              | 0           |
| dimitrovgrad | ru      | Volga - Ural                                     | 0                 | 49.550000  | 54.250000  | 132228     | 0                                                           | 0                   | 0             | 0              | 0           |
| dinajpur     | bd      | Ganges Delta & Plain                             | 13                | 88.633333  | 25.633333  | 206251     | 0                                                           | 0                   | 0             | 0              | 0           |
| dindigul     | in      | Southeastern Ghats                               | 3                 | 77.950000  | 10.350000  | 200814     | 0                                                           | 0                   | 0             | 0              | 0           |
| dingzhou     | cn      | Lower Huang He                                   | 0                 | 114.995556 | 38.513056  | 152934     | 0                                                           | 0                   | 0             | 0              | 0           |
| diourbel     | sn      | Senegal - Gambia                                 | 4                 | -16.250000 | 14.666667  | 126400     | 0                                                           | 0                   | 0             | 0              | 0           |
| dire dawa    | et      | Northern Eastern Rift                            | 1                 | 41.866111  | 9.593056   | 252347     | 0                                                           | 0                   | 0             | 0              | 0           |

Table S2 Cities and freshwater reptiles

| City                  | Country | Freshwater Ecoregions of the World (FEOW) Region | Regional richness | Longitude    | Latitude    | Population | # of freshwater reptile species within 50 km of city centre |                     |               |                |             |
|-----------------------|---------|--------------------------------------------------|-------------------|--------------|-------------|------------|-------------------------------------------------------------|---------------------|---------------|----------------|-------------|
|                       |         |                                                  |                   |              |             |            | Lizard species                                              | Crocodilian species | Snake species | Turtle species | All species |
| divinopolis           | br      | S. Francisco                                     | 0                 | -44.9000000  | -20.1500000 | 193835     | 0                                                           | 0                   | 0             | 0              | 0           |
| divo                  | ci      | Eburneo                                          | 0                 | -5.3572290   | 5.8373900   | 184481     | 0                                                           | 0                   | 0             | 0              | 0           |
| djougou               | bj      | Bight Drainages                                  | 7                 | 1.6669444    | 9.7050000   | 202834     | 1                                                           | 0                   | 3             | 0              | 4           |
| do rud                | ir      | Upper Tigris & Euphrates                         | 3                 | 49.0571000   | 33.5000000  | 114404     | 0                                                           | 0                   | 0             | 0              | 0           |
| dodoma                | tz      | Coastal East Africa                              | 4                 | 35.7500000   | -6.1833333  | 180551     | 0                                                           | 0                   | 0             | 0              | 0           |
| doha                  | qa      | Arabian Interior                                 | 1                 | 51.5333330   | 25.2866670  | 344939     | 0                                                           | 0                   | 0             | 0              | 0           |
| donghai               | cn      | Coastal Fujian - Zeijang                         | 1                 | 115.6420430  | 22.9459350  | 188602     | 0                                                           | 0                   | 0             | 0              | 0           |
| dongli                | cn      | Xi Yang                                          | 15                | 110.3497220  | 20.7913890  | 110107     | 0                                                           | 0                   | 0             | 0              | 0           |
| dongling              | cn      | Liao He                                          | 0                 | 123.5758330  | 41.8144440  | 171454     | 0                                                           | 0                   | 0             | 0              | 0           |
| dongtai               | cn      | Lower Yangtze                                    | 4                 | 120.3094720  | 32.8523110  | 110988     | 0                                                           | 0                   | 0             | 0              | 0           |
| dongying              | cn      | Lower Huang He                                   | 0                 | 118.4855560  | 37.4563890  | 306450     | 0                                                           | 0                   | 0             | 0              | 0           |
| dordrecht             | nl      | Central & Western Europe                         | 13                | 4.6981990    | 51.8006530  | 121595     | 0                                                           | 0                   | 0             | 2              | 2           |
| dortmund              | de      | Central & Western Europe                         | 13                | 7.4500000    | 51.5166670  | 594255     | 0                                                           | 0                   | 0             | 1              | 1           |
| dos hermanas          | es      | Southern Iberia                                  | 8                 | -5.9208840   | 37.2828670  | 104666     | 0                                                           | 0                   | 0             | 4              | 4           |
| dos quebradas         | co      | Magdalena - Sinu                                 | 15                | -75.6672650  | 4.8391640   | 179586     | 0                                                           | 0                   | 0             | 1              | 1           |
| douala                | cm      | Northern Gulf of Guinea Drainages - Bioko        | 1                 | 9.7000000    | 4.0502778   | 1338144    | 0                                                           | 0                   | 0             | 0              | 0           |
| dourados              | br      | Upper Parana                                     | 3                 | -54.8000000  | -22.2166670 | 162206     | 0                                                           | 0                   | 0             | 0              | 0           |
| downey                | us      | Southern California Coastal - Baja California    | 12                | -118.1316667 | 33.9400000  | 111862     | 0                                                           | 0                   | 0             | 8              | 8           |
| dresden               | de      | Central & Western Europe                         | 13                | 13.7500000   | 51.0500000  | 480801     | 0                                                           | 0                   | 0             | 0              | 0           |
| drobeta-turnu severin | ro      | Dniester - Lower Danube                          | 3                 | 22.6561110   | 44.6319440  | 102347     | 0                                                           | 0                   | 0             | 0              | 0           |
| dubai                 | ae      | Oman Mountains                                   | 0                 | 55.3047170   | 25.2581720  | 1137376    | 0                                                           | 0                   | 0             | 0              | 0           |
| dublin                | ie      | Northern British Isles                           | 1                 | -6.2488889   | 53.3330556  | 1024027    | 0                                                           | 0                   | 0             | 1              | 1           |
| dudley                | gb      | Central & Western Europe                         | 13                | -2.0833330   | 52.5000000  | 199060     | 0                                                           | 0                   | 0             | 1              | 1           |
| duisburg              | de      | Central & Western Europe                         | 13                | 6.7500000    | 51.4333330  | 505271     | 0                                                           | 0                   | 0             | 3              | 3           |

Table S2 Cities and freshwater reptiles

| City             | Country | Freshwater Ecoregions of the World (FEOW) Region | Regional richness | Longitude    | Latitude    | Population | # of freshwater reptile species within 50 km of city centre |                     |               |                |             |
|------------------|---------|--------------------------------------------------|-------------------|--------------|-------------|------------|-------------------------------------------------------------|---------------------|---------------|----------------|-------------|
|                  |         |                                                  |                   |              |             |            | Lizard species                                              | Crocodilian species | Snake species | Turtle species | All species |
| dum dum          | in      | Ganges Delta & Plain                             | 13                | 88.4169440   | 22.6222220  | 122731     | 1                                                           | 0                   | 0             | 0              | 1           |
| duma             | sy      | Arabian Interior                                 | 1                 | 36.4000000   | 33.5833333  | 111709     | 0                                                           | 0                   | 0             | 0              | 0           |
| dumaguete        | ph      | Northern Philippine Islands                      | 1                 | 123.3074000  | 9.3070000   | 113588     | 0                                                           | 0                   | 0             | 0              | 0           |
| dumai            | id      | Southern Central Sumatra                         | 3                 | 101.4500000  | 1.6833330   | 143775     | 0                                                           | 0                   | 0             | 0              | 0           |
| dundee           | gb      | Northern British Isles                           | 1                 | -2.9666670   | 56.5000000  | 151593     | 0                                                           | 0                   | 0             | 0              | 0           |
| dunedin          | nz      | New Zealand                                      | 2                 | 170.5000000  | -45.8666670 | 114346     | 0                                                           | 0                   | 0             | 0              | 0           |
| dunhua           | cn      | Songhua Jiang                                    | 0                 | 128.2425000  | 43.3725000  | 148844     | 0                                                           | 0                   | 0             | 0              | 0           |
| duque de caxias  | br      | Fluminense                                       | 1                 | -43.3250090  | -22.7903210 | 818339     | 0                                                           | 0                   | 0             | 0              | 0           |
| durango          | mx      | Rio Santiago                                     | 13                | -104.6666670 | 24.0333330  | 457154     | 0                                                           | 0                   | 0             | 1              | 1           |
| durban           | za      | Zambezian Lowveld                                | 10                | 31.0291980   | -29.8578960 | 3120340    | 0                                                           | 0                   | 1             | 2              | 3           |
| durg             | in      | Northern Deccan Plateau                          | 2                 | 81.2833330   | 21.1833330  | 255310     | 0                                                           | 0                   | 0             | 0              | 0           |
| durgapur         | in      | Ganges Delta & Plain                             | 13                | 87.3166670   | 23.4833330  | 518922     | 0                                                           | 0                   | 0             | 0              | 0           |
| durham           | us      | Appalachian Piedmont                             | 26                | -78.8988889  | 35.9938889  | 204734     | 0                                                           | 0                   | 0             | 8              | 8           |
| durres           | al      | Southeast Adriatic Drainages                     | 2                 | 19.4413889   | 41.3230556  | 122034     | 0                                                           | 0                   | 0             | 0              | 0           |
| dushanbe         | tj      | Upper Amu Darya                                  | 0                 | 68.7738889   | 38.5600000  | 543105     | 0                                                           | 0                   | 0             | 0              | 0           |
| dusseldorf       | de      | Central & Western Europe                         | 13                | 6.7666670    | 51.2166670  | 577139     | 0                                                           | 0                   | 0             | 6              | 6           |
| dzerzhinsk       | ru      | Volga - Ural                                     | 0                 | 43.4553930   | 56.2414320  | 256540     | 0                                                           | 0                   | 0             | 0              | 0           |
| east london      | za      | Southern Temperate Highveld                      | 5                 | 27.9100490   | -33.0110510 | 421562     | 0                                                           | 0                   | 0             | 0              | 0           |
| east los angeles | us      | Southern California Coastal - Baja California    | 12                | -118.1711111 | 34.0238889  | 125157     | 0                                                           | 0                   | 0             | 8              | 8           |
| eastbourne       | gb      | Central & Western Europe                         | 13                | 0.2500000    | 50.8000000  | 112906     | 0                                                           | 0                   | 0             | 1              | 1           |
| ebetsu           | jp      | Sakhalin, Hokkaido, & Sikhote - Alin Coast       | 0                 | 141.5505560  | 43.1080560  | 133955     | 0                                                           | 0                   | 0             | 0              | 0           |
| ebina            | jp      | Honshu - Shikoku - Kyushu                        | 5                 | 139.3965150  | 35.3812120  | 123667     | 0                                                           | 0                   | 0             | 3              | 3           |
| ecatepec         | mx      | Lerma - Chapala                                  | 10                | -99.0525000  | 19.6011110  | 1806297    | 0                                                           | 0                   | 0             | 5              | 5           |
| ede              | ng      | Bight Drainages                                  | 7                 | 4.4333330    | 7.7333330   | 283728     | 0                                                           | 0                   | 0             | 0              | 0           |

Table S2 Cities and freshwater reptiles

| City                | Country | Freshwater Ecoregions of the World (FEOW) Region   | Regional richness | Longitude    | Latitude   | Population | # of freshwater reptile species within 50 km of city centre |                     |               |                |             |
|---------------------|---------|----------------------------------------------------|-------------------|--------------|------------|------------|-------------------------------------------------------------|---------------------|---------------|----------------|-------------|
|                     |         |                                                    |                   |              |            |            | Lizard species                                              | Crocodilian species | Snake species | Turtle species | All species |
| ede                 | nl      | Central & Western Europe                           | 13                | 5.6777430    | 52.0352530 | 106506     | 0                                                           | 0                   | 0             | 0              | 0           |
| edea                | cm      | Southern Gulf of Guinea Drainages                  | 4                 | 10.1333333   | 3.8000000  | 203170     | 0                                                           | 0                   | 0             | 0              | 0           |
| edinburgh           | gb      | Northern British Isles                             | 1                 | -3.2000000   | 55.9500000 | 435794     | 0                                                           | 0                   | 0             | 0              | 0           |
| edirne              | tr      | Thrace                                             | 3                 | 26.5586650   | 41.6757450 | 126535     | 0                                                           | 0                   | 0             | 0              | 0           |
| edison              | us      | Northeast US & Southeast Canada Atlantic Drainages | 18                | -74.4125000  | 40.5186111 | 102548     | 0                                                           | 0                   | 0             | 12             | 12          |
| edmonton            | ca      | Upper Saskatchewan                                 | 0                 | -113.5000000 | 53.5500000 | 822319     | 0                                                           | 0                   | 0             | 0              | 0           |
| eindhoven           | nl      | Central & Western Europe                           | 13                | 5.4666670    | 51.4500000 | 210498     | 0                                                           | 0                   | 0             | 1              | 1           |
| ejido               | ve      | Maracaibo                                          | 0                 | -71.2375000  | 8.5513889  | 107056     | 0                                                           | 0                   | 0             | 0              | 0           |
| ejigbo              | ng      | Bight Drainages                                    | 7                 | 4.3166670    | 7.9000000  | 138367     | 0                                                           | 0                   | 0             | 0              | 0           |
| ekibastuz           | kz      | Ob                                                 | 0                 | 75.3666670   | 51.6666670 | 144133     | 0                                                           | 0                   | 0             | 0              | 0           |
| el faiyum           | eg      | Lower Nile                                         | 1                 | 30.8400000   | 29.3077778 | 306421     | 0                                                           | 0                   | 0             | 0              | 0           |
| el limon            | ve      | Orinoco Piedmont                                   | 10                | -67.6325000  | 10.3091667 | 148270     | 0                                                           | 0                   | 0             | 1              | 1           |
| el mahalla el kubra | eg      | Nile Delta                                         | 0                 | 31.1669444   | 30.9761111 | 431088     | 0                                                           | 0                   | 0             | 0              | 0           |
| el monte            | us      | Southern California Coastal - Baja California      | 12                | -118.0266667 | 34.0686111 | 125372     | 0                                                           | 0                   | 0             | 8              | 8           |
| el paso             | us      | Upper Rio Grande - Bravo                           | 8                 | -106.4863889 | 31.7586111 | 597181     | 0                                                           | 0                   | 0             | 2              | 2           |
| el progreso         | hn      | Mosquitia                                          | 3                 | -87.8000000  | 15.4000000 | 100821     | 0                                                           | 0                   | 0             | 0              | 0           |
| el tigre            | ve      | Orinoco Delta & Coastal Drainages                  | 0                 | -64.2527778  | 8.8925000  | 151011     | 0                                                           | 0                   | 0             | 0              | 0           |
| elbasan             | al      | Southeast Adriatic Drainages                       | 2                 | 20.0822222   | 41.1125000 | 100903     | 0                                                           | 0                   | 0             | 0              | 0           |
| elblag              | pl      | Central & Western Europe                           | 13                | 19.4088410   | 54.1522000 | 127558     | 0                                                           | 0                   | 0             | 1              | 1           |
| eldoret             | ke      | Lake Victoria Basin                                | 5                 | 35.2833333   | 0.5166667  | 218472     | 0                                                           | 0                   | 0             | 0              | 0           |
| elektrostal         | ru      | Volga - Ural                                       | 0                 | 38.4467110   | 55.7895930 | 144389     | 0                                                           | 0                   | 0             | 0              | 0           |
| elista              | ru      | Western Caspian Drainages                          | 0                 | 44.2558330   | 46.3077780 | 106972     | 0                                                           | 0                   | 0             | 0              | 0           |
| elizabeth           | us      | Northeast US & Southeast Canada Atlantic Drainages | 18                | -74.2111111  | 40.6638889 | 123913     | 0                                                           | 0                   | 0             | 12             | 12          |

Table S2 Cities and freshwater reptiles

| City       | Country | Freshwater Ecoregions of the World (FEOW) Region | Regional richness | Longitude    | Latitude    | Population | # of freshwater reptile species within 50 km of city centre |                     |               |                |             |
|------------|---------|--------------------------------------------------|-------------------|--------------|-------------|------------|-------------------------------------------------------------|---------------------|---------------|----------------|-------------|
|            |         |                                                  |                   |              |             |            | Lizard species                                              | Crocodilian species | Snake species | Turtle species | All species |
| eluru      | in      | Southern Deccan Plateau                          | 0                 | 81.1000000   | 16.7000000  | 183401     | 0                                                           | 0                   | 0             | 0              | 0           |
| embu       | br      | Upper Parana                                     | 3                 | -46.8500000  | -23.6500000 | 221737     | 0                                                           | 0                   | 0             | 1              | 1           |
| emmen      | nl      | Central & Western Europe                         | 13                | 6.8947440    | 52.7924710  | 112333     | 0                                                           | 0                   | 0             | 1              | 1           |
| encheng    | cn      | Xi Yang                                          | 15                | 112.3025970  | 22.1838920  | 110921     | 0                                                           | 0                   | 0             | 0              | 0           |
| engels     | ru      | Volga - Ural                                     | 0                 | 46.1052780   | 51.4838890  | 196013     | 0                                                           | 0                   | 0             | 0              | 0           |
| enschede   | nl      | Central & Western Europe                         | 13                | 6.8912350    | 52.2195150  | 154183     | 0                                                           | 0                   | 0             | 1              | 1           |
| ensenada   | mx      | Southern California Coastal - Baja California    | 12                | -116.6166670 | 31.8666670  | 256577     | 0                                                           | 0                   | 0             | 1              | 1           |
| enugu      | ng      | Northern Gulf of Guinea Drainages - Bioko        | 1                 | 7.4943000    | 6.4402000   | 653436     | 0                                                           | 0                   | 0             | 0              | 0           |
| envigado   | co      | Magdalena - Sinu                                 | 15                | -75.5853070  | 6.1706430   | 163010     | 1                                                           | 0                   | 0             | 2              | 3           |
| erfurt     | de      | Central & Western Europe                         | 13                | 11.0333330   | 50.9833330  | 196719     | 0                                                           | 0                   | 0             | 1              | 1           |
| erlangen   | de      | Central & Western Europe                         | 13                | 11.0038890   | 49.5897220  | 102781     | 0                                                           | 0                   | 0             | 2              | 2           |
| erode      | in      | Southeastern Ghats                               | 3                 | 77.7333330   | 11.3500000  | 147283     | 0                                                           | 0                   | 0             | 0              | 0           |
| erzincan   | tr      | Upper Tigris & Euphrates                         | 3                 | 39.4927780   | 39.7522220  | 114087     | 0                                                           | 0                   | 0             | 0              | 0           |
| erzurum    | tr      | Upper Tigris & Euphrates                         | 3                 | 41.2769440   | 39.9086110  | 420919     | 0                                                           | 0                   | 0             | 0              | 0           |
| escondido  | us      | Southern California Coastal - Baja California    | 12                | -117.0855556 | 33.1191667  | 137119     | 0                                                           | 0                   | 0             | 5              | 5           |
| escuintla  | gt      | Chiapas - Fonseca                                | 11                | -90.7850000  | 14.3050000  | 101047     | 1                                                           | 0                   | 0             | 0              | 1           |
| esenyurt   | tr      | Thrace                                           | 3                 | 28.6752780   | 41.0333330  | 211443     | 0                                                           | 0                   | 0             | 0              | 0           |
| esfahan    | ir      | Esfahan                                          | 0                 | 51.6776080   | 32.6572180  | 1547241    | 0                                                           | 0                   | 0             | 0              | 0           |
| eskisehir  | tr      | Northern Anatolia                                | 2                 | 30.5205560   | 39.7766670  | 515155     | 0                                                           | 0                   | 0             | 0              | 0           |
| eslamshahr | ir      | Namak                                            | 3                 | 51.2346000   | 35.5605000  | 318855     | 0                                                           | 0                   | 0             | 3              | 3           |
| esmeraldas | br      | S. Francisco                                     | 0                 | -44.3166670  | -19.7500000 | 103252     | 0                                                           | 0                   | 0             | 0              | 0           |
| espoo      | fi      | Northern Baltic Drainages                        | 2                 | 24.6666670   | 60.2166670  | 229528     | 0                                                           | 0                   | 0             | 0              | 0           |
| essen      | de      | Central & Western Europe                         | 13                | 7.0166670    | 51.4500000  | 576914     | 0                                                           | 0                   | 0             | 2              | 2           |
| etah       | in      | Ganges Delta & Plain                             | 13                | 78.6666670   | 27.6333330  | 120020     | 0                                                           | 0                   | 0             | 0              | 0           |

Table S2 Cities and freshwater reptiles

| City                  | Country | Freshwater Ecoregions of the World (FEOW) Region | Regional richness | Longitude    | Latitude    | Population | # of freshwater reptile species within 50 km of city centre |                     |               |                |             |
|-----------------------|---------|--------------------------------------------------|-------------------|--------------|-------------|------------|-------------------------------------------------------------|---------------------|---------------|----------------|-------------|
|                       |         |                                                  |                   |              |             |            | Lizard species                                              | Crocodilian species | Snake species | Turtle species | All species |
| etawah                | in      | Ganges Delta & Plain                             | 13                | 79.0239000   | 26.7769000  | 257472     | 0                                                           | 2                   | 0             | 4              | 6           |
| eugene                | us      | Columbia Unglaciaded                             | 4                 | -123.0855556 | 44.0522222  | 145208     | 0                                                           | 0                   | 0             | 2              | 2           |
| evansville            | us      | Teays - Old Ohio                                 | 17                | -87.5558333  | 37.9747222  | 115474     | 0                                                           | 0                   | 0             | 4              | 4           |
| exeter                | gb      | Central & Western Europe                         | 13                | -3.5333330   | 50.7000000  | 113119     | 0                                                           | 0                   | 0             | 0              | 0           |
| ezhou                 | cn      | Lower Yangtze                                    | 4                 | 114.8865460  | 30.3960720  | 193652     | 0                                                           | 0                   | 0             | 0              | 0           |
| fairfield             | us      | Sacramento - San Joaquin                         | 10                | -122.0388889 | 38.2494444  | 105741     | 0                                                           | 0                   | 0             | 4              | 4           |
| faisalabad            | pk      | Lower & Middle Indus                             | 2                 | 73.0833330   | 31.4166670  | 2507302    | 0                                                           | 0                   | 0             | 0              | 0           |
| faizabad              | in      | Ganges Delta & Plain                             | 13                | 82.1333330   | 26.7833330  | 153062     | 0                                                           | 0                   | 0             | 0              | 0           |
| faridabad             | in      | Ganges Delta & Plain                             | 13                | 77.3166670   | 28.4333330  | 1280909    | 0                                                           | 0                   | 0             | 0              | 0           |
| faridpur              | bd      | Ganges Delta & Plain                             | 13                | 89.8333333   | 23.6000000  | 112200     | 0                                                           | 0                   | 0             | 0              | 0           |
| farrukhabad           | in      | Ganges Delta & Plain                             | 13                | 79.5666670   | 27.4000000  | 241176     | 0                                                           | 0                   | 0             | 0              | 0           |
| fatehpur              | in      | Ganges Delta & Plain                             | 13                | 80.8000000   | 25.9333330  | 166496     | 0                                                           | 0                   | 0             | 0              | 0           |
| fayetteville          | us      | Appalachian Piedmont                             | 26                | -78.8786111  | 35.0525000  | 124775     | 0                                                           | 0                   | 0             | 6              | 6           |
| feira de santana      | br      | Northeastern Mata Atlantica                      | 1                 | -38.9500000  | -12.2500000 | 481926     | 0                                                           | 0                   | 0             | 0              | 0           |
| fengcheng             | cn      | Eastern Yellow Sea Drainages                     | 7                 | 124.0716670  | 40.4536110  | 120514     | 0                                                           | 0                   | 0             | 0              | 0           |
| fengshan              | tw      | Western Taiwan                                   | 2                 | 120.3500000  | 22.6333333  | 334443     | 0                                                           | 0                   | 0             | 1              | 1           |
| fernando de la mora   | py      | Chaco                                            | 3                 | -57.6000000  | -25.3166670 | 120180     | 0                                                           | 1                   | 0             | 0              | 1           |
| ferrara               | it      | Gulf of Venice Drainages                         | 8                 | 11.5833330   | 44.8333330  | 131252     | 0                                                           | 0                   | 0             | 2              | 2           |
| ferraz de vasconcelos | br      | Upper Parana                                     | 3                 | -46.3666670  | -23.5333330 | 167904     | 0                                                           | 0                   | 0             | 1              | 1           |
| fez                   | ma      | Atlantic Northwest Africa                        | 3                 | -4.9997970   | 34.0371510  | 1160239    | 0                                                           | 0                   | 0             | 1              | 1           |
| fianarantsoa          | mg      | Western Madagascar                               | 2                 | 47.0833333   | -21.4333333 | 167240     | 0                                                           | 0                   | 0             | 0              | 0           |
| firozabad             | in      | Ganges Delta & Plain                             | 13                | 78.4166670   | 27.1500000  | 306439     | 0                                                           | 2                   | 0             | 4              | 6           |
| firozpur              | in      | Lower & Middle Indus                             | 2                 | 74.6000000   | 30.9166670  | 102138     | 0                                                           | 0                   | 0             | 0              | 0           |
| flint                 | us      | Laurentian Great Lakes                           | 16                | -83.6875000  | 43.0125000  | 117258     | 0                                                           | 0                   | 0             | 5              | 5           |

Table S2 Cities and freshwater reptiles

| City             | Country | Freshwater Ecoregions of the World (FEOW) Region | Regional richness | Longitude    | Latitude    | Population | # of freshwater reptile species within 50 km of city centre |                     |               |                |             |
|------------------|---------|--------------------------------------------------|-------------------|--------------|-------------|------------|-------------------------------------------------------------|---------------------|---------------|----------------|-------------|
|                  |         |                                                  |                   |              |             |            | Lizard species                                              | Crocodilian species | Snake species | Turtle species | All species |
| florence         | it      | Italian Peninsula & Islands                      | 6                 | 11.2500000   | 43.7666670  | 347194     | 0                                                           | 0                   | 0             | 1              | 1           |
| florencia        | co      | Western Amazon Piedmont                          | 4                 | -75.6062290  | 1.6143820   | 130339     | 0                                                           | 0                   | 1             | 0              | 1           |
| florianopolis    | br      | Southeastern Mata Atlantica                      | 2                 | -48.5666670  | -27.5833330 | 412731     | 0                                                           | 1                   | 0             | 0              | 1           |
| floridablanca    | co      | Magdalena - Sinu                                 | 15                | -73.0864400  | 7.0622220   | 252271     | 0                                                           | 0                   | 0             | 0              | 0           |
| focsani          | ro      | Dniester - Lower Danube                          | 3                 | 27.1833330   | 45.7000000  | 105114     | 0                                                           | 0                   | 0             | 1              | 1           |
| foggia           | it      | Italian Peninsula & Islands                      | 6                 | 15.5666670   | 41.4500000  | 143826     | 0                                                           | 0                   | 0             | 0              | 0           |
| fontana          | us      | Southern California Coastal - Baja California    | 12                | -117.4341667 | 34.0922222  | 169160     | 0                                                           | 0                   | 0             | 3              | 3           |
| forli            | it      | Gulf of Venice Drainages                         | 8                 | 12.0527780   | 44.2236110  | 111574     | 0                                                           | 0                   | 0             | 2              | 2           |
| formosa          | ar      | Chaco                                            | 3                 | -58.1781390  | -26.1775340 | 248756     | 0                                                           | 0                   | 0             | 0              | 0           |
| fort collins     | us      | Middle Missouri                                  | 12                | -105.0838889 | 40.5852778  | 129252     | 0                                                           | 0                   | 0             | 4              | 4           |
| fort lauderdale  | us      | Florida Peninsula                                | 30                | -80.1436111  | 26.1219444  | 170510     | 1                                                           | 2                   | 1             | 10             | 14          |
| fort wayne       | us      | Laurentian Great Lakes                           | 16                | -85.1288889  | 41.1305556  | 229715     | 0                                                           | 0                   | 0             | 1              | 1           |
| fort worth       | us      | Sabine - Galveston                               | 29                | -97.3205556  | 32.7252778  | 618119     | 0                                                           | 1                   | 1             | 14             | 16          |
| fortaleza        | br      | Northeastern Caatinga & Coastal Drainages        | 1                 | -41.4166670  | -3.3166670  | 2416920    | 0                                                           | 0                   | 0             | 0              | 0           |
| foshan           | cn      | Xi Yang                                          | 15                | 113.1314830  | 23.0267710  | 627348     | 0                                                           | 0                   | 0             | 0              | 0           |
| foz do iguacu    | br      | Upper Parana                                     | 3                 | -54.5833330  | -25.5500000 | 293526     | 0                                                           | 1                   | 0             | 1              | 2           |
| franca           | br      | Upper Parana                                     | 3                 | -47.4000000  | -20.5333330 | 305047     | 0                                                           | 0                   | 0             | 0              | 0           |
| francisco morato | br      | Upper Parana                                     | 3                 | -46.7464030  | -23.2795030 | 171793     | 0                                                           | 0                   | 0             | 1              | 1           |
| franco da rocha  | br      | Upper Parana                                     | 3                 | -46.7184750  | -23.3248210 | 108860     | 0                                                           | 0                   | 0             | 1              | 1           |
| frankfurt        | de      | Central & Western Europe                         | 13                | 8.6833330    | 50.1166670  | 648034     | 0                                                           | 0                   | 0             | 7              | 7           |
| freetown         | sl      | Northern Upper Guinea                            | 3                 | -13.2341667  | 8.4900000   | 1190761    | 0                                                           | 0                   | 0             | 0              | 0           |
| freiburg         | de      | Central & Western Europe                         | 13                | 7.8500000    | 48.0000000  | 213920     | 0                                                           | 0                   | 0             | 3              | 3           |
| fremont          | us      | Sacramento - San Joaquin                         | 10                | -121.9875000 | 37.5483333  | 202615     | 0                                                           | 0                   | 0             | 7              | 7           |
| fresnillo        | mx      | Llanos El Salado                                 | 6                 | -102.8833330 | 23.1666670  | 105492     | 0                                                           | 0                   | 0             | 0              | 0           |

Table S2 Cities and freshwater reptiles

| City        | Country | Freshwater Ecoregions of the World (FEOW) Region | Regional richness | Longitude    | Latitude    | Population | # of freshwater reptile species within 50 km of city centre |                     |               |                |             |
|-------------|---------|--------------------------------------------------|-------------------|--------------|-------------|------------|-------------------------------------------------------------|---------------------|---------------|----------------|-------------|
|             |         |                                                  |                   |              |             |            | Lizard species                                              | Crocodilian species | Snake species | Turtle species | All species |
| fresno      | us      | Sacramento - San Joaquin                         | 10                | -119.7713889 | 36.7477778  | 465183     | 0                                                           | 0                   | 0             | 2              | 2           |
| fuchu       | jp      | Honshu - Shikoku - Kyushu                        | 5                 | 139.4833330  | 35.6666670  | 240082     | 0                                                           | 0                   | 0             | 3              | 3           |
| fuenlabrada | es      | Western Iberia                                   | 6                 | -3.7941470   | 40.2841890  | 202088     | 0                                                           | 0                   | 0             | 3              | 3           |
| fuji        | jp      | Honshu - Shikoku - Kyushu                        | 5                 | 138.6500000  | 35.1500000  | 240017     | 0                                                           | 0                   | 0             | 1              | 1           |
| fujieda     | jp      | Honshu - Shikoku - Kyushu                        | 5                 | 138.2666670  | 34.8666670  | 132860     | 0                                                           | 0                   | 0             | 0              | 0           |
| fujimi      | jp      | Honshu - Shikoku - Kyushu                        | 5                 | 139.5553750  | 35.8737390  | 108462     | 0                                                           | 0                   | 0             | 3              | 3           |
| fujinomiya  | jp      | Honshu - Shikoku - Kyushu                        | 5                 | 138.6166670  | 35.2166670  | 121517     | 0                                                           | 0                   | 0             | 1              | 1           |
| fujisawa    | jp      | Honshu - Shikoku - Kyushu                        | 5                 | 139.4700000  | 35.3419440  | 394630     | 0                                                           | 0                   | 0             | 3              | 3           |
| fukaya      | jp      | Honshu - Shikoku - Kyushu                        | 5                 | 139.2833330  | 36.2000000  | 106597     | 0                                                           | 0                   | 0             | 0              | 0           |
| fukuyama    | jp      | Honshu - Shikoku - Kyushu                        | 5                 | 133.3666670  | 34.4833330  | 383302     | 0                                                           | 0                   | 0             | 1              | 1           |
| fuling      | cn      | Middle Yangtze                                   | 1                 | 107.3919440  | 29.7022220  | 166507     | 0                                                           | 0                   | 0             | 0              | 0           |
| fullerton   | us      | Southern California Coastal - Baja California    | 12                | -117.9244444 | 33.8702778  | 135353     | 0                                                           | 0                   | 0             | 7              | 7           |
| funabashi   | jp      | Honshu - Shikoku - Kyushu                        | 5                 | 139.9833330  | 35.6930560  | 560754     | 0                                                           | 0                   | 0             | 3              | 3           |
| funtua      | ng      | Lower Niger - Benue                              | 2                 | 7.3081300    | 11.5232520  | 136821     | 0                                                           | 0                   | 0             | 0              | 0           |
| furth       | de      | Central & Western Europe                         | 13                | 10.9666670   | 49.4666670  | 112959     | 0                                                           | 0                   | 0             | 2              | 2           |
| fushun      | cn      | Liao He                                          | 0                 | 123.8833330  | 41.7000000  | 1400646    | 0                                                           | 0                   | 0             | 0              | 0           |
| fuxin       | cn      | Liao He                                          | 0                 | 121.6588890  | 42.0155560  | 689050     | 0                                                           | 0                   | 0             | 0              | 0           |
| fuyang      | cn      | Lower Yangtze                                    | 4                 | 115.8166670  | 32.9000000  | 170023     | 0                                                           | 0                   | 0             | 0              | 0           |
| fuyu        | cn      | Songhua Jiang                                    | 0                 | 124.8166670  | 45.1833330  | 138704     | 0                                                           | 0                   | 0             | 0              | 0           |
| fuzhou      | cn      | Coastal Fujian - Zeijang                         | 1                 | 119.3061110  | 26.0613890  | 1179720    | 0                                                           | 0                   | 0             | 0              | 0           |
| gaborone    | bw      | Zambezian Lowveld                                | 10                | 25.9119444   | -24.6463889 | 208411     | 0                                                           | 0                   | 0             | 1              | 1           |
| gadag       | in      | Southern Deccan Plateau                          | 0                 | 75.6166670   | 15.4166670  | 162583     | 0                                                           | 0                   | 0             | 0              | 0           |
| gagnoa      | ci      | Eburneo                                          | 0                 | -5.9506010   | 6.1319340   | 125647     | 0                                                           | 0                   | 0             | 0              | 0           |
| gainesville | us      | Florida Peninsula                                | 30                | -82.3250000  | 29.6513889  | 125684     | 0                                                           | 1                   | 1             | 11             | 13          |
| galati      | ro      | Dniester - Lower Danube                          | 3                 | 28.0500000   | 45.4500000  | 294088     | 0                                                           | 0                   | 0             | 0              | 0           |

Table S2 Cities and freshwater reptiles

| City         | Country | Freshwater Ecoregions of the World (FEOW) Region | Regional richness | Longitude    | Latitude   | Population | # of freshwater reptile species within 50 km of city centre |                     |               |                |             |
|--------------|---------|--------------------------------------------------|-------------------|--------------|------------|------------|-------------------------------------------------------------|---------------------|---------------|----------------|-------------|
|              |         |                                                  |                   |              |            |            | Lizard species                                              | Crocodilian species | Snake species | Turtle species | All species |
| gandajika    | cd      | Kasai                                            | 1                 | 23.9500000   | -6.7500000 | 154414     | 0                                                           | 0                   | 0             | 0              | 0           |
| gandhidham   | in      | Lower & Middle Indus                             | 2                 | 70.1333330   | 23.0833330 | 136605     | 0                                                           | 0                   | 0             | 0              | 0           |
| gandhinagar  | in      | Namuda - Tapi                                    | 1                 | 72.6833330   | 23.2166670 | 231314     | 0                                                           | 0                   | 0             | 0              | 0           |
| ganganagar   | in      | Lower & Middle Indus                             | 2                 | 73.8833330   | 29.9166670 | 231855     | 0                                                           | 0                   | 0             | 0              | 0           |
| gangapur     | in      | Ganges Delta & Plain                             | 13                | 76.7166670   | 26.4833330 | 120123     | 0                                                           | 0                   | 0             | 0              | 0           |
| gangawati    | in      | Southern Deccan Plateau                          | 0                 | 76.5333330   | 15.4333330 | 106259     | 0                                                           | 0                   | 0             | 0              | 0           |
| ganzhou      | cn      | Lower Yangtze                                    | 4                 | 114.9333330  | 25.8500000 | 249071     | 0                                                           | 0                   | 0             | 0              | 0           |
| gaomi        | cn      | Lower Huang He                                   | 0                 | 119.7527780  | 36.3833330 | 150793     | 0                                                           | 0                   | 0             | 0              | 0           |
| gaozhou      | cn      | Xi Yang                                          | 15                | 110.8460740  | 21.9392430 | 166069     | 0                                                           | 0                   | 0             | 0              | 0           |
| garanhuns    | br      | Northeastern Caatinga & Coastal Drainages        | 1                 | -36.4833330  | -8.9000000 | 110087     | 0                                                           | 0                   | 0             | 0              | 0           |
| garden grove | us      | Southern California Coastal - Baja California    | 12                | -117.9405556 | 33.7738889 | 167232     | 0                                                           | 0                   | 0             | 7              | 7           |
| gardez       | af      | Helmand - Sistan                                 | 0                 | 69.2259220   | 33.5974390 | 103732     | 0                                                           | 0                   | 0             | 0              | 0           |
| garland      | us      | Sabine - Galveston                               | 29                | -96.6386111  | 32.9125000 | 217219     | 0                                                           | 1                   | 1             | 13             | 15          |
| garoua       | cm      | Lower Niger - Benue                              | 2                 | 13.4000000   | 9.3000000  | 436932     | 0                                                           | 0                   | 0             | 0              | 0           |
| garut        | id      | Southern Sumatra - Western Java                  | 8                 | 107.8878000  | -7.2024000 | 122421     | 1                                                           | 0                   | 0             | 1              | 2           |
| garza garcia | mx      | Rio San Juan (Mexico)                            | 8                 | -100.4000000 | 25.6666670 | 130652     | 0                                                           | 0                   | 0             | 3              | 3           |
| gashua       | ng      | Lake Chad                                        | 0                 | 11.0482000   | 12.8710000 | 125827     | 0                                                           | 0                   | 0             | 0              | 0           |
| gaya         | in      | Ganges Delta & Plain                             | 13                | 85.0000000   | 24.7833330 | 423737     | 0                                                           | 0                   | 0             | 0              | 0           |
| gaziantep    | tr      | Upper Tigris & Euphrates                         | 3                 | 37.3825000   | 37.0594440 | 1066561    | 0                                                           | 0                   | 0             | 0              | 0           |
| gazipur      | bd      | Ganges Delta & Plain                             | 13                | 90.6500000   | 23.8000000 | 132249     | 0                                                           | 0                   | 0             | 0              | 0           |
| gazni        | af      | Helmand - Sistan                                 | 0                 | 68.4225000   | 33.5508330 | 143049     | 0                                                           | 0                   | 0             | 0              | 0           |
| gboko        | ng      | Northern Gulf of Guinea Drainages - Bioko        | 1                 | 8.9951000    | 7.3179000  | 195710     | 0                                                           | 0                   | 0             | 0              | 0           |
| gbongan      | ng      | Bight Drainages                                  | 7                 | 4.3500000    | 7.4666670  | 139494     | 0                                                           | 0                   | 0             | 0              | 0           |
| gdansk       | pl      | Central & Western Europe                         | 13                | 18.6582910   | 54.3608500 | 461865     | 0                                                           | 0                   | 0             | 1              | 1           |

Table S2 Cities and freshwater reptiles

| City                  | Country | Freshwater Ecoregions of the World (FEOW) Region | Regional richness | Longitude    | Latitude    | Population | # of freshwater reptile species within 50 km of city centre |                     |               |                |             |
|-----------------------|---------|--------------------------------------------------|-------------------|--------------|-------------|------------|-------------------------------------------------------------|---------------------|---------------|----------------|-------------|
|                       |         |                                                  |                   |              |             |            | Lizard species                                              | Crocodilian species | Snake species | Turtle species | All species |
| gdynia                | pl      | Central & Western Europe                         | 13                | 18.5500000   | 54.5000000  | 253730     | 0                                                           | 0                   | 0             | 1              | 1           |
| gebze                 | tr      | Thrace                                           | 3                 | 29.4306840   | 40.8027580  | 281585     | 0                                                           | 0                   | 0             | 0              | 0           |
| geelong               | au      | Bass Strait Drainages                            | 8                 | 144.3580930  | -38.1534610 | 150438     | 1                                                           | 0                   | 1             | 1              | 3           |
| gejiu                 | cn      | Xi Yang                                          | 15                | 103.1635120  | 23.3060220  | 136135     | 0                                                           | 0                   | 0             | 0              | 0           |
| gelsenkirchen         | de      | Central & Western Europe                         | 13                | 7.0500000    | 51.5166670  | 271647     | 0                                                           | 0                   | 0             | 2              | 2           |
| gemena                | cd      | Sudanic Congo - Oubangi                          | 0                 | 19.7666670   | 3.2500000   | 117631     | 0                                                           | 0                   | 0             | 0              | 0           |
| general escobedo      | mx      | Rio San Juan (Mexico)                            | 8                 | -100.3333330 | 25.8166670  | 308284     | 0                                                           | 0                   | 0             | 3              | 3           |
| geneva                | ch      | Central & Western Europe                         | 13                | 6.1481130    | 46.1956020  | 181492     | 0                                                           | 0                   | 0             | 1              | 1           |
| genoa                 | it      | Italian Peninsula & Islands                      | 6                 | 8.9500000    | 44.4166670  | 585815     | 0                                                           | 0                   | 0             | 0              | 0           |
| gent                  | be      | Central & Western Europe                         | 13                | 3.7166670    | 51.0500000  | 231493     | 0                                                           | 0                   | 0             | 2              | 2           |
| george                | za      | Cape Fold                                        | 3                 | 22.4617270   | -33.9630000 | 174591     | 1                                                           | 0                   | 1             | 2              | 4           |
| georgetown            | gy      | Guianas                                          | 7                 | -58.1666667  | 6.8000000   | 235017     | 0                                                           | 2                   | 1             | 0              | 3           |
| gera                  | de      | Central & Western Europe                         | 13                | 12.0833330   | 50.8666670  | 104463     | 0                                                           | 0                   | 0             | 1              | 1           |
| getafe                | es      | Western Iberia                                   | 6                 | -3.7059600   | 40.3084230  | 167550     | 0                                                           | 0                   | 0             | 3              | 3           |
| ghaziabad             | in      | Ganges Delta & Plain                             | 13                | 77.4333330   | 28.6666670  | 1199306    | 0                                                           | 0                   | 0             | 0              | 0           |
| ghazipur              | in      | Ganges Delta & Plain                             | 13                | 83.5666670   | 25.5833330  | 103105     | 0                                                           | 0                   | 0             | 0              | 0           |
| gijon                 | es      | Cantabric Coast - Languedoc                      | 10                | -5.6615190   | 43.5357310  | 262573     | 0                                                           | 0                   | 0             | 1              | 1           |
| gilbert               | us      | Gila                                             | 10                | -111.7883333 | 33.3527778  | 170829     | 0                                                           | 0                   | 0             | 1              | 1           |
| gillingham            | gb      | Central & Western Europe                         | 13                | 0.5666670    | 51.4000000  | 101187     | 0                                                           | 0                   | 0             | 2              | 2           |
| girardot              | co      | Magdalena - Sinu                                 | 15                | -74.8046810  | 4.2986590   | 130292     | 1                                                           | 1                   | 0             | 3              | 5           |
| giron                 | co      | Magdalena - Sinu                                 | 15                | -73.1698090  | 7.0682050   | 108468     | 1                                                           | 0                   | 0             | 0              | 1           |
| giugliano in campania | it      | Italian Peninsula & Islands                      | 6                 | 14.2000000   | 40.9333330  | 107680     | 0                                                           | 0                   | 0             | 0              | 0           |
| gizeh                 | eg      | Nile Delta                                       | 0                 | 31.2122222   | 30.0086111  | 2443490    | 0                                                           | 0                   | 0             | 0              | 0           |
| glasgow               | gb      | Northern British Isles                           | 1                 | -4.2500000   | 55.8333330  | 610271     | 0                                                           | 0                   | 0             | 0              | 0           |

Table S2 Cities and freshwater reptiles

| City                | Country | Freshwater Ecoregions of the World (FEOW) Region | Regional richness | Longitude    | Latitude    | Population | # of freshwater reptile species within 50 km of city centre |                     |               |                |             |
|---------------------|---------|--------------------------------------------------|-------------------|--------------|-------------|------------|-------------------------------------------------------------|---------------------|---------------|----------------|-------------|
|                     |         |                                                  |                   |              |             |            | Lizard species                                              | Crocodilian species | Snake species | Turtle species | All species |
| glazov              | ru      | Volga - Ural                                     | 0                 | 52.6584190   | 58.1394110  | 100677     | 0                                                           | 0                   | 0             | 0              | 0           |
| glendale            | us      | Gila                                             | 10                | -112.1852778 | 33.5386111  | 240112     | 0                                                           | 0                   | 0             | 2              | 2           |
| glendale            | us      | Southern California Coastal - Baja California    | 12                | -118.2541667 | 34.1425000  | 203201     | 0                                                           | 0                   | 0             | 2              | 2           |
| gliwice             | pl      | Central & Western Europe                         | 13                | 18.6765830   | 50.2976120  | 198835     | 0                                                           | 0                   | 0             | 1              | 1           |
| gloucester          | gb      | Central & Western Europe                         | 13                | -2.1666670   | 51.8333330  | 128722     | 0                                                           | 0                   | 0             | 0              | 0           |
| godhra              | in      | Namuda - Tapi                                    | 1                 | 73.6333330   | 22.7500000  | 131921     | 0                                                           | 0                   | 0             | 0              | 0           |
| goiania             | br      | Upper Parana                                     | 3                 | -49.2666670  | -16.6666670 | 1171209    | 0                                                           | 0                   | 0             | 0              | 0           |
| gojra               | pk      | Lower & Middle Indus                             | 2                 | 72.6865560   | 31.1487440  | 139767     | 0                                                           | 0                   | 0             | 0              | 0           |
| gold coast          | au      | Eastern Coastal Australia                        | 19                | 153.4308780  | -28.0002900 | 501175     | 1                                                           | 0                   | 1             | 4              | 6           |
| goma                | cd      | Lake Tanganyika                                  | 3                 | 29.2227780   | -1.6791670  | 144151     | 0                                                           | 0                   | 0             | 0              | 0           |
| gombe               | ng      | Lower Niger - Benue                              | 2                 | 11.1672880   | 10.2896900  | 250278     | 0                                                           | 0                   | 0             | 0              | 0           |
| gomel               | by      | Dnieper - South Bug                              | 2                 | 30.9833333   | 52.4416667  | 481000     | 0                                                           | 0                   | 0             | 1              | 1           |
| gomez palacio       | mx      | Mayran - Viesca                                  | 4                 | -103.5000000 | 25.5666670  | 228585     | 0                                                           | 0                   | 0             | 1              | 1           |
| gonbad-e qabus      | ir      | Turan Plain                                      | 1                 | 55.1672080   | 37.2500420  | 131427     | 0                                                           | 0                   | 0             | 1              | 1           |
| gonda               | in      | Ganges Delta & Plain                             | 13                | 81.9333330   | 27.1333330  | 133596     | 0                                                           | 0                   | 0             | 0              | 0           |
| gondal              | in      | Lower & Middle Indus                             | 2                 | 70.8000000   | 21.9666670  | 101808     | 0                                                           | 0                   | 0             | 0              | 0           |
| gondar              | et      | Lake Tana                                        | 1                 | 37.4666670   | 12.6000000  | 153942     | 0                                                           | 0                   | 0             | 0              | 0           |
| gongzhuling         | cn      | Liao He                                          | 0                 | 124.8122220  | 43.5072220  | 140909     | 0                                                           | 0                   | 0             | 0              | 0           |
| gorakhpur           | in      | Ganges Delta & Plain                             | 13                | 83.3738890   | 26.7550000  | 674312     | 0                                                           | 0                   | 0             | 0              | 0           |
| gorgan              | ir      | Turan Plain                                      | 1                 | 54.4347490   | 36.8386590  | 244955     | 0                                                           | 0                   | 0             | 1              | 1           |
| gorontalo           | id      | Sulawesi                                         | 2                 | 123.0595000  | 0.5412000   | 144202     | 0                                                           | 0                   | 0             | 0              | 0           |
| gorzow wielkopolski | pl      | Central & Western Europe                         | 13                | 15.2287750   | 52.7367900  | 124430     | 0                                                           | 0                   | 0             | 1              | 1           |
| goteborg            | se      | Northern Baltic Drainages                        | 2                 | 11.9666670   | 57.7166670  | 515253     | 0                                                           | 0                   | 0             | 1              | 1           |
| gottingen           | de      | Central & Western Europe                         | 13                | 9.9333330    | 51.5333330  | 123570     | 0                                                           | 0                   | 0             | 2              | 2           |

Table S2 Cities and freshwater reptiles

| City                 | Country | Freshwater Ecoregions of the World (FEOW) Region | Regional richness | Longitude    | Latitude    | Population | # of freshwater reptile species within 50 km of city centre |                     |               |                |             |
|----------------------|---------|--------------------------------------------------|-------------------|--------------|-------------|------------|-------------------------------------------------------------|---------------------|---------------|----------------|-------------|
|                      |         |                                                  |                   |              |             |            | Lizard species                                              | Crocodilian species | Snake species | Turtle species | All species |
| governador valadares | br      | Northeastern Mata Atlantica                      | 1                 | -41.9333330  | -18.8500000 | 250882     | 0                                                           | 0                   | 0             | 0              | 0           |
| granada              | es      | Southern Iberia                                  | 8                 | -3.5992010   | 37.1783540  | 248942     | 0                                                           | 0                   | 0             | 2              | 2           |
| grand prairie        | us      | Sabine - Galveston                               | 29                | -96.9975000  | 32.7458333  | 141122     | 0                                                           | 1                   | 1             | 14             | 16          |
| grand rapids         | us      | Laurentian Great Lakes                           | 16                | -85.6680556  | 42.9633333  | 193852     | 0                                                           | 0                   | 0             | 5              | 5           |
| gravatai             | br      | Laguna dos Patos                                 | 2                 | -50.9933000  | -29.9426000 | 238782     | 0                                                           | 0                   | 0             | 0              | 0           |
| graz                 | at      | Upper Danube                                     | 5                 | 15.4500000   | 47.0666670  | 222326     | 0                                                           | 0                   | 0             | 0              | 0           |
| green bay            | us      | Laurentian Great Lakes                           | 16                | -88.0197222  | 44.5191667  | 101012     | 0                                                           | 0                   | 0             | 2              | 2           |
| greensboro           | us      | Appalachian Piedmont                             | 26                | -79.7922222  | 36.0725000  | 231769     | 0                                                           | 0                   | 0             | 7              | 7           |
| grenoble             | fr      | Central & Western Europe                         | 13                | 5.7223870    | 45.1715460  | 154853     | 0                                                           | 0                   | 0             | 1              | 1           |
| grogol               | id      | Central & Eastern Java                           | 4                 | 110.7469440  | -7.2963890  | 100624     | 0                                                           | 0                   | 1             | 0              | 1           |
| groningen            | nl      | Central & Western Europe                         | 13                | 6.5500000    | 53.2166670  | 179995     | 0                                                           | 0                   | 0             | 0              | 0           |
| guacara              | ve      | Orinoco Piedmont                                 | 10                | -67.8738889  | 10.2297222  | 151788     | 0                                                           | 0                   | 0             | 2              | 2           |
| guadalajara          | mx      | Rio Santiago                                     | 13                | -103.3333330 | 20.6666670  | 1640649    | 0                                                           | 0                   | 0             | 3              | 3           |
| guadalupe            | mx      | Rio San Juan (Mexico)                            | 8                 | -100.2500000 | 25.6833330  | 724949     | 0                                                           | 0                   | 0             | 4              | 4           |
| guaiba               | br      | Laguna dos Patos                                 | 2                 | -51.3166670  | -30.1111110 | 101026     | 0                                                           | 0                   | 0             | 0              | 0           |
| guanare              | ve      | Orinoco Llanos                                   | 15                | -69.7500000  | 9.0500000   | 112315     | 0                                                           | 0                   | 0             | 0              | 0           |
| guangshui            | cn      | Lower Yangtze                                    | 4                 | 113.8155560  | 31.6161110  | 154771     | 0                                                           | 0                   | 0             | 0              | 0           |
| guangyuan            | cn      | Middle Yangtze                                   | 1                 | 105.8229960  | 32.4420150  | 213365     | 0                                                           | 0                   | 0             | 0              | 0           |
| guangzhou            | cn      | Xi Yang                                          | 15                | 113.2500000  | 23.1166670  | 3152825    | 0                                                           | 0                   | 0             | 0              | 0           |
| guantanamo           | cu      | Cuba - Cayman Islands                            | 2                 | -75.2091667  | 20.1444444  | 272808     | 0                                                           | 0                   | 0             | 0              | 0           |
| guarapari            | br      | Northeastern Mata Atlantica                      | 1                 | -40.5000000  | -20.6666670 | 100927     | 0                                                           | 0                   | 0             | 0              | 0           |
| guarapuava           | br      | Iguassu                                          | 2                 | -51.4500000  | -25.3833330 | 150851     | 0                                                           | 0                   | 0             | 0              | 0           |
| guaratingueta        | br      | Paraiba do Sul                                   | 0                 | -45.1892300  | -22.8151560 | 105882     | 0                                                           | 0                   | 0             | 0              | 0           |
| guarenas             | ve      | South America Caribbean Drainages - Trinidad     | 6                 | -66.6166667  | 10.4666667  | 181657     | 0                                                           | 0                   | 0             | 0              | 0           |

Table S2 Cities and freshwater reptiles

| City           | Country | Freshwater Ecoregions of the World (FEOW) Region | Regional richness | Longitude    | Latitude    | Population | # of freshwater reptile species within 50 km of city centre |                     |               |                |             |
|----------------|---------|--------------------------------------------------|-------------------|--------------|-------------|------------|-------------------------------------------------------------|---------------------|---------------|----------------|-------------|
|                |         |                                                  |                   |              |             |            | Lizard species                                              | Crocodilian species | Snake species | Turtle species | All species |
| guaruja        | br      | Ribeira de Iguape                                | 1                 | -46.2666670  | -24.0000000 | 310430     | 0                                                           | 0                   | 0             | 0              | 0           |
| guarulhos      | br      | Upper Parana                                     | 3                 | -46.5261750  | -23.4506800 | 1169601    | 0                                                           | 0                   | 0             | 1              | 1           |
| guatemala      | gt      | Quintana Roo - Motagua                           | 16                | -90.5269440  | 14.6211110  | 973208     | 1                                                           | 0                   | 0             | 1              | 2           |
| guatemala city | gt      | Quintana Roo - Motagua                           | 16                | -90.5269440  | 14.6211110  | 973208     | 1                                                           | 0                   | 0             | 1              | 2           |
| guatire        | ve      | South America Caribbean Drainages - Trinidad     | 6                 | -66.5333333  | 10.4666667  | 192291     | 0                                                           | 0                   | 0             | 0              | 0           |
| guayaquil      | ec      | North Andean Pacific Slopes - Rio Atrato         | 14                | -79.9000000  | -2.1666667  | 1952029    | 0                                                           | 1                   | 0             | 1              | 2           |
| guaymas        | mx      | Sonora                                           | 9                 | -110.9000000 | 27.9333330  | 103454     | 0                                                           | 0                   | 0             | 0              | 0           |
| gudalur        | in      | Southeastern Ghats                               | 3                 | 79.7500000   | 11.7500000  | 160993     | 0                                                           | 0                   | 0             | 0              | 0           |
| gudivada       | in      | Southern Deccan Plateau                          | 0                 | 80.9833330   | 16.4500000  | 116174     | 0                                                           | 0                   | 0             | 0              | 0           |
| guelph         | ca      | Laurentian Great Lakes                           | 16                | -80.2500000  | 43.5500000  | 115763     | 0                                                           | 0                   | 0             | 5              | 5           |
| guilin         | cn      | Xi Yang                                          | 15                | 110.2863890  | 25.2819440  | 649352     | 0                                                           | 0                   | 0             | 0              | 0           |
| guiyang        | cn      | Middle Yangtze                                   | 1                 | 106.7166670  | 26.5833330  | 1171633    | 0                                                           | 0                   | 0             | 0              | 0           |
| gujranwala     | pk      | Lower & Middle Indus                             | 2                 | 74.1883090   | 32.1616670  | 1384869    | 0                                                           | 0                   | 0             | 0              | 0           |
| gujrat         | pk      | Lower & Middle Indus                             | 2                 | 74.0789690   | 32.5728420  | 301595     | 0                                                           | 0                   | 0             | 0              | 0           |
| gulbarga       | in      | Southern Deccan Plateau                          | 0                 | 76.8333330   | 17.3333330  | 483655     | 0                                                           | 0                   | 0             | 0              | 0           |
| gulu           | ug      | Lake Victoria Basin                              | 5                 | 32.3055556   | 2.7666667   | 146832     | 0                                                           | 0                   | 0             | 0              | 0           |
| guna           | in      | Ganges Delta & Plain                             | 13                | 77.3166670   | 24.6500000  | 153705     | 0                                                           | 0                   | 0             | 0              | 0           |
| guntakal       | in      | Southern Deccan Plateau                          | 0                 | 77.3833330   | 15.1666670  | 120978     | 0                                                           | 0                   | 0             | 0              | 0           |
| guntur         | in      | Southern Deccan Plateau                          | 0                 | 80.4500000   | 16.3000000  | 530636     | 0                                                           | 0                   | 0             | 0              | 0           |
| gurgaon        | in      | Ganges Delta & Plain                             | 13                | 77.0333330   | 28.4666670  | 197353     | 0                                                           | 0                   | 0             | 0              | 0           |
| gusau          | ng      | Lower Niger - Benue                              | 2                 | 6.6613480    | 12.1627840  | 226873     | 0                                                           | 0                   | 0             | 0              | 0           |
| guwahati       | in      | Ganges Delta & Plain                             | 13                | 91.7333330   | 26.1833330  | 899132     | 0                                                           | 0                   | 0             | 0              | 0           |
| gwaliar        | in      | Ganges Delta & Plain                             | 13                | 78.1791670   | 26.2236110  | 882551     | 0                                                           | 1                   | 0             | 0              | 1           |
| gweru          | zw      | Zambeian Highveld                                | 3                 | 29.8166667   | -19.4500000 | 201879     | 0                                                           | 0                   | 0             | 0              | 0           |

Table S2 Cities and freshwater reptiles

| City           | Country | Freshwater Ecoregions of the World (FEOW) Region | Regional richness | Longitude   | Latitude   | Population | # of freshwater reptile species within 50 km of city centre |                     |               |                |             |
|----------------|---------|--------------------------------------------------|-------------------|-------------|------------|------------|-------------------------------------------------------------|---------------------|---------------|----------------|-------------|
|                |         |                                                  |                   |             |            |            | Lizard species                                              | Crocodilian species | Snake species | Turtle species | All species |
| gyor           | hu      | Upper Danube                                     | 5                 | 17.6376160  | 47.6872810 | 129009     | 0                                                           | 0                   | 0             | 0              | 0           |
| gyumri         | am      | Kura - South Caspian Drainages                   | 4                 | 43.8475000  | 40.7894444 | 148383     | 0                                                           | 0                   | 0             | 0              | 0           |
| ha noi         | vn      | Song Hong                                        | 1                 | 105.8500000 | 21.0333330 | 1431377    | 0                                                           | 0                   | 0             | 1              | 1           |
| haarlem        | nl      | Central & Western Europe                         | 13                | 4.6500000   | 52.3666670 | 147736     | 0                                                           | 0                   | 0             | 0              | 0           |
| haarlemmermeer | nl      | Central & Western Europe                         | 13                | 4.6931280   | 52.3120580 | 131698     | 0                                                           | 0                   | 0             | 0              | 0           |
| habikino       | jp      | Honshu - Shikoku - Kyushu                        | 5                 | 135.5833430 | 34.5340620 | 121052     | 0                                                           | 0                   | 0             | 1              | 1           |
| habra          | in      | Ganges Delta & Plain                             | 13                | 88.6275000  | 22.8344440 | 139310     | 0                                                           | 0                   | 0             | 0              | 0           |
| hachinohe      | jp      | Honshu - Shikoku - Kyushu                        | 5                 | 141.4919440 | 40.5050000 | 239047     | 0                                                           | 0                   | 0             | 0              | 0           |
| hachioji       | jp      | Honshu - Shikoku - Kyushu                        | 5                 | 139.3238890 | 35.6558330 | 579402     | 0                                                           | 0                   | 0             | 3              | 3           |
| hadano         | jp      | Honshu - Shikoku - Kyushu                        | 5                 | 139.2236110 | 35.3711110 | 174284     | 0                                                           | 0                   | 0             | 1              | 1           |
| hadejia        | ng      | Lake Chad                                        | 0                 | 10.0444000  | 12.4498000 | 110761     | 0                                                           | 0                   | 0             | 0              | 0           |
| hafizabad      | pk      | Lower & Middle Indus                             | 2                 | 73.6854490  | 32.0678570 | 153701     | 0                                                           | 0                   | 0             | 0              | 0           |
| hagen          | de      | Central & Western Europe                         | 13                | 7.4666670   | 51.3500000 | 199497     | 0                                                           | 0                   | 0             | 2              | 2           |
| hagonoy        | ph      | Northern Philippine Islands                      | 1                 | 120.7336000 | 14.8321000 | 123789     | 0                                                           | 0                   | 0             | 0              | 0           |
| hai phong      | vn      | Song Hong                                        | 1                 | 106.6822220 | 20.8561110 | 602718     | 0                                                           | 0                   | 0             | 0              | 0           |
| haibowan       | cn      | Huang He Great Bend                              | 0                 | 106.8122220 | 39.6647220 | 218427     | 0                                                           | 0                   | 0             | 0              | 0           |
| haicheng       | cn      | Liao He                                          | 0                 | 122.7475370 | 40.8515820 | 191651     | 0                                                           | 0                   | 0             | 0              | 0           |
| haicheng       | cn      | Xi Yang                                          | 15                | 115.3317940 | 22.9753260 | 130386     | 0                                                           | 0                   | 0             | 0              | 0           |
| haifa          | il      | Coastal Levant                                   | 1                 | 34.9891670  | 32.8155560 | 269961     | 0                                                           | 0                   | 0             | 2              | 2           |
| haikou         | cn      | Hainan                                           | 1                 | 110.3416670 | 20.0458330 | 615835     | 0                                                           | 0                   | 0             | 0              | 0           |
| haikou         | cn      | Yunnan Lakes                                     | 0                 | 102.5754830 | 24.7798540 | 112644     | 0                                                           | 0                   | 0             | 0              | 0           |
| hailar         | cn      | Argun                                            | 0                 | 119.7000000 | 49.2000000 | 211066     | 0                                                           | 0                   | 0             | 0              | 0           |
| hailun         | cn      | Songhua Jiang                                    | 0                 | 126.9333330 | 47.4500000 | 109881     | 0                                                           | 0                   | 0             | 0              | 0           |
| haimen         | cn      | Coastal Fujian - Zeijang                         | 1                 | 116.6142180 | 23.1934860 | 125427     | 0                                                           | 0                   | 0             | 0              | 0           |
| hajipur        | in      | Ganges Delta & Plain                             | 13                | 85.2166670  | 25.6833330 | 133621     | 0                                                           | 0                   | 0             | 0              | 0           |

Table S2 Cities and freshwater reptiles

| City        | Country | Freshwater Ecoregions of the World (FEOW) Region | Regional richness | Longitude   | Latitude    | Population | # of freshwater reptile species within 50 km of city centre |                     |               |                |             |
|-------------|---------|--------------------------------------------------|-------------------|-------------|-------------|------------|-------------------------------------------------------------|---------------------|---------------|----------------|-------------|
|             |         |                                                  |                   |             |             |            | Lizard species                                              | Crocodilian species | Snake species | Turtle species | All species |
| hakodate    | jp      | Sakhalin, Hokkaido, & Sikhote - Alin Coast       | 0                 | 140.7366670 | 41.7758330  | 275733     | 0                                                           | 0                   | 0             | 0              | 0           |
| haldia      | in      | Ganges Delta & Plain                             | 13                | 88.0583330  | 22.0252780  | 207466     | 0                                                           | 0                   | 0             | 0              | 0           |
| haldwani    | in      | Ganges Delta & Plain                             | 13                | 79.5166670  | 29.2166670  | 139512     | 0                                                           | 0                   | 0             | 0              | 0           |
| halifax     | ca      | Scotia - Fundy                                   | 5                 | -63.6000000 | 44.6500000  | 266012     | 0                                                           | 0                   | 0             | 2              | 2           |
| halisahar   | in      | Ganges Delta & Plain                             | 13                | 88.4194440  | 22.9497220  | 128184     | 0                                                           | 0                   | 0             | 0              | 0           |
| halle       | de      | Central & Western Europe                         | 13                | 12.0000000  | 51.5000000  | 232452     | 0                                                           | 0                   | 0             | 2              | 2           |
| hamadan     | ir      | Namak                                            | 3                 | 48.5145560  | 34.7992160  | 514134     | 0                                                           | 0                   | 0             | 0              | 0           |
| hamamatsu   | jp      | Honshu - Shikoku - Kyushu                        | 5                 | 137.7333330 | 34.7000000  | 605105     | 0                                                           | 0                   | 0             | 0              | 0           |
| hamburg     | de      | Central & Western Europe                         | 13                | 10.0000000  | 53.5500000  | 1733846    | 0                                                           | 0                   | 0             | 1              | 1           |
| hami        | cn      | Dzungaria                                        | 0                 | 93.4500000  | 42.8000000  | 137072     | 0                                                           | 0                   | 0             | 0              | 0           |
| hamilton    | ca      | Laurentian Great Lakes                           | 16                | -79.8333330 | 43.2500000  | 653637     | 0                                                           | 0                   | 0             | 6              | 6           |
| hamilton    | nz      | New Zealand                                      | 2                 | 175.2833330 | -37.7833330 | 152642     | 0                                                           | 0                   | 0             | 6              | 6           |
| hamm        | de      | Central & Western Europe                         | 13                | 7.8000000   | 51.6833330  | 186289     | 0                                                           | 0                   | 0             | 1              | 1           |
| hampton     | us      | Appalachian Piedmont                             | 26                | -76.3455556 | 37.0297222  | 147993     | 0                                                           | 0                   | 1             | 11             | 12          |
| handa       | jp      | Honshu - Shikoku - Kyushu                        | 5                 | 136.9333330 | 34.8833330  | 116120     | 0                                                           | 0                   | 0             | 2              | 2           |
| handan      | cn      | Lower Huang He                                   | 0                 | 114.5333330 | 36.5666670  | 1358318    | 0                                                           | 0                   | 0             | 0              | 0           |
| hangu       | cn      | Lower Huang He                                   | 0                 | 117.7891670 | 39.2488890  | 208369     | 0                                                           | 0                   | 0             | 0              | 0           |
| hangzhou    | cn      | Lower Yangtze                                    | 4                 | 120.1614190 | 30.2936500  | 1878129    | 0                                                           | 0                   | 0             | 0              | 0           |
| hanoi       | vn      | Song Hong                                        | 1                 | 105.8500000 | 21.0333330  | 1431377    | 0                                                           | 0                   | 0             | 1              | 1           |
| hanover     | de      | Central & Western Europe                         | 13                | 9.7166670   | 52.3666670  | 519144     | 0                                                           | 0                   | 0             | 3              | 3           |
| hanumangarh | in      | Lower & Middle Indus                             | 2                 | 74.3166670  | 29.5833330  | 155698     | 0                                                           | 0                   | 0             | 0              | 0           |
| hanzhong    | cn      | Lower Yangtze                                    | 4                 | 107.0302780 | 33.0727780  | 145986     | 0                                                           | 0                   | 0             | 0              | 0           |
| haora       | in      | Ganges Delta & Plain                             | 13                | 88.3102780  | 22.5891670  | 1027771    | 1                                                           | 0                   | 0             | 0              | 1           |
| hapur       | in      | Ganges Delta & Plain                             | 13                | 77.7833330  | 28.7166670  | 242944     | 0                                                           | 0                   | 0             | 0              | 0           |
| harare      | zw      | Zambeian Highveld                                | 3                 | 31.0447222  | -17.8177778 | 2213701    | 1                                                           | 0                   | 0             | 0              | 1           |

Table S2 Cities and freshwater reptiles

| City       | Country | Freshwater Ecoregions of the World (FEOW) Region   | Regional richness | Longitude    | Latitude   | Population | # of freshwater reptile species within 50 km of city centre |                     |               |                |             |
|------------|---------|----------------------------------------------------|-------------------|--------------|------------|------------|-------------------------------------------------------------|---------------------|---------------|----------------|-------------|
|            |         |                                                    |                   |              |            |            | Lizard species                                              | Crocodilian species | Snake species | Turtle species | All species |
| harbin     | cn      | Songhua Jiang                                      | 0                 | 126.6500000  | 45.7500000 | 3229883    | 0                                                           | 0                   | 0             | 0              | 0           |
| hardoi     | in      | Ganges Delta & Plain                               | 13                | 80.1500000   | 27.1166670 | 122647     | 0                                                           | 0                   | 0             | 0              | 0           |
| hargeysa   | so      | Horn of Africa                                     | 0                 | 44.0666667   | 9.5833333  | 478283     | 0                                                           | 0                   | 0             | 0              | 0           |
| haridwar   | in      | Ganges Delta & Plain                               | 13                | 78.1666670   | 29.9666670 | 186099     | 0                                                           | 0                   | 0             | 0              | 0           |
| hartford   | us      | Northeast US & Southeast Canada Atlantic Drainages | 18                | -72.6855556  | 41.7636111 | 124019     | 0                                                           | 0                   | 0             | 8              | 8           |
| hassan     | in      | Southeastern Ghats                                 | 3                 | 76.0994440   | 13.0005560 | 128542     | 0                                                           | 0                   | 0             | 0              | 0           |
| hat yai    | th      | Malay Peninsula Eastern Slope                      | 12                | 100.4766820  | 7.0083590  | 191696     | 0                                                           | 0                   | 0             | 1              | 1           |
| hathras    | in      | Ganges Delta & Plain                               | 13                | 78.0500000   | 27.6000000 | 126895     | 0                                                           | 1                   | 0             | 0              | 1           |
| hayward    | us      | Sacramento - San Joaquin                           | 10                | -122.0797222 | 37.6688889 | 140494     | 0                                                           | 0                   | 0             | 7              | 7           |
| hazaribag  | in      | Ganges Delta & Plain                               | 13                | 85.3500000   | 23.9833330 | 140079     | 0                                                           | 0                   | 0             | 0              | 0           |
| hebi       | cn      | Lower Huang He                                     | 0                 | 114.1925000  | 35.8991670 | 244662     | 0                                                           | 0                   | 0             | 0              | 0           |
| hefei      | cn      | Lower Yangtze                                      | 4                 | 117.2808330  | 31.8638890 | 1388904    | 0                                                           | 0                   | 0             | 0              | 0           |
| hegang     | cn      | Songhua Jiang                                      | 0                 | 130.3666670  | 47.4000000 | 743307     | 0                                                           | 0                   | 0             | 0              | 0           |
| heidelberg | de      | Central & Western Europe                           | 13                | 8.7000000    | 49.4166670 | 144703     | 0                                                           | 0                   | 0             | 3              | 3           |
| heihe      | cn      | Middle Amur                                        | 0                 | 127.4666670  | 50.2666670 | 109427     | 0                                                           | 0                   | 0             | 0              | 0           |
| heilbronn  | de      | Central & Western Europe                           | 13                | 9.2200000    | 49.1402780 | 121822     | 0                                                           | 0                   | 0             | 5              | 5           |
| helsinki   | fi      | Northern Baltic Drainages                          | 2                 | 24.9341670   | 60.1755560 | 558457     | 0                                                           | 0                   | 0             | 0              | 0           |
| henderson  | us      | Vegas - Virgin                                     | 2                 | -114.9811111 | 36.0397222 | 239757     | 0                                                           | 0                   | 0             | 3              | 3           |
| hengshan   | cn      | Lower Amur                                         | 0                 | 130.9166670  | 45.2000000 | 164844     | 0                                                           | 0                   | 0             | 0              | 0           |
| hengshui   | cn      | Lower Huang He                                     | 0                 | 115.7011110  | 37.7322220 | 456356     | 0                                                           | 0                   | 0             | 0              | 0           |
| hengyang   | cn      | Lower Yangtze                                      | 4                 | 112.6150000  | 26.8880560 | 759602     | 0                                                           | 0                   | 0             | 0              | 0           |
| henzada    | mm      | Sitang - Irawaddy                                  | 0                 | 95.4666667   | 17.6333333 | 134964     | 0                                                           | 0                   | 0             | 0              | 0           |
| herat      | af      | Upper Amu Darya                                    | 0                 | 62.1996730   | 34.3481670 | 272880     | 0                                                           | 0                   | 0             | 0              | 0           |
| hermosillo | mx      | Sonora                                             | 9                 | -110.9666670 | 29.0666670 | 595833     | 0                                                           | 0                   | 0             | 1              | 1           |

Table S2 Cities and freshwater reptiles

| City             | Country | Freshwater Ecoregions of the World (FEOW) Region | Regional richness | Longitude    | Latitude    | Population | # of freshwater reptile species within 50 km of city centre |                     |               |                |             |
|------------------|---------|--------------------------------------------------|-------------------|--------------|-------------|------------|-------------------------------------------------------------|---------------------|---------------|----------------|-------------|
|                  |         |                                                  |                   |              |             |            | Lizard species                                              | Crocodilian species | Snake species | Turtle species | All species |
| herne            | de      | Central & Western Europe                         | 13                | 7.2166670    | 51.5500000  | 173121     | 0                                                           | 0                   | 0             | 1              | 1           |
| heze             | cn      | Lower Yangtze                                    | 4                 | 115.4411110  | 35.2430560  | 254602     | 0                                                           | 0                   | 0             | 0              | 0           |
| hialeah          | us      | Florida Peninsula                                | 30                | -80.2783333  | 25.8572222  | 224840     | 1                                                           | 3                   | 1             | 11             | 16          |
| highlands ranch  | us      | Middle Missouri                                  | 12                | -104.9688889 | 39.5538889  | 101565     | 0                                                           | 0                   | 0             | 5              | 5           |
| higuey           | do      | Hispaniola                                       | 5                 | -68.7000000  | 18.6166667  | 123803     | 0                                                           | 0                   | 0             | 2              | 2           |
| hikone           | jp      | Biwa Ko                                          | 1                 | 136.2500000  | 35.2500000  | 110927     | 0                                                           | 0                   | 0             | 1              | 1           |
| hildesheim       | de      | Central & Western Europe                         | 13                | 9.9666670    | 52.1500000  | 102958     | 0                                                           | 0                   | 0             | 2              | 2           |
| himeji           | jp      | Honshu - Shikoku - Kyushu                        | 5                 | 134.7000000  | 34.8166670  | 481496     | 0                                                           | 0                   | 0             | 1              | 1           |
| hindupur         | in      | Southern Deccan Plateau                          | 0                 | 77.4933330   | 13.8288890  | 133313     | 0                                                           | 0                   | 0             | 0              | 0           |
| hino             | jp      | Honshu - Shikoku - Kyushu                        | 5                 | 139.4002780  | 35.6730560  | 171778     | 0                                                           | 0                   | 0             | 3              | 3           |
| hirakata         | jp      | Honshu - Shikoku - Kyushu                        | 5                 | 135.6333330  | 34.8000000  | 406335     | 0                                                           | 0                   | 0             | 2              | 2           |
| hiratsuka        | jp      | Honshu - Shikoku - Kyushu                        | 5                 | 139.3422220  | 35.3230560  | 259056     | 0                                                           | 0                   | 0             | 1              | 1           |
| hirosaki         | jp      | Honshu - Shikoku - Kyushu                        | 5                 | 140.4725000  | 40.5930560  | 174973     | 0                                                           | 0                   | 0             | 0              | 0           |
| hiroshima        | jp      | Honshu - Shikoku - Kyushu                        | 5                 | 132.7406220  | 34.4348440  | 1143850    | 0                                                           | 0                   | 0             | 1              | 1           |
| hisar            | in      | Lower & Middle Indus                             | 2                 | 75.7166670   | 29.1666670  | 296456     | 0                                                           | 0                   | 0             | 0              | 0           |
| hitachi          | jp      | Honshu - Shikoku - Kyushu                        | 5                 | 140.6500000  | 36.6000000  | 186311     | 0                                                           | 0                   | 0             | 0              | 0           |
| ho chi minh city | vn      | Mekong Delta                                     | 3                 | 106.6666670  | 10.7500000  | 3467426    | 1                                                           | 0                   | 0             | 0              | 1           |
| hoa binh         | vn      | Song Hong                                        | 1                 | 105.3383330  | 20.8133330  | 105268     | 0                                                           | 0                   | 0             | 0              | 0           |
| hobart           | au      | Southern Tasmania                                | 2                 | 147.3316650  | -42.8832090 | 204863     | 0                                                           | 0                   | 1             | 1              | 2           |
| hofu             | jp      | Honshu - Shikoku - Kyushu                        | 5                 | 131.5666670  | 34.0500000  | 116926     | 0                                                           | 0                   | 0             | 0              | 0           |
| hohhot           | cn      | Huang He Great Bend                              | 0                 | 111.6522220  | 40.8105560  | 774477     | 0                                                           | 0                   | 0             | 0              | 0           |
| holguin          | cu      | Cuba - Cayman Islands                            | 2                 | -76.2630556  | 20.8872222  | 319114     | 0                                                           | 0                   | 0             | 0              | 0           |
| hollywood        | us      | Florida Peninsula                                | 30                | -80.1497222  | 26.0108333  | 144821     | 1                                                           | 2                   | 1             | 11             | 15          |
| hong gai         | vn      | Song Hong                                        | 1                 | 107.0800000  | 20.9511110  | 148072     | 0                                                           | 0                   | 0             | 0              | 0           |
| honggang         | cn      | Songhua Jiang                                    | 0                 | 124.8666670  | 46.4666670  | 147977     | 0                                                           | 0                   | 0             | 0              | 0           |

Table S2 Cities and freshwater reptiles

| City        | Country | Freshwater Ecoregions of the World (FEOW) Region | Regional richness | Longitude    | Latitude    | Population | # of freshwater reptile species within 50 km of city centre |                     |               |                |             |
|-------------|---------|--------------------------------------------------|-------------------|--------------|-------------|------------|-------------------------------------------------------------|---------------------|---------------|----------------|-------------|
|             |         |                                                  |                   |              |             |            | Lizard species                                              | Crocodilian species | Snake species | Turtle species | All species |
| honghu      | cn      | Lower Yangtze                                    | 4                 | 113.4666670  | 29.8166670  | 175761     | 0                                                           | 0                   | 0             | 0              | 0           |
| honolulu    | us      | Hawaiian Islands                                 | 2                 | -157.8583333 | 21.3069444  | 384241     | 0                                                           | 0                   | 0             | 1              | 1           |
| horlivka    | ua      | Don                                              | 1                 | 38.0541890   | 48.3469810  | 278548     | 0                                                           | 0                   | 0             | 0              | 0           |
| hortolandia | br      | Upper Parana                                     | 3                 | -47.2500000  | -22.8500000 | 203537     | 0                                                           | 0                   | 0             | 1              | 1           |
| hoshangabad | in      | Namuda - Tapi                                    | 1                 | 77.7166670   | 22.7500000  | 109370     | 0                                                           | 0                   | 0             | 0              | 0           |
| hoshiarpur  | in      | Lower & Middle Indus                             | 2                 | 75.9172220   | 31.5322220  | 158154     | 0                                                           | 0                   | 0             | 0              | 0           |
| hospet      | in      | Southern Deccan Plateau                          | 0                 | 76.4000000   | 15.2666670  | 197862     | 0                                                           | 0                   | 0             | 0              | 0           |
| hosur       | in      | Southeastern Ghats                               | 3                 | 77.8166670   | 12.7166670  | 103769     | 0                                                           | 0                   | 0             | 0              | 0           |
| houma       | cn      | Lower Huang He                                   | 0                 | 111.3566010  | 35.6135800  | 100630     | 0                                                           | 0                   | 0             | 0              | 0           |
| houston     | us      | Sabine - Galveston                               | 29                | -95.3630556  | 29.7630556  | 2027712    | 0                                                           | 1                   | 1             | 13             | 15          |
| hrodna      | by      | Central & Western Europe                         | 13                | 23.8147222   | 53.6813889  | 317366     | 0                                                           | 0                   | 0             | 1              | 1           |
| hsichih     | tw      | Western Taiwan                                   | 2                 | 121.6505556  | 25.0691667  | 213899     | 0                                                           | 0                   | 0             | 2              | 2           |
| hsinchu     | tw      | Western Taiwan                                   | 2                 | 120.9713889  | 24.8047222  | 413683     | 0                                                           | 0                   | 0             | 1              | 1           |
| hsintien    | tw      | Western Taiwan                                   | 2                 | 121.5333333  | 24.9500000  | 275698     | 0                                                           | 0                   | 0             | 2              | 2           |
| huadian     | cn      | Songhua Jiang                                    | 0                 | 126.7477780  | 42.9633330  | 139047     | 0                                                           | 0                   | 0             | 0              | 0           |
| huaibei     | cn      | Lower Yangtze                                    | 4                 | 116.7916670  | 33.9744440  | 903039     | 0                                                           | 0                   | 0             | 0              | 0           |
| huaihua     | cn      | Lower Yangtze                                    | 4                 | 109.9591670  | 27.5494440  | 127322     | 0                                                           | 0                   | 0             | 0              | 0           |
| huainan     | cn      | Lower Yangtze                                    | 4                 | 116.9969440  | 32.6263890  | 1027655    | 0                                                           | 0                   | 0             | 0              | 0           |
| huaiyin     | cn      | Lower Yangtze                                    | 4                 | 119.0191670  | 33.5886110  | 555230     | 0                                                           | 0                   | 0             | 0              | 0           |
| huambo      | ao      | Cuanza                                           | 3                 | 15.7391670   | -12.7761110 | 226177     | 0                                                           | 0                   | 0             | 0              | 0           |
| huancayo    | pe      | Amazonas High Andes                              | 1                 | -75.2333333  | -12.0666667 | 380098     | 0                                                           | 0                   | 0             | 0              | 0           |
| huangcun    | cn      | Lower Huang He                                   | 0                 | 116.3291670  | 39.7213890  | 104904     | 0                                                           | 0                   | 0             | 0              | 0           |
| huangpu     | cn      | Xi Yang                                          | 15                | 113.5121480  | 23.0533250  | 116307     | 0                                                           | 0                   | 0             | 0              | 0           |
| huangyan    | cn      | Coastal Fujian - Zeijang                         | 1                 | 121.2594440  | 28.6477780  | 150448     | 0                                                           | 0                   | 0             | 0              | 0           |
| huangzhou   | cn      | Lower Yangtze                                    | 4                 | 114.8000000  | 30.4500000  | 122563     | 0                                                           | 0                   | 0             | 0              | 0           |

Table S2 Cities and freshwater reptiles

| City             | Country | Freshwater Ecoregions of the World (FEOW) Region | Regional richness | Longitude    | Latitude    | Population | # of freshwater reptile species within 50 km of city centre |                     |               |                |             |
|------------------|---------|--------------------------------------------------|-------------------|--------------|-------------|------------|-------------------------------------------------------------|---------------------|---------------|----------------|-------------|
|                  |         |                                                  |                   |              |             |            | Lizard species                                              | Crocodilian species | Snake species | Turtle species | All species |
| huanuco          | pe      | Amazonas High Andes                              | 1                 | -76.2333333  | -9.9166667  | 148466     | 0                                                           | 0                   | 0             | 0              | 0           |
| hubli            | in      | Western Ghats                                    | 4                 | 75.1666670   | 15.3500000  | 840285     | 0                                                           | 0                   | 0             | 0              | 0           |
| huddersfield     | gb      | Central & Western Europe                         | 13                | -1.7833330   | 53.6500000  | 149018     | 0                                                           | 0                   | 0             | 1              | 1           |
| hue              | vn      | Southern Annam                                   | 2                 | 107.6000000  | 16.4666670  | 287228     | 0                                                           | 0                   | 0             | 0              | 0           |
| huelva           | es      | Southern Iberia                                  | 8                 | -6.9494640   | 37.2714470  | 145901     | 0                                                           | 1                   | 0             | 6              | 7           |
| huicheng         | cn      | Coastal Fujian - Zeijang                         | 1                 | 116.2898800  | 23.0384490  | 125919     | 0                                                           | 0                   | 0             | 0              | 0           |
| huixquilucan     | mx      | Lerma - Chapala                                  | 10                | -99.3513890  | 19.3602780  | 124852     | 0                                                           | 0                   | 0             | 5              | 5           |
| huizhou          | cn      | Xi Yang                                          | 15                | 114.4000000  | 23.0833330  | 289201     | 0                                                           | 0                   | 0             | 0              | 0           |
| hulan            | cn      | Songhua Jiang                                    | 0                 | 126.6000000  | 45.9833330  | 109104     | 0                                                           | 0                   | 0             | 0              | 0           |
| hulan ergi       | cn      | Songhua Jiang                                    | 0                 | 123.6333330  | 47.2041670  | 265344     | 0                                                           | 0                   | 0             | 0              | 0           |
| humen            | cn      | Xi Yang                                          | 15                | 113.6730640  | 22.8189850  | 191891     | 0                                                           | 0                   | 0             | 0              | 0           |
| huntington beach | us      | Southern California Coastal - Baja California    | 12                | -117.9983333 | 33.6602778  | 195968     | 0                                                           | 0                   | 0             | 7              | 7           |
| huntsville       | us      | Tennessee                                        | 17                | -86.5861111  | 34.7302778  | 167528     | 0                                                           | 1                   | 1             | 8              | 10          |
| huzhou           | cn      | Lower Yangtze                                    | 4                 | 120.0932970  | 30.8703010  | 158320     | 0                                                           | 0                   | 0             | 0              | 0           |
| hyderabad        | pk      | Lower & Middle Indus                             | 2                 | 68.3736560   | 25.3924200  | 1386840    | 0                                                           | 0                   | 0             | 0              | 0           |
| hyderabad        | in      | Southern Deccan Plateau                          | 0                 | 78.4744440   | 17.3752780  | 3598199    | 0                                                           | 0                   | 0             | 0              | 0           |
| iasi             | ro      | Dniester - Lower Danube                          | 3                 | 27.6000000   | 47.1666670  | 318014     | 0                                                           | 0                   | 0             | 0              | 0           |
| ibadan           | ng      | Bight Drainages                                  | 7                 | 3.8963890    | 7.3877780   | 3565810    | 1                                                           | 0                   | 0             | 0              | 1           |
| ibague           | co      | Magdalena - Sinu                                 | 15                | -75.2322220  | 4.4388890   | 421689     | 1                                                           | 0                   | 0             | 0              | 1           |
| ibaraki          | jp      | Honshu - Shikoku - Kyushu                        | 5                 | 135.5666670  | 34.8166670  | 263408     | 0                                                           | 0                   | 0             | 2              | 2           |
| ibarra           | ec      | North Andean Pacific Slopes - Rio Atrato         | 14                | -78.1166667  | 0.3500000   | 108666     | 0                                                           | 0                   | 0             | 0              | 0           |
| ibb              | ye      | Southwestern Arabian Coast                       | 1                 | 44.1833333   | 13.9666667  | 234992     | 0                                                           | 0                   | 0             | 0              | 0           |
| ibirite          | br      | S. Francisco                                     | 0                 | -44.0666670  | -20.0333330 | 141376     | 0                                                           | 0                   | 0             | 0              | 0           |
| ica              | pe      | Central Andean Pacific Slopes                    | 0                 | -75.7255556  | -14.0680556 | 247687     | 0                                                           | 0                   | 0             | 0              | 0           |
| ichalkaranji     | in      | Southern Deccan Plateau                          | 0                 | 74.4666670   | 16.7000000  | 274405     | 0                                                           | 0                   | 0             | 0              | 0           |

Table S2 Cities and freshwater reptiles

| City        | Country | Freshwater Ecoregions of the World (FEOW) Region | Regional richness | Longitude   | Latitude    | Population | # of freshwater reptile species within 50 km of city centre |                     |               |                |             |
|-------------|---------|--------------------------------------------------|-------------------|-------------|-------------|------------|-------------------------------------------------------------|---------------------|---------------|----------------|-------------|
|             |         |                                                  |                   |             |             |            | Lizard species                                              | Crocodilian species | Snake species | Turtle species | All species |
| ichihara    | jp      | Honshu - Shikoku - Kyushu                        | 5                 | 140.0833330 | 35.5166670  | 283537     | 0                                                           | 0                   | 0             | 3              | 3           |
| ichikawa    | jp      | Honshu - Shikoku - Kyushu                        | 5                 | 139.9247220 | 35.7197220  | 458249     | 0                                                           | 0                   | 0             | 3              | 3           |
| ichinomiya  | jp      | Honshu - Shikoku - Kyushu                        | 5                 | 136.8000000 | 35.3000000  | 280333     | 0                                                           | 0                   | 0             | 1              | 1           |
| idlib       | sy      | Upper Tigris & Euphrates                         | 3                 | 36.6316667  | 35.9297222  | 110503     | 0                                                           | 0                   | 0             | 0              | 0           |
| ife         | ng      | Bight Drainages                                  | 7                 | 4.5666670   | 7.4666670   | 372191     | 0                                                           | 0                   | 0             | 0              | 0           |
| igboho      | ng      | Bight Drainages                                  | 7                 | 3.7500000   | 8.8333330   | 136772     | 0                                                           | 0                   | 0             | 0              | 0           |
| iguala      | mx      | Rio Balsas                                       | 10                | -99.5333330 | 18.3500000  | 112111     | 0                                                           | 0                   | 0             | 0              | 0           |
| iida        | jp      | Honshu - Shikoku - Kyushu                        | 5                 | 137.8333330 | 35.5166670  | 107112     | 0                                                           | 0                   | 0             | 0              | 0           |
| ijero       | ng      | Bight Drainages                                  | 7                 | 5.0742000   | 7.8139000   | 167644     | 0                                                           | 0                   | 0             | 0              | 0           |
| ikare       | ng      | Bight Drainages                                  | 7                 | 5.7500000   | 7.5166670   | 182779     | 0                                                           | 0                   | 0             | 0              | 0           |
| ikere       | ng      | Bight Drainages                                  | 7                 | 5.2322480   | 7.4913280   | 103062     | 0                                                           | 0                   | 0             | 0              | 0           |
| ikire       | ng      | Bight Drainages                                  | 7                 | 4.1833330   | 7.3500000   | 222174     | 1                                                           | 0                   | 0             | 0              | 1           |
| ikirun      | ng      | Bight Drainages                                  | 7                 | 4.6666670   | 7.9166670   | 134246     | 0                                                           | 0                   | 0             | 0              | 0           |
| ikole       | ng      | Lower Niger - Benue                              | 2                 | 5.5106000   | 7.7897000   | 110874     | 0                                                           | 0                   | 0             | 0              | 0           |
| ikoma       | jp      | Honshu - Shikoku - Kyushu                        | 5                 | 135.7000000 | 34.6833330  | 117604     | 0                                                           | 0                   | 0             | 2              | 2           |
| ikorodu     | ng      | Bight Drainages                                  | 7                 | 3.5086730   | 6.6154830   | 313468     | 0                                                           | 1                   | 0             | 0              | 1           |
| ikot ekpene | ng      | Northern Gulf of Guinea Drainages - Bioko        | 1                 | 7.9341950   | 5.1814750   | 254821     | 0                                                           | 0                   | 0             | 0              | 0           |
| ila         | ng      | Lower Niger - Benue                              | 2                 | 4.9000000   | 8.0166670   | 179204     | 0                                                           | 0                   | 0             | 0              | 0           |
| ilam        | ir      | Lower Tigris & Euphrates                         | 1                 | 46.4227000  | 33.6374000  | 140951     | 0                                                           | 0                   | 0             | 0              | 0           |
| ilawe       | ng      | Bight Drainages                                  | 7                 | 5.1086000   | 7.5986000   | 182896     | 0                                                           | 0                   | 0             | 0              | 0           |
| ilebo       | cd      | Kasai                                            | 1                 | 20.5833330  | -4.3166670  | 107086     | 0                                                           | 0                   | 0             | 0              | 0           |
| ileshe      | ng      | Lower Niger - Benue                              | 2                 | 3.4166670   | 8.9166670   | 277922     | 0                                                           | 0                   | 0             | 0              | 0           |
| ilheus      | br      | Northeastern Mata Atlantica                      | 1                 | -39.0333330 | -14.8166670 | 155503     | 0                                                           | 0                   | 0             | 0              | 0           |
| iligan      | ph      | Mindanao                                         | 1                 | 124.2361110 | 8.2308330   | 267854     | 0                                                           | 0                   | 0             | 0              | 0           |
| ilobu       | ng      | Bight Drainages                                  | 7                 | 4.4833330   | 7.8333330   | 118097     | 0                                                           | 0                   | 0             | 0              | 0           |

Table S2 Cities and freshwater reptiles

| City         | Country | Freshwater Ecoregions of the World (FEOW) Region | Regional richness | Longitude    | Latitude    | Population | # of freshwater reptile species within 50 km of city centre |                     |               |                |             |
|--------------|---------|--------------------------------------------------|-------------------|--------------|-------------|------------|-------------------------------------------------------------|---------------------|---------------|----------------|-------------|
|              |         |                                                  |                   |              |             |            | Lizard species                                              | Crocodilian species | Snake species | Turtle species | All species |
| iloilo       | ph      | Northern Philippine Islands                      | 1                 | 122.5644440  | 10.6969440  | 387748     | 0                                                           | 0                   | 0             | 0              | 0           |
| ilorin       | ng      | Lower Niger - Benue                              | 2                 | 4.5500000    | 8.5000000   | 814246     | 0                                                           | 0                   | 0             | 0              | 0           |
| imabari      | jp      | Honshu - Shikoku - Kyushu                        | 5                 | 132.9666670  | 34.0666670  | 115356     | 0                                                           | 0                   | 0             | 1              | 1           |
| imperatriz   | br      | Tocantins - Araguaia                             | 0                 | -47.4833330  | -5.5333330  | 218110     | 0                                                           | 0                   | 0             | 0              | 0           |
| imphal       | in      | Sitang - Irawaddy                                | 0                 | 93.9500000   | 24.8166670  | 223537     | 0                                                           | 0                   | 0             | 0              | 0           |
| inazawa      | jp      | Honshu - Shikoku - Kyushu                        | 5                 | 136.7833330  | 35.2500000  | 102131     | 0                                                           | 0                   | 0             | 2              | 2           |
| indaiatuba   | br      | Upper Parana                                     | 3                 | -47.2333330  | -23.0833330 | 179914     | 0                                                           | 1                   | 0             | 2              | 3           |
| independence | us      | Central Prairie                                  | 17                | -94.4152778  | 39.0911111  | 110675     | 0                                                           | 0                   | 0             | 4              | 4           |
| indianapolis | us      | Teays - Old Ohio                                 | 17                | -86.1580556  | 39.7683333  | 773283     | 0                                                           | 0                   | 0             | 4              | 4           |
| indore       | in      | Ganges Delta & Plain                             | 13                | 75.8333330   | 22.7166670  | 1837230    | 0                                                           | 0                   | 0             | 0              | 0           |
| indramayu    | id      | Southern Sumatra - Western Java                  | 8                 | 108.3200000  | -6.3263890  | 123271     | 0                                                           | 0                   | 0             | 0              | 0           |
| inegol       | tr      | Northern Anatolia                                | 2                 | 29.5133330   | 40.0780560  | 134030     | 0                                                           | 0                   | 0             | 0              | 0           |
| inglewood    | us      | Southern California Coastal - Baja California    | 12                | -118.3522222 | 33.9616667  | 116158     | 0                                                           | 0                   | 0             | 8              | 8           |
| ingolstadt   | de      | Upper Danube                                     | 5                 | 11.4333330   | 48.7666670  | 120598     | 0                                                           | 0                   | 0             | 0              | 0           |
| ingraj bazar | in      | Ganges Delta & Plain                             | 13                | 88.1500000   | 25.0000000  | 170056     | 0                                                           | 0                   | 0             | 0              | 0           |
| inisa        | ng      | Bight Drainages                                  | 7                 | 4.2833330    | 7.8000000   | 164172     | 0                                                           | 0                   | 0             | 0              | 0           |
| innsbruck    | at      | Upper Danube                                     | 5                 | 11.4000000   | 47.2666670  | 112467     | 0                                                           | 0                   | 0             | 0              | 0           |
| ipatinga     | br      | Northeastern Mata Atlantica                      | 1                 | -42.5333330  | -19.5000000 | 228750     | 0                                                           | 0                   | 0             | 0              | 0           |
| ipoh         | my      | Northern Central Sumatra - Western Malaysia      | 7                 | 101.0829000  | 4.5841000   | 673346     | 1                                                           | 0                   | 0             | 0              | 1           |
| ipswich      | gb      | Central & Western Europe                         | 13                | 1.1666670    | 52.0833330  | 143768     | 0                                                           | 0                   | 0             | 1              | 1           |
| iquique      | cl      | Atacama                                          | 0                 | -70.1430600  | -20.2208300 | 227501     | 0                                                           | 0                   | 0             | 0              | 0           |
| iquitos      | pe      | Amazonas Lowlands                                | 19                | -73.2472222  | -3.7480556  | 439114     | 0                                                           | 3                   | 0             | 1              | 4           |
| iraklion     | gr      | Unassigned                                       | #N/A              | 25.1305556   | 35.3250000  | 137155     | 0                                                           | 0                   | 0             | 2              | 2           |
| iranshahr    | ir      | Baluchistan                                      | 1                 | 60.6847580   | 27.2024460  | 131242     | 0                                                           | 0                   | 0             | 0              | 0           |

Table S2 Cities and freshwater reptiles

| City       | Country | Freshwater Ecoregions of the World (FEOW) Region | Regional richness | Longitude    | Latitude    | Population | # of freshwater reptile species within 50 km of city centre |                     |               |                |             |
|------------|---------|--------------------------------------------------|-------------------|--------------|-------------|------------|-------------------------------------------------------------|---------------------|---------------|----------------|-------------|
|            |         |                                                  |                   |              |             |            | Lizard species                                              | Crocodilian species | Snake species | Turtle species | All species |
| irapuato   | mx      | Lerma - Chapala                                  | 10                | -101.3500000 | 20.6833330  | 339568     | 0                                                           | 0                   | 0             | 2              | 2           |
| irbid      | jo      | Jordan River                                     | 3                 | 35.8500000   | 32.5555560  | 296050     | 0                                                           | 0                   | 0             | 2              | 2           |
| irbil      | iq      | Upper Tigris & Euphrates                         | 3                 | 44.0088889   | 36.1900000  | 932854     | 0                                                           | 0                   | 0             | 0              | 0           |
| iringa     | tz      | Coastal East Africa                              | 4                 | 35.7000000   | -7.7666667  | 111831     | 0                                                           | 0                   | 0             | 0              | 0           |
| irkutsk    | ru      | Yenisei                                          | 0                 | 104.2963890  | 52.2977780  | 586702     | 0                                                           | 0                   | 0             | 0              | 0           |
| iruma      | jp      | Honshu - Shikoku - Kyushu                        | 5                 | 139.4120030  | 35.8455160  | 151548     | 0                                                           | 0                   | 0             | 3              | 3           |
| irvine     | us      | Southern California Coastal - Baja California    | 12                | -117.8222222 | 33.6694444  | 189297     | 0                                                           | 0                   | 0             | 6              | 6           |
| irving     | us      | Sabine - Galveston                               | 29                | -96.9486111  | 32.8138889  | 193825     | 0                                                           | 1                   | 1             | 14             | 16          |
| ise        | ng      | Bight Drainages                                  | 7                 | 5.4281000    | 7.4632000   | 190077     | 0                                                           | 0                   | 0             | 0              | 0           |
| isehara    | jp      | Honshu - Shikoku - Kyushu                        | 5                 | 139.3077780  | 35.3905560  | 103402     | 0                                                           | 0                   | 0             | 1              | 1           |
| isesaki    | jp      | Honshu - Shikoku - Kyushu                        | 5                 | 139.2000000  | 36.3166670  | 130694     | 0                                                           | 0                   | 0             | 0              | 0           |
| iseyin     | ng      | Bight Drainages                                  | 7                 | 3.6000000    | 7.9666670   | 340707     | 0                                                           | 0                   | 0             | 0              | 0           |
| ishinomaki | jp      | Honshu - Shikoku - Kyushu                        | 5                 | 141.3000000  | 38.4166670  | 117235     | 0                                                           | 0                   | 0             | 0              | 0           |
| isiro      | cd      | Cuvette Centrale                                 | 0                 | 27.6166670   | 2.7666670   | 127068     | 0                                                           | 0                   | 0             | 0              | 0           |
| iskenderun | tr      | Southern Anatolia                                | 2                 | 36.1734680   | 36.5871850  | 160046     | 0                                                           | 0                   | 0             | 0              | 0           |
| islamabad  | pk      | Lower & Middle Indus                             | 2                 | 73.0551000   | 33.6900000  | 756105     | 0                                                           | 0                   | 0             | 0              | 0           |
| ismailia   | eg      | Nile Delta                                       | 0                 | 32.2666667   | 30.5833333  | 284851     | 0                                                           | 0                   | 0             | 0              | 0           |
| isparta    | tr      | Central Anatolia                                 | 2                 | 30.5522220   | 37.7644440  | 172424     | 0                                                           | 0                   | 0             | 0              | 0           |
| istanbul   | tr      | Thrace                                           | 3                 | 28.9647220   | 41.0186110  | 9797536    | 0                                                           | 0                   | 0             | 0              | 0           |
| itaborai   | br      | Fluminense                                       | 1                 | -42.8666670  | -22.7500000 | 182500     | 0                                                           | 1                   | 0             | 0              | 1           |
| itabuna    | br      | Northeastern Mata Atlantica                      | 1                 | -39.2666670  | -14.8000000 | 205666     | 0                                                           | 0                   | 0             | 0              | 0           |
| itaguai    | br      | Paraiba do Sul                                   | 0                 | -43.7738210  | -22.8707550 | 100756     | 0                                                           | 0                   | 0             | 0              | 0           |
| itagui     | co      | Magdalena - Sinu                                 | 15                | -75.6113890  | 6.1719440   | 281858     | 1                                                           | 0                   | 0             | 2              | 3           |
| itajai     | br      | Southeastern Mata Atlantica                      | 2                 | -48.6500000  | -26.8833330 | 155719     | 0                                                           | 0                   | 0             | 0              | 0           |
| itami      | jp      | Honshu - Shikoku - Kyushu                        | 5                 | 135.4166670  | 34.7666670  | 193526     | 0                                                           | 0                   | 0             | 2              | 2           |

Table S2 Cities and freshwater reptiles

| City                 | Country | Freshwater Ecoregions of the World (FEOW) Region | Regional richness | Longitude   | Latitude    | Population | # of freshwater reptile species within 50 km of city centre |                     |               |                |             |
|----------------------|---------|--------------------------------------------------|-------------------|-------------|-------------|------------|-------------------------------------------------------------|---------------------|---------------|----------------|-------------|
|                      |         |                                                  |                   |             |             |            | Lizard species                                              | Crocodilian species | Snake species | Turtle species | All species |
| itapecerica da serra | br      | Upper Parana                                     | 3                 | -46.8333330 | -23.7166670 | 151608     | 0                                                           | 0                   | 0             | 1              | 1           |
| itapetininga         | br      | Upper Parana                                     | 3                 | -48.0500000 | -23.6000000 | 126245     | 0                                                           | 0                   | 0             | 0              | 0           |
| itapevi              | br      | Upper Parana                                     | 3                 | -46.9333330 | -23.5500000 | 201752     | 0                                                           | 1                   | 0             | 1              | 2           |
| itaquaquecetuba      | br      | Upper Parana                                     | 3                 | -46.3500000 | -23.4833330 | 336686     | 0                                                           | 0                   | 0             | 1              | 1           |
| itarsi               | in      | Namuda - Tapi                                    | 1                 | 77.7500000  | 22.6166670  | 100585     | 0                                                           | 0                   | 0             | 0              | 0           |
| itu                  | br      | Upper Parana                                     | 3                 | -47.3166670 | -23.2666670 | 137589     | 0                                                           | 1                   | 0             | 2              | 3           |
| ivanovo              | ru      | Volga - Ural                                     | 0                 | 40.9713920  | 56.9971920  | 420843     | 0                                                           | 0                   | 0             | 0              | 0           |
| iwaki                | jp      | Honshu - Shikoku - Kyushu                        | 5                 | 140.8833330 | 37.0500000  | 357313     | 0                                                           | 0                   | 0             | 0              | 0           |
| iwakuni              | jp      | Honshu - Shikoku - Kyushu                        | 5                 | 132.1833330 | 34.1500000  | 104006     | 0                                                           | 0                   | 0             | 1              | 1           |
| iwatsuki             | jp      | Honshu - Shikoku - Kyushu                        | 5                 | 139.6919440 | 35.9427780  | 108835     | 0                                                           | 0                   | 0             | 3              | 3           |
| iwo                  | ng      | Bight Drainages                                  | 7                 | 4.1833330   | 7.6333330   | 250459     | 1                                                           | 0                   | 0             | 0              | 1           |
| ixtapaluca           | mx      | Lerma - Chapala                                  | 10                | -98.8833330 | 19.3166670  | 351015     | 0                                                           | 0                   | 0             | 5              | 5           |
| izhevsk              | ru      | Volga - Ural                                     | 0                 | 53.2044790  | 56.8497560  | 631044     | 0                                                           | 0                   | 0             | 0              | 0           |
| izmir                | tr      | Western Anatolia                                 | 5                 | 27.1383760  | 38.4127260  | 2501895    | 0                                                           | 0                   | 0             | 0              | 0           |
| izmit                | tr      | Thrace                                           | 3                 | 29.9169440  | 40.7669440  | 196672     | 0                                                           | 0                   | 0             | 0              | 0           |
| izumi                | jp      | Honshu - Shikoku - Kyushu                        | 5                 | 135.4333330 | 34.4833330  | 189087     | 0                                                           | 0                   | 0             | 1              | 1           |
| jabalpur             | in      | Namuda - Tapi                                    | 1                 | 79.9500000  | 23.1666670  | 1030276    | 0                                                           | 0                   | 0             | 0              | 0           |
| jaboatao             | br      | Northeastern Caatinga & Coastal Drainages        | 1                 | -35.0166670 | -8.1166670  | 702632     | 0                                                           | 0                   | 0             | 0              | 0           |
| jacarei              | br      | Paraiba do Sul                                   | 0                 | -45.9666670 | -23.3166670 | 213114     | 0                                                           | 0                   | 0             | 0              | 0           |
| jackson              | us      | Lower Mississippi                                | 33                | -90.1847222 | 32.2986111  | 176696     | 0                                                           | 1                   | 0             | 3              | 4           |
| jacksonville         | us      | Florida Peninsula                                | 30                | -81.6558333 | 30.3319444  | 797557     | 0                                                           | 1                   | 1             | 7              | 9           |
| jacobabad            | pk      | Lower & Middle Indus                             | 2                 | 68.4387590  | 28.2810040  | 170653     | 0                                                           | 0                   | 0             | 0              | 0           |
| jaen                 | es      | Southern Iberia                                  | 8                 | -3.7901300  | 37.7724040  | 116291     | 0                                                           | 0                   | 0             | 3              | 3           |
| jaffna               | lk      | Sri Lanka Dry Zone                               | 5                 | 80.0000000  | 9.6666667   | 169126     | 0                                                           | 0                   | 0             | 0              | 0           |
| jagadhri             | in      | Ganges Delta & Plain                             | 13                | 77.3000000  | 30.1666670  | 112590     | 0                                                           | 0                   | 0             | 0              | 0           |

Table S2 Cities and freshwater reptiles

| City           | Country | Freshwater Ecoregions of the World (FEOW) Region | Regional richness | Longitude   | Latitude    | Population | # of freshwater reptile species within 50 km of city centre |                     |               |                |             |
|----------------|---------|--------------------------------------------------|-------------------|-------------|-------------|------------|-------------------------------------------------------------|---------------------|---------------|----------------|-------------|
|                |         |                                                  |                   |             |             |            | Lizard species                                              | Crocodilian species | Snake species | Turtle species | All species |
| jahrom         | ir      | Upper Tigris & Euphrates                         | 3                 | 53.5534000  | 28.5024000  | 107910     | 0                                                           | 0                   | 0             | 0              | 0           |
| jaipur         | in      | Ganges Delta & Plain                             | 13                | 75.8166670  | 26.9166670  | 2711937    | 0                                                           | 0                   | 0             | 0              | 0           |
| jakarta        | id      | Southern Sumatra - Western Java                  | 8                 | 106.8294440 | -6.1744440  | 8540306    | 1                                                           | 2                   | 2             | 0              | 5           |
| jalalabad      | af      | Indus Himalayan Foothills                        | 0                 | 70.4515300  | 34.4264680  | 200389     | 0                                                           | 0                   | 0             | 0              | 0           |
| jalandhar      | in      | Lower & Middle Indus                             | 2                 | 75.5791670  | 31.3255560  | 785234     | 0                                                           | 0                   | 0             | 0              | 0           |
| jalingo        | ng      | Lower Niger - Benue                              | 2                 | 11.3666670  | 8.8833330   | 117766     | 0                                                           | 0                   | 0             | 0              | 0           |
| jalna          | in      | Northern Deccan Plateau                          | 2                 | 75.8833330  | 19.8333330  | 262055     | 0                                                           | 0                   | 0             | 0              | 0           |
| jalpaiguri     | in      | Ganges Delta & Plain                             | 13                | 88.7333330  | 26.5166670  | 107843     | 0                                                           | 0                   | 0             | 0              | 0           |
| jamalpur       | bd      | Ganges Delta & Plain                             | 13                | 89.9333333  | 24.9166667  | 167914     | 0                                                           | 0                   | 0             | 0              | 0           |
| jamalpur       | in      | Ganges Delta & Plain                             | 13                | 86.5000000  | 25.3000000  | 100791     | 0                                                           | 0                   | 0             | 0              | 0           |
| jamame         | so      | Shebelle - Juba                                  | 0                 | 42.7505556  | 0.0722222   | 185270     | 0                                                           | 0                   | 0             | 0              | 0           |
| jambi          | id      | Southern Central Sumatra                         | 3                 | 103.6166670 | -1.6000000  | 420391     | 0                                                           | 0                   | 0             | 0              | 0           |
| jammu          | in      | Lower & Middle Indus                             | 2                 | 74.8666670  | 32.7333330  | 465600     | 0                                                           | 0                   | 0             | 0              | 0           |
| jamnagar       | in      | Lower & Middle Indus                             | 2                 | 70.0666670  | 22.4666670  | 492087     | 0                                                           | 0                   | 0             | 0              | 0           |
| jamshedpur     | in      | Ganges Delta & Plain                             | 13                | 86.1833330  | 22.8000000  | 616404     | 0                                                           | 0                   | 0             | 0              | 0           |
| jamuria        | in      | Ganges Delta & Plain                             | 13                | 87.0833330  | 23.7000000  | 160257     | 0                                                           | 0                   | 0             | 0              | 0           |
| jandira        | br      | Upper Parana                                     | 3                 | -46.9000000 | -23.5166670 | 113607     | 0                                                           | 0                   | 0             | 1              | 1           |
| jaragua do sul | br      | Southeastern Mata Atlantica                      | 2                 | -49.0666670 | -26.4833330 | 130132     | 0                                                           | 0                   | 0             | 0              | 0           |
| jaramana       | sy      | Arabian Interior                                 | 1                 | 36.3500000  | 33.4833333  | 189888     | 0                                                           | 0                   | 0             | 0              | 0           |
| jaranwala      | pk      | Lower & Middle Indus                             | 2                 | 73.4333330  | 31.3333330  | 119820     | 0                                                           | 0                   | 0             | 0              | 0           |
| jau            | br      | Upper Parana                                     | 3                 | -48.5500000 | -22.3000000 | 119209     | 0                                                           | 0                   | 0             | 0              | 0           |
| jaunpur        | in      | Ganges Delta & Plain                             | 13                | 82.6833330  | 25.7333330  | 169589     | 0                                                           | 0                   | 0             | 0              | 0           |
| jember         | id      | Indian Ocean Slope of Sumatra & Java             | 9                 | 113.7020000 | -8.1705000  | 298620     | 0                                                           | 0                   | 0             | 0              | 0           |
| jequie         | br      | Northeastern Mata Atlantica                      | 1                 | -40.0833330 | -13.8500000 | 127479     | 0                                                           | 0                   | 0             | 0              | 0           |
| jerez          | es      | Southern Iberia                                  | 8                 | -6.1360630  | 36.6864540  | 189230     | 0                                                           | 0                   | 0             | 4              | 4           |

Table S2 Cities and freshwater reptiles

| City        | Country | Freshwater Ecoregions of the World (FEOW) Region   | Regional richness | Longitude   | Latitude   | Population | # of freshwater reptile species within 50 km of city centre |                     |               |                |             |
|-------------|---------|----------------------------------------------------|-------------------|-------------|------------|------------|-------------------------------------------------------------|---------------------|---------------|----------------|-------------|
|             |         |                                                    |                   |             |            |            | Lizard species                                              | Crocodilian species | Snake species | Turtle species | All species |
| jersey city | us      | Northeast US & Southeast Canada Atlantic Drainages | 18                | -74.0780556 | 40.7280556 | 237681     | 0                                                           | 0                   | 0             | 12             | 12          |
| jerusalem   | il      | Jordan River                                       | 3                 | 35.2300000  | 31.7800000 | 714685     | 0                                                           | 0                   | 0             | 1              | 1           |
| jetpur      | in      | Lower & Middle Indus                               | 2                 | 70.6166670  | 21.7333330 | 118076     | 0                                                           | 0                   | 0             | 2              | 2           |
| jhang       | pk      | Lower & Middle Indus                               | 2                 | 72.3281400  | 31.3067730 | 341311     | 0                                                           | 0                   | 0             | 0              | 0           |
| jhansi      | in      | Ganges Delta & Plain                               | 13                | 78.5833330  | 25.4333330 | 412968     | 0                                                           | 0                   | 0             | 0              | 0           |
| jhelum      | pk      | Lower & Middle Indus                               | 2                 | 73.7263670  | 32.9331320 | 164128     | 0                                                           | 0                   | 0             | 0              | 0           |
| jhunjhun    | in      | Lower & Middle Indus                               | 2                 | 75.4014000  | 28.1307000 | 113201     | 0                                                           | 0                   | 0             | 0              | 0           |
| jiamusi     | cn      | Songhua Jiang                                      | 0                 | 130.3500000 | 46.8333330 | 549549     | 0                                                           | 0                   | 0             | 0              | 0           |
| jian        | cn      | Lower Yangtze                                      | 4                 | 114.9000000 | 27.0500000 | 171718     | 0                                                           | 0                   | 0             | 0              | 0           |
| jiangmen    | cn      | Xi Yang                                            | 15                | 113.0833330 | 22.5833330 | 532419     | 0                                                           | 0                   | 0             | 0              | 0           |
| jiangyin    | cn      | Lower Yangtze                                      | 4                 | 120.2685100 | 31.9050630 | 107918     | 0                                                           | 0                   | 0             | 0              | 0           |
| jiangyin    | cn      | Lower Yangtze                                      | 4                 | 120.3125670 | 31.9282490 | 107918     | 0                                                           | 0                   | 0             | 0              | 0           |
| jiangyou    | cn      | Upper Yangtze                                      | 0                 | 104.7166670 | 31.7666670 | 127225     | 0                                                           | 0                   | 0             | 0              | 0           |
| jiaohe      | cn      | Songhua Jiang                                      | 0                 | 127.3447220 | 43.7286110 | 123018     | 0                                                           | 0                   | 0             | 0              | 0           |
| jiaojiang   | cn      | Coastal Fujian - Zeijang                           | 1                 | 121.4427780 | 28.6802780 | 470804     | 0                                                           | 0                   | 0             | 0              | 0           |
| jiaozhou    | cn      | Lower Huang He                                     | 0                 | 120.0033330 | 36.2838890 | 165026     | 0                                                           | 0                   | 0             | 0              | 0           |
| jiaozuo     | cn      | Lower Huang He                                     | 0                 | 113.2330560 | 35.2397220 | 517540     | 0                                                           | 0                   | 0             | 0              | 0           |
| jiaxing     | cn      | Lower Yangtze                                      | 4                 | 120.7499970 | 30.7521980 | 466101     | 0                                                           | 0                   | 0             | 0              | 0           |
| jiayuguan   | cn      | Inner Mongolia Endorheic Basins                    | 0                 | 98.3000000  | 39.8166670 | 122396     | 0                                                           | 0                   | 0             | 0              | 0           |
| jiazi       | cn      | Coastal Fujian - Zeijang                           | 1                 | 116.0670540 | 22.8779140 | 130298     | 0                                                           | 0                   | 0             | 0              | 0           |
| jibuti      | dj      | Horn of Africa                                     | 0                 | 43.1480556  | 11.5950000 | 623891     | 0                                                           | 0                   | 0             | 0              | 0           |
| jiddah      | sa      | Southwestern Arabian Coast                         | 1                 | 39.2191670  | 21.5169440 | 2545728    | 0                                                           | 0                   | 0             | 0              | 0           |
| jieshi      | cn      | Coastal Fujian - Zeijang                           | 1                 | 115.8257420 | 22.8133770 | 137444     | 0                                                           | 0                   | 0             | 0              | 0           |
| jieshou     | cn      | Lower Yangtze                                      | 4                 | 115.3500000 | 33.2500000 | 141993     | 0                                                           | 0                   | 0             | 0              | 0           |
| jilin       | cn      | Songhua Jiang                                      | 0                 | 126.5602780 | 43.8508330 | 1881977    | 0                                                           | 0                   | 0             | 0              | 0           |

Table S2 Cities and freshwater reptiles

| City          | Country | Freshwater Ecoregions of the World (FEOW) Region | Regional richness | Longitude   | Latitude    | Population | # of freshwater reptile species within 50 km of city centre |                     |               |                |             |
|---------------|---------|--------------------------------------------------|-------------------|-------------|-------------|------------|-------------------------------------------------------------|---------------------|---------------|----------------|-------------|
|               |         |                                                  |                   |             |             |            | Lizard species                                              | Crocodilian species | Snake species | Turtle species | All species |
| jimeta        | ng      | Lower Niger - Benue                              | 2                 | 12.4666670  | 9.2833330   | 248166     | 0                                                           | 0                   | 0             | 0              | 0           |
| jimma         | et      | Lake Turkana                                     | 2                 | 36.8333330  | 7.6666670   | 128330     | 0                                                           | 0                   | 0             | 0              | 0           |
| jinan         | cn      | Lower Huang He                                   | 0                 | 116.9972220 | 36.6683330  | 2069266    | 0                                                           | 0                   | 0             | 0              | 0           |
| jinchang      | cn      | Inner Mongolia Endorheic Basins                  | 0                 | 102.1738890 | 38.4952780  | 144363     | 0                                                           | 0                   | 0             | 0              | 0           |
| jinchengjiang | cn      | Xi Yang                                          | 15                | 108.0333330 | 24.7000000  | 104138     | 0                                                           | 0                   | 0             | 0              | 0           |
| jind          | in      | Lower & Middle Indus                             | 2                 | 76.3166670  | 29.3166670  | 161271     | 0                                                           | 0                   | 0             | 0              | 0           |
| jingdezhen    | cn      | Lower Yangtze                                    | 4                 | 117.2078870 | 29.2947000  | 310565     | 0                                                           | 0                   | 0             | 0              | 0           |
| jinhua        | cn      | Lower Yangtze                                    | 4                 | 119.6547220 | 29.1077780  | 142206     | 0                                                           | 0                   | 0             | 1              | 1           |
| jining        | cn      | Lower Huang He                                   | 0                 | 113.1058330 | 41.0275000  | 258757     | 0                                                           | 0                   | 0             | 0              | 0           |
| jining        | cn      | Lower Yangtze                                    | 4                 | 116.5813890 | 35.4050000  | 450327     | 0                                                           | 0                   | 0             | 0              | 0           |
| jinxi         | cn      | Liao He                                          | 0                 | 120.8532700 | 40.7643170  | 313247     | 0                                                           | 0                   | 0             | 0              | 0           |
| jinzhou       | cn      | Liao He                                          | 0                 | 121.1416670 | 41.1077780  | 604269     | 0                                                           | 0                   | 0             | 0              | 0           |
| ji-parana     | br      | Madeira Brazilian Shield                         | 0                 | -61.9666670 | -10.8333330 | 100128     | 0                                                           | 0                   | 0             | 0              | 0           |
| jiroft        | ir      | Baluchistan                                      | 1                 | 57.7646000  | 28.6535000  | 111560     | 0                                                           | 0                   | 0             | 0              | 0           |
| jishou        | cn      | Lower Yangtze                                    | 4                 | 109.7166670 | 28.3166670  | 102332     | 0                                                           | 0                   | 0             | 0              | 0           |
| jishu         | cn      | Songhua Jiang                                    | 0                 | 126.8000000 | 44.3166670  | 103988     | 0                                                           | 0                   | 0             | 0              | 0           |
| jiujiang      | cn      | Lower Yangtze                                    | 4                 | 115.8872050 | 29.6079400  | 258807     | 0                                                           | 0                   | 0             | 0              | 0           |
| jiupu         | cn      | Liao He                                          | 0                 | 122.9500000 | 41.0666670  | 123843     | 0                                                           | 0                   | 0             | 0              | 0           |
| jiutai        | cn      | Songhua Jiang                                    | 0                 | 125.8327780 | 44.1525000  | 175115     | 0                                                           | 0                   | 0             | 0              | 0           |
| jiutepec      | mx      | Rio Balsas                                       | 10                | -99.1833330 | 18.8666670  | 166340     | 0                                                           | 0                   | 0             | 4              | 4           |
| jixi          | cn      | Lower Amur                                       | 0                 | 130.9666670 | 45.3000000  | 403759     | 0                                                           | 0                   | 0             | 0              | 0           |
| joao pessoa   | br      | Northeastern Caatinga & Coastal Drainages        | 1                 | -34.8666670 | -7.1166670  | 650896     | 0                                                           | 0                   | 0             | 1              | 1           |
| jodhpur       | in      | Lower & Middle Indus                             | 2                 | 73.0300000  | 26.2866670  | 921540     | 0                                                           | 0                   | 0             | 0              | 0           |
| joetsu        | jp      | Honshu - Shikoku - Kyushu                        | 5                 | 138.2684420 | 37.1117490  | 136235     | 0                                                           | 0                   | 0             | 0              | 0           |
| johannesburg  | za      | Southern Temperate Highveld                      | 5                 | 28.0498150  | -26.2051710 | 2026466    | 0                                                           | 1                   | 1             | 1              | 3           |

Table S2 Cities and freshwater reptiles

| City              | Country | Freshwater Ecoregions of the World (FEOW) Region | Regional richness | Longitude    | Latitude    | Population | # of freshwater reptile species within 50 km of city centre |                     |               |                |             |
|-------------------|---------|--------------------------------------------------|-------------------|--------------|-------------|------------|-------------------------------------------------------------|---------------------|---------------|----------------|-------------|
|                   |         |                                                  |                   |              |             |            | Lizard species                                              | Crocodilian species | Snake species | Turtle species | All species |
| johor bahru       | my      | Malay Peninsula Eastern Slope                    | 12                | 103.7578000  | 1.4655000   | 802525     | 1                                                           | 1                   | 1             | 6              | 9           |
| joinville         | br      | Southeastern Mata Atlantica                      | 2                 | -48.8333330  | -26.3000000 | 461312     | 0                                                           | 0                   | 0             | 0              | 0           |
| joliet            | us      | Upper Mississippi                                | 20                | -88.0816667  | 41.5250000  | 134957     | 0                                                           | 0                   | 0             | 7              | 7           |
| jolo              | ph      | Mindanao                                         | 1                 | 121.0022220  | 6.0522220   | 102222     | 0                                                           | 0                   | 0             | 0              | 0           |
| jombang           | id      | Central & Eastern Java                           | 4                 | 112.2333330  | -7.5500000  | 126479     | 0                                                           | 0                   | 0             | 0              | 0           |
| jos               | ng      | Lake Chad                                        | 0                 | 8.9000000    | 9.9166670   | 816876     | 1                                                           | 0                   | 0             | 0              | 1           |
| juarez            | mx      | Upper Rio Grande - Bravo                         | 8                 | -106.4833330 | 31.7333330  | 1403025    | 0                                                           | 0                   | 0             | 2              | 2           |
| juazeiro          | br      | S. Francisco                                     | 0                 | -40.5000000  | -9.5000000  | 137807     | 0                                                           | 0                   | 0             | 0              | 0           |
| juazeiro do norte | br      | Northeastern Caatinga & Coastal Drainages        | 1                 | -39.3333330  | -7.2000000  | 225234     | 0                                                           | 0                   | 0             | 0              | 0           |
| juba              | sd      | Upper Nile                                       | 2                 | 31.6166667   | 4.8500000   | 163455     | 1                                                           | 0                   | 0             | 0              | 1           |
| juiz de fora      | br      | Paraiba do Sul                                   | 0                 | -43.3527780  | -21.7516670 | 470201     | 0                                                           | 0                   | 0             | 0              | 0           |
| jujuy             | ar      | Chaco                                            | 3                 | -65.2971160  | -24.1945650 | 277150     | 0                                                           | 0                   | 0             | 0              | 0           |
| juliaca           | pe      | Titicaca                                         | 0                 | -70.1333333  | -15.5000000 | 247949     | 0                                                           | 0                   | 0             | 0              | 0           |
| junagadh          | in      | Lower & Middle Indus                             | 2                 | 70.4666670   | 21.5166670  | 184459     | 0                                                           | 1                   | 0             | 2              | 3           |
| jundiai           | br      | Upper Parana                                     | 3                 | -46.8666670  | -23.1833330 | 321595     | 0                                                           | 0                   | 0             | 1              | 1           |
| kabankalan        | ph      | Northern Philippine Islands                      | 1                 | 122.8142000  | 9.9902000   | 138314     | 0                                                           | 0                   | 0             | 0              | 0           |
| kabul             | af      | Indus Himalayan Foothills                        | 0                 | 69.1833330   | 34.5166670  | 3043589    | 0                                                           | 0                   | 0             | 0              | 0           |
| kabwe             | zm      | Middle Zambezi - Luangwa                         | 3                 | 28.4500000   | -14.4333333 | 189006     | 0                                                           | 0                   | 0             | 0              | 0           |
| kadoma            | jp      | Honshu - Shikoku - Kyushu                        | 5                 | 135.5833330  | 34.7333330  | 131729     | 0                                                           | 0                   | 0             | 2              | 2           |
| kadoma            | zw      | Zambeian Highveld                                | 3                 | 29.9166667   | -18.3500000 | 100276     | 0                                                           | 0                   | 0             | 2              | 2           |
| kaduna            | ng      | Lower Niger - Benue                              | 2                 | 7.4382800    | 10.5222390  | 1582211    | 0                                                           | 0                   | 0             | 0              | 0           |
| kahramanmaras     | tr      | Southern Anatolia                                | 2                 | 36.9264050   | 37.5847050  | 376247     | 0                                                           | 0                   | 0             | 0              | 0           |
| kaifeng           | cn      | Lower Yangtze                                    | 4                 | 114.4186110  | 34.7441670  | 576915     | 0                                                           | 0                   | 0             | 0              | 0           |
| kaili             | cn      | Lower Yangtze                                    | 4                 | 107.5833330  | 26.5000000  | 151956     | 0                                                           | 0                   | 0             | 0              | 0           |
| kaithal           | in      | Lower & Middle Indus                             | 2                 | 76.3833330   | 29.8000000  | 140614     | 0                                                           | 0                   | 0             | 0              | 0           |

Table S2 Cities and freshwater reptiles

| City             | Country | Freshwater Ecoregions of the World (FEOW) Region | Regional richness | Longitude   | Latitude   | Population | # of freshwater reptile species within 50 km of city centre |                     |               |                |             |
|------------------|---------|--------------------------------------------------|-------------------|-------------|------------|------------|-------------------------------------------------------------|---------------------|---------------|----------------|-------------|
|                  |         |                                                  |                   |             |            |            | Lizard species                                              | Crocodilian species | Snake species | Turtle species | All species |
| kaiyuan          | cn      | Xi Yang                                          | 15                | 103.3037230 | 23.6976680 | 198423     | 0                                                           | 0                   | 0             | 0              | 0           |
| kakamigahara     | jp      | Honshu - Shikoku - Kyushu                        | 5                 | 136.8666670 | 35.4166670 | 132243     | 0                                                           | 0                   | 0             | 0              | 0           |
| kakinada         | in      | Northern Deccan Plateau                          | 2                 | 82.2166670  | 16.9333330 | 292956     | 0                                                           | 0                   | 0             | 0              | 0           |
| kakogawa         | jp      | Honshu - Shikoku - Kyushu                        | 5                 | 134.8500000 | 34.7666670 | 271636     | 0                                                           | 0                   | 0             | 1              | 1           |
| kalemie          | cd      | Albertine Highlands                              | 0                 | 29.2000000  | -5.9333330 | 147065     | 0                                                           | 0                   | 0             | 0              | 0           |
| kaliningrad      | ru      | Central & Western Europe                         | 13                | 20.5109510  | 54.7064930 | 434959     | 0                                                           | 0                   | 0             | 0              | 0           |
| kalisz           | pl      | Central & Western Europe                         | 13                | 18.0910180  | 51.7610900 | 108759     | 0                                                           | 0                   | 0             | 1              | 1           |
| kallithea        | gr      | Aegean Drainages                                 | 3                 | 23.7000000  | 37.9500000 | 107767     | 0                                                           | 0                   | 0             | 2              | 2           |
| kalmunai         | lk      | Sri Lanka Dry Zone                               | 5                 | 81.8166667  | 7.4166667  | 100172     | 0                                                           | 0                   | 0             | 0              | 0           |
| kalol            | in      | Namuda - Tapi                                    | 1                 | 72.4833330  | 23.2500000 | 106958     | 0                                                           | 0                   | 0             | 0              | 0           |
| kaluga           | ru      | Volga - Ural                                     | 0                 | 36.2754150  | 54.5293020 | 338982     | 0                                                           | 0                   | 0             | 0              | 0           |
| kalyan           | in      | Western Ghats                                    | 4                 | 73.1500000  | 19.2500000 | 1262355    | 0                                                           | 0                   | 0             | 0              | 0           |
| kamagaya         | jp      | Honshu - Shikoku - Kyushu                        | 5                 | 140.0217920 | 35.8030410 | 106288     | 0                                                           | 0                   | 0             | 3              | 3           |
| kamakura         | jp      | Honshu - Shikoku - Kyushu                        | 5                 | 139.5502780 | 35.3088890 | 166019     | 0                                                           | 0                   | 0             | 3              | 3           |
| kamalia          | pk      | Lower & Middle Indus                             | 2                 | 72.6500000  | 30.7333330 | 112459     | 0                                                           | 0                   | 0             | 0              | 0           |
| kamarhati        | in      | Ganges Delta & Plain                             | 13                | 88.3747220  | 22.6711110 | 332997     | 1                                                           | 0                   | 0             | 0              | 1           |
| kamensk-uralskiy | ru      | Ob                                               | 0                 | 61.9329000  | 56.4185000 | 181884     | 0                                                           | 0                   | 0             | 0              | 0           |
| kamoke           | pk      | Lower & Middle Indus                             | 2                 | 74.2244440  | 31.9744440 | 199589     | 0                                                           | 0                   | 0             | 0              | 0           |
| kampala          | ug      | Lake Victoria Basin                              | 5                 | 32.5655556  | 0.3155556  | 1353236    | 1                                                           | 0                   | 0             | 0              | 1           |
| kamyshin         | ru      | Volga - Ural                                     | 0                 | 45.4160130  | 50.0983310 | 128628     | 0                                                           | 0                   | 0             | 0              | 0           |
| kananga          | cd      | Kasai                                            | 1                 | 22.4177780  | -5.8958330 | 463556     | 0                                                           | 0                   | 0             | 0              | 0           |
| kanchipuram      | in      | Southeastern Ghats                               | 3                 | 79.7166670  | 12.8333330 | 155043     | 0                                                           | 0                   | 0             | 0              | 0           |
| kanchrapara      | in      | Ganges Delta & Plain                             | 13                | 88.4319440  | 22.9700000 | 136967     | 0                                                           | 0                   | 0             | 0              | 0           |
| kandi            | bj      | Lower Niger - Benue                              | 2                 | 2.9386111   | 11.1341667 | 109705     | 0                                                           | 3                   | 1             | 0              | 4           |
| kandy            | lk      | Sri Lanka Wet Zone                               | 3                 | 80.6350000  | 7.2963889  | 111720     | 1                                                           | 0                   | 0             | 0              | 1           |

Table S2 Cities and freshwater reptiles

| City          | Country | Freshwater Ecoregions of the World (FEOW) Region | Regional richness | Longitude   | Latitude   | Population | # of freshwater reptile species within 50 km of city centre |                     |               |                |             |
|---------------|---------|--------------------------------------------------|-------------------|-------------|------------|------------|-------------------------------------------------------------|---------------------|---------------|----------------|-------------|
|               |         |                                                  |                   |             |            |            | Lizard species                                              | Crocodilian species | Snake species | Turtle species | All species |
| kankan        | gn      | Upper Niger                                      | 0                 | -9.3000000  | 10.3833333 | 114103     | 0                                                           | 0                   | 0             | 0              | 0           |
| kano          | ng      | Lake Chad                                        | 0                 | 8.5138070   | 11.9943540 | 3626204    | 0                                                           | 0                   | 0             | 0              | 0           |
| kanpur        | in      | Ganges Delta & Plain                             | 13                | 80.3500000  | 26.4666670 | 2823523    | 0                                                           | 0                   | 0             | 0              | 0           |
| kansas city   | us      | Middle Missouri                                  | 12                | -94.6272222 | 39.1141667 | 442028     | 0                                                           | 0                   | 0             | 6              | 6           |
| kansas city   | us      | Middle Missouri                                  | 12                | -94.5783333 | 39.0997222 | 442028     | 0                                                           | 0                   | 0             | 6              | 6           |
| kansk         | ru      | Yenisei                                          | 0                 | 95.7175000  | 56.2016670 | 101503     | 0                                                           | 0                   | 0             | 0              | 0           |
| kaohsiung     | tw      | Western Taiwan                                   | 2                 | 120.3013889 | 22.6177778 | 1512832    | 0                                                           | 0                   | 0             | 1              | 1           |
| kaohsiung     | tw      | Western Taiwan                                   | 2                 | 120.3500000 | 22.6333333 | 1512832    | 0                                                           | 0                   | 0             | 1              | 1           |
| kaolack       | sn      | Senegal - Gambia                                 | 4                 | -16.0666667 | 14.1500000 | 289633     | 0                                                           | 0                   | 0             | 0              | 0           |
| kapra         | in      | Southern Deccan Plateau                          | 0                 | 78.5661110  | 17.4866670 | 198349     | 0                                                           | 0                   | 0             | 0              | 0           |
| karachi       | pk      | Lower & Middle Indus                             | 2                 | 67.0822000  | 24.9056000 | 11627378   | 0                                                           | 0                   | 0             | 0              | 0           |
| karaj         | ir      | Namak                                            | 3                 | 51.0103000  | 35.8355000 | 1448996    | 0                                                           | 0                   | 0             | 3              | 3           |
| karaman       | tr      | Central Anatolia                                 | 2                 | 33.2150000  | 37.1811110 | 120464     | 0                                                           | 0                   | 0             | 0              | 0           |
| karamay       | cn      | Dzungaria                                        | 0                 | 84.8601420  | 45.6003760 | 174828     | 0                                                           | 0                   | 0             | 0              | 0           |
| karang tengah | id      | Indian Ocean Slope of Sumatra & Java             | 9                 | 106.9105560 | -6.9086110 | 138471     | 1                                                           | 0                   | 0             | 0              | 1           |
| karawang      | id      | Southern Sumatra - Western Java                  | 8                 | 107.3055560 | -6.3033330 | 198894     | 0                                                           | 1                   | 0             | 0              | 1           |
| karimnagar    | in      | Northern Deccan Plateau                          | 2                 | 79.1500000  | 18.4333330 | 228770     | 0                                                           | 0                   | 0             | 0              | 0           |
| kariya        | jp      | Honshu - Shikoku - Kyushu                        | 5                 | 136.9833330 | 34.9833330 | 139160     | 0                                                           | 0                   | 0             | 2              | 2           |
| karlsruhe     | de      | Central & Western Europe                         | 13                | 8.3858330   | 49.0047220 | 284786     | 0                                                           | 0                   | 0             | 3              | 3           |
| karnal        | in      | Ganges Delta & Plain                             | 13                | 76.9833330  | 29.6833330 | 225064     | 0                                                           | 0                   | 0             | 0              | 0           |
| kashan        | ir      | Namak                                            | 3                 | 51.4773000  | 33.9888000 | 301107     | 0                                                           | 0                   | 0             | 0              | 0           |
| kashi         | cn      | Tarim                                            | 0                 | 75.9797220  | 39.4547220 | 274717     | 0                                                           | 0                   | 0             | 0              | 0           |
| kashihara     | jp      | Honshu - Shikoku - Kyushu                        | 5                 | 135.7666670 | 34.4500000 | 126224     | 0                                                           | 0                   | 0             | 1              | 1           |
| kashipur      | in      | Ganges Delta & Plain                             | 13                | 78.9500000  | 29.2166670 | 103149     | 0                                                           | 2                   | 0             | 1              | 3           |
| kashiwa       | jp      | Honshu - Shikoku - Kyushu                        | 5                 | 139.9688890 | 35.8544440 | 340228     | 0                                                           | 0                   | 0             | 3              | 3           |

Table S2 Cities and freshwater reptiles

| City       | Country | Freshwater Ecoregions of the World (FEOW) Region | Regional richness | Longitude    | Latitude   | Population | # of freshwater reptile species within 50 km of city centre |                     |               |                |             |
|------------|---------|--------------------------------------------------|-------------------|--------------|------------|------------|-------------------------------------------------------------|---------------------|---------------|----------------|-------------|
|            |         |                                                  |                   |              |            |            | Lizard species                                              | Crocodilian species | Snake species | Turtle species | All species |
| kassala    | sd      | Lower Nile                                       | 1                 | 36.3988889   | 15.4558333 | 401514     | 0                                                           | 0                   | 0             | 0              | 0           |
| kassel     | de      | Central & Western Europe                         | 13                | 9.5000000    | 51.3166670 | 193117     | 0                                                           | 0                   | 0             | 4              | 4           |
| kasuga     | jp      | Honshu - Shikoku - Kyushu                        | 5                 | 130.4870320  | 33.5261110 | 112300     | 0                                                           | 0                   | 0             | 0              | 0           |
| kasugai    | jp      | Honshu - Shikoku - Kyushu                        | 5                 | 136.9833330  | 35.2333330 | 298591     | 0                                                           | 0                   | 0             | 2              | 2           |
| kasukabe   | jp      | Honshu - Shikoku - Kyushu                        | 5                 | 139.7536110  | 35.9763890 | 206919     | 0                                                           | 0                   | 0             | 3              | 3           |
| kasur      | pk      | Lower & Middle Indus                             | 2                 | 74.4466670   | 31.1155560 | 290728     | 0                                                           | 0                   | 0             | 0              | 0           |
| kathmandu  | np      | Ganges Himalayan Foothills                       | 3                 | 85.3166667   | 27.7166667 | 790612     | 0                                                           | 0                   | 0             | 0              | 0           |
| katihar    | in      | Ganges Delta & Plain                             | 13                | 87.5833330   | 25.5333330 | 192575     | 0                                                           | 0                   | 0             | 0              | 0           |
| katowice   | pl      | Central & Western Europe                         | 13                | 19.0275450   | 50.2584150 | 317316     | 0                                                           | 0                   | 0             | 1              | 1           |
| katsina    | ng      | Lower Niger - Benue                              | 2                 | 7.6006280    | 12.9894280 | 432179     | 0                                                           | 0                   | 0             | 0              | 0           |
| katumba    | tz      | Lake Malawi                                      | 5                 | 33.6166667   | -9.2333333 | 108558     | 0                                                           | 0                   | 0             | 0              | 0           |
| kaunas     | lt      | Central & Western Europe                         | 13                | 23.9000000   | 54.9000000 | 374655     | 0                                                           | 0                   | 0             | 0              | 0           |
| kawagoe    | jp      | Honshu - Shikoku - Kyushu                        | 5                 | 139.4852780  | 35.9086110 | 337937     | 0                                                           | 0                   | 0             | 3              | 3           |
| kawaguchi  | jp      | Honshu - Shikoku - Kyushu                        | 5                 | 139.7205560  | 35.8050000 | 468574     | 0                                                           | 0                   | 0             | 3              | 3           |
| kawanishi  | jp      | Honshu - Shikoku - Kyushu                        | 5                 | 135.4166670  | 34.8166670 | 160522     | 0                                                           | 0                   | 0             | 2              | 2           |
| kawasaki   | jp      | Honshu - Shikoku - Kyushu                        | 5                 | 139.7172220  | 35.5205560 | 1306804    | 0                                                           | 0                   | 0             | 3              | 3           |
| kayseri    | tr      | Northern Anatolia                                | 2                 | 35.4852780   | 38.7322220 | 593164     | 0                                                           | 0                   | 0             | 0              | 0           |
| kazan      | ru      | Volga - Ural                                     | 0                 | 49.1221440   | 55.7887400 | 1104750    | 0                                                           | 0                   | 0             | 0              | 0           |
| kebumen    | id      | Indian Ocean Slope of Sumatra & Java             | 9                 | 109.6008330  | -7.3233330 | 144457     | 0                                                           | 0                   | 0             | 0              | 0           |
| kecskemet  | hu      | Dniester - Lower Danube                          | 3                 | 19.7833330   | 46.9000000 | 106062     | 0                                                           | 0                   | 0             | 0              | 0           |
| kediri     | id      | Central & Eastern Java                           | 4                 | 112.0166670  | -7.8166670 | 235171     | 0                                                           | 0                   | 0             | 0              | 0           |
| kedungwuni | id      | Central & Eastern Java                           | 4                 | 109.6479420  | -6.9703830 | 117262     | 0                                                           | 0                   | 0             | 0              | 0           |
| keelung    | tw      | Western Taiwan                                   | 2                 | 121.7375000  | 25.1313889 | 397516     | 0                                                           | 0                   | 0             | 2              | 2           |
| kelowna    | ca      | Columbia Glaciated                               | 2                 | -119.4833330 | 49.9000000 | 125110     | 0                                                           | 0                   | 0             | 1              | 1           |

Table S2 Cities and freshwater reptiles

| City          | Country | Freshwater Ecoregions of the World (FEOW) Region | Regional richness | Longitude   | Latitude   | Population | # of freshwater reptile species within 50 km of city centre |                     |               |                |             |
|---------------|---------|--------------------------------------------------|-------------------|-------------|------------|------------|-------------------------------------------------------------|---------------------|---------------|----------------|-------------|
|               |         |                                                  |                   |             |            |            | Lizard species                                              | Crocodilian species | Snake species | Turtle species | All species |
| kemang        | id      | Southern Sumatra - Western Java                  | 8                 | 107.0191670 | -6.7413890 | 111027     | 1                                                           | 0                   | 1             | 0              | 2           |
| kemerovo      | ru      | Ob                                               | 0                 | 86.0833330  | 55.3333330 | 477096     | 0                                                           | 0                   | 0             | 0              | 0           |
| kendari       | id      | Sulawesi                                         | 2                 | 122.4988890 | -3.9450000 | 235329     | 0                                                           | 0                   | 0             | 0              | 0           |
| kenitra       | ma      | Atlantic Northwest Africa                        | 3                 | -6.5802030  | 34.2610080 | 420534     | 0                                                           | 0                   | 0             | 1              | 1           |
| kerch         | ua      | Crimea Peninsula                                 | 0                 | 36.4705970  | 45.3606960 | 152194     | 0                                                           | 0                   | 0             | 0              | 0           |
| kerman        | ir      | Kavir & Lut Deserts                              | 0                 | 57.0787900  | 30.2832090 | 577547     | 0                                                           | 0                   | 0             | 0              | 0           |
| kermanshah    | ir      | Upper Tigris & Euphrates                         | 3                 | 47.0650000  | 34.3141670 | 766742     | 0                                                           | 0                   | 0             | 0              | 0           |
| khabarovsk    | ru      | Lower Amur                                       | 0                 | 135.0927780 | 48.4808330 | 578307     | 0                                                           | 0                   | 0             | 0              | 0           |
| khairpur      | pk      | Lower & Middle Indus                             | 2                 | 68.7616980  | 27.5294830 | 124650     | 0                                                           | 0                   | 0             | 0              | 0           |
| khammam       | in      | Southern Deccan Plateau                          | 0                 | 80.1500000  | 17.2500000 | 170522     | 0                                                           | 0                   | 0             | 0              | 0           |
| khandwa       | in      | Namuda - Tapi                                    | 1                 | 76.3333330  | 21.8333330 | 182860     | 0                                                           | 0                   | 0             | 0              | 0           |
| khanewal      | pk      | Lower & Middle Indus                             | 2                 | 71.9333330  | 30.3000000 | 154407     | 0                                                           | 0                   | 0             | 0              | 0           |
| khanna        | in      | Lower & Middle Indus                             | 2                 | 76.2230560  | 30.7044440 | 117146     | 0                                                           | 0                   | 0             | 0              | 0           |
| khanpur       | pk      | Lower & Middle Indus                             | 2                 | 70.6567020  | 28.6453380 | 142468     | 0                                                           | 0                   | 0             | 0              | 0           |
| kharagpur     | in      | Ganges Delta & Plain                             | 13                | 87.3333330  | 22.3333330 | 219686     | 0                                                           | 0                   | 0             | 0              | 0           |
| khardaha      | in      | Ganges Delta & Plain                             | 13                | 88.3780560  | 22.7186110 | 128358     | 1                                                           | 0                   | 0             | 0              | 1           |
| khartoum      | sd      | Lower Nile                                       | 1                 | 32.5341667  | 15.5880556 | 1974780    | 0                                                           | 0                   | 0             | 0              | 0           |
| kherson       | ua      | Dnieper - South Bug                              | 2                 | 32.6178000  | 46.6558140 | 320476     | 0                                                           | 0                   | 0             | 0              | 0           |
| khimki        | ru      | Volga - Ural                                     | 0                 | 37.4296870  | 55.8970370 | 142620     | 0                                                           | 0                   | 0             | 0              | 0           |
| khlong luang  | th      | Chao Phraya                                      | 12                | 100.6457780 | 14.0646670 | 118551     | 1                                                           | 0                   | 0             | 7              | 8           |
| khomeynishahr | ir      | Esfahan                                          | 0                 | 51.5211340  | 32.7001750 | 277355     | 0                                                           | 0                   | 0             | 0              | 0           |
| khon kaen     | th      | Khorat Plateau (Mekong)                          | 5                 | 102.8329990 | 16.4467110 | 147579     | 0                                                           | 0                   | 0             | 0              | 0           |
| khorrarnabad  | ir      | Upper Tigris & Euphrates                         | 3                 | 48.3558330  | 33.4877780 | 329847     | 0                                                           | 0                   | 0             | 0              | 0           |
| khorrarnshahr | ir      | Lower Tigris & Euphrates                         | 1                 | 48.1664000  | 30.4397000 | 331254     | 0                                                           | 0                   | 0             | 1              | 1           |
| khoy          | ir      | Kura - South Caspian Drainages                   | 4                 | 44.9521000  | 38.5503000 | 175386     | 0                                                           | 0                   | 0             | 0              | 0           |

Table S2 Cities and freshwater reptiles

| City               | Country | Freshwater Ecoregions of the World (FEOW) Region | Regional richness | Longitude   | Latitude    | Population | # of freshwater reptile species within 50 km of city centre |                     |               |                |             |
|--------------------|---------|--------------------------------------------------|-------------------|-------------|-------------|------------|-------------------------------------------------------------|---------------------|---------------|----------------|-------------|
|                    |         |                                                  |                   |             |             |            | Lizard species                                              | Crocodilian species | Snake species | Turtle species | All species |
| khujand            | tj      | Northern Central Asian Highlands                 | 1                 | 69.6316667  | 40.2800000  | 144874     | 0                                                           | 0                   | 0             | 0              | 0           |
| khulna             | bd      | Ganges Delta & Plain                             | 13                | 89.5500000  | 22.8000000  | 1342429    | 0                                                           | 1                   | 0             | 0              | 1           |
| khurja             | in      | Ganges Delta & Plain                             | 13                | 77.8500000  | 28.2500000  | 105920     | 0                                                           | 0                   | 0             | 0              | 0           |
| khushab            | pk      | Lower & Middle Indus                             | 2                 | 72.3525000  | 32.2966670  | 102823     | 0                                                           | 0                   | 0             | 0              | 0           |
| khuzdar            | pk      | Lower & Middle Indus                             | 2                 | 66.6433650  | 27.7383850  | 141286     | 0                                                           | 0                   | 0             | 0              | 0           |
| kiel               | de      | Central & Western Europe                         | 13                | 10.1333330  | 54.3333330  | 235264     | 0                                                           | 0                   | 0             | 1              | 1           |
| kielce             | pl      | Central & Western Europe                         | 13                | 20.6666670  | 50.8333330  | 208598     | 0                                                           | 0                   | 0             | 1              | 1           |
| kiev               | ua      | Dnieper - South Bug                              | 2                 | 30.5166670  | 50.4333330  | 2514227    | 0                                                           | 0                   | 0             | 0              | 0           |
| kigali             | rw      | Lake Victoria Basin                              | 5                 | 30.0605556  | -1.9536111  | 745526     | 0                                                           | 0                   | 1             | 0              | 1           |
| kigoma             | tz      | Lake Tanganyika                                  | 3                 | 29.6266667  | -4.8769444  | 164261     | 1                                                           | 0                   | 0             | 0              | 1           |
| kikwit             | cd      | Kasai                                            | 1                 | 18.8180560  | -5.0386110  | 186995     | 0                                                           | 0                   | 0             | 0              | 0           |
| killeen            | us      | East Texas Gulf                                  | 34                | -97.7275000 | 31.1169444  | 103009     | 0                                                           | 0                   | 1             | 4              | 5           |
| kimberley          | za      | Southern Temperate Highveld                      | 5                 | 24.7623150  | -28.7322620 | 142105     | 1                                                           | 0                   | 0             | 0              | 1           |
| kindia             | gn      | Northern Upper Guinea                            | 3                 | -12.8500000 | 10.0666667  | 117095     | 1                                                           | 0                   | 0             | 0              | 1           |
| kindu              | cd      | Upper Congo                                      | 0                 | 25.9500000  | -2.9500000  | 135690     | 0                                                           | 0                   | 0             | 0              | 0           |
| kingston           | jm      | Jamaica                                          | 2                 | -76.8000000 | 18.0000000  | 583999     | 0                                                           | 0                   | 0             | 5              | 5           |
| kingston           | ca      | Laurentian Great Lakes                           | 16                | -76.4833330 | 44.2333330  | 114243     | 0                                                           | 0                   | 0             | 5              | 5           |
| kingston upon hull | gb      | Central & Western Europe                         | 13                | -0.3333330  | 53.7166670  | 302297     | 0                                                           | 0                   | 0             | 0              | 0           |
| kinshasa           | cd      | Lower Congo Rapids                               | 0                 | 15.3000000  | -4.3000000  | 7787832    | 0                                                           | 0                   | 0             | 0              | 0           |
| kirkuk             | iq      | Upper Tigris & Euphrates                         | 3                 | 44.3922222  | 35.4680556  | 601442     | 0                                                           | 0                   | 0             | 0              | 0           |
| kirov              | ru      | Volga - Ural                                     | 0                 | 49.6600680  | 58.5966540  | 457387     | 0                                                           | 0                   | 0             | 0              | 0           |
| kirovohrad         | ua      | Dnieper - South Bug                              | 2                 | 32.2597020  | 48.5131990  | 249453     | 0                                                           | 0                   | 0             | 0              | 0           |
| kiryu              | jp      | Honshu - Shikoku - Kyushu                        | 5                 | 139.3333330 | 36.4000000  | 110221     | 0                                                           | 0                   | 0             | 0              | 0           |
| kisangani          | cd      | Upper Congo Rapids                               | 0                 | 25.2000000  | 0.5166670   | 539164     | 0                                                           | 0                   | 0             | 0              | 0           |
| kisaran            | id      | Northern Central Sumatra - Western Malaysia      | 7                 | 99.6158000  | 2.9845000   | 129928     | 0                                                           | 0                   | 0             | 0              | 0           |

Table S2 Cities and freshwater reptiles

| City       | Country | Freshwater Ecoregions of the World (FEOW) Region | Regional richness | Longitude   | Latitude    | Population | # of freshwater reptile species within 50 km of city centre |                     |               |                |             |
|------------|---------|--------------------------------------------------|-------------------|-------------|-------------|------------|-------------------------------------------------------------|---------------------|---------------|----------------|-------------|
|            |         |                                                  |                   |             |             |            | Lizard species                                              | Crocodilian species | Snake species | Turtle species | All species |
| kisarazu   | jp      | Honshu - Shikoku - Kyushu                        | 5                 | 139.9225000 | 35.3747220  | 122527     | 0                                                           | 0                   | 0             | 3              | 3           |
| kishi      | ng      | Lower Niger - Benue                              | 2                 | 3.8500000   | 9.0833330   | 155520     | 0                                                           | 0                   | 0             | 0              | 0           |
| kishiwada  | jp      | Honshu - Shikoku - Kyushu                        | 5                 | 135.3666670 | 34.4666670  | 205563     | 0                                                           | 0                   | 0             | 1              | 1           |
| kislovodsk | ru      | Western Caspian Drainages                        | 0                 | 42.7208330  | 43.9133330  | 132773     | 0                                                           | 0                   | 0             | 0              | 0           |
| kismayo    | so      | Shebelle - Juba                                  | 0                 | 42.5333333  | -0.3666667  | 234884     | 0                                                           | 0                   | 0             | 0              | 0           |
| kisumu     | ke      | Lake Victoria Basin                              | 5                 | 34.7500000  | -0.1000000  | 216479     | 0                                                           | 0                   | 1             | 0              | 1           |
| kitakyushu | jp      | Honshu - Shikoku - Kyushu                        | 5                 | 130.8333330 | 33.8333330  | 997545     | 0                                                           | 0                   | 0             | 0              | 0           |
| kitami     | jp      | Sakhalin, Hokkaido, & Sikhote - Alin Coast       | 0                 | 143.8908330 | 43.8030560  | 113138     | 0                                                           | 0                   | 0             | 0              | 0           |
| kitchener  | ca      | Laurentian Great Lakes                           | 16                | -80.5000000 | 43.4500000  | 409111     | 0                                                           | 0                   | 0             | 5              | 5           |
| kitwe      | zm      | Zambeian Headwaters                              | 1                 | 28.2000000  | -12.8166667 | 400955     | 0                                                           | 0                   | 0             | 0              | 0           |
| klaipeda   | lt      | Southern Baltic Lowlands                         | 0                 | 21.1175000  | 55.7172222  | 192314     | 0                                                           | 0                   | 0             | 0              | 0           |
| klang      | my      | Northern Central Sumatra - Western Malaysia      | 7                 | 101.4500000 | 3.0333330   | 879887     | 1                                                           | 0                   | 0             | 1              | 2           |
| klaten     | id      | Central & Eastern Java                           | 4                 | 110.6063890 | -7.7058330  | 126845     | 0                                                           | 0                   | 0             | 0              | 0           |
| klerksdorp | za      | Southern Temperate Highveld                      | 5                 | 26.6667190  | -26.8521280 | 178928     | 0                                                           | 0                   | 0             | 1              | 1           |
| kluang     | my      | Malay Peninsula Eastern Slope                    | 12                | 103.3328000 | 2.0251000   | 169838     | 0                                                           | 0                   | 0             | 0              | 0           |
| knoxville  | us      | Tennessee                                        | 17                | -83.9208333 | 35.9605556  | 172474     | 0                                                           | 0                   | 0             | 2              | 2           |
| kobe       | jp      | Honshu - Shikoku - Kyushu                        | 5                 | 135.1829950 | 34.6913040  | 1528487    | 0                                                           | 0                   | 0             | 1              | 1           |
| koblenz    | de      | Central & Western Europe                         | 13                | 7.6000000   | 50.3500000  | 108146     | 0                                                           | 0                   | 0             | 1              | 1           |
| kochi      | in      | Western Ghats                                    | 4                 | 76.2333330  | 9.9666670   | 604751     | 0                                                           | 0                   | 0             | 0              | 0           |
| kodaira    | jp      | Honshu - Shikoku - Kyushu                        | 5                 | 139.4838890 | 35.7263890  | 187369     | 0                                                           | 0                   | 0             | 3              | 3           |
| koganei    | jp      | Honshu - Shikoku - Kyushu                        | 5                 | 139.5011110 | 35.6913890  | 115968     | 0                                                           | 0                   | 0             | 3              | 3           |
| kohat      | pk      | Lower & Middle Indus                             | 2                 | 71.4492910  | 33.5819580  | 151488     | 0                                                           | 0                   | 0             | 0              | 0           |
| koidu      | sl      | Northern Upper Guinea                            | 3                 | -10.8333333 | 8.4166667   | 111090     | 0                                                           | 0                   | 0             | 0              | 0           |
| kokubunji  | jp      | Honshu - Shikoku - Kyushu                        | 5                 | 139.4755560 | 35.7022220  | 118682     | 0                                                           | 0                   | 0             | 3              | 3           |
| kolar      | in      | Southeastern Ghats                               | 3                 | 78.1333330  | 13.1333330  | 126452     | 0                                                           | 0                   | 0             | 0              | 0           |

Table S2 Cities and freshwater reptiles

| City                | Country | Freshwater Ecoregions of the World (FEOW) Region | Regional richness | Longitude   | Latitude   | Population | # of freshwater reptile species within 50 km of city centre |                     |               |                |             |
|---------------------|---------|--------------------------------------------------|-------------------|-------------|------------|------------|-------------------------------------------------------------|---------------------|---------------|----------------|-------------|
|                     |         |                                                  |                   |             |            |            | Lizard species                                              | Crocodilian species | Snake species | Turtle species | All species |
| kolhapur            | in      | Western Ghats                                    | 4                 | 74.2166670  | 16.7000000 | 516184     | 0                                                           | 0                   | 0             | 0              | 0           |
| kollam              | in      | Western Ghats                                    | 4                 | 76.5916670  | 8.8805560  | 394198     | 0                                                           | 0                   | 0             | 0              | 0           |
| kolomna             | ru      | Volga - Ural                                     | 0                 | 38.7783330  | 55.0794440 | 147692     | 0                                                           | 0                   | 0             | 0              | 0           |
| kolpino             | ru      | Southern Baltic Lowlands                         | 0                 | 30.5794440  | 59.7441670 | 136078     | 0                                                           | 0                   | 0             | 0              | 0           |
| komaki              | jp      | Honshu - Shikoku - Kyushu                        | 5                 | 136.9166670 | 35.2833330 | 151026     | 0                                                           | 0                   | 0             | 2              | 2           |
| komatsu             | jp      | Honshu - Shikoku - Kyushu                        | 5                 | 136.4500000 | 36.4000000 | 109047     | 0                                                           | 0                   | 0             | 0              | 0           |
| komsomolsk-na-amure | ru      | Lower Amur                                       | 0                 | 137.0152440 | 50.5519860 | 275168     | 0                                                           | 0                   | 0             | 0              | 0           |
| konan               | jp      | Honshu - Shikoku - Kyushu                        | 5                 | 136.8666670 | 35.3333330 | 100390     | 0                                                           | 0                   | 0             | 0              | 0           |
| konya               | tr      | Central Anatolia                                 | 2                 | 32.4846360  | 37.8713540 | 876004     | 0                                                           | 0                   | 0             | 0              | 0           |
| korba               | in      | Northern Deccan Plateau                          | 2                 | 82.6833330  | 22.3500000 | 419326     | 0                                                           | 0                   | 0             | 0              | 0           |
| korhogo             | ci      | Eburneo                                          | 0                 | -5.6296080  | 9.4580310  | 172114     | 0                                                           | 0                   | 0             | 0              | 0           |
| koriyama            | jp      | Honshu - Shikoku - Kyushu                        | 5                 | 140.3833330 | 37.4000000 | 340563     | 0                                                           | 0                   | 0             | 0              | 0           |
| korla               | cn      | Tarim                                            | 0                 | 86.1469440  | 41.7597220 | 179465     | 0                                                           | 0                   | 0             | 0              | 0           |
| koronadal           | ph      | Mindanao                                         | 1                 | 124.8469440 | 6.5030560  | 123765     | 0                                                           | 0                   | 0             | 0              | 0           |
| koshigaya           | jp      | Honshu - Shikoku - Kyushu                        | 5                 | 139.7833330 | 35.8833330 | 317443     | 0                                                           | 0                   | 0             | 3              | 3           |
| kosice              | sk      | Dniester - Lower Danube                          | 3                 | 21.2500000  | 48.7166667 | 236563     | 0                                                           | 0                   | 0             | 0              | 0           |
| kostroma            | ru      | Volga - Ural                                     | 0                 | 40.9268640  | 57.7664680 | 277658     | 0                                                           | 0                   | 0             | 0              | 0           |
| koszalin            | pl      | Central & Western Europe                         | 13                | 16.1849160  | 54.1935890 | 107450     | 0                                                           | 0                   | 0             | 1              | 1           |
| kot addu            | pk      | Lower & Middle Indus                             | 2                 | 70.9671410  | 30.4691970 | 104247     | 0                                                           | 0                   | 0             | 0              | 0           |
| kota                | in      | Ganges Delta & Plain                             | 13                | 75.8333330  | 25.1833330 | 763141     | 0                                                           | 0                   | 0             | 0              | 0           |
| kota bahru          | my      | Malay Peninsula Eastern Slope                    | 12                | 102.2386030 | 6.1332750  | 279343     | 0                                                           | 0                   | 0             | 0              | 0           |
| kota kinabalu       | my      | Northeastern Borneo                              | 7                 | 116.0724000 | 5.9749000  | 457375     | 1                                                           | 0                   | 0             | 0              | 1           |
| kotte               | lk      | Sri Lanka Wet Zone                               | 3                 | 79.9083333  | 6.9027778  | 118199     | 1                                                           | 0                   | 0             | 1              | 2           |
| kousseri            | cm      | Lake Chad                                        | 0                 | 15.0308333  | 12.0783333 | 435986     | 0                                                           | 0                   | 0             | 0              | 0           |
| kovrov              | ru      | Volga - Ural                                     | 0                 | 41.3191670  | 56.3572220 | 154226     | 0                                                           | 0                   | 0             | 0              | 0           |

Table S2 Cities and freshwater reptiles

| City             | Country | Freshwater Ecoregions of the World (FEOW) Region | Regional richness | Longitude   | Latitude    | Population | # of freshwater reptile species within 50 km of city centre |                     |               |                |             |
|------------------|---------|--------------------------------------------------|-------------------|-------------|-------------|------------|-------------------------------------------------------------|---------------------|---------------|----------------|-------------|
|                  |         |                                                  |                   |             |             |            | Lizard species                                              | Crocodilian species | Snake species | Turtle species | All species |
| kpallime         | tg      | Volta                                            | 7                 | 0.6333333   | 6.9000000   | 110541     | 0                                                           | 0                   | 0             | 0              | 0           |
| kragujevac       | rs      | Dniester - Lower Danube                          | 3                 | 20.9166670  | 44.0166670  | 149275     | 0                                                           | 0                   | 0             | 0              | 0           |
| krasnodar        | ru      | Kuban                                            | 0                 | 38.9725000  | 45.0488000  | 649860     | 0                                                           | 0                   | 0             | 0              | 0           |
| krasnoyarsk      | ru      | Yenisei                                          | 0                 | 92.8628000  | 56.0091000  | 907460     | 0                                                           | 0                   | 0             | 0              | 0           |
| krefeld          | de      | Central & Western Europe                         | 13                | 6.5666670   | 51.3333330  | 239908     | 0                                                           | 0                   | 0             | 5              | 5           |
| kremenchuk       | ua      | Dnieper - South Bug                              | 2                 | 33.4274820  | 49.0720050  | 232741     | 0                                                           | 0                   | 0             | 0              | 0           |
| kresek           | id      | Southern Sumatra - Western Java                  | 8                 | 106.3797220 | -6.1313890  | 110304     | 1                                                           | 0                   | 0             | 0              | 1           |
| krishnanagar     | in      | Ganges Delta & Plain                             | 13                | 88.5000000  | 23.4000000  | 145941     | 0                                                           | 0                   | 0             | 0              | 0           |
| kroonstad        | za      | Southern Temperate Highveld                      | 5                 | 27.2348790  | -27.6503600 | 103997     | 0                                                           | 0                   | 0             | 0              | 0           |
| krugersdorp      | za      | Southern Temperate Highveld                      | 5                 | 27.7907010  | -26.0928350 | 378833     | 0                                                           | 1                   | 1             | 1              | 3           |
| kryvyi rih       | ua      | Dnieper - South Bug                              | 2                 | 33.3804380  | 47.9096590  | 652376     | 0                                                           | 0                   | 0             | 0              | 0           |
| kuala lumpur     | my      | Northern Central Sumatra - Western Malaysia      | 7                 | 101.7000000 | 3.1666670   | 1453978    | 1                                                           | 0                   | 0             | 2              | 3           |
| kuala terengganu | my      | Malay Peninsula Eastern Slope                    | 12                | 103.1408000 | 5.3302000   | 285091     | 1                                                           | 0                   | 0             | 0              | 1           |
| kuantan          | my      | Malay Peninsula Eastern Slope                    | 12                | 103.3260000 | 3.8077000   | 366253     | 0                                                           | 0                   | 0             | 0              | 0           |
| kuching          | my      | Northwestern Borneo                              | 9                 | 110.3333330 | 1.5500000   | 570579     | 3                                                           | 1                   | 0             | 1              | 5           |
| kuhdasht         | ir      | Upper Tigris & Euphrates                         | 3                 | 47.6061000  | 33.5350000  | 100216     | 0                                                           | 0                   | 0             | 0              | 0           |
| kuito            | ao      | Zambeian Headwaters                              | 1                 | 16.9333330  | -12.3833330 | 113624     | 0                                                           | 0                   | 0             | 0              | 0           |
| kulim            | my      | Northern Central Sumatra - Western Malaysia      | 7                 | 100.5617730 | 5.3649910   | 170931     | 1                                                           | 0                   | 0             | 2              | 3           |
| kulti            | in      | Ganges Delta & Plain                             | 13                | 86.8500000  | 23.7333330  | 305434     | 0                                                           | 0                   | 0             | 0              | 0           |
| kumagaya         | jp      | Honshu - Shikoku - Kyushu                        | 5                 | 139.3833330 | 36.1333330  | 155816     | 0                                                           | 0                   | 0             | 2              | 2           |
| kumanovo         | mk      | Vardar                                           | 0                 | 21.7144444  | 42.1322222  | 108471     | 0                                                           | 0                   | 0             | 0              | 0           |
| kumasi           | gh      | Ashanti                                          | 1                 | -1.6166667  | 6.6833333   | 1468797    | 0                                                           | 0                   | 1             | 0              | 1           |
| kumba            | cm      | Western Equatorial Crater Lakes                  | 0                 | 9.4386111   | 4.6438889   | 144428     | 0                                                           | 0                   | 0             | 0              | 0           |
| kumbakonam       | in      | Southeastern Ghats                               | 3                 | 79.3833330  | 10.9666670  | 139276     | 0                                                           | 0                   | 0             | 0              | 0           |

Table S2 Cities and freshwater reptiles

| City      | Country | Freshwater Ecoregions of the World (FEOW) Region | Regional richness | Longitude    | Latitude    | Population | # of freshwater reptile species within 50 km of city centre |                     |               |                |             |
|-----------|---------|--------------------------------------------------|-------------------|--------------|-------------|------------|-------------------------------------------------------------|---------------------|---------------|----------------|-------------|
|           |         |                                                  |                   |              |             |            | Lizard species                                              | Crocodilian species | Snake species | Turtle species | All species |
| kunming   | cn      | Yunnan Lakes                                     | 0                 | 102.7183330  | 25.0388890  | 1023674    | 0                                                           | 0                   | 0             | 0              | 0           |
| kupang    | id      | Placemark                                        | #N/A              | 123.5833330  | -10.1666670 | 282421     | 0                                                           | 0                   | 0             | 0              | 0           |
| kurashiki | jp      | Honshu - Shikoku - Kyushu                        | 5                 | 133.7666670  | 34.5833330  | 437585     | 0                                                           | 0                   | 0             | 1              | 1           |
| kure      | jp      | Honshu - Shikoku - Kyushu                        | 5                 | 132.5666670  | 34.2333330  | 196626     | 0                                                           | 0                   | 0             | 1              | 1           |
| kurgan    | ru      | Ob                                               | 0                 | 65.3333330   | 55.4500000  | 343132     | 0                                                           | 0                   | 0             | 0              | 0           |
| kursk     | ru      | Dnieper - South Bug                              | 2                 | 36.1873490   | 51.7373290  | 409435     | 0                                                           | 0                   | 0             | 0              | 0           |
| kurume    | jp      | Honshu - Shikoku - Kyushu                        | 5                 | 130.5166670  | 33.3166670  | 238199     | 0                                                           | 0                   | 0             | 0              | 0           |
| kusatsu   | jp      | Biwa Ko                                          | 1                 | 135.9666670  | 35.0166670  | 127681     | 0                                                           | 0                   | 0             | 2              | 2           |
| kusti     | sd      | Upper Nile                                       | 2                 | 32.6666667   | 13.1666667  | 345102     | 0                                                           | 0                   | 0             | 0              | 0           |
| kutahya   | tr      | Northern Anatolia                                | 2                 | 29.9833330   | 39.4241670  | 185104     | 0                                                           | 0                   | 0             | 0              | 0           |
| kuwana    | jp      | Honshu - Shikoku - Kyushu                        | 5                 | 136.7000000  | 35.0666670  | 113108     | 0                                                           | 0                   | 0             | 2              | 2           |
| kuytun    | cn      | Dzungaria                                        | 0                 | 85.0000000   | 44.4166670  | 187242     | 0                                                           | 0                   | 0             | 0              | 0           |
| kwekwe    | zw      | Zambeian Highveld                                | 3                 | 29.8166667   | -18.9166667 | 116332     | 0                                                           | 0                   | 0             | 0              | 0           |
| kyzyl     | ru      | Yenisei                                          | 0                 | 94.4500000   | 51.7000000  | 108241     | 0                                                           | 0                   | 0             | 0              | 0           |
| la ceiba  | hn      | Mosquitia                                        | 3                 | -86.8000000  | 15.7833333  | 130230     | 1                                                           | 0                   | 0             | 0              | 1           |
| la paz    | bo      | Amazonas High Andes                              | 1                 | -68.1500000  | -16.5000000 | 812819     | 0                                                           | 0                   | 0             | 1              | 1           |
| la paz    | mx      | Southern California Coastal - Baja California    | 12                | -110.3000000 | 24.1666670  | 171490     | 0                                                           | 0                   | 0             | 1              | 1           |
| la plata  | ar      | Lower Parana                                     | 9                 | -57.9545330  | -34.9214540 | 684318     | 0                                                           | 0                   | 0             | 0              | 0           |
| la rioja  | ar      | Mar Chiquita - Salinas Grandes                   | 1                 | -66.8506680  | -29.4110480 | 178497     | 0                                                           | 0                   | 0             | 0              | 0           |
| la romana | do      | Hispaniola                                       | 5                 | -68.9666667  | 18.4166667  | 208439     | 0                                                           | 0                   | 0             | 0              | 0           |
| la serena | cl      | South Andean Pacific Slopes                      | 0                 | -71.2541670  | -29.9077780 | 154523     | 0                                                           | 0                   | 0             | 0              | 0           |
| la vega   | do      | Hispaniola                                       | 5                 | -70.5166667  | 19.2166667  | 102431     | 0                                                           | 0                   | 0             | 0              | 0           |
| lafayette | us      | Lower Mississippi                                | 33                | -92.0197222  | 30.2238889  | 112197     | 0                                                           | 1                   | 1             | 8              | 10          |
| lafia     | ng      | Lower Niger - Benue                              | 2                 | 8.5166670    | 8.4833330   | 127246     | 0                                                           | 0                   | 0             | 0              | 0           |
| lafiagi   | ng      | Lower Niger - Benue                              | 2                 | 5.4166670    | 8.8666670   | 102780     | 0                                                           | 0                   | 0             | 0              | 0           |

Table S2 Cities and freshwater reptiles

| City       | Country | Freshwater Ecoregions of the World (FEOW) Region | Regional richness | Longitude    | Latitude    | Population | # of freshwater reptile species within 50 km of city centre |                     |               |                |             |
|------------|---------|--------------------------------------------------|-------------------|--------------|-------------|------------|-------------------------------------------------------------|---------------------|---------------|----------------|-------------|
|            |         |                                                  |                   |              |             |            | Lizard species                                              | Crocodilian species | Snake species | Turtle species | All species |
| lages      | br      | Upper Uruguay                                    | 0                 | -50.3166670  | -27.8000000 | 164679     | 0                                                           | 0                   | 0             | 0              | 0           |
| lagos      | ng      | Bight Drainages                                  | 7                 | 3.3958330    | 6.4530560   | 8789133    | 0                                                           | 1                   | 0             | 0              | 1           |
| lahad datu | my      | Northeastern Borneo                              | 7                 | 118.3270000  | 5.0268000   | 105635     | 0                                                           | 1                   | 0             | 0              | 1           |
| lahore     | pk      | Lower & Middle Indus                             | 2                 | 74.3436110   | 31.5497220  | 6312576    | 0                                                           | 0                   | 0             | 0              | 0           |
| laiwu      | cn      | Lower Huang He                                   | 0                 | 117.6569440  | 36.1927780  | 124108     | 0                                                           | 0                   | 0             | 0              | 0           |
| laiyang    | cn      | Lower Huang He                                   | 0                 | 120.7136110  | 36.9758330  | 169594     | 0                                                           | 0                   | 0             | 0              | 0           |
| lakewood   | us      | Middle Missouri                                  | 12                | -105.0808333 | 39.7047222  | 140772     | 0                                                           | 0                   | 0             | 5              | 5           |
| lakhimpur  | in      | Ganges Delta & Plain                             | 13                | 80.7666670   | 27.9500000  | 140237     | 0                                                           | 0                   | 0             | 0              | 0           |
| lakhnau    | in      | Ganges Delta & Plain                             | 13                | 80.9166670   | 26.8500000  | 2472250    | 0                                                           | 0                   | 0             | 0              | 0           |
| lalitpur   | in      | Ganges Delta & Plain                             | 13                | 78.4166670   | 24.6833330  | 126487     | 0                                                           | 0                   | 0             | 0              | 0           |
| lalitpur   | np      | Ganges Himalayan Foothills                       | 3                 | 85.3333333   | 27.6666667  | 183316     | 0                                                           | 0                   | 0             | 0              | 0           |
| lambare    | py      | Chaco                                            | 3                 | -57.6500000  | -25.3500000 | 126391     | 0                                                           | 0                   | 0             | 0              | 0           |
| lampang    | th      | Chao Phraya                                      | 12                | 99.4927700   | 18.2923180  | 156139     | 0                                                           | 0                   | 0             | 0              | 0           |
| lancaster  | us      | Death Valley                                     | 5                 | -118.1358333 | 34.6980556  | 129548     | 0                                                           | 0                   | 0             | 2              | 2           |
| langfang   | cn      | Lower Huang He                                   | 0                 | 116.6947220  | 39.5097220  | 720119     | 0                                                           | 0                   | 0             | 0              | 0           |
| lansing    | us      | Laurentian Great Lakes                           | 16                | -84.5555556  | 42.7325000  | 117691     | 0                                                           | 0                   | 0             | 6              | 6           |
| lanzhou    | cn      | Upper Huang He Corridor                          | 0                 | 103.7922220  | 36.0563890  | 1417742    | 0                                                           | 0                   | 0             | 0              | 0           |
| laoag      | ph      | Northern Philippine Islands                      | 1                 | 120.5957000  | 18.1978000  | 102109     | 0                                                           | 0                   | 0             | 0              | 0           |
| laohekou   | cn      | Lower Yangtze                                    | 4                 | 111.6677780  | 32.3858330  | 253112     | 0                                                           | 0                   | 0             | 0              | 0           |
| lapu-lapu  | ph      | Northern Philippine Islands                      | 1                 | 123.9494440  | 10.3102780  | 241391     | 0                                                           | 0                   | 0             | 0              | 0           |
| laredo     | us      | Lower Rio Grande - Bravo                         | 14                | -99.5072222  | 27.5061111  | 210769     | 0                                                           | 0                   | 0             | 2              | 2           |
| larisa     | gr      | Vardar                                           | 0                 | 22.4202778   | 39.6372222  | 128760     | 0                                                           | 0                   | 0             | 0              | 0           |
| larkana    | pk      | Lower & Middle Indus                             | 2                 | 68.2141370   | 27.5550820  | 364168     | 0                                                           | 0                   | 0             | 0              | 0           |
| las palmas | es      | Canary Islands                                   | 2                 | -15.4134300  | 28.0997270  | 365418     | 0                                                           | 0                   | 0             | 1              | 1           |
| las tunas  | cu      | Cuba - Cayman Islands                            | 2                 | -76.9511111  | 20.9616667  | 203690     | 0                                                           | 0                   | 0             | 0              | 0           |

Table S2 Cities and freshwater reptiles

| City               | Country | Freshwater Ecoregions of the World (FEOW) Region | Regional richness | Longitude    | Latitude   | Population | # of freshwater reptile species within 50 km of city centre |                     |               |                |             |
|--------------------|---------|--------------------------------------------------|-------------------|--------------|------------|------------|-------------------------------------------------------------|---------------------|---------------|----------------|-------------|
|                    |         |                                                  |                   |              |            |            | Lizard species                                              | Crocodilian species | Snake species | Turtle species | All species |
| las vegas          | us      | Vegas - Virgin                                   | 2                 | -115.1363889 | 36.1750000 | 540111     | 0                                                           | 0                   | 0             | 3              | 3           |
| lasa               | cn      | Upper Brahmaputra                                | 0                 | 91.1000000   | 29.6500000 | 118721     | 0                                                           | 0                   | 0             | 0              | 0           |
| lashio             | mm      | Sitang - Irawaddy                                | 0                 | 97.7500000   | 22.9333333 | 131033     | 0                                                           | 0                   | 0             | 0              | 0           |
| latina             | it      | Italian Peninsula & Islands                      | 6                 | 12.8666670   | 41.4666670 | 124330     | 0                                                           | 0                   | 0             | 2              | 2           |
| latur              | in      | Northern Deccan Plateau                          | 2                 | 76.5833330   | 18.4000000 | 348994     | 0                                                           | 0                   | 0             | 0              | 0           |
| lausanne           | ch      | Central & Western Europe                         | 13                | 6.6666670    | 46.5333330 | 118015     | 0                                                           | 0                   | 0             | 1              | 1           |
| lawang             | id      | Central & Eastern Java                           | 4                 | 112.6947000  | -7.8353000 | 159517     | 0                                                           | 0                   | 0             | 0              | 0           |
| le havre           | fr      | Central & Western Europe                         | 13                | 0.1333330    | 49.5000000 | 188605     | 0                                                           | 0                   | 0             | 0              | 0           |
| le mans            | fr      | Central & Western Europe                         | 13                | 0.2047090    | 48.0003860 | 147413     | 0                                                           | 0                   | 0             | 1              | 1           |
| leeds              | gb      | Central & Western Europe                         | 13                | -1.5833330   | 53.8000000 | 455124     | 0                                                           | 0                   | 0             | 1              | 1           |
| leganes            | es      | Western Iberia                                   | 6                 | -3.7604220   | 40.3269460 | 192000     | 0                                                           | 0                   | 0             | 3              | 3           |
| legaspi            | ph      | Northern Philippine Islands                      | 1                 | 123.7353000  | 13.1387000 | 142871     | 0                                                           | 0                   | 0             | 0              | 0           |
| leghorn            | it      | Italian Peninsula & Islands                      | 6                 | 10.3166670   | 43.5500000 | 146762     | 0                                                           | 0                   | 0             | 2              | 2           |
| legnica            | pl      | Central & Western Europe                         | 13                | 16.1618980   | 51.2100620 | 106033     | 0                                                           | 0                   | 0             | 1              | 1           |
| leicester          | gb      | Central & Western Europe                         | 13                | -1.1333330   | 52.6333330 | 339240     | 0                                                           | 0                   | 0             | 1              | 1           |
| leicester          | gb      | Central & Western Europe                         | 13                | -1.0348940   | 52.6649130 | 339240     | 0                                                           | 0                   | 0             | 1              | 1           |
| leiden             | nl      | Central & Western Europe                         | 13                | 4.5281540    | 52.1762810 | 116928     | 0                                                           | 0                   | 0             | 0              | 0           |
| leipzig            | de      | Central & Western Europe                         | 13                | 12.3333330   | 51.3000000 | 492637     | 0                                                           | 0                   | 0             | 2              | 2           |
| leiyang            | cn      | Lower Yangtze                                    | 4                 | 112.8590780  | 26.4023820 | 129116     | 0                                                           | 0                   | 0             | 0              | 0           |
| lembang            | id      | Southern Sumatra - Western Java                  | 8                 | 107.7025000  | -6.7863890 | 183283     | 0                                                           | 0                   | 0             | 0              | 0           |
| lemesos            | cy      | Southern Anatolia                                | 2                 | 33.0333333   | 34.6750000 | 154018     | 0                                                           | 0                   | 0             | 0              | 0           |
| lengshuijiang      | cn      | Lower Yangtze                                    | 4                 | 111.4294440  | 27.6880560 | 115399     | 0                                                           | 0                   | 0             | 0              | 0           |
| leninsk-kuznetskiy | ru      | Ob                                               | 0                 | 86.1737000   | 54.6567000 | 109025     | 0                                                           | 0                   | 0             | 0              | 0           |
| leon               | ni      | Estero Real - Tempisque                          | 7                 | -86.8794444  | 12.4355556 | 150327     | 0                                                           | 0                   | 0             | 1              | 1           |

Table S2 Cities and freshwater reptiles

| City              | Country | Freshwater Ecoregions of the World (FEOW) Region | Regional richness | Longitude    | Latitude    | Population | # of freshwater reptile species within 50 km of city centre |                     |               |                |             |
|-------------------|---------|--------------------------------------------------|-------------------|--------------|-------------|------------|-------------------------------------------------------------|---------------------|---------------|----------------|-------------|
|                   |         |                                                  |                   |              |             |            | Lizard species                                              | Crocodilian species | Snake species | Turtle species | All species |
| leon              | mx      | Lerma - Chapala                                  | 10                | -101.6666670 | 21.1166670  | 1114662    | 0                                                           | 0                   | 0             | 1              | 1           |
| leon              | es      | Western Iberia                                   | 6                 | -5.5703160   | 42.6000310  | 127480     | 0                                                           | 0                   | 0             | 1              | 1           |
| leshan            | cn      | Middle Yangtze                                   | 1                 | 103.7638600  | 29.5622750  | 154477     | 0                                                           | 0                   | 0             | 0              | 0           |
| leuwiliang        | id      | Southern Sumatra - Western Java                  | 8                 | 106.6369440  | -6.5758330  | 191992     | 1                                                           | 0                   | 2             | 0              | 3           |
| leverkusen        | de      | Central & Western Europe                         | 13                | 6.9833330    | 51.0166670  | 159088     | 0                                                           | 0                   | 0             | 5              | 5           |
| lexington-fayette | us      | Teays - Old Ohio                                 | 17                | -84.4586111  | 38.0497222  | 272079     | 0                                                           | 0                   | 0             | 4              | 4           |
| liancheng         | cn      | Xi Yang                                          | 15                | 110.2817200  | 21.6467340  | 100341     | 0                                                           | 0                   | 0             | 0              | 0           |
| lianran           | cn      | Middle Yangtze                                   | 1                 | 102.4849590  | 24.9227070  | 106795     | 0                                                           | 0                   | 0             | 0              | 0           |
| liaocheng         | cn      | Lower Huang He                                   | 0                 | 115.9647220  | 36.4438890  | 226930     | 0                                                           | 0                   | 0             | 0              | 0           |
| liaoyang          | cn      | Liao He                                          | 0                 | 123.0561110  | 41.2261110  | 687890     | 0                                                           | 0                   | 0             | 0              | 0           |
| libreville        | ga      | Southern Gulf of Guinea Drainages                | 4                 | 9.4500000    | 0.3833333   | 578156     | 0                                                           | 0                   | 0             | 0              | 0           |
| licheng           | cn      | Xi Yang                                          | 15                | 113.8283570  | 23.2955370  | 172775     | 0                                                           | 0                   | 0             | 0              | 0           |
| lichinga          | mz      | Lake Malawi                                      | 5                 | 35.2405556   | -13.3127778 | 109839     | 0                                                           | 0                   | 0             | 0              | 0           |
| liege             | be      | Central & Western Europe                         | 13                | 5.5666670    | 50.6333330  | 182597     | 0                                                           | 0                   | 0             | 2              | 2           |
| likasi            | cd      | Upper Lualaba                                    | 0                 | 26.7333330   | -10.9813890 | 422726     | 0                                                           | 0                   | 0             | 0              | 0           |
| lille             | fr      | Central & Western Europe                         | 13                | 3.0585850    | 50.6329710  | 189746     | 0                                                           | 0                   | 0             | 2              | 2           |
| lilongwe          | mw      | Lake Malawi                                      | 5                 | 33.7833333   | -13.9833333 | 646738     | 0                                                           | 0                   | 0             | 0              | 0           |
| lima              | pe      | Central Andean Pacific Slopes                    | 0                 | -77.0500000  | -12.0500000 | 7646786    | 0                                                           | 0                   | 0             | 0              | 0           |
| limeira           | br      | Upper Parana                                     | 3                 | -47.4027780  | -22.5616670 | 289671     | 0                                                           | 1                   | 0             | 1              | 2           |
| limoges           | fr      | Central & Western Europe                         | 13                | 1.2578050    | 45.8315340  | 134549     | 0                                                           | 0                   | 0             | 0              | 0           |
| linchuan          | cn      | Lower Yangtze                                    | 4                 | 116.2926880  | 27.9382740  | 125847     | 0                                                           | 0                   | 0             | 0              | 0           |
| lincoln           | us      | Middle Missouri                                  | 12                | -96.6666667  | 40.8000000  | 242072     | 0                                                           | 0                   | 0             | 2              | 2           |
| linfen            | cn      | Lower Huang He                                   | 0                 | 111.5188890  | 36.0888890  | 232566     | 0                                                           | 0                   | 0             | 0              | 0           |
| linhai            | cn      | Coastal Fujian - Zeijang                         | 1                 | 121.1166670  | 28.8500000  | 152937     | 0                                                           | 0                   | 0             | 0              | 0           |

Table S2 Cities and freshwater reptiles

| City        | Country | Freshwater Ecoregions of the World (FEOW) Region | Regional richness | Longitude    | Latitude    | Population | # of freshwater reptile species within 50 km of city centre |                     |               |                |             |
|-------------|---------|--------------------------------------------------|-------------------|--------------|-------------|------------|-------------------------------------------------------------|---------------------|---------------|----------------|-------------|
|             |         |                                                  |                   |              |             |            | Lizard species                                              | Crocodilian species | Snake species | Turtle species | All species |
| linhares    | br      | Northeastern Mata Atlantica                      | 1                 | -40.0666670  | -19.4166670 | 105084     | 0                                                           | 0                   | 0             | 0              | 0           |
| linqing     | cn      | Lower Huang He                                   | 0                 | 115.7116670  | 36.8455560  | 110046     | 0                                                           | 0                   | 0             | 0              | 0           |
| linshui     | cn      | Lower Huang He                                   | 0                 | 114.2047220  | 36.4247220  | 109955     | 0                                                           | 0                   | 0             | 0              | 0           |
| linxi       | cn      | Lower Huang He                                   | 0                 | 118.4333330  | 39.7000000  | 100316     | 0                                                           | 0                   | 0             | 0              | 0           |
| linxia      | cn      | Upper Huang He Corridor                          | 0                 | 103.2063890  | 35.6002780  | 202402     | 0                                                           | 0                   | 0             | 0              | 0           |
| linz        | at      | Upper Danube                                     | 5                 | 14.3000000   | 48.3000000  | 181163     | 0                                                           | 0                   | 0             | 0              | 0           |
| lipa        | ph      | Northern Philippine Islands                      | 1                 | 121.1631000  | 13.9411000  | 213525     | 0                                                           | 0                   | 0             | 0              | 0           |
| lipetsk     | ru      | Don                                              | 1                 | 39.5707620   | 52.6031110  | 515659     | 0                                                           | 0                   | 0             | 0              | 0           |
| lira        | ug      | Lake Victoria Basin                              | 5                 | 32.9097222   | 2.2350000   | 119302     | 0                                                           | 0                   | 0             | 0              | 0           |
| lisbon      | pt      | Western Iberia                                   | 6                 | -9.1333330   | 38.7166670  | 517798     | 0                                                           | 0                   | 0             | 3              | 3           |
| little rock | us      | Ouachita Highlands                               | 23                | -92.2894444  | 34.7463889  | 184217     | 0                                                           | 1                   | 1             | 13             | 15          |
| liusha      | cn      | Coastal Fujian - Zeijang                         | 1                 | 116.1686910  | 23.3107220  | 118023     | 0                                                           | 0                   | 0             | 0              | 0           |
| liuzhou     | cn      | Xi Yang                                          | 15                | 109.3891570  | 24.3125820  | 763168     | 0                                                           | 0                   | 0             | 0              | 0           |
| liverpool   | gb      | Central & Western Europe                         | 13                | -3.0000000   | 53.4166670  | 468946     | 0                                                           | 0                   | 0             | 1              | 1           |
| livingstone | zm      | Middle Zambezi - Luangwa                         | 3                 | 25.8666667   | -17.8500000 | 109218     | 0                                                           | 1                   | 0             | 0              | 1           |
| ljubljana   | si      | Dniester - Lower Danube                          | 3                 | 14.5144444   | 46.0552778  | 255115     | 0                                                           | 0                   | 0             | 0              | 0           |
| lleida      | es      | Eastern Iberia                                   | 13                | 0.6333330    | 41.6166670  | 119320     | 0                                                           | 0                   | 0             | 3              | 3           |
| loa janan   | id      | Eastern Borneo                                   | 3                 | 117.0833330  | -0.5833330  | 212820     | 0                                                           | 0                   | 0             | 1              | 1           |
| lobito      | ao      | Cuanza                                           | 3                 | 13.5997220   | -12.3197220 | 207957     | 0                                                           | 0                   | 0             | 0              | 0           |
| logrono     | es      | Eastern Iberia                                   | 13                | -2.4500000   | 42.4666670  | 142103     | 0                                                           | 0                   | 0             | 3              | 3           |
| loja        | ec      | Amazonas High Andes                              | 1                 | -79.2166667  | -4.0000000  | 117796     | 0                                                           | 0                   | 0             | 0              | 0           |
| london      | gb      | Central & Western Europe                         | 13                | -0.0936890   | 51.5141250  | 7421228    | 0                                                           | 0                   | 0             | 5              | 5           |
| london      | ca      | Laurentian Great Lakes                           | 16                | -81.2500000  | 42.9833330  | 346774     | 0                                                           | 0                   | 0             | 5              | 5           |
| londrina    | br      | Upper Parana                                     | 3                 | -51.1500000  | -23.3000000 | 471836     | 0                                                           | 0                   | 0             | 0              | 0           |
| long beach  | us      | Southern California Coastal - Baja California    | 12                | -118.1883333 | 33.7669444  | 482618     | 0                                                           | 0                   | 0             | 8              | 8           |

Table S2 Cities and freshwater reptiles

| City         | Country | Freshwater Ecoregions of the World (FEOW) Region   | Regional richness | Longitude    | Latitude    | Population | # of freshwater reptile species within 50 km of city centre |                     |               |                |             |
|--------------|---------|----------------------------------------------------|-------------------|--------------|-------------|------------|-------------------------------------------------------------|---------------------|---------------|----------------|-------------|
|              |         |                                                    |                   |              |             |            | Lizard species                                              | Crocodilian species | Snake species | Turtle species | All species |
| long xuyen   | vn      | Mekong Delta                                       | 3                 | 105.4166670  | 10.3833330  | 158159     | 0                                                           | 0                   | 0             | 0              | 0           |
| longfeng     | cn      | Songhua Jiang                                      | 0                 | 125.1166670  | 46.5500000  | 152074     | 0                                                           | 0                   | 0             | 0              | 0           |
| longjiang    | cn      | Songhua Jiang                                      | 0                 | 123.1836110  | 47.3302780  | 106384     | 0                                                           | 0                   | 0             | 0              | 0           |
| longjing     | cn      | Hamgyong - Sanmaek                                 | 0                 | 129.4233330  | 42.7713890  | 117185     | 0                                                           | 0                   | 0             | 0              | 0           |
| longyan      | cn      | Coastal Fujian - Zeijang                           | 1                 | 117.0225000  | 25.1072220  | 125778     | 0                                                           | 0                   | 0             | 0              | 0           |
| loni         | in      | Ganges Delta & Plain                               | 13                | 77.2833330   | 28.7500000  | 164927     | 0                                                           | 0                   | 0             | 0              | 0           |
| lopez mateos | mx      | Lerma - Chapala                                    | 10                | -99.2613890  | 19.5583330  | 521056     | 0                                                           | 0                   | 0             | 5              | 5           |
| los angeles  | cl      | South Andean Pacific Slopes                        | 0                 | -72.3500000  | -37.4666670 | 125431     | 0                                                           | 0                   | 0             | 8              | 8           |
| los angeles  | us      | Southern California Coastal - Baja California      | 12                | -118.2427778 | 34.0522222  | 3877129    | 0                                                           | 0                   | 0             | 8              | 8           |
| los mochos   | mx      | Sinaloa                                            | 11                | -108.9666670 | 25.7666670  | 214610     | 0                                                           | 0                   | 0             | 3              | 3           |
| los reyes    | mx      | Lerma - Chapala                                    | 10                | -98.9666670  | 19.3500000  | 251179     | 0                                                           | 0                   | 0             | 5              | 5           |
| los teques   | ve      | South America Caribbean Drainages - Trinidad       | 6                 | -67.0333333  | 10.3500000  | 173749     | 0                                                           | 0                   | 0             | 0              | 0           |
| loudi        | cn      | Lower Yangtze                                      | 4                 | 111.9944440  | 27.7344440  | 150684     | 0                                                           | 0                   | 0             | 0              | 0           |
| louga        | sn      | Senegal - Gambia                                   | 4                 | -16.2166667  | 15.6166667  | 117333     | 0                                                           | 0                   | 0             | 0              | 0           |
| louisville   | us      | Teays - Old Ohio                                   | 17                | -85.7594444  | 38.2541667  | 243639     | 0                                                           | 0                   | 0             | 4              | 4           |
| loum         | cm      | Western Equatorial Crater Lakes                    | 0                 | 9.7463889    | 4.7161111   | 177448     | 0                                                           | 0                   | 0             | 0              | 0           |
| lowell       | us      | Northeast US & Southeast Canada Atlantic Drainages | 18                | -71.3166667  | 42.6333333  | 103469     | 0                                                           | 0                   | 0             | 7              | 7           |
| lower hutt   | nz      | New Zealand                                        | 2                 | 174.9166670  | -41.2166670 | 101194     | 0                                                           | 0                   | 0             | 0              | 0           |
| luan         | cn      | Lower Yangtze                                      | 4                 | 116.4913890  | 31.7569440  | 179665     | 0                                                           | 0                   | 0             | 0              | 0           |
| luancheng    | cn      | Lower Huang He                                     | 0                 | 114.6516670  | 37.8791670  | 597130     | 0                                                           | 0                   | 0             | 0              | 0           |
| luanda       | ao      | Cuanza                                             | 3                 | 13.2331740   | -8.8368040  | 2776125    | 1                                                           | 0                   | 1             | 0              | 2           |
| luanshya     | zm      | Zambeian Headwaters                                | 1                 | 28.4000000   | -13.1333333 | 113379     | 0                                                           | 0                   | 0             | 0              | 0           |
| lubango      | ao      | Zambeian Headwaters                                | 1                 | 13.5000000   | -14.9166670 | 102541     | 0                                                           | 0                   | 0             | 0              | 0           |
| lubbock      | us      | East Texas Gulf                                    | 34                | -101.8547222 | 33.5777778  | 211387     | 0                                                           | 0                   | 0             | 4              | 4           |

Table S2 Cities and freshwater reptiles

| City         | Country | Freshwater Ecoregions of the World (FEOW) Region | Regional richness | Longitude   | Latitude    | Population | # of freshwater reptile species within 50 km of city centre |                     |               |                |             |
|--------------|---------|--------------------------------------------------|-------------------|-------------|-------------|------------|-------------------------------------------------------------|---------------------|---------------|----------------|-------------|
|              |         |                                                  |                   |             |             |            | Lizard species                                              | Crocodilian species | Snake species | Turtle species | All species |
| lubeck       | de      | Central & Western Europe                         | 13                | 10.7000000  | 53.8666670  | 213171     | 0                                                           | 0                   | 0             | 1              | 1           |
| lublin       | pl      | Central & Western Europe                         | 13                | 22.5666670  | 51.2500000  | 360044     | 0                                                           | 0                   | 0             | 1              | 1           |
| lubumbashi   | cd      | Bangweulu - Mweru                                | 3                 | 27.4666670  | -11.6666670 | 1374808    | 0                                                           | 0                   | 0             | 0              | 0           |
| lucena       | ph      | Northern Philippine Islands                      | 1                 | 121.6127000 | 13.9348000  | 228738     | 0                                                           | 0                   | 0             | 0              | 0           |
| luchou       | tw      | Western Taiwan                                   | 2                 | 121.4700000 | 25.0830556  | 203059     | 0                                                           | 0                   | 0             | 2              | 2           |
| ludhiana     | in      | Lower & Middle Indus                             | 2                 | 75.8500000  | 30.9000000  | 1545476    | 0                                                           | 0                   | 0             | 0              | 0           |
| ludwigshafen | de      | Central & Western Europe                         | 13                | 8.4352780   | 49.4811110  | 162514     | 0                                                           | 0                   | 0             | 3              | 3           |
| lumajang     | id      | Indian Ocean Slope of Sumatra & Java             | 9                 | 113.2248000 | -8.1335000  | 123640     | 0                                                           | 0                   | 0             | 0              | 0           |
| luohe        | cn      | Lower Yangtze                                    | 4                 | 114.0352780 | 33.5716670  | 417356     | 0                                                           | 0                   | 0             | 0              | 0           |
| luoyang      | cn      | Lower Huang He                                   | 0                 | 112.4536110 | 34.6836110  | 1390581    | 0                                                           | 0                   | 0             | 0              | 0           |
| luoyang      | cn      | Xi Yang                                          | 15                | 114.2734230 | 23.1624420  | 123144     | 0                                                           | 0                   | 0             | 0              | 0           |
| luqiao       | cn      | Coastal Fujian - Zeijang                         | 1                 | 121.3771480 | 28.5808350  | 427890     | 0                                                           | 0                   | 0             | 0              | 0           |
| luque        | py      | Paraguay                                         | 8                 | -57.5666670 | -25.2666670 | 209836     | 0                                                           | 1                   | 0             | 0              | 1           |
| lusaka       | zm      | Middle Zambezi - Luangwa                         | 3                 | 28.2833333  | -15.4166667 | 1267458    | 1                                                           | 1                   | 1             | 0              | 3           |
| luton        | gb      | Central & Western Europe                         | 13                | -0.4166670  | 51.8833330  | 193670     | 0                                                           | 0                   | 0             | 1              | 1           |
| luxor        | eg      | Lower Nile                                       | 1                 | 32.6500000  | 25.6833333  | 422408     | 1                                                           | 0                   | 0             | 0              | 1           |
| luzhou       | cn      | Middle Yangtze                                   | 1                 | 105.4404900 | 28.8723910  | 295056     | 0                                                           | 0                   | 0             | 0              | 0           |
| luziania     | br      | Upper Parana                                     | 3                 | -47.9333330 | -16.2500000 | 143601     | 0                                                           | 0                   | 0             | 0              | 0           |
| lvov         | ua      | Central & Western Europe                         | 13                | 24.0304510  | 49.8406610  | 830000     | 0                                                           | 0                   | 0             | 0              | 0           |
| lyon         | fr      | Central & Western Europe                         | 13                | 4.8467110   | 45.7484570  | 463700     | 0                                                           | 0                   | 0             | 2              | 2           |
| lyubertsy    | ru      | Volga - Ural                                     | 0                 | 37.8932170  | 55.6771930  | 154653     | 0                                                           | 0                   | 0             | 0              | 0           |
| maanshan     | cn      | Lower Yangtze                                    | 4                 | 118.4982480 | 31.6956780  | 540198     | 0                                                           | 0                   | 0             | 0              | 0           |
| maastricht   | nl      | Central & Western Europe                         | 13                | 5.6833330   | 50.8500000  | 122383     | 0                                                           | 0                   | 0             | 4              | 4           |
| maba         | cn      | Xi Yang                                          | 15                | 113.5983860 | 24.6841250  | 113609     | 0                                                           | 0                   | 0             | 1              | 1           |
| mabalacat    | ph      | Northern Philippine Islands                      | 1                 | 120.5736000 | 15.2216000  | 188057     | 0                                                           | 0                   | 0             | 0              | 0           |

Table S2 Cities and freshwater reptiles

| City          | Country | Freshwater Ecoregions of the World (FEOW) Region | Regional richness | Longitude   | Latitude    | Population | # of freshwater reptile species within 50 km of city centre |                     |               |                |             |
|---------------|---------|--------------------------------------------------|-------------------|-------------|-------------|------------|-------------------------------------------------------------|---------------------|---------------|----------------|-------------|
|               |         |                                                  |                   |             |             |            | Lizard species                                              | Crocodilian species | Snake species | Turtle species | All species |
| macae         | br      | Fluminense                                       | 1                 | -41.7833330 | -22.3833330 | 143031     | 0                                                           | 0                   | 0             | 0              | 0           |
| macapa        | br      | Amazonas Estuary & Coastal Drainages             | 0                 | -51.0500000 | 0.0333330   | 338937     | 0                                                           | 0                   | 0             | 0              | 0           |
| maceio        | br      | Northeastern Caatinga & Coastal Drainages        | 1                 | -35.7166670 | -9.6666670  | 955010     | 0                                                           | 0                   | 0             | 0              | 0           |
| machala       | ec      | North Andean Pacific Slopes - Rio Atrato         | 14                | -79.9666667 | -3.2666667  | 198123     | 0                                                           | 0                   | 0             | 1              | 1           |
| macheng       | cn      | Lower Yangtze                                    | 4                 | 115.0319440 | 31.1783330  | 126366     | 0                                                           | 0                   | 0             | 0              | 0           |
| machida       | jp      | Honshu - Shikoku - Kyushu                        | 5                 | 139.4508330 | 35.5402780  | 399971     | 0                                                           | 0                   | 0             | 3              | 3           |
| machilipatnam | in      | Southern Deccan Plateau                          | 0                 | 81.1333330  | 16.1666670  | 192848     | 0                                                           | 0                   | 0             | 0              | 0           |
| madanapalle   | in      | Southern Deccan Plateau                          | 0                 | 78.5000000  | 13.5500000  | 108605     | 0                                                           | 0                   | 0             | 0              | 0           |
| madhyamgram   | in      | Ganges Delta & Plain                             | 13                | 88.4500000  | 22.7000000  | 161142     | 1                                                           | 0                   | 0             | 0              | 1           |
| madison       | us      | Upper Mississippi                                | 20                | -89.4011111 | 43.0730556  | 224625     | 0                                                           | 0                   | 0             | 3              | 3           |
| madiun        | id      | Central & Eastern Java                           | 4                 | 111.5239000 | -7.6298000  | 186116     | 0                                                           | 0                   | 0             | 0              | 0           |
| madras        | in      | Southeastern Ghats                               | 3                 | 80.2833330  | 13.0833330  | 4328416    | 0                                                           | 2                   | 0             | 0              | 2           |
| madrid        | es      | Western Iberia                                   | 6                 | -3.6922200  | 40.4085660  | 3102644    | 0                                                           | 0                   | 0             | 3              | 3           |
| madurai       | in      | Southeastern Ghats                               | 3                 | 78.1166670  | 9.9333330   | 909988     | 0                                                           | 0                   | 0             | 0              | 0           |
| magangue      | co      | Magdalena - Sinu                                 | 15                | -74.7546710 | 9.2420240   | 100315     | 1                                                           | 1                   | 0             | 2              | 4           |
| magdeburg     | de      | Central & Western Europe                         | 13                | 11.6666670  | 52.1666670  | 224428     | 0                                                           | 0                   | 0             | 1              | 1           |
| mage          | br      | Fluminense                                       | 1                 | -43.0152780 | -22.6555560 | 216342     | 0                                                           | 1                   | 0             | 0              | 1           |
| magelang      | id      | Indian Ocean Slope of Sumatra & Java             | 9                 | 110.2177780 | -7.4705560  | 111470     | 0                                                           | 0                   | 1             | 0              | 1           |
| magnitogorsk  | ru      | Volga - Ural                                     | 0                 | 59.0472220  | 53.4186110  | 413357     | 0                                                           | 0                   | 0             | 0              | 0           |
| mahabad       | ir      | Orumiyeh                                         | 0                 | 45.7229000  | 36.7499000  | 162448     | 0                                                           | 0                   | 0             | 0              | 0           |
| mahajanga     | mg      | Northwestern Madagascar                          | 2                 | 46.3166667  | -15.7166667 | 154670     | 0                                                           | 0                   | 0             | 0              | 0           |
| mahbubnagar   | in      | Southern Deccan Plateau                          | 0                 | 77.9833330  | 16.7333330  | 136150     | 0                                                           | 0                   | 0             | 0              | 0           |
| mahesana      | in      | Lower & Middle Indus                             | 2                 | 72.4000000  | 23.6000000  | 102675     | 0                                                           | 0                   | 0             | 0              | 0           |
| maicao        | co      | South America Caribbean Drainages - Trinidad     | 6                 | -72.2432080 | 11.3832080  | 130351     | 0                                                           | 0                   | 0             | 0              | 0           |

Table S2 Cities and freshwater reptiles

| City        | Country | Freshwater Ecoregions of the World (FEOW) Region | Regional richness | Longitude   | Latitude   | Population | # of freshwater reptile species within 50 km of city centre |                     |               |                |             |
|-------------|---------|--------------------------------------------------|-------------------|-------------|------------|------------|-------------------------------------------------------------|---------------------|---------------|----------------|-------------|
|             |         |                                                  |                   |             |            |            | Lizard species                                              | Crocodilian species | Snake species | Turtle species | All species |
| maiduguri   | ng      | Lake Chad                                        | 0                 | 13.1602740  | 11.8464410 | 1112511    | 0                                                           | 0                   | 0             | 0              | 0           |
| mainz       | de      | Central & Western Europe                         | 13                | 8.2711110   | 50.0000000 | 187940     | 0                                                           | 0                   | 0             | 5              | 5           |
| maisuru     | in      | Southeastern Ghats                               | 3                 | 76.6497220  | 12.3072220 | 868385     | 0                                                           | 1                   | 0             | 0              | 1           |
| majalaya    | id      | Southern Sumatra - Western Java                  | 8                 | 107.7631000 | -7.0485000 | 226720     | 0                                                           | 0                   | 0             | 0              | 0           |
| makasar     | id      | Sulawesi                                         | 2                 | 119.4221000 | -5.1400000 | 1321832    | 0                                                           | 0                   | 0             | 0              | 0           |
| makati      | ph      | Northern Philippine Islands                      | 1                 | 121.0333330 | 14.5666670 | 510383     | 0                                                           | 0                   | 0             | 0              | 0           |
| makhachkala | ru      | Western Caspian Drainages                        | 0                 | 47.5023560  | 42.9763780 | 497967     | 0                                                           | 0                   | 0             | 0              | 0           |
| makiyivka   | ua      | Don                                              | 1                 | 37.9257640  | 48.0478160 | 376607     | 0                                                           | 0                   | 0             | 0              | 0           |
| makurdi     | ng      | Lower Niger - Benue                              | 2                 | 8.5121000   | 7.7411000  | 292664     | 0                                                           | 0                   | 0             | 0              | 0           |
| malabo      | gq      | Northern Gulf of Guinea Drainages - Bioko        | 1                 | 8.7833333   | 3.7500000  | 156039     | 0                                                           | 0                   | 0             | 0              | 0           |
| malaga      | es      | Southern Iberia                                  | 8                 | -4.4348020  | 36.7266660 | 557875     | 0                                                           | 1                   | 0             | 5              | 6           |
| malakal     | sd      | Upper Nile                                       | 2                 | 31.6561111  | 9.5369444  | 160893     | 0                                                           | 0                   | 0             | 0              | 0           |
| malambo     | co      | Magdalena - Sinu                                 | 15                | -74.7738610 | 10.8595330 | 101536     | 0                                                           | 0                   | 0             | 2              | 2           |
| malang      | id      | Central & Eastern Java                           | 4                 | 112.6304000 | -7.9797000 | 746780     | 1                                                           | 0                   | 0             | 0              | 1           |
| malatya     | tr      | Upper Tigris & Euphrates                         | 3                 | 38.3166690  | 38.3501830 | 442046     | 0                                                           | 0                   | 0             | 0              | 0           |
| malegaon    | in      | Namuda - Tapi                                    | 1                 | 74.5333330  | 20.5500000 | 435397     | 0                                                           | 0                   | 0             | 0              | 0           |
| maler kotla | in      | Lower & Middle Indus                             | 2                 | 75.8833330  | 30.5166670 | 113848     | 0                                                           | 0                   | 0             | 0              | 0           |
| malmo       | se      | Northern Baltic Drainages                        | 2                 | 13.0000000  | 55.6000000 | 261549     | 0                                                           | 0                   | 0             | 2              | 2           |
| malolos     | ph      | Northern Philippine Islands                      | 1                 | 120.8116670 | 14.8419440 | 198763     | 0                                                           | 0                   | 0             | 0              | 0           |
| man         | ci      | Eburneo                                          | 0                 | -7.5538300  | 7.4125130  | 140217     | 0                                                           | 0                   | 0             | 0              | 0           |
| manado      | id      | Sulawesi                                         | 2                 | 124.8455000 | 1.4870000  | 451910     | 1                                                           | 0                   | 1             | 1              | 3           |
| managua     | ni      | San Juan (Nicaragua/Costa Rica)                  | 17                | -86.2683333 | 12.1508333 | 1140499    | 0                                                           | 0                   | 0             | 1              | 1           |
| manama      | bh      | Arabian Interior                                 | 1                 | 50.5830556  | 26.2361111 | 147097     | 0                                                           | 0                   | 0             | 0              | 0           |
| manaus      | br      | Rio Negro                                        | 1                 | -60.0252780 | -3.1133330 | 1598227    | 0                                                           | 1                   | 0             | 0              | 1           |
| manbij      | sy      | Upper Tigris & Euphrates                         | 3                 | 37.9563889  | 36.5266667 | 105420     | 0                                                           | 0                   | 0             | 0              | 0           |

Table S2 Cities and freshwater reptiles

| City            | Country | Freshwater Ecoregions of the World (FEOW) Region   | Regional richness | Longitude    | Latitude    | Population | # of freshwater reptile species within 50 km of city centre |                     |               |                |             |
|-----------------|---------|----------------------------------------------------|-------------------|--------------|-------------|------------|-------------------------------------------------------------|---------------------|---------------|----------------|-------------|
|                 |         |                                                    |                   |              |             |            | Lizard species                                              | Crocodilian species | Snake species | Turtle species | All species |
| manchester      | gb      | Central & Western Europe                           | 13                | -2.2166670   | 53.5000000  | 395516     | 0                                                           | 0                   | 0             | 4              | 4           |
| manchester      | us      | Northeast US & Southeast Canada Atlantic Drainages | 18                | -71.4552778  | 42.9955556  | 109877     | 0                                                           | 0                   | 0             | 4              | 4           |
| mandalay        | mm      | Sitang - Irawaddy                                  | 0                 | 96.0833333   | 22.0000000  | 1208227    | 0                                                           | 0                   | 0             | 0              | 0           |
| mandaue         | ph      | Northern Philippine Islands                        | 1                 | 123.9222220  | 10.3236110  | 288898     | 0                                                           | 0                   | 0             | 0              | 0           |
| mandi bahaiddin | pk      | Lower & Middle Indus                               | 2                 | 73.4843150   | 32.5833870  | 129770     | 0                                                           | 0                   | 0             | 0              | 0           |
| mandsaur        | in      | Ganges Delta & Plain                               | 13                | 75.0666670   | 24.0666670  | 125002     | 0                                                           | 0                   | 0             | 0              | 0           |
| mandya          | in      | Southeastern Ghats                                 | 3                 | 76.8958330   | 12.5241670  | 134857     | 0                                                           | 1                   | 0             | 0              | 1           |
| mangaluru       | in      | Western Ghats                                      | 4                 | 74.8352780   | 12.8638890  | 417423     | 0                                                           | 0                   | 0             | 0              | 0           |
| manila          | ph      | Northern Philippine Islands                        | 1                 | 120.9822000  | 14.6042000  | 10443877   | 0                                                           | 0                   | 0             | 0              | 0           |
| manisa          | tr      | Western Anatolia                                   | 5                 | 27.4264650   | 38.6120180  | 244095     | 0                                                           | 0                   | 0             | 0              | 0           |
| manizales       | co      | Magdalena - Sinu                                   | 15                | -75.5173830  | 5.0688900   | 357819     | 0                                                           | 0                   | 0             | 1              | 1           |
| mannheim        | de      | Central & Western Europe                           | 13                | 8.4647220    | 49.4883330  | 309626     | 0                                                           | 0                   | 0             | 3              | 3           |
| manta           | ec      | North Andean Pacific Slopes - Rio Atrato           | 14                | -80.7333333  | -0.9500000  | 183166     | 0                                                           | 0                   | 0             | 0              | 0           |
| manzanillo      | mx      | Ameca - Manantlan                                  | 11                | -104.3333330 | 19.0500000  | 110738     | 0                                                           | 1                   | 0             | 0              | 1           |
| manzanillo      | cu      | Cuba - Cayman Islands                              | 2                 | -77.1166667  | 20.3433333  | 128194     | 0                                                           | 1                   | 0             | 0              | 1           |
| manzini         | sz      | Zambezian Lowveld                                  | 10                | 31.3666667   | -26.4833333 | 110543     | 0                                                           | 1                   | 0             | 1              | 2           |
| maoming         | cn      | Xi Yang                                            | 15                | 110.9000000  | 21.6500000  | 473251     | 0                                                           | 0                   | 0             | 0              | 0           |
| maputo          | mz      | Zambezian Lowveld                                  | 10                | 32.5891667   | -25.9652778 | 1191613    | 0                                                           | 0                   | 0             | 0              | 0           |
| mar del plata   | ar      | Bonaerensean Drainages                             | 1                 | -57.5575390  | -38.0022780 | 645771     | 0                                                           | 0                   | 0             | 0              | 0           |
| maraba          | br      | Tocantins - Araguaia                               | 0                 | -49.1166670  | -5.3500000  | 145865     | 0                                                           | 0                   | 0             | 0              | 0           |
| maracaibo       | ve      | Maracaibo                                          | 0                 | -71.6405556  | 10.6316667  | 1948269    | 0                                                           | 0                   | 0             | 0              | 0           |
| maracanau       | br      | Northeastern Caatinga & Coastal Drainages          | 1                 | -38.6333330  | -3.8666670  | 193532     | 0                                                           | 0                   | 0             | 0              | 0           |
| maracay         | ve      | Orinoco Piedmont                                   | 10                | -67.5958333  | 10.2469444  | 395412     | 0                                                           | 0                   | 0             | 1              | 1           |
| maradi          | ne      | Lower Niger - Benue                                | 2                 | 7.0963889    | 13.4916667  | 163501     | 0                                                           | 0                   | 0             | 0              | 0           |

Table S2 Cities and freshwater reptiles

| City              | Country | Freshwater Ecoregions of the World (FEOW) Region | Regional richness | Longitude   | Latitude    | Population | # of freshwater reptile species within 50 km of city centre |                     |               |                |             |
|-------------------|---------|--------------------------------------------------|-------------------|-------------|-------------|------------|-------------------------------------------------------------|---------------------|---------------|----------------|-------------|
|                   |         |                                                  |                   |             |             |            | Lizard species                                              | Crocodilian species | Snake species | Turtle species | All species |
| maragheh          | ir      | Orumiyeh                                         | 0                 | 46.2376000  | 37.3893000  | 168290     | 0                                                           | 0                   | 0             | 0              | 0           |
| marand            | ir      | Kura - South Caspian Drainages                   | 4                 | 45.7749000  | 38.4329000  | 124201     | 0                                                           | 0                   | 0             | 0              | 0           |
| marawi            | ph      | Mindanao                                         | 1                 | 124.2927780 | 7.9986110   | 143546     | 0                                                           | 0                   | 0             | 0              | 0           |
| marbella          | es      | Southern Iberia                                  | 8                 | -4.8857450  | 36.5104850  | 115484     | 0                                                           | 1                   | 0             | 5              | 6           |
| mardan            | pk      | Lower & Middle Indus                             | 2                 | 72.0525390  | 34.2019460  | 300545     | 0                                                           | 0                   | 0             | 0              | 0           |
| mariara           | ve      | Orinoco Piedmont                                 | 10                | -67.7161111 | 10.2983333  | 105511     | 0                                                           | 0                   | 0             | 1              | 1           |
| marilia           | br      | Upper Parana                                     | 3                 | -49.9333330 | -22.2166670 | 212222     | 0                                                           | 0                   | 0             | 0              | 0           |
| maringa           | br      | Upper Parana                                     | 3                 | -51.9166670 | -23.4166670 | 311727     | 0                                                           | 0                   | 0             | 0              | 0           |
| marivan           | ir      | Upper Tigris & Euphrates                         | 3                 | 46.1763000  | 35.5270000  | 111495     | 0                                                           | 0                   | 0             | 0              | 0           |
| maroua            | cm      | Lake Chad                                        | 0                 | 14.3247222  | 10.5955556  | 319974     | 0                                                           | 0                   | 0             | 0              | 0           |
| marrakesh         | ma      | Atlantic Northwest Africa                        | 3                 | -8.0082810  | 31.6314850  | 942631     | 0                                                           | 0                   | 0             | 1              | 1           |
| marseille         | fr      | Cantabric Coast - Languedoc                      | 10                | 5.3760600   | 43.2854130  | 792823     | 0                                                           | 0                   | 0             | 2              | 2           |
| martapura         | id      | Southeastern Borneo                              | 6                 | 114.8500000 | -3.4166670  | 131452     | 1                                                           | 0                   | 0             | 0              | 1           |
| marv dasht        | ir      | Upper Tigris & Euphrates                         | 3                 | 52.8025000  | 29.8742000  | 129483     | 0                                                           | 0                   | 0             | 0              | 0           |
| masaya            | ni      | San Juan (Nicaragua/Costa Rica)                  | 17                | -86.1000000 | 11.9666667  | 123474     | 0                                                           | 0                   | 0             | 1              | 1           |
| maseru            | ls      | Southern Temperate Highveld                      | 5                 | 27.4833333  | -29.3166667 | 194387     | 0                                                           | 0                   | 0             | 0              | 0           |
| mashhad           | ir      | Upper Amu Darya                                  | 0                 | 59.6062000  | 36.2970000  | 2307254    | 0                                                           | 0                   | 0             | 0              | 0           |
| masjed-e soleyman | ir      | Upper Tigris & Euphrates                         | 3                 | 49.3039000  | 31.9364000  | 111522     | 0                                                           | 0                   | 0             | 0              | 0           |
| matadi            | cd      | Lower Congo                                      | 0                 | 13.4500000  | -5.8166670  | 180115     | 0                                                           | 0                   | 0             | 0              | 0           |
| matamoros         | mx      | Lower Rio Grande - Bravo                         | 14                | -97.5000000 | 25.8833330  | 435159     | 0                                                           | 1                   | 0             | 3              | 4           |
| matanzas          | cu      | Cuba - Cayman Islands                            | 2                 | -81.5775000 | 23.0411111  | 146738     | 0                                                           | 0                   | 0             | 0              | 0           |
| mataram           | id      | Lesser Sunda Islands                             | 3                 | 116.1166670 | -8.5833330  | 318712     | 1                                                           | 0                   | 0             | 0              | 1           |
| mataro            | es      | Eastern Iberia                                   | 13                | 2.4445030   | 41.5421130  | 114923     | 0                                                           | 0                   | 0             | 11             | 11          |
| mathura           | in      | Ganges Delta & Plain                             | 13                | 77.6833330  | 27.5000000  | 330543     | 0                                                           | 1                   | 0             | 3              | 4           |
| matola            | mz      | Zambeian Lowveld                                 | 10                | 32.4588889  | -25.9622222 | 543907     | 0                                                           | 0                   | 0             | 0              | 0           |

Table S2 Cities and freshwater reptiles

| City       | Country | Freshwater Ecoregions of the World (FEOW) Region | Regional richness | Longitude    | Latitude    | Population | # of freshwater reptile species within 50 km of city centre |                     |               |                |             |
|------------|---------|--------------------------------------------------|-------------------|--------------|-------------|------------|-------------------------------------------------------------|---------------------|---------------|----------------|-------------|
|            |         |                                                  |                   |              |             |            | Lizard species                                              | Crocodilian species | Snake species | Turtle species | All species |
| matsubara  | jp      | Honshu - Shikoku - Kyushu                        | 5                 | 135.5500000  | 34.5666670  | 130857     | 0                                                           | 0                   | 0             | 1              | 1           |
| matsudo    | jp      | Honshu - Shikoku - Kyushu                        | 5                 | 139.9000000  | 35.7833330  | 470287     | 0                                                           | 0                   | 0             | 3              | 3           |
| matsumoto  | jp      | Honshu - Shikoku - Kyushu                        | 5                 | 137.9666670  | 36.2333330  | 210669     | 0                                                           | 0                   | 0             | 0              | 0           |
| matsusaka  | jp      | Honshu - Shikoku - Kyushu                        | 5                 | 136.5333330  | 34.5666670  | 124614     | 0                                                           | 0                   | 0             | 0              | 0           |
| maturin    | ve      | Orinoco Delta & Coastal Drainages                | 0                 | -63.1766667  | 9.7500000   | 410967     | 0                                                           | 0                   | 0             | 0              | 0           |
| mau        | in      | Ganges Delta & Plain                             | 13                | 83.5611110   | 25.9416670  | 246074     | 0                                                           | 0                   | 0             | 0              | 0           |
| maua       | br      | Upper Parana                                     | 3                 | -46.4500000  | -23.6666670 | 386077     | 0                                                           | 0                   | 0             | 1              | 1           |
| mawlamyine | mm      | Lower & Middle Salween                           | 5                 | 97.6255556   | 16.4913889  | 438907     | 0                                                           | 0                   | 0             | 0              | 0           |
| maxixe     | mz      | Zambeian Lowveld                                 | 10                | 35.3472222   | -23.8597222 | 119868     | 0                                                           | 0                   | 0             | 0              | 0           |
| maykop     | ru      | Kuban                                            | 0                 | 40.1058330   | 44.6077780  | 158453     | 0                                                           | 0                   | 0             | 0              | 0           |
| maymyo     | mm      | Sitang - Irawaddy                                | 0                 | 96.4666667   | 22.0333333  | 117318     | 0                                                           | 0                   | 0             | 0              | 0           |
| mazatlan   | mx      | Sinaloa                                          | 11                | -106.4166670 | 23.2166670  | 354730     | 0                                                           | 1                   | 0             | 5              | 6           |
| mazyr      | by      | Dnieper - South Bug                              | 2                 | 29.2666667   | 52.0500000  | 112136     | 0                                                           | 0                   | 0             | 0              | 0           |
| mbandaka   | cd      | Cuvette Centrale                                 | 0                 | 18.2666670   | 0.0666670   | 184189     | 0                                                           | 0                   | 0             | 0              | 0           |
| mbeya      | tz      | Lake Rukwa                                       | 2                 | 33.4500000   | -8.9000000  | 291672     | 0                                                           | 0                   | 0             | 0              | 0           |
| mbouda     | cm      | Lower Niger - Benue                              | 2                 | 10.2500000   | 5.6333333   | 111690     | 0                                                           | 0                   | 0             | 0              | 0           |
| mbour      | sn      | Senegal - Gambia                                 | 4                 | -16.9666667  | 14.4000000  | 194682     | 1                                                           | 1                   | 0             | 0              | 2           |
| mbuji-mayi | cd      | Kasai                                            | 1                 | 23.6000000   | -6.1500000  | 874974     | 0                                                           | 0                   | 0             | 0              | 0           |
| mecca      | sa      | Southwestern Arabian Coast                       | 1                 | 39.8261110   | 21.4266670  | 1199659    | 0                                                           | 0                   | 0             | 0              | 0           |
| medan      | id      | Northern Central Sumatra - Western Malaysia      | 7                 | 98.6666670   | 3.5833330   | 1751190    | 0                                                           | 0                   | 0             | 1              | 1           |
| medea      | dz      | Mediterranean Northwest Africa                   | 2                 | 2.7500000    | 36.2675000  | 147710     | 0                                                           | 0                   | 0             | 0              | 0           |
| medellin   | co      | Magdalena - Sinu                                 | 15                | -75.5635910  | 6.2518400   | 2000001    | 2                                                           | 0                   | 0             | 2              | 4           |
| meiktila   | mm      | Sitang - Irawaddy                                | 0                 | 95.8666667   | 20.8666667  | 177464     | 0                                                           | 0                   | 0             | 0              | 0           |
| meilu      | cn      | Xi Yang                                          | 15                | 110.7659070  | 21.4571300  | 104168     | 0                                                           | 0                   | 0             | 0              | 0           |

Table S2 Cities and freshwater reptiles

| City           | Country | Freshwater Ecoregions of the World (FEOW) Region | Regional richness | Longitude    | Latitude    | Population | # of freshwater reptile species within 50 km of city centre |                     |               |                |             |
|----------------|---------|--------------------------------------------------|-------------------|--------------|-------------|------------|-------------------------------------------------------------|---------------------|---------------|----------------|-------------|
|                |         |                                                  |                   |              |             |            | Lizard species                                              | Crocodilian species | Snake species | Turtle species | All species |
| mejicanos      | sv      | Chiapas - Fonseca                                | 11                | -89.2130556  | 13.7402778  | 160319     | 1                                                           | 0                   | 0             | 1              | 2           |
| melaka         | my      | Northern Central Sumatra - Western Malaysia      | 7                 | 102.2405000  | 2.1960000   | 180675     | 1                                                           | 0                   | 0             | 0              | 1           |
| melbourne      | au      | Bass Strait Drainages                            | 8                 | 144.9634250  | -37.8139380 | 3730212    | 4                                                           | 0                   | 2             | 2              | 8           |
| memphis        | us      | Lower Mississippi                                | 33                | -90.0488889  | 35.1494444  | 641608     | 0                                                           | 0                   | 1             | 3              | 4           |
| mendoza        | ar      | Cuyan - Desaguadero                              | 0                 | -68.8271710  | -32.8908450 | 973047     | 0                                                           | 0                   | 0             | 0              | 0           |
| mentougou      | cn      | Lower Huang He                                   | 0                 | 116.0916670  | 39.9391670  | 197772     | 0                                                           | 0                   | 0             | 0              | 0           |
| mercedes       | ar      | Mar Chiquita - Salinas Grandes                   | 1                 | -65.4614050  | -33.6743590 | 126559     | 0                                                           | 0                   | 0             | 0              | 0           |
| mergui         | mm      | Lower & Middle Salween                           | 5                 | 98.6000000   | 12.4333333  | 173317     | 0                                                           | 0                   | 0             | 0              | 0           |
| merida         | mx      | Yucatan                                          | 15                | -89.6166670  | 20.9666670  | 717196     | 1                                                           | 1                   | 0             | 6              | 8           |
| mersin         | tr      | Southern Anatolia                                | 2                 | 34.6441670   | 36.7327780  | 612540     | 0                                                           | 0                   | 0             | 0              | 0           |
| mesa           | us      | Gila                                             | 10                | -111.8219444 | 33.4222222  | 449878     | 0                                                           | 0                   | 0             | 1              | 1           |
| mesquite       | us      | Sabine - Galveston                               | 29                | -96.5988889  | 32.7666667  | 131337     | 0                                                           | 1                   | 1             | 13             | 15          |
| messina        | it      | Italian Peninsula & Islands                      | 6                 | 15.5666670   | 38.1833330  | 237956     | 0                                                           | 0                   | 0             | 0              | 0           |
| metairie       | us      | Lower Mississippi                                | 33                | -90.1527778  | 29.9838889  | 142489     | 0                                                           | 1                   | 1             | 8              | 10          |
| metepec        | mx      | Lerma - Chapala                                  | 10                | -99.6077780  | 19.2536110  | 172990     | 0                                                           | 0                   | 0             | 2              | 2           |
| metro          | id      | Southern Sumatra - Western Java                  | 8                 | 105.3066670  | -5.1130560  | 149552     | 0                                                           | 0                   | 0             | 0              | 0           |
| metz           | fr      | Central & Western Europe                         | 13                | 6.1758750    | 49.1154610  | 128021     | 0                                                           | 0                   | 0             | 2              | 2           |
| mexicali       | mx      | Colorado                                         | 6                 | -115.4683330 | 32.6519440  | 597124     | 0                                                           | 0                   | 0             | 2              | 2           |
| mexico         | mx      | Lerma - Chapala                                  | 10                | -99.1386110  | 19.4341670  | 8720916    | 0                                                           | 0                   | 0             | 5              | 5           |
| meycauayan     | ph      | Northern Philippine Islands                      | 1                 | 120.9600000  | 14.7328000  | 184838     | 0                                                           | 0                   | 0             | 0              | 0           |
| mezhdurechensk | ru      | Ob                                               | 0                 | 88.0602780   | 53.6941670  | 101028     | 0                                                           | 0                   | 0             | 0              | 0           |
| miami          | us      | Florida Peninsula                                | 30                | -80.1938889  | 25.7738889  | 382894     | 1                                                           | 3                   | 0             | 11             | 15          |
| miandoab       | ir      | Orumiyeh                                         | 0                 | 46.1027000   | 36.9694000  | 132830     | 0                                                           | 0                   | 0             | 0              | 0           |
| mianyang       | cn      | Middle Yangtze                                   | 1                 | 104.7542350  | 31.4593390  | 264136     | 0                                                           | 0                   | 0             | 0              | 0           |

Table S2 Cities and freshwater reptiles

| City          | Country | Freshwater Ecoregions of the World (FEOW) Region | Regional richness | Longitude   | Latitude    | Population | # of freshwater reptile species within 50 km of city centre |                     |               |                |             |
|---------------|---------|--------------------------------------------------|-------------------|-------------|-------------|------------|-------------------------------------------------------------|---------------------|---------------|----------------|-------------|
|               |         |                                                  |                   |             |             |            | Lizard species                                              | Crocodilian species | Snake species | Turtle species | All species |
| miass         | ru      | Ob                                               | 0                 | 60.1083330  | 55.0450000  | 156563     | 0                                                           | 0                   | 0             | 0              | 0           |
| middelburg    | za      | Southern Temperate Highveld                      | 5                 | 29.4648210  | -25.7750710 | 154720     | 1                                                           | 1                   | 1             | 1              | 4           |
| middlesbrough | gb      | Central & Western Europe                         | 13                | -1.1627780  | 54.5727780  | 142708     | 0                                                           | 0                   | 0             | 0              | 0           |
| midrand       | za      | Southern Temperate Highveld                      | 5                 | 28.1377780  | -25.9636110 | 173009     | 0                                                           | 1                   | 1             | 2              | 4           |
| milagro       | ec      | North Andean Pacific Slopes - Rio Atrato         | 14                | -79.5333333 | -2.0666667  | 110093     | 0                                                           | 1                   | 0             | 1              | 2           |
| milan         | it      | Gulf of Venice Drainages                         | 8                 | 9.2000000   | 45.4666670  | 1156903    | 0                                                           | 0                   | 0             | 2              | 2           |
| milwaukee     | us      | Laurentian Great Lakes                           | 16                | -87.9063889 | 43.0388889  | 579180     | 0                                                           | 0                   | 0             | 5              | 5           |
| minatitlan    | mx      | Coatzacoalcos                                    | 6                 | -94.5166670 | 17.9833330  | 150902     | 1                                                           | 1                   | 0             | 0              | 2           |
| mingaora      | pk      | Indus Himalayan Foothills                        | 0                 | 72.3624900  | 34.7758400  | 227423     | 0                                                           | 0                   | 0             | 0              | 0           |
| mingshui      | cn      | Lower Huang He                                   | 0                 | 117.5000000 | 36.7166670  | 114858     | 0                                                           | 0                   | 0             | 0              | 0           |
| minna         | ng      | Lower Niger - Benue                              | 2                 | 6.5569440   | 9.6138890   | 291930     | 0                                                           | 0                   | 0             | 0              | 0           |
| minneapolis   | us      | Upper Mississippi                                | 20                | -93.2636111 | 44.9800000  | 367773     | 0                                                           | 0                   | 0             | 5              | 5           |
| minsk         | by      | Dnieper - South Bug                              | 2                 | 27.5666667  | 53.9000000  | 1742123    | 0                                                           | 0                   | 0             | 0              | 0           |
| miramar       | us      | Florida Peninsula                                | 30                | -80.2325000 | 25.9869444  | 112922     | 1                                                           | 3                   | 1             | 12             | 17          |
| miri          | my      | Northwestern Borneo                              | 9                 | 114.0089000 | 4.4148000   | 228227     | 0                                                           | 0                   | 0             | 0              | 0           |
| mirpur khas   | pk      | Lower & Middle Indus                             | 2                 | 69.0159000  | 25.5251000  | 215739     | 0                                                           | 0                   | 0             | 0              | 0           |
| mirzapur      | in      | Ganges Delta & Plain                             | 13                | 82.5833330  | 25.1500000  | 220051     | 0                                                           | 0                   | 0             | 0              | 0           |
| misato        | jp      | Honshu - Shikoku - Kyushu                        | 5                 | 139.8644860 | 35.8605970  | 129695     | 0                                                           | 0                   | 0             | 3              | 3           |
| mishima       | jp      | Honshu - Shikoku - Kyushu                        | 5                 | 138.9166670 | 35.1166670  | 113480     | 0                                                           | 0                   | 0             | 1              | 1           |
| miskolc       | hu      | Dniester - Lower Danube                          | 3                 | 20.7833330  | 48.1000000  | 179430     | 0                                                           | 0                   | 0             | 0              | 0           |
| misratah      | ly      | Sahara                                           | 1                 | 15.0905556  | 32.3783333  | 386120     | 0                                                           | 0                   | 0             | 0              | 0           |
| mitaka        | jp      | Honshu - Shikoku - Kyushu                        | 5                 | 139.5500000 | 35.6833330  | 178739     | 0                                                           | 0                   | 0             | 3              | 3           |
| mixco         | gt      | Chiapas - Fonseca                                | 11                | -90.6063890 | 14.6333330  | 460576     | 1                                                           | 0                   | 0             | 0              | 1           |
| miyakonojo    | jp      | Honshu - Shikoku - Kyushu                        | 5                 | 131.0666670 | 31.7333330  | 130995     | 0                                                           | 0                   | 0             | 0              | 0           |
| mobile        | us      | Mobile Bay                                       | 27                | -88.0430556 | 30.6941667  | 190274     | 0                                                           | 1                   | 1             | 6              | 8           |

Table S2 Cities and freshwater reptiles

| City             | Country | Freshwater Ecoregions of the World (FEOW) Region | Regional richness | Longitude    | Latitude    | Population | # of freshwater reptile species within 50 km of city centre |                     |               |                |             |
|------------------|---------|--------------------------------------------------|-------------------|--------------|-------------|------------|-------------------------------------------------------------|---------------------|---------------|----------------|-------------|
|                  |         |                                                  |                   |              |             |            | Lizard species                                              | Crocodilian species | Snake species | Turtle species | All species |
| modakeke         | ng      | Bight Drainages                                  | 7                 | 4.2666670    | 7.3833330   | 119537     | 1                                                           | 0                   | 0             | 0              | 1           |
| modena           | it      | Gulf of Venice Drainages                         | 8                 | 10.9166670   | 44.6666670  | 180641     | 0                                                           | 0                   | 0             | 2              | 2           |
| modesto          | us      | Sacramento - San Joaquin                         | 10                | -120.9958333 | 37.6391667  | 216008     | 0                                                           | 0                   | 0             | 2              | 2           |
| moers            | de      | Central & Western Europe                         | 13                | 6.6500000    | 51.4500000  | 109167     | 0                                                           | 0                   | 0             | 3              | 3           |
| moga             | in      | Lower & Middle Indus                             | 2                 | 75.1666670   | 30.8000000  | 130559     | 0                                                           | 0                   | 0             | 0              | 0           |
| mogadishu        | so      | Shebelle - Juba                                  | 0                 | 45.3666667   | 2.0666667   | 2590180    | 0                                                           | 0                   | 0             | 0              | 0           |
| moji das cruzeis | br      | Upper Parana                                     | 3                 | -46.1833330  | -23.5166670 | 325753     | 0                                                           | 0                   | 0             | 1              | 1           |
| mojokerto        | id      | Central & Eastern Java                           | 4                 | 112.4338000  | -7.4664000  | 112570     | 0                                                           | 0                   | 0             | 0              | 0           |
| mokolo           | cm      | Lower Niger - Benue                              | 2                 | 13.8027778   | 10.7402778  | 275750     | 0                                                           | 0                   | 0             | 0              | 0           |
| mombasa          | ke      | Tana, Athi & Coastal Drainages                   | 5                 | 39.6666667   | -4.0500000  | 799727     | 1                                                           | 0                   | 0             | 1              | 2           |
| monchengladbach  | de      | Central & Western Europe                         | 13                | 6.4333330    | 51.2000000  | 264969     | 0                                                           | 0                   | 0             | 7              | 7           |
| monclova         | mx      | Rio Salado                                       | 10                | -101.4166670 | 26.9000000  | 195772     | 0                                                           | 0                   | 0             | 1              | 1           |
| monrovia         | lr      | Southern Upper Guinea                            | 0                 | -10.8047222  | 6.3105556   | 935427     | 0                                                           | 0                   | 0             | 0              | 0           |
| montalban        | ph      | Northern Philippine Islands                      | 1                 | 121.1417000  | 14.7314000  | 134436     | 0                                                           | 0                   | 0             | 0              | 0           |
| monteria         | co      | Magdalena - Sinu                                 | 15                | -75.8814280  | 8.7479840   | 272424     | 1                                                           | 0                   | 0             | 2              | 3           |
| monterrey        | mx      | Rio San Juan (Mexico)                            | 8                 | -100.3166670 | 25.6666670  | 1122912    | 0                                                           | 0                   | 0             | 4              | 4           |
| montes claros    | br      | S. Francisco                                     | 0                 | -43.8666670  | -16.7166670 | 332384     | 0                                                           | 0                   | 0             | 0              | 0           |
| montevideo       | uy      | Lower Parana                                     | 9                 | -56.1708333  | -34.8580556 | 1305865    | 0                                                           | 0                   | 0             | 0              | 0           |
| montgomery       | us      | Mobile Bay                                       | 27                | -86.3000000  | 32.3666667  | 198325     | 0                                                           | 1                   | 1             | 4              | 6           |
| montpellier      | fr      | Cantabric Coast - Languedoc                      | 10                | 3.8772300    | 43.6109200  | 238887     | 0                                                           | 0                   | 0             | 2              | 2           |
| montreal         | ca      | St. Lawrence                                     | 10                | -73.5833330  | 45.5000000  | 3268513    | 0                                                           | 0                   | 0             | 3              | 3           |
| monywa           | mm      | Sitang - Irawaddy                                | 0                 | 95.1333333   | 22.1166667  | 182034     | 0                                                           | 0                   | 0             | 0              | 0           |
| monza            | it      | Gulf of Venice Drainages                         | 8                 | 9.2666670    | 45.5833330  | 120857     | 0                                                           | 0                   | 0             | 2              | 2           |
| mopti            | ml      | Inner Niger Delta                                | 0                 | -4.2000000   | 14.5000000  | 108790     | 0                                                           | 0                   | 0             | 0              | 0           |

Table S2 Cities and freshwater reptiles

| City          | Country | Freshwater Ecoregions of the World (FEOW) Region | Regional richness | Longitude    | Latitude    | Population | # of freshwater reptile species within 50 km of city centre |                     |               |                |             |
|---------------|---------|--------------------------------------------------|-------------------|--------------|-------------|------------|-------------------------------------------------------------|---------------------|---------------|----------------|-------------|
|               |         |                                                  |                   |              |             |            | Lizard species                                              | Crocodilian species | Snake species | Turtle species | All species |
| moradabad     | in      | Ganges Delta & Plain                             | 13                | 78.7833330   | 28.8333330  | 721210     | 0                                                           | 0                   | 0             | 0              | 0           |
| moratuwa      | lk      | Sri Lanka Wet Zone                               | 3                 | 79.8825000   | 6.7733333   | 185062     | 1                                                           | 0                   | 0             | 1              | 2           |
| morelia       | mx      | Lerma - Chapala                                  | 10                | -101.1166670 | 19.7000000  | 592820     | 0                                                           | 0                   | 0             | 2              | 2           |
| morena        | in      | Ganges Delta & Plain                             | 13                | 78.0000000   | 26.4969440  | 152020     | 0                                                           | 1                   | 0             | 0              | 1           |
| moreno valley | us      | Southern California Coastal - Baja California    | 12                | -117.2297222 | 33.9375000  | 168629     | 0                                                           | 0                   | 0             | 2              | 2           |
| moriguchi     | jp      | Honshu - Shikoku - Kyushu                        | 5                 | 135.5666670  | 34.7333330  | 148352     | 0                                                           | 0                   | 0             | 2              | 2           |
| mormugao      | in      | Western Ghats                                    | 4                 | 73.8000000   | 15.4000000  | 102355     | 0                                                           | 1                   | 0             | 0              | 1           |
| morogoro      | tz      | Coastal East Africa                              | 4                 | 37.6666667   | -6.8166667  | 250914     | 1                                                           | 0                   | 0             | 0              | 1           |
| morvi         | in      | Lower & Middle Indus                             | 2                 | 70.8333330   | 22.8166670  | 118021     | 0                                                           | 0                   | 0             | 0              | 0           |
| moscow        | ru      | Volga - Ural                                     | 0                 | 37.6155560   | 55.7522220  | 10381288   | 0                                                           | 0                   | 0             | 0              | 0           |
| moshi         | tz      | Pangani                                          | 1                 | 37.3333333   | -3.3500000  | 156970     | 0                                                           | 0                   | 0             | 0              | 0           |
| mossoro       | br      | Northeastern Caatinga & Coastal Drainages        | 1                 | -37.3447220  | -5.1913890  | 202010     | 0                                                           | 0                   | 0             | 0              | 0           |
| mostar        | ba      | Dalmatia                                         | 2                 | 17.8080556   | 43.3433333  | 104517     | 0                                                           | 0                   | 0             | 0              | 0           |
| mostoles      | es      | Western Iberia                                   | 6                 | -3.8628490   | 40.3209230  | 212504     | 0                                                           | 0                   | 0             | 3              | 3           |
| motihari      | in      | Ganges Delta & Plain                             | 13                | 84.9166670   | 26.6500000  | 112156     | 0                                                           | 0                   | 0             | 0              | 0           |
| moundou       | td      | Lake Chad                                        | 0                 | 16.0833333   | 8.5666667   | 135167     | 0                                                           | 0                   | 0             | 0              | 0           |
| mubi          | ng      | Lake Chad                                        | 0                 | 13.2643600   | 10.2676070  | 225721     | 0                                                           | 0                   | 0             | 0              | 0           |
| mudanjiang    | cn      | Songhua Jiang                                    | 0                 | 129.6000000  | 44.5833330  | 665915     | 0                                                           | 0                   | 0             | 0              | 0           |
| mufulira      | zm      | Zambeian Headwaters                              | 1                 | 28.2333333   | -12.5500000 | 120516     | 0                                                           | 0                   | 0             | 0              | 0           |
| mulheim       | de      | Central & Western Europe                         | 13                | 6.8833330    | 51.4333330  | 172779     | 0                                                           | 0                   | 0             | 3              | 3           |
| mulhouse      | fr      | Central & Western Europe                         | 13                | 7.3479320    | 47.7380820  | 111972     | 0                                                           | 0                   | 0             | 2              | 2           |
| multan        | pk      | Lower & Middle Indus                             | 2                 | 71.4752780   | 30.1955560  | 1437644    | 0                                                           | 0                   | 0             | 0              | 0           |
| munger        | in      | Ganges Delta & Plain                             | 13                | 86.4666670   | 25.3833330  | 203185     | 0                                                           | 0                   | 0             | 0              | 0           |
| munich        | de      | Upper Danube                                     | 5                 | 11.5833000   | 48.1500000  | 1246133    | 0                                                           | 0                   | 0             | 1              | 1           |

Table S2 Cities and freshwater reptiles

| City          | Country | Freshwater Ecoregions of the World (FEOW) Region | Regional richness | Longitude   | Latitude    | Population | # of freshwater reptile species within 50 km of city centre |                     |               |                |             |
|---------------|---------|--------------------------------------------------|-------------------|-------------|-------------|------------|-------------------------------------------------------------|---------------------|---------------|----------------|-------------|
|               |         |                                                  |                   |             |             |            | Lizard species                                              | Crocodilian species | Snake species | Turtle species | All species |
| munster       | de      | Central & Western Europe                         | 13                | 7.6333330   | 51.9666670  | 272452     | 0                                                           | 0                   | 0             | 1              | 1           |
| murcia        | es      | Southern Iberia                                  | 8                 | -1.1300420  | 37.9870410  | 410364     | 0                                                           | 0                   | 0             | 2              | 2           |
| muridke       | pk      | Lower & Middle Indus                             | 2                 | 73.8356870  | 31.7600270  | 164292     | 0                                                           | 0                   | 0             | 0              | 0           |
| murmansk      | ru      | Barents Sea Drainages                            | 0                 | 33.0925140  | 68.9791740  | 319266     | 0                                                           | 0                   | 0             | 0              | 0           |
| murom         | ru      | Volga - Ural                                     | 0                 | 42.0426000  | 55.5750000  | 126932     | 0                                                           | 0                   | 0             | 0              | 0           |
| murwara       | in      | Ganges Delta & Plain                             | 13                | 80.4000000  | 23.8500000  | 195877     | 0                                                           | 0                   | 0             | 0              | 0           |
| musashino     | jp      | Honshu - Shikoku - Kyushu                        | 5                 | 139.5594440 | 35.7061110  | 137480     | 0                                                           | 0                   | 0             | 3              | 3           |
| musoma        | tz      | Lake Victoria Basin                              | 5                 | 33.8000000  | -1.5000000  | 121125     | 0                                                           | 0                   | 0             | 0              | 0           |
| mutare        | zw      | Eastern Zimbabwe Highlands                       | 1                 | 32.6666667  | -18.9666667 | 253449     | 0                                                           | 1                   | 0             | 0              | 1           |
| muzaffargarh  | pk      | Lower & Middle Indus                             | 2                 | 71.1921290  | 30.0753700  | 165240     | 0                                                           | 0                   | 0             | 0              | 0           |
| muzaffarnagar | in      | Ganges Delta & Plain                             | 13                | 77.6833330  | 29.4666670  | 349741     | 0                                                           | 0                   | 0             | 0              | 0           |
| muzaffarpur   | in      | Ganges Delta & Plain                             | 13                | 85.4000000  | 26.1166670  | 333235     | 0                                                           | 0                   | 0             | 0              | 0           |
| mwanza        | tz      | Lake Victoria Basin                              | 5                 | 32.9000000  | -2.5166667  | 436811     | 0                                                           | 0                   | 0             | 0              | 0           |
| mwene-ditu    | cd      | Kasai                                            | 1                 | 23.4500000  | -7.0000000  | 189215     | 0                                                           | 0                   | 0             | 0              | 0           |
| my tho        | vn      | Mekong Delta                                     | 3                 | 106.3500000 | 10.3500000  | 122315     | 0                                                           | 0                   | 0             | 0              | 0           |
| myingyan      | mm      | Sitang - Irawaddy                                | 0                 | 95.3833333  | 21.4666667  | 141731     | 0                                                           | 0                   | 0             | 0              | 0           |
| mytishchi     | ru      | Volga - Ural                                     | 0                 | 37.7307570  | 55.9116300  | 160545     | 0                                                           | 0                   | 0             | 0              | 0           |
| nacala        | mz      | Coastal East Africa                              | 4                 | 40.6727778  | -14.5427778 | 224853     | 0                                                           | 0                   | 0             | 0              | 0           |
| nadiad        | in      | Namuda - Tapi                                    | 1                 | 72.8666670  | 22.7000000  | 202080     | 0                                                           | 1                   | 0             | 0              | 1           |
| nador         | ma      | Mediterranean Northwest Africa                   | 2                 | -2.9286600  | 35.1740410  | 157665     | 0                                                           | 0                   | 0             | 0              | 0           |
| naga          | ph      | Northern Philippine Islands                      | 1                 | 123.1841000 | 13.6232000  | 147115     | 0                                                           | 0                   | 0             | 0              | 0           |
| nagaoka       | jp      | Honshu - Shikoku - Kyushu                        | 5                 | 138.8500000 | 37.4500000  | 195320     | 0                                                           | 0                   | 0             | 0              | 0           |
| nagareyama    | jp      | Honshu - Shikoku - Kyushu                        | 5                 | 139.9333330 | 35.8833330  | 156003     | 0                                                           | 0                   | 0             | 3              | 3           |
| nagareyama    | jp      | Honshu - Shikoku - Kyushu                        | 5                 | 139.8913890 | 35.8505560  | 156003     | 0                                                           | 0                   | 0             | 3              | 3           |
| nagda         | in      | Ganges Delta & Plain                             | 13                | 75.4166670  | 23.4500000  | 103513     | 0                                                           | 0                   | 0             | 0              | 0           |

Table S2 Cities and freshwater reptiles

| City                | Country | Freshwater Ecoregions of the World (FEOW) Region | Regional richness | Longitude   | Latitude    | Population | # of freshwater reptile species within 50 km of city centre |                     |               |                |             |
|---------------------|---------|--------------------------------------------------|-------------------|-------------|-------------|------------|-------------------------------------------------------------|---------------------|---------------|----------------|-------------|
|                     |         |                                                  |                   |             |             |            | Lizard species                                              | Crocodilian species | Snake species | Turtle species | All species |
| nagercoil           | in      | Western Ghats                                    | 4                 | 77.4313890  | 8.1938890   | 213877     | 0                                                           | 0                   | 0             | 0              | 0           |
| nagoya              | jp      | Honshu - Shikoku - Kyushu                        | 5                 | 136.9067390 | 35.1801980  | 2191291    | 0                                                           | 0                   | 0             | 2              | 2           |
| nagpur              | in      | Northern Deccan Plateau                          | 2                 | 79.1000000  | 21.1500000  | 2228191    | 0                                                           | 0                   | 0             | 0              | 0           |
| naihati             | in      | Ganges Delta & Plain                             | 13                | 88.4169440  | 22.9027780  | 253245     | 0                                                           | 0                   | 0             | 0              | 0           |
| nairobi             | ke      | Tana, Athi & Coastal Drainages                   | 5                 | 36.8166667  | -1.2833333  | 2750561    | 1                                                           | 1                   | 1             | 1              | 4           |
| najran              | sa      | Arabian Interior                                 | 1                 | 44.1000000  | 17.4666670  | 125637     | 0                                                           | 0                   | 0             | 0              | 0           |
| nakhodka            | ru      | Sakhalin, Hokkaido, & Sikhote - Alin Coast       | 0                 | 132.8947220 | 42.8333330  | 146922     | 0                                                           | 0                   | 0             | 0              | 0           |
| nakhon pathom       | th      | Mae Khlong                                       | 4                 | 100.0442740 | 13.8196020  | 117927     | 1                                                           | 0                   | 0             | 2              | 3           |
| nakhon ratchasima   | th      | Khorat Plateau (Mekong)                          | 5                 | 102.0825500 | 14.9715960  | 208781     | 0                                                           | 0                   | 0             | 0              | 0           |
| nakhon si thammarat | th      | Malay Peninsula Eastern Slope                    | 12                | 99.9666670  | 8.4333330   | 120836     | 0                                                           | 0                   | 0             | 0              | 0           |
| nakuru              | ke      | Southern Eastern Rift                            | 4                 | 36.0666667  | -0.2833333  | 259934     | 0                                                           | 0                   | 0             | 0              | 0           |
| nalchik             | ru      | Western Caspian Drainages                        | 0                 | 43.6188890  | 43.4980560  | 282916     | 0                                                           | 0                   | 0             | 0              | 0           |
| nalgonda            | in      | Southern Deccan Plateau                          | 0                 | 79.2666670  | 17.0500000  | 121839     | 0                                                           | 0                   | 0             | 0              | 0           |
| nam dinh            | vn      | Song Hong                                        | 1                 | 106.1666670 | 20.4166670  | 193507     | 0                                                           | 0                   | 0             | 0              | 0           |
| namangan            | uz      | Northern Central Asian Highlands                 | 1                 | 71.6725000  | 40.9952778  | 432479     | 0                                                           | 0                   | 0             | 0              | 0           |
| nampula             | mz      | Coastal East Africa                              | 4                 | 39.2647222  | -15.1197222 | 388526     | 0                                                           | 0                   | 0             | 0              | 0           |
| namur               | be      | Central & Western Europe                         | 13                | 4.8666670   | 50.4666670  | 106284     | 0                                                           | 0                   | 0             | 1              | 1           |
| nancha              | cn      | Songhua Jiang                                    | 0                 | 129.2666670 | 47.1333330  | 121367     | 0                                                           | 0                   | 0             | 0              | 0           |
| nanchang            | cn      | Lower Yangtze                                    | 4                 | 115.9333330 | 28.5500000  | 1871351    | 0                                                           | 0                   | 0             | 0              | 0           |
| nanchong            | cn      | Middle Yangtze                                   | 1                 | 106.1029380 | 30.7757570  | 204368     | 0                                                           | 0                   | 0             | 0              | 0           |
| nancy               | fr      | Central & Western Europe                         | 13                | 6.1877560   | 48.6921100  | 106857     | 0                                                           | 0                   | 0             | 0              | 0           |
| nanded              | in      | Northern Deccan Plateau                          | 2                 | 77.3333330  | 19.1500000  | 485150     | 0                                                           | 0                   | 0             | 0              | 0           |
| nandurbar           | in      | Namuda - Tapi                                    | 1                 | 74.2500000  | 21.3666670  | 100711     | 0                                                           | 0                   | 0             | 0              | 0           |
| nandyal             | in      | Southern Deccan Plateau                          | 0                 | 78.4833330  | 15.4833330  | 165355     | 0                                                           | 0                   | 0             | 0              | 0           |

Table S2 Cities and freshwater reptiles

| City        | Country | Freshwater Ecoregions of the World (FEOW) Region | Regional richness | Longitude   | Latitude   | Population | # of freshwater reptile species within 50 km of city centre |                     |               |                |             |
|-------------|---------|--------------------------------------------------|-------------------|-------------|------------|------------|-------------------------------------------------------------|---------------------|---------------|----------------|-------------|
|             |         |                                                  |                   |             |            |            | Lizard species                                              | Crocodilian species | Snake species | Turtle species | All species |
| nangloi jat | in      | Ganges Delta & Plain                             | 13                | 77.0666670  | 28.6833330 | 194381     | 0                                                           | 0                   | 0             | 0              | 0           |
| nanjing     | cn      | Lower Yangtze                                    | 4                 | 118.7777780 | 32.0616670 | 3087010    | 0                                                           | 0                   | 0             | 1              | 1           |
| nanning     | cn      | Xi Yang                                          | 15                | 108.3166670 | 22.8166670 | 803788     | 0                                                           | 0                   | 0             | 0              | 0           |
| nanpiao     | cn      | Liao He                                          | 0                 | 120.7479230 | 41.0982180 | 157044     | 0                                                           | 0                   | 0             | 0              | 0           |
| nantes      | fr      | Central & Western Europe                         | 13                | -1.5523790  | 47.2165090 | 284677     | 0                                                           | 0                   | 0             | 0              | 0           |
| nantong     | cn      | Lower Yangtze                                    | 4                 | 120.8747220 | 32.0302780 | 666251     | 0                                                           | 0                   | 0             | 0              | 0           |
| nantou      | tw      | Western Taiwan                                   | 2                 | 120.6847222 | 23.9088889 | 107219     | 0                                                           | 0                   | 0             | 3              | 3           |
| nanyang     | cn      | Lower Yangtze                                    | 4                 | 112.5327780 | 32.9947220 | 251532     | 0                                                           | 0                   | 0             | 0              | 0           |
| naperville  | us      | Upper Mississippi                                | 20                | -88.1472222 | 41.7858333 | 143850     | 0                                                           | 0                   | 0             | 8              | 8           |
| naples      | it      | Italian Peninsula & Islands                      | 6                 | 14.2500000  | 40.8333330 | 981284     | 0                                                           | 0                   | 0             | 0              | 0           |
| narashino   | jp      | Honshu - Shikoku - Kyushu                        | 5                 | 140.0333330 | 35.6833330 | 156085     | 0                                                           | 0                   | 0             | 3              | 3           |
| narayanganj | bd      | Ganges Delta & Plain                             | 13                | 90.5011111  | 23.6233333 | 223773     | 0                                                           | 0                   | 0             | 0              | 0           |
| narita      | jp      | Honshu - Shikoku - Kyushu                        | 5                 | 140.3166670 | 35.7833330 | 100644     | 0                                                           | 0                   | 0             | 1              | 1           |
| narsingdi   | bd      | Ganges Delta & Plain                             | 13                | 90.7180556  | 23.9208333 | 281110     | 0                                                           | 0                   | 0             | 0              | 0           |
| nashville   | us      | Cumberland                                       | 9                 | -86.7844444 | 36.1658333 | 530852     | 0                                                           | 0                   | 1             | 5              | 6           |
| nassau      | bs      | Bahama Archipelago                               | 1                 | -77.3500000 | 25.0833333 | 227936     | 0                                                           | 0                   | 0             | 0              | 0           |
| natal       | br      | Northeastern Caatinga & Coastal Drainages        | 1                 | -35.2166670 | -5.7833330 | 763057     | 0                                                           | 0                   | 0             | 0              | 0           |
| naucalpan   | mx      | Lerma - Chapala                                  | 10                | -99.2383330 | 19.4794440 | 846222     | 0                                                           | 0                   | 0             | 5              | 5           |
| navadwip    | in      | Ganges Delta & Plain                             | 13                | 88.3666670  | 23.4166670 | 111134     | 0                                                           | 0                   | 0             | 0              | 0           |
| navoi       | uz      | Middle Amu Darya                                 | 1                 | 65.3791667  | 40.0844444 | 129734     | 0                                                           | 0                   | 0             | 0              | 0           |
| navsari     | in      | Namuda - Tapi                                    | 1                 | 72.9166670  | 20.8500000 | 136204     | 0                                                           | 0                   | 0             | 0              | 0           |
| nawabganj   | bd      | Ganges Delta & Plain                             | 13                | 88.2833333  | 24.6000000 | 142373     | 0                                                           | 0                   | 0             | 0              | 0           |
| nawabshah   | pk      | Lower & Middle Indus                             | 2                 | 68.4095540  | 26.2483340 | 229590     | 0                                                           | 0                   | 0             | 0              | 0           |
| nazilli     | tr      | Western Anatolia                                 | 5                 | 28.3222490  | 37.9163090 | 119430     | 0                                                           | 0                   | 0             | 0              | 0           |
| nazran      | ru      | Western Caspian Drainages                        | 0                 | 44.7732310  | 43.2259670 | 164142     | 0                                                           | 0                   | 0             | 0              | 0           |

Table S2 Cities and freshwater reptiles

| City                | Country | Freshwater Ecoregions of the World (FEOW) Region   | Regional richness | Longitude   | Latitude    | Population | # of freshwater reptile species within 50 km of city centre |                     |               |                |             |
|---------------------|---------|----------------------------------------------------|-------------------|-------------|-------------|------------|-------------------------------------------------------------|---------------------|---------------|----------------|-------------|
|                     |         |                                                    |                   |             |             |            | Lizard species                                              | Crocodilian species | Snake species | Turtle species | All species |
| nazret              | et      | Northern Eastern Rift                              | 1                 | 39.2666670  | 8.5500000   | 214034     | 0                                                           | 0                   | 0             | 0              | 0           |
| neftkamsk           | ru      | Volga - Ural                                       | 0                 | 54.2703190  | 56.0919910  | 126807     | 0                                                           | 0                   | 0             | 0              | 0           |
| nefteyugansk        | ru      | Ob                                                 | 0                 | 72.7000000  | 61.0833330  | 112634     | 0                                                           | 0                   | 0             | 0              | 0           |
| negombo             | lk      | Sri Lanka Dry Zone                                 | 5                 | 79.8358333  | 7.2086111   | 137246     | 1                                                           | 0                   | 0             | 1              | 2           |
| nehe                | cn      | Songhua Jiang                                      | 0                 | 124.8333330 | 48.4833330  | 108253     | 0                                                           | 0                   | 0             | 0              | 0           |
| nejjiang            | cn      | Middle Yangtze                                     | 1                 | 105.0621600 | 29.5835360  | 546854     | 0                                                           | 0                   | 0             | 0              | 0           |
| neiva               | co      | Magdalena - Sinu                                   | 15                | -75.2818850 | 2.9272990   | 352859     | 0                                                           | 0                   | 0             | 0              | 0           |
| nelspruit           | za      | Southern Temperate Highveld                        | 5                 | 30.9703330  | -25.4744820 | 110170     | 1                                                           | 1                   | 0             | 2              | 4           |
| netanya             | il      | Coastal Levant                                     | 1                 | 34.8599180  | 32.3329150  | 172405     | 0                                                           | 0                   | 0             | 1              | 1           |
| neuquen             | ar      | Patagonia                                          | 0                 | -68.0591020 | -38.9516060 | 359037     | 0                                                           | 0                   | 0             | 0              | 0           |
| neuss               | de      | Central & Western Europe                           | 13                | 6.6833330   | 51.2000000  | 152975     | 0                                                           | 0                   | 0             | 6              | 6           |
| nevinomyssk         | ru      | Kuban                                              | 0                 | 41.9444000  | 44.6333000  | 134347     | 0                                                           | 0                   | 0             | 0              | 0           |
| new delhi           | in      | Ganges Delta & Plain                               | 13                | 77.2000000  | 28.6000000  | 10928270   | 0                                                           | 0                   | 0             | 0              | 0           |
| new haven           | us      | Northeast US & Southeast Canada Atlantic Drainages | 18                | -72.9286111 | 41.3080556  | 124922     | 0                                                           | 0                   | 0             | 7              | 7           |
| new orleans         | us      | Lower Mississippi                                  | 33                | -90.0750000 | 29.9544444  | 459336     | 0                                                           | 1                   | 1             | 8              | 10          |
| new york            | us      | Northeast US & Southeast Canada Atlantic Drainages | 18                | -74.0063889 | 40.7141667  | 8107916    | 0                                                           | 0                   | 0             | 12             | 12          |
| newark              | us      | Northeast US & Southeast Canada Atlantic Drainages | 18                | -74.1727778 | 40.7355556  | 280123     | 0                                                           | 0                   | 0             | 12             | 12          |
| newcastle           | au      | Eastern Coastal Australia                          | 19                | 151.7844850 | -32.9277920 | 497961     | 0                                                           | 0                   | 0             | 1              | 1           |
| newcastle           | za      | Southern Temperate Highveld                        | 5                 | 29.9318030  | -27.7579560 | 404849     | 0                                                           | 0                   | 0             | 1              | 1           |
| newcastle upon tyne | gb      | Central & Western Europe                           | 13                | -1.6194440  | 54.9880560  | 192382     | 0                                                           | 0                   | 0             | 0              | 0           |
| newport             | gb      | Northern British Isles                             | 1                 | -2.9833330  | 51.5833330  | 117327     | 0                                                           | 0                   | 0             | 2              | 2           |
| newport news        | us      | Appalachian Piedmont                               | 26                | -76.4283333 | 36.9786111  | 183444     | 0                                                           | 0                   | 1             | 11             | 12          |
| neyagawa            | jp      | Honshu - Shikoku - Kyushu                          | 5                 | 135.6333330 | 34.7500000  | 245112     | 0                                                           | 0                   | 0             | 2              | 2           |
| neyshabur           | ir      | Kavir & Lut Deserts                                | 0                 | 58.7957550  | 36.2132880  | 220954     | 0                                                           | 0                   | 0             | 0              | 0           |

Table S2 Cities and freshwater reptiles

| City             | Country | Freshwater Ecoregions of the World (FEOW) Region | Regional richness | Longitude   | Latitude    | Population | # of freshwater reptile species within 50 km of city centre |                     |               |                |             |
|------------------|---------|--------------------------------------------------|-------------------|-------------|-------------|------------|-------------------------------------------------------------|---------------------|---------------|----------------|-------------|
|                  |         |                                                  |                   |             |             |            | Lizard species                                              | Crocodilian species | Snake species | Turtle species | All species |
| neyveli          | in      | Southeastern Ghats                               | 3                 | 79.4833330  | 11.5333330  | 131213     | 0                                                           | 0                   | 0             | 0              | 0           |
| nezahualcoyotl   | mx      | Lerma - Chapala                                  | 10                | -99.0330560 | 19.4136110  | 1232565    | 0                                                           | 0                   | 0             | 5              | 5           |
| ngaoundere       | cm      | Lake Chad                                        | 0                 | 13.5833333  | 7.3166667   | 231376     | 0                                                           | 0                   | 0             | 0              | 0           |
| nguru            | ng      | Lake Chad                                        | 0                 | 10.4526000  | 12.8791000  | 111022     | 0                                                           | 0                   | 0             | 0              | 0           |
| nha trang        | vn      | Southern Annam                                   | 2                 | 109.1833330 | 12.2500000  | 283452     | 0                                                           | 0                   | 0             | 0              | 0           |
| niamey           | ne      | Lower Niger - Benue                              | 2                 | 1.7833333   | 13.6666667  | 774245     | 0                                                           | 0                   | 0             | 0              | 0           |
| niamey           | ne      | Lower Niger - Benue                              | 2                 | 2.1166667   | 13.5166667  | 774245     | 0                                                           | 0                   | 0             | 0              | 0           |
| nice             | fr      | Italian Peninsula & Islands                      | 6                 | 7.2595200   | 43.7136440  | 341621     | 0                                                           | 0                   | 0             | 1              | 1           |
| nicolas romero   | mx      | Lerma - Chapala                                  | 10                | -99.3130560 | 19.6219440  | 245394     | 0                                                           | 0                   | 0             | 4              | 4           |
| nigel            | za      | Southern Temperate Highveld                      | 5                 | 28.4771320  | -26.4313760 | 140649     | 0                                                           | 1                   | 0             | 1              | 2           |
| niigata          | jp      | Honshu - Shikoku - Kyushu                        | 5                 | 139.0236110 | 37.9022220  | 505276     | 0                                                           | 0                   | 0             | 0              | 0           |
| niihama          | jp      | Honshu - Shikoku - Kyushu                        | 5                 | 133.3167220 | 33.9593260  | 123061     | 0                                                           | 0                   | 0             | 1              | 1           |
| niiza            | jp      | Honshu - Shikoku - Kyushu                        | 5                 | 139.5253910 | 35.7979150  | 153591     | 0                                                           | 0                   | 0             | 3              | 3           |
| nijmegen         | nl      | Central & Western Europe                         | 13                | 5.8666670   | 51.8333330  | 158707     | 0                                                           | 0                   | 0             | 1              | 1           |
| nilopolis        | br      | Fluminense                                       | 1                 | -43.4197920 | -22.8084870 | 147283     | 0                                                           | 0                   | 0             | 0              | 0           |
| nimes            | fr      | Cantabric Coast - Languedoc                      | 10                | 4.3596230   | 43.8337780  | 137532     | 0                                                           | 0                   | 0             | 2              | 2           |
| ningbo           | cn      | Coastal Fujian - Zeijang                         | 1                 | 121.5494530 | 29.8781860  | 719867     | 0                                                           | 0                   | 0             | 0              | 0           |
| nis              | rs      | Dniester - Lower Danube                          | 3                 | 21.9033330  | 43.3247220  | 173775     | 0                                                           | 0                   | 0             | 0              | 0           |
| nishinomiya      | jp      | Honshu - Shikoku - Kyushu                        | 5                 | 135.3333330 | 34.7166670  | 468929     | 0                                                           | 0                   | 0             | 2              | 2           |
| nishio           | jp      | Honshu - Shikoku - Kyushu                        | 5                 | 137.0500000 | 34.8666670  | 103338     | 0                                                           | 0                   | 0             | 2              | 2           |
| niteroi          | br      | Fluminense                                       | 1                 | -43.1303010 | -22.9021400 | 456461     | 0                                                           | 0                   | 0             | 0              | 0           |
| nizamabad        | in      | Northern Deccan Plateau                          | 2                 | 78.1166670  | 18.6666670  | 305472     | 0                                                           | 0                   | 0             | 0              | 0           |
| nizhnেকamsk      | ru      | Volga - Ural                                     | 0                 | 51.8244740  | 55.6365710  | 234301     | 0                                                           | 0                   | 0             | 0              | 0           |
| nizhnevartovsk   | ru      | Ob                                               | 0                 | 76.5531000  | 60.9344000  | 244940     | 0                                                           | 0                   | 0             | 0              | 0           |
| nizhniy novgorod | ru      | Volga - Ural                                     | 0                 | 44.0075000  | 56.3269440  | 1284176    | 0                                                           | 0                   | 0             | 0              | 0           |

Table S2 Cities and freshwater reptiles

| City                     | Country | Freshwater Ecoregions of the World (FEOW) Region | Regional richness | Longitude    | Latitude    | Population | # of freshwater reptile species within 50 km of city centre |                     |               |                |             |
|--------------------------|---------|--------------------------------------------------|-------------------|--------------|-------------|------------|-------------------------------------------------------------|---------------------|---------------|----------------|-------------|
|                          |         |                                                  |                   |              |             |            | Lizard species                                              | Crocodilian species | Snake species | Turtle species | All species |
| nizhniy tagil            | ru      | Ob                                               | 0                 | 59.9650000   | 57.9194440  | 381121     | 0                                                           | 0                   | 0             | 0              | 0           |
| nkongsamba               | cm      | Western Equatorial Crater Lakes                  | 0                 | 9.9325000    | 4.9533333   | 117076     | 0                                                           | 0                   | 0             | 0              | 0           |
| nkpor                    | ng      | Lower Niger - Benue                              | 2                 | 6.8445850    | 6.1516410   | 103741     | 0                                                           | 0                   | 0             | 0              | 0           |
| nnewi                    | ng      | Niger Delta                                      | 0                 | 6.9147750    | 6.0198640   | 194002     | 0                                                           | 0                   | 0             | 0              | 0           |
| nobeoka                  | jp      | Honshu - Shikoku - Kyushu                        | 5                 | 131.6666670  | 32.5833330  | 121951     | 0                                                           | 0                   | 0             | 0              | 0           |
| noda                     | jp      | Honshu - Shikoku - Kyushu                        | 5                 | 139.8580560  | 35.9411110  | 121414     | 0                                                           | 0                   | 0             | 3              | 3           |
| nogales                  | mx      | Gila                                             | 10                | -110.9333330 | 31.3333330  | 185890     | 0                                                           | 0                   | 0             | 3              | 3           |
| noginsk                  | ru      | Volga - Ural                                     | 0                 | 38.4437990   | 55.8664660  | 115981     | 0                                                           | 0                   | 0             | 0              | 0           |
| nonthaburi               | th      | Chao Phraya                                      | 12                | 100.5134170  | 13.8621670  | 375826     | 1                                                           | 0                   | 0             | 7              | 8           |
| norfolk                  | us      | Appalachian Piedmont                             | 26                | -76.2855556  | 36.8466667  | 246216     | 0                                                           | 1                   | 1             | 11             | 13          |
| norilsk                  | ru      | Taimyr                                           | 0                 | 88.2027000   | 69.3535000  | 127504     | 0                                                           | 0                   | 0             | 0              | 0           |
| norman                   | us      | US Southern Plains                               | 20                | -97.4391667  | 35.2225000  | 101742     | 0                                                           | 0                   | 0             | 9              | 9           |
| north las vegas          | us      | Vegas - Virgin                                   | 2                 | -115.1166667 | 36.1988889  | 165416     | 0                                                           | 0                   | 0             | 3              | 3           |
| north shore              | nz      | New Zealand                                      | 2                 | 174.7500000  | -36.8000000 | 207865     | 0                                                           | 0                   | 0             | 1              | 1           |
| northampton              | gb      | Central & Western Europe                         | 13                | -0.8833330   | 52.2500000  | 197323     | 0                                                           | 0                   | 0             | 1              | 1           |
| norwalk                  | us      | Southern California Coastal - Baja California    | 12                | -118.0808333 | 33.9022222  | 109111     | 0                                                           | 0                   | 0             | 8              | 8           |
| norwich                  | gb      | Central & Western Europe                         | 13                | 1.3000000    | 52.6333330  | 177636     | 0                                                           | 0                   | 0             | 1              | 1           |
| nossa senhora do socorro | br      | Northeastern Mata Atlantica                      | 1                 | -37.1166670  | -10.8666670 | 163996     | 0                                                           | 0                   | 0             | 0              | 0           |
| nottingham               | gb      | Central & Western Europe                         | 13                | -1.1666670   | 52.9666670  | 246655     | 0                                                           | 0                   | 0             | 1              | 1           |
| nouakchott               | mr      | Dry Sahel                                        | 1                 | -15.9752778  | 18.0863889  | 709835     | 0                                                           | 0                   | 0             | 0              | 0           |
| nova friburgo            | br      | Paraiba do Sul                                   | 0                 | -42.5333330  | -22.2666670 | 153363     | 0                                                           | 1                   | 0             | 0              | 1           |
| nova iguacu              | br      | Fluminense                                       | 1                 | -43.4318870  | -22.7591880 | 1002129    | 0                                                           | 0                   | 0             | 0              | 0           |
| novara                   | it      | Gulf of Venice Drainages                         | 8                 | 8.6333330    | 45.4666670  | 105903     | 0                                                           | 0                   | 0             | 2              | 2           |
| novi sad                 | rs      | Dniester - Lower Danube                          | 3                 | 19.8369440   | 45.2516670  | 194405     | 0                                                           | 0                   | 0             | 1              | 1           |

Table S2 Cities and freshwater reptiles

| City               | Country | Freshwater Ecoregions of the World (FEOW) Region | Regional richness | Longitude    | Latitude    | Population | # of freshwater reptile species within 50 km of city centre |                     |               |                |             |
|--------------------|---------|--------------------------------------------------|-------------------|--------------|-------------|------------|-------------------------------------------------------------|---------------------|---------------|----------------|-------------|
|                    |         |                                                  |                   |              |             |            | Lizard species                                              | Crocodilian species | Snake species | Turtle species | All species |
| novo hamburgo      | br      | Laguna dos Patos                                 | 2                 | -51.1333330  | -29.6833330 | 253846     | 0                                                           | 0                   | 0             | 0              | 0           |
| novocheboksarsk    | ru      | Volga - Ural                                     | 0                 | 47.4775500   | 56.1109470  | 128470     | 0                                                           | 0                   | 0             | 0              | 0           |
| novocherkassk      | ru      | Don                                              | 1                 | 40.0913250   | 47.4201750  | 166976     | 0                                                           | 0                   | 0             | 0              | 0           |
| novokuznetsk       | ru      | Ob                                               | 0                 | 87.1099000   | 53.7557000  | 539622     | 0                                                           | 0                   | 0             | 0              | 0           |
| novomoskovsk       | ru      | Volga - Ural                                     | 0                 | 38.2846000   | 54.0105000  | 130984     | 0                                                           | 0                   | 0             | 0              | 0           |
| novorossiysk       | ru      | Western Transcaucasia                            | 0                 | 37.7675240   | 44.7243860  | 241860     | 0                                                           | 0                   | 0             | 0              | 0           |
| novosibirsk        | ru      | Ob                                               | 0                 | 82.9346000   | 55.0415000  | 1419016    | 0                                                           | 0                   | 0             | 0              | 0           |
| novotroitsk        | ru      | Volga - Ural                                     | 0                 | 58.3266530   | 51.2030120  | 106187     | 0                                                           | 0                   | 0             | 0              | 0           |
| nsukka             | ng      | Lower Niger - Benue                              | 2                 | 7.3927000    | 6.8561000   | 111026     | 0                                                           | 0                   | 0             | 0              | 0           |
| nueva san salvador | sv      | Chiapas - Fonseca                                | 11                | -89.2797222  | 13.6769444  | 124702     | 1                                                           | 0                   | 0             | 1              | 2           |
| nuevo laredo       | mx      | Lower Rio Grande - Bravo                         | 14                | -99.5166670  | 27.5000000  | 349562     | 0                                                           | 0                   | 0             | 2              | 2           |
| nukus              | uz      | Aral Sea Drainages                               | 0                 | 59.6102778   | 42.4530556  | 230020     | 0                                                           | 0                   | 0             | 0              | 0           |
| numazu             | jp      | Honshu - Shikoku - Kyushu                        | 5                 | 138.8666670  | 35.1000000  | 204320     | 0                                                           | 0                   | 0             | 1              | 1           |
| nuremberg          | de      | Central & Western Europe                         | 13                | 11.0683330   | 49.4477780  | 497593     | 0                                                           | 0                   | 0             | 2              | 2           |
| nyiregyhaza        | hu      | Dniester - Lower Danube                          | 3                 | 21.7166670   | 47.9500000  | 116809     | 0                                                           | 0                   | 0             | 0              | 0           |
| nzerekore          | gn      | Southern Upper Guinea                            | 0                 | -8.8238889   | 7.7472222   | 132842     | 0                                                           | 1                   | 0             | 0              | 1           |
| oakland            | us      | Sacramento - San Joaquin                         | 10                | -122.2697222 | 37.8044444  | 394579     | 0                                                           | 0                   | 0             | 7              | 7           |
| oaxaca             | mx      | Sierra Madre del Sur                             | 12                | -96.7166670  | 17.0500000  | 262574     | 0                                                           | 0                   | 0             | 1              | 1           |
| oberhausen         | de      | Central & Western Europe                         | 13                | 6.8500000    | 51.4666670  | 220916     | 0                                                           | 0                   | 0             | 3              | 3           |
| obihiro            | jp      | Sakhalin, Hokkaido, & Sikhote - Alin Coast       | 0                 | 143.2044440  | 42.9172220  | 173892     | 0                                                           | 0                   | 0             | 0              | 0           |
| obninsk            | ru      | Volga - Ural                                     | 0                 | 36.6100640   | 55.0968060  | 107394     | 0                                                           | 0                   | 0             | 0              | 0           |
| obosi              | ng      | Niger Delta                                      | 0                 | 6.8184320    | 6.0969670   | 136753     | 0                                                           | 0                   | 0             | 0              | 0           |
| obregon            | mx      | Sonora                                           | 9                 | -109.9333330 | 27.4833330  | 258174     | 0                                                           | 0                   | 0             | 1              | 1           |
| obuasi             | gh      | Ashanti                                          | 1                 | -1.6666667   | 6.2000000   | 119063     | 0                                                           | 0                   | 0             | 0              | 0           |

Table S2 Cities and freshwater reptiles

| City            | Country | Freshwater Ecoregions of the World (FEOW) Region | Regional richness | Longitude    | Latitude   | Population | # of freshwater reptile species within 50 km of city centre |                     |               |                |             |
|-----------------|---------|--------------------------------------------------|-------------------|--------------|------------|------------|-------------------------------------------------------------|---------------------|---------------|----------------|-------------|
|                 |         |                                                  |                   |              |            |            | Lizard species                                              | Crocodilian species | Snake species | Turtle species | All species |
| oceanside       | us      | Southern California Coastal - Baja California    | 12                | -117.3786111 | 33.1958333 | 170340     | 0                                                           | 0                   | 0             | 3              | 3           |
| ocumare del tuy | ve      | South America Caribbean Drainages - Trinidad     | 6                 | -66.7716667  | 10.1216667 | 166112     | 0                                                           | 0                   | 0             | 0              | 0           |
| odawara         | jp      | Honshu - Shikoku - Kyushu                        | 5                 | 139.1597220  | 35.2555560 | 203038     | 0                                                           | 0                   | 0             | 1              | 1           |
| odense          | dk      | Central & Western Europe                         | 13                | 10.3949350   | 55.3934750 | 145931     | 0                                                           | 0                   | 0             | 0              | 0           |
| odesa           | ua      | Dnieper - South Bug                              | 2                 | 30.7385510   | 46.4639340 | 1001553    | 0                                                           | 0                   | 0             | 0              | 0           |
| odintsovo       | ru      | Volga - Ural                                     | 0                 | 37.2777340   | 55.6779760 | 137043     | 0                                                           | 0                   | 0             | 0              | 0           |
| offa            | ng      | Lower Niger - Benue                              | 2                 | 4.7166670    | 8.1500000  | 113841     | 0                                                           | 0                   | 0             | 0              | 0           |
| offenbach       | de      | Central & Western Europe                         | 13                | 8.7666670    | 50.1000000 | 120641     | 0                                                           | 0                   | 0             | 7              | 7           |
| ogaki           | jp      | Honshu - Shikoku - Kyushu                        | 5                 | 136.6166670  | 35.3500000 | 150572     | 0                                                           | 0                   | 0             | 1              | 1           |
| ogbomosho       | ng      | Bight Drainages                                  | 7                 | 4.2666670    | 8.1333330  | 861303     | 0                                                           | 0                   | 0             | 0              | 0           |
| okara           | pk      | Lower & Middle Indus                             | 2                 | 73.4458330   | 30.8080560 | 223714     | 0                                                           | 0                   | 0             | 0              | 0           |
| okazaki         | jp      | Honshu - Shikoku - Kyushu                        | 5                 | 137.1500000  | 34.9166670 | 352364     | 0                                                           | 0                   | 0             | 2              | 2           |
| okinawa         | jp      | Honshu - Shikoku - Kyushu                        | 5                 | 127.8013890  | 26.3358330 | 125485     | 0                                                           | 0                   | 0             | 2              | 2           |
| oklahoma city   | us      | US Southern Plains                               | 20                | -97.5161111  | 35.4675000 | 532950     | 0                                                           | 0                   | 0             | 9              | 9           |
| okrika          | ng      | Niger Delta                                      | 0                 | 7.0848770    | 4.7415890  | 133284     | 0                                                           | 0                   | 0             | 0              | 0           |
| oktyabrskiy     | ru      | Volga - Ural                                     | 0                 | 53.4710310   | 54.4814700 | 109498     | 0                                                           | 0                   | 0             | 0              | 0           |
| olathe          | us      | Middle Missouri                                  | 12                | -94.8188889  | 38.8813889 | 113647     | 0                                                           | 0                   | 0             | 6              | 6           |
| oldenburg       | de      | Central & Western Europe                         | 13                | 8.2000000    | 53.1666670 | 160347     | 0                                                           | 0                   | 0             | 1              | 1           |
| oldham          | gb      | Central & Western Europe                         | 13                | -2.1166670   | 53.5500000 | 104783     | 0                                                           | 0                   | 0             | 1              | 1           |
| olinda          | br      | Northeastern Caatinga & Coastal Drainages        | 1                 | -34.8500000  | -8.0166670 | 366761     | 0                                                           | 0                   | 0             | 0              | 0           |
| olomouc         | cz      | Upper Danube                                     | 5                 | 17.2511900   | 49.5940400 | 102792     | 0                                                           | 0                   | 0             | 0              | 0           |
| olongapo        | ph      | Northern Philippine Islands                      | 1                 | 120.2868000  | 14.8373000 | 219999     | 0                                                           | 0                   | 0             | 0              | 0           |
| olsztyn         | pl      | Central & Western Europe                         | 13                | 20.4941620   | 53.7799490 | 171803     | 0                                                           | 0                   | 0             | 1              | 1           |
| omaha           | us      | Middle Missouri                                  | 12                | -95.9375000  | 41.2586111 | 413487     | 0                                                           | 0                   | 0             | 2              | 2           |

Table S2 Cities and freshwater reptiles

| City           | Country | Freshwater Ecoregions of the World (FEOW) Region | Regional richness | Longitude    | Latitude    | Population | # of freshwater reptile species within 50 km of city centre |                     |               |                |             |
|----------------|---------|--------------------------------------------------|-------------------|--------------|-------------|------------|-------------------------------------------------------------|---------------------|---------------|----------------|-------------|
|                |         |                                                  |                   |              |             |            | Lizard species                                              | Crocodilian species | Snake species | Turtle species | All species |
| ome            | jp      | Honshu - Shikoku - Kyushu                        | 5                 | 139.2430560  | 35.7838890  | 149324     | 0                                                           | 0                   | 0             | 3              | 3           |
| omsk           | ru      | Ob                                               | 0                 | 73.4000000   | 55.0000000  | 1129289    | 0                                                           | 0                   | 0             | 0              | 0           |
| omuta          | jp      | Honshu - Shikoku - Kyushu                        | 5                 | 130.4500000  | 33.0333330  | 131975     | 0                                                           | 0                   | 0             | 0              | 0           |
| ondo           | ng      | Bight Drainages                                  | 7                 | 4.8333330    | 7.1000000   | 257023     | 0                                                           | 0                   | 0             | 0              | 0           |
| ongole         | in      | Southern Deccan Plateau                          | 0                 | 80.0500000   | 15.5000000  | 172891     | 0                                                           | 0                   | 0             | 0              | 0           |
| onitsha        | ng      | Lower Niger - Benue                              | 2                 | 6.7884520    | 6.1454300   | 561106     | 0                                                           | 0                   | 0             | 0              | 0           |
| ontario        | us      | Southern California Coastal - Baja California    | 12                | -117.6500000 | 34.0633333  | 172808     | 0                                                           | 0                   | 0             | 6              | 6           |
| opobo          | ng      | Niger Delta                                      | 0                 | 7.5478020    | 4.5648440   | 125398     | 0                                                           | 0                   | 0             | 0              | 0           |
| opobo          | ng      | Niger Delta                                      | 0                 | 7.5400930    | 4.5114200   | 125398     | 0                                                           | 0                   | 0             | 0              | 0           |
| opole          | pl      | Central & Western Europe                         | 13                | 17.9500000   | 50.6666670  | 127676     | 0                                                           | 0                   | 0             | 1              | 1           |
| oradea         | ro      | Dniester - Lower Danube                          | 3                 | 21.9333330   | 47.0666670  | 203841     | 0                                                           | 0                   | 0             | 0              | 0           |
| orai           | in      | Ganges Delta & Plain                             | 13                | 79.4666670   | 25.9833330  | 158280     | 0                                                           | 0                   | 0             | 0              | 0           |
| orange         | us      | Southern California Coastal - Baja California    | 12                | -117.8522222 | 33.7877778  | 133874     | 0                                                           | 0                   | 0             | 7              | 7           |
| ordu           | tr      | Western Transcaucasia                            | 0                 | 37.8788890   | 40.9847220  | 116846     | 0                                                           | 0                   | 0             | 0              | 0           |
| orekhovo-zuevo | ru      | Volga - Ural                                     | 0                 | 38.9617820   | 55.8067220  | 120001     | 0                                                           | 0                   | 0             | 0              | 0           |
| orel           | ru      | Volga - Ural                                     | 0                 | 36.0784950   | 52.9650760  | 333310     | 0                                                           | 0                   | 0             | 0              | 0           |
| orizaba        | mx      | Papaloapan                                       | 13                | -97.1000000  | 18.8500000  | 121353     | 1                                                           | 0                   | 0             | 1              | 2           |
| orkney         | za      | Southern Temperate Highveld                      | 5                 | 26.6727170   | -26.9802320 | 145843     | 0                                                           | 0                   | 0             | 1              | 1           |
| orlando        | us      | Florida Peninsula                                | 30                | -81.3794444  | 28.5380556  | 207970     | 0                                                           | 1                   | 1             | 11             | 13          |
| orleans        | fr      | Central & Western Europe                         | 13                | 1.9038870    | 47.9028910  | 118190     | 0                                                           | 0                   | 0             | 1              | 1           |
| oron           | ng      | Northern Gulf of Guinea Drainages - Bioko        | 1                 | 8.2343450    | 4.8256140   | 112040     | 0                                                           | 0                   | 0             | 0              | 0           |
| orsha          | by      | Dnieper - South Bug                              | 2                 | 30.4052778   | 54.5152778  | 125347     | 0                                                           | 0                   | 0             | 0              | 0           |
| orsk           | ru      | Volga - Ural                                     | 0                 | 58.5668480   | 51.2048730  | 246839     | 0                                                           | 0                   | 0             | 0              | 0           |
| orumiyeh       | ir      | Orumiyeh                                         | 0                 | 45.0724000   | 37.5553000  | 602443     | 0                                                           | 0                   | 0             | 0              | 0           |

Table S2 Cities and freshwater reptiles

| City          | Country | Freshwater Ecoregions of the World (FEOW) Region | Regional richness | Longitude    | Latitude    | Population | # of freshwater reptile species within 50 km of city centre |                     |               |                |             |
|---------------|---------|--------------------------------------------------|-------------------|--------------|-------------|------------|-------------------------------------------------------------|---------------------|---------------|----------------|-------------|
|               |         |                                                  |                   |              |             |            | Lizard species                                              | Crocodilian species | Snake species | Turtle species | All species |
| oruro         | bo      | Titicaca                                         | 0                 | -67.1500000  | -17.9833333 | 208687     | 0                                                           | 0                   | 0             | 0              | 0           |
| osasco        | br      | Upper Parana                                     | 3                 | -46.7833330  | -23.5666670 | 677869     | 0                                                           | 0                   | 0             | 1              | 1           |
| oshawa        | ca      | Laurentian Great Lakes                           | 16                | -78.8666670  | 43.9000000  | 247989     | 0                                                           | 0                   | 0             | 6              | 6           |
| oshogbo       | ng      | Bight Drainages                                  | 7                 | 4.5666670    | 7.7666670   | 499444     | 0                                                           | 0                   | 0             | 0              | 0           |
| oskemen       | kz      | Ob                                               | 0                 | 82.6102780   | 49.9788890  | 319082     | 0                                                           | 0                   | 0             | 0              | 0           |
| oslo          | no      | Northern Baltic Drainages                        | 2                 | 10.7500000   | 59.9166670  | 808690     | 0                                                           | 0                   | 0             | 0              | 0           |
| osmaniye      | tr      | Southern Anatolia                                | 2                 | 36.2477780   | 37.0741670  | 202944     | 0                                                           | 0                   | 0             | 0              | 0           |
| osnabruck     | de      | Central & Western Europe                         | 13                | 8.0500000    | 52.2666670  | 165372     | 0                                                           | 0                   | 0             | 2              | 2           |
| osorno        | cl      | Valdivian Lakes                                  | 0                 | -73.1500000  | -40.5666670 | 135774     | 0                                                           | 0                   | 0             | 0              | 0           |
| ostrava       | cz      | Central & Western Europe                         | 13                | 18.2552820   | 49.8118520  | 317136     | 0                                                           | 0                   | 0             | 1              | 1           |
| ota           | jp      | Honshu - Shikoku - Kyushu                        | 5                 | 139.3666670  | 36.3000000  | 152106     | 0                                                           | 0                   | 0             | 0              | 0           |
| otaru         | jp      | Sakhalin, Hokkaido, & Sikhote - Alin Coast       | 0                 | 141.0022220  | 43.1894440  | 143794     | 0                                                           | 0                   | 0             | 0              | 0           |
| ottawa        | ca      | St.Lawrence                                      | 10                | -75.7000000  | 45.4166670  | 874433     | 0                                                           | 0                   | 0             | 5              | 5           |
| otukpo        | ng      | Northern Gulf of Guinea Drainages - Bioko        | 1                 | 8.6531000    | 6.8150000   | 160830     | 0                                                           | 0                   | 0             | 0              | 0           |
| ouagadougou   | bf      | Volta                                            | 7                 | -1.5247222   | 12.3702778  | 1031330    | 0                                                           | 1                   | 0             | 0              | 1           |
| oulu          | fi      | Northern Baltic Drainages                        | 2                 | 25.4666670   | 65.0166670  | 128618     | 0                                                           | 0                   | 0             | 0              | 0           |
| overland park | us      | Central Prairie                                  | 17                | -94.6705556  | 38.9822222  | 166010     | 0                                                           | 0                   | 0             | 6              | 6           |
| oviedo        | es      | Cantabric Coast - Languedoc                      | 10                | -5.8531280   | 43.3632230  | 198250     | 0                                                           | 0                   | 0             | 1              | 1           |
| owerri        | ng      | Niger Delta                                      | 0                 | 7.0304070    | 5.4833330   | 215053     | 0                                                           | 0                   | 0             | 0              | 0           |
| owo           | ng      | Bight Drainages                                  | 7                 | 5.5868060    | 7.1961950   | 276593     | 0                                                           | 0                   | 0             | 0              | 0           |
| oxford        | gb      | Central & Western Europe                         | 13                | -1.2500000   | 51.7500000  | 154567     | 0                                                           | 0                   | 0             | 0              | 0           |
| oxnard        | us      | Southern California Coastal - Baja California    | 12                | -119.1761111 | 34.1975000  | 187235     | 0                                                           | 0                   | 0             | 2              | 2           |
| oyama         | jp      | Honshu - Shikoku - Kyushu                        | 5                 | 139.8000000  | 36.3000000  | 159938     | 0                                                           | 0                   | 0             | 0              | 0           |
| oyo           | ng      | Bight Drainages                                  | 7                 | 3.9333330    | 7.8500000   | 736113     | 1                                                           | 0                   | 0             | 0              | 1           |

Table S2 Cities and freshwater reptiles

| City          | Country | Freshwater Ecoregions of the World (FEOW) Region | Regional richness | Longitude    | Latitude    | Population | # of freshwater reptile species within 50 km of city centre |                     |               |                |             |
|---------------|---------|--------------------------------------------------|-------------------|--------------|-------------|------------|-------------------------------------------------------------|---------------------|---------------|----------------|-------------|
|               |         |                                                  |                   |              |             |            | Lizard species                                              | Crocodilian species | Snake species | Turtle species | All species |
| paarl         | za      | Cape Fold                                        | 3                 | 18.9752280   | -33.7337810 | 187875     | 0                                                           | 0                   | 1             | 1              | 2           |
| pabna         | bd      | Ganges Delta & Plain                             | 13                | 89.2500000   | 24.0000000  | 137904     | 0                                                           | 0                   | 0             | 0              | 0           |
| pacet         | id      | Southern Sumatra - Western Java                  | 8                 | 107.0466670  | -6.7502780  | 328324     | 1                                                           | 0                   | 1             | 0              | 2           |
| pachuca       | mx      | Lerma - Chapala                                  | 10                | -98.7333330  | 20.1166670  | 319593     | 0                                                           | 0                   | 0             | 1              | 1           |
| padalarang    | id      | Southern Sumatra - Western Java                  | 8                 | 107.4847220  | -6.8425000  | 124953     | 0                                                           | 0                   | 0             | 0              | 0           |
| padang        | id      | Indian Ocean Slope of Sumatra & Java             | 9                 | 100.3676590  | -0.9531540  | 840458     | 1                                                           | 0                   | 0             | 0              | 1           |
| paderborn     | de      | Central & Western Europe                         | 13                | 8.7666670    | 51.7166670  | 143096     | 0                                                           | 0                   | 0             | 3              | 3           |
| padova        | it      | Gulf of Venice Drainages                         | 8                 | 11.8833330   | 45.4166670  | 205247     | 0                                                           | 0                   | 0             | 2              | 2           |
| pagadian      | ph      | Mindanao                                         | 1                 | 123.4370000  | 7.8257000   | 132578     | 0                                                           | 0                   | 0             | 0              | 0           |
| pak kret      | th      | Chao Phraya                                      | 12                | 100.4988280  | 13.9130140  | 182926     | 1                                                           | 0                   | 0             | 7              | 8           |
| pakokku       | mm      | Sitang - Irawaddy                                | 0                 | 95.1000000   | 21.3333333  | 126954     | 0                                                           | 0                   | 0             | 0              | 0           |
| pakpattan     | pk      | Lower & Middle Indus                             | 2                 | 73.3866420   | 30.3410440  | 126743     | 0                                                           | 0                   | 0             | 0              | 0           |
| palakkad      | in      | Western Ghats                                    | 4                 | 76.6513890   | 10.7725000  | 132740     | 0                                                           | 0                   | 0             | 0              | 0           |
| palanpur      | in      | Lower & Middle Indus                             | 2                 | 72.4333330   | 24.1666670  | 123301     | 0                                                           | 0                   | 0             | 0              | 0           |
| palembang     | id      | Southern Sumatra - Western Java                  | 8                 | 104.7500000  | -2.9166670  | 1241334    | 0                                                           | 0                   | 0             | 0              | 0           |
| palermo       | it      | Italian Peninsula & Islands                      | 6                 | 13.3666670   | 38.1166670  | 669582     | 0                                                           | 0                   | 0             | 2              | 2           |
| palhoca       | br      | Southeastern Mata Atlantica                      | 2                 | -48.6666670  | -27.6333330 | 122425     | 0                                                           | 1                   | 0             | 0              | 1           |
| pali          | in      | Lower & Middle Indus                             | 2                 | 73.3333330   | 25.7666670  | 210117     | 0                                                           | 0                   | 0             | 0              | 0           |
| pallavaram    | in      | Southeastern Ghats                               | 3                 | 80.1836110   | 12.9761110  | 157158     | 0                                                           | 2                   | 0             | 0              | 2           |
| palma         | es      | Eastern Iberia                                   | 13                | 2.6552220    | 39.5743370  | 378884     | 0                                                           | 0                   | 0             | 1              | 1           |
| palma soriano | cu      | Cuba - Cayman Islands                            | 2                 | -75.9988889  | 20.2172222  | 102830     | 0                                                           | 0                   | 0             | 0              | 0           |
| palmas        | br      | Tocantins - Araguaia                             | 0                 | -48.2777780  | -10.2227780 | 196332     | 0                                                           | 0                   | 0             | 0              | 0           |
| palmdale      | us      | Death Valley                                     | 5                 | -118.1155556 | 34.5794444  | 135294     | 0                                                           | 0                   | 0             | 5              | 5           |
| palmira       | co      | Magdalena - Sinu                                 | 15                | -76.3036110  | 3.5394440   | 247991     | 0                                                           | 1                   | 0             | 1              | 2           |

Table S2 Cities and freshwater reptiles

| City       | Country | Freshwater Ecoregions of the World (FEOW) Region | Regional richness | Longitude    | Latitude    | Population | # of freshwater reptile species within 50 km of city centre |                     |               |                |             |
|------------|---------|--------------------------------------------------|-------------------|--------------|-------------|------------|-------------------------------------------------------------|---------------------|---------------|----------------|-------------|
|            |         |                                                  |                   |              |             |            | Lizard species                                              | Crocodilian species | Snake species | Turtle species | All species |
| palo negro | ve      | Orinoco Piedmont                                 | 10                | -67.5419444  | 10.1738889  | 128895     | 0                                                           | 0                   | 0             | 1              | 1           |
| palu       | id      | Sulawesi                                         | 2                 | 119.8707000  | -0.8917000  | 282461     | 0                                                           | 0                   | 0             | 0              | 0           |
| palwal     | in      | Ganges Delta & Plain                             | 13                | 77.3333330   | 28.1500000  | 121974     | 0                                                           | 0                   | 0             | 0              | 0           |
| pamanukan  | id      | Southern Sumatra - Western Java                  | 8                 | 107.8105560  | -6.2841670  | 114386     | 0                                                           | 0                   | 0             | 0              | 0           |
| pamplona   | es      | Eastern Iberia                                   | 13                | -1.6411530   | 42.8140750  | 191549     | 0                                                           | 0                   | 0             | 4              | 4           |
| pamulang   | id      | Southern Sumatra - Western Java                  | 8                 | 106.7383330  | -6.3427780  | 174549     | 1                                                           | 2                   | 2             | 0              | 5           |
| panama     | pa      | Rio Tuira                                        | 5                 | -79.5333333  | 8.9666667   | 408188     | 2                                                           | 2                   | 0             | 3              | 7           |
| panchiao   | tw      | Western Taiwan                                   | 2                 | 121.5250000  | 25.0391667  | 491891     | 0                                                           | 0                   | 0             | 2              | 2           |
| panevezys  | lt      | Central & Western Europe                         | 13                | 24.3500000   | 55.7333333  | 117400     | 0                                                           | 0                   | 0             | 0              | 0           |
| pangkah    | id      | Central & Eastern Java                           | 4                 | 109.1732000  | -6.9745000  | 113387     | 0                                                           | 0                   | 0             | 0              | 0           |
| panihati   | in      | Ganges Delta & Plain                             | 13                | 88.3744440   | 22.6941670  | 378741     | 1                                                           | 0                   | 0             | 0              | 1           |
| panipat    | in      | Ganges Delta & Plain                             | 13                | 76.9680560   | 29.3888890  | 292828     | 0                                                           | 0                   | 0             | 0              | 0           |
| panvel     | in      | Western Ghats                                    | 4                 | 73.1000000   | 18.9833330  | 128056     | 0                                                           | 0                   | 0             | 0              | 0           |
| panzhihua  | cn      | Middle Yangtze                                   | 1                 | 101.7053860  | 26.5479020  | 461513     | 0                                                           | 0                   | 0             | 0              | 0           |
| paradise   | us      | Vegas - Virgin                                   | 2                 | -115.1458333 | 36.0972222  | 215120     | 0                                                           | 0                   | 0             | 3              | 3           |
| parakou    | bj      | Bight Drainages                                  | 7                 | 2.6166667    | 9.3500000   | 163759     | 1                                                           | 1                   | 1             | 0              | 3           |
| paramaribo | sr      | Guianas                                          | 7                 | -55.1666667  | 5.8333333   | 220306     | 0                                                           | 0                   | 1             | 0              | 1           |
| parana     | ar      | Lower Parana                                     | 9                 | -60.5238020  | -31.7319670 | 299257     | 0                                                           | 1                   | 0             | 1              | 2           |
| paranagua  | br      | Southeastern Mata Atlantica                      | 2                 | -48.5000000  | -25.5166670 | 141014     | 0                                                           | 0                   | 0             | 0              | 0           |
| parbhani   | in      | Northern Deccan Plateau                          | 2                 | 76.7833330   | 19.2666670  | 289652     | 0                                                           | 0                   | 0             | 0              | 0           |
| paris      | fr      | Central & Western Europe                         | 13                | 2.3333330    | 48.8666670  | 2110694    | 0                                                           | 0                   | 0             | 1              | 1           |
| parma      | it      | Gulf of Venice Drainages                         | 8                 | 10.3333330   | 44.8000000  | 155693     | 0                                                           | 0                   | 0             | 1              | 1           |
| parnaiba   | br      | Parnaiba                                         | 0                 | -41.7747220  | -2.9091670  | 138011     | 0                                                           | 0                   | 0             | 0              | 0           |
| parnamirim | br      | Northeastern Caatinga & Coastal Drainages        | 1                 | -35.2500000  | -5.9166670  | 150347     | 0                                                           | 0                   | 0             | 0              | 0           |

Table S2 Cities and freshwater reptiles

| City           | Country | Freshwater Ecoregions of the World (FEOW) Region   | Regional richness | Longitude    | Latitude    | Population | # of freshwater reptile species within 50 km of city centre |                     |               |                |             |
|----------------|---------|----------------------------------------------------|-------------------|--------------|-------------|------------|-------------------------------------------------------------|---------------------|---------------|----------------|-------------|
|                |         |                                                    |                   |              |             |            | Lizard species                                              | Crocodilian species | Snake species | Turtle species | All species |
| parsabad       | ir      | Kura - South Caspian Drainages                     | 4                 | 47.9174000   | 39.6482000  | 101715     | 0                                                           | 0                   | 0             | 0              | 0           |
| parung         | id      | Southern Sumatra - Western Java                    | 8                 | 106.9715000  | -6.3276000  | 193991     | 1                                                           | 2                   | 2             | 0              | 5           |
| pasadena       | us      | Sabine - Galveston                                 | 29                | -95.2088889  | 29.6908333  | 144696     | 0                                                           | 1                   | 1             | 14             | 16          |
| pasadena       | us      | Southern California Coastal - Baja California      | 12                | -118.1436111 | 34.1477778  | 144618     | 0                                                           | 1                   | 1             | 14             | 16          |
| pasarkemis     | id      | Southern Sumatra - Western Java                    | 8                 | 106.5302780  | -6.1702780  | 154227     | 1                                                           | 2                   | 2             | 0              | 5           |
| paseh          | id      | Southern Sumatra - Western Java                    | 8                 | 107.8672220  | -6.8038890  | 126287     | 0                                                           | 0                   | 0             | 0              | 0           |
| pasir gudang   | my      | Malay Peninsula Eastern Slope                      | 12                | 103.9053000  | 1.4620000   | 145739     | 1                                                           | 1                   | 1             | 6              | 9           |
| passo fundo    | br      | Laguna dos Patos                                   | 2                 | -52.4000000  | -28.2666670 | 179532     | 0                                                           | 0                   | 0             | 0              | 0           |
| pasto          | co      | North Andean Pacific Slopes - Rio Atrato           | 14                | -77.2811110  | 1.2136110   | 382242     | 0                                                           | 0                   | 0             | 0              | 0           |
| pasuruan       | id      | Central & Eastern Java                             | 4                 | 112.9075000  | -7.6453000  | 158618     | 0                                                           | 0                   | 0             | 0              | 0           |
| patan          | in      | Lower & Middle Indus                               | 2                 | 72.1166670   | 23.8333330  | 117871     | 0                                                           | 0                   | 0             | 0              | 0           |
| pate           | tw      | Western Taiwan                                     | 2                 | 121.2833333  | 24.9333333  | 176909     | 0                                                           | 0                   | 0             | 2              | 2           |
| paterson       | us      | Northeast US & Southeast Canada Atlantic Drainages | 18                | -74.1722222  | 40.9166667  | 151205     | 0                                                           | 0                   | 0             | 10             | 10          |
| pathankot      | in      | Lower & Middle Indus                               | 2                 | 75.6500000   | 32.2833330  | 174319     | 0                                                           | 0                   | 0             | 0              | 0           |
| pathein        | mm      | Sitang - Irawaddy                                  | 0                 | 94.7333333   | 16.7833333  | 237119     | 0                                                           | 0                   | 0             | 0              | 0           |
| pati           | id      | Central & Eastern Java                             | 4                 | 111.0380000  | -6.7559000  | 122798     | 0                                                           | 0                   | 0             | 0              | 0           |
| patiala        | in      | Lower & Middle Indus                               | 2                 | 76.4002780   | 30.3266670  | 329248     | 0                                                           | 0                   | 0             | 0              | 0           |
| patna          | in      | Ganges Delta & Plain                               | 13                | 85.1166670   | 25.6000000  | 1600085    | 0                                                           | 0                   | 0             | 0              | 0           |
| patos de minas | br      | Upper Parana                                       | 3                 | -46.5333330  | -18.5833330 | 126236     | 0                                                           | 0                   | 0             | 0              | 0           |
| patrai         | gr      | Aegean Drainages                                   | 3                 | 21.7344444   | 38.2444444  | 163361     | 0                                                           | 0                   | 0             | 0              | 0           |
| paulista       | br      | Northeastern Caatinga & Coastal Drainages          | 1                 | -34.8833330  | -7.9500000  | 289977     | 0                                                           | 0                   | 0             | 0              | 0           |
| pavlodar       | kz      | Ob                                                 | 0                 | 76.9500000   | 52.3000000  | 329014     | 0                                                           | 0                   | 0             | 0              | 0           |
| pavlohrad      | ua      | Dnieper - South Bug                                | 2                 | 35.8704990   | 48.5334100  | 115931     | 0                                                           | 0                   | 0             | 0              | 0           |

Table S2 Cities and freshwater reptiles

| City           | Country | Freshwater Ecoregions of the World (FEOW) Region | Regional richness | Longitude   | Latitude    | Population | # of freshwater reptile species within 50 km of city centre |                     |               |                |             |
|----------------|---------|--------------------------------------------------|-------------------|-------------|-------------|------------|-------------------------------------------------------------|---------------------|---------------|----------------|-------------|
|                |         |                                                  |                   |             |             |            | Lizard species                                              | Crocodilian species | Snake species | Turtle species | All species |
| payakumbuh     | id      | Southern Central Sumatra                         | 3                 | 100.6307810 | -0.2201900  | 121652     | 0                                                           | 0                   | 0             | 0              | 0           |
| pecs           | hu      | Upper Danube                                     | 5                 | 18.2328450  | 46.0753630  | 156661     | 0                                                           | 0                   | 0             | 0              | 0           |
| pekalongan     | id      | Central & Eastern Java                           | 4                 | 109.6753000 | -6.8886000  | 257973     | 0                                                           | 0                   | 0             | 0              | 0           |
| peking         | cn      | Lower Huang He                                   | 0                 | 116.3883330 | 39.9288890  | 7480601    | 0                                                           | 0                   | 0             | 0              | 0           |
| pelotas        | br      | Laguna dos Patos                                 | 2                 | -52.3333330 | -31.7666670 | 320680     | 0                                                           | 0                   | 0             | 0              | 0           |
| pemalang       | id      | Central & Eastern Java                           | 4                 | 109.3666670 | -6.9000000  | 184169     | 0                                                           | 0                   | 0             | 0              | 0           |
| pemba          | mz      | Coastal East Africa                              | 4                 | 40.5077778  | -12.9608333 | 108737     | 0                                                           | 0                   | 0             | 0              | 0           |
| pembroke pines | us      | Florida Peninsula                                | 30                | -80.2241667 | 26.0027778  | 155862     | 1                                                           | 3                   | 1             | 12             | 17          |
| penza          | ru      | Volga - Ural                                     | 0                 | 45.0046430  | 53.2006560  | 512607     | 0                                                           | 0                   | 0             | 0              | 0           |
| peoria         | us      | Gila                                             | 10                | 112.2366667 | 33.5805556  | 139368     | 0                                                           | 0                   | 0             | 2              | 2           |
| peoria         | us      | Upper Mississippi                                | 20                | -89.5888889 | 40.6936111  | 113004     | 0                                                           | 0                   | 0             | 2              | 2           |
| perbaungan     | id      | Northern Central Sumatra - Western Malaysia      | 7                 | 98.9560000  | 3.5679000   | 157378     | 0                                                           | 0                   | 0             | 1              | 1           |
| pereira        | co      | Magdalena - Sinu                                 | 15                | -75.6961110 | 4.8133330   | 440123     | 0                                                           | 0                   | 0             | 1              | 1           |
| peristerion    | gr      | Aegean Drainages                                 | 3                 | 23.7000000  | 38.0166667  | 137660     | 0                                                           | 0                   | 0             | 2              | 2           |
| perm           | ru      | Volga - Ural                                     | 0                 | 56.2840630  | 58.0092820  | 982428     | 0                                                           | 0                   | 0             | 0              | 0           |
| perpignan      | fr      | Cantabric Coast - Languedoc                      | 10                | 2.8970980   | 42.6961720  | 104783     | 0                                                           | 0                   | 0             | 3              | 3           |
| perth          | au      | Southwestern Australia                           | 6                 | 115.8613970 | -31.9522400 | 1446715    | 2                                                           | 0                   | 2             | 2              | 6           |
| perugia        | it      | Italian Peninsula & Islands                      | 6                 | 12.3666670  | 43.1333330  | 157077     | 0                                                           | 0                   | 0             | 0              | 0           |
| pervouralsk    | ru      | Volga - Ural                                     | 0                 | 59.9436110  | 56.9052780  | 130016     | 0                                                           | 0                   | 0             | 0              | 0           |
| pescara        | it      | Gulf of Venice Drainages                         | 8                 | 14.2166670  | 42.4666670  | 118136     | 0                                                           | 0                   | 0             | 0              | 0           |
| peshawar       | pk      | Lower & Middle Indus                             | 2                 | 71.5784880  | 34.0080000  | 1219248    | 0                                                           | 0                   | 0             | 0              | 0           |
| petaling jaya  | my      | Northern Central Sumatra - Western Malaysia      | 7                 | 101.6500000 | 3.0833330   | 520712     | 1                                                           | 0                   | 0             | 2              | 3           |
| petapa         | gt      | Chiapas - Fonseca                                | 11                | -90.5516670 | 14.5027780  | 137839     | 1                                                           | 0                   | 0             | 1              | 2           |
| petare         | ve      | South America Caribbean Drainages - Trinidad     | 6                 | -66.8166667 | 10.4833333  | 365959     | 0                                                           | 0                   | 0             | 0              | 0           |

Table S2 Cities and freshwater reptiles

| City                      | Country | Freshwater Ecoregions of the World (FEOW) Region   | Regional richness | Longitude    | Latitude    | Population | # of freshwater reptile species within 50 km of city centre |                     |               |                |             |
|---------------------------|---------|----------------------------------------------------|-------------------|--------------|-------------|------------|-------------------------------------------------------------|---------------------|---------------|----------------|-------------|
|                           |         |                                                    |                   |              |             |            | Lizard species                                              | Crocodilian species | Snake species | Turtle species | All species |
| peterborough              | gb      | Central & Western Europe                           | 13                | -0.2500000   | 52.5833330  | 140142     | 0                                                           | 0                   | 0             | 1              | 1           |
| petionville               | ht      | Hispaniola                                         | 5                 | -72.2852778  | 18.5125000  | 108235     | 0                                                           | 0                   | 0             | 0              | 0           |
| petrolina                 | br      | S. Francisco                                       | 0                 | -40.5000000  | -9.4000000  | 194653     | 0                                                           | 0                   | 0             | 0              | 0           |
| petropavl                 | kz      | Ob                                                 | 0                 | 69.1627780   | 54.8752780  | 200891     | 0                                                           | 0                   | 0             | 0              | 0           |
| petropavlovsk-kamchatskiy | ru      | Kamchatka & Northern Kurils                        | 0                 | 158.6483000  | 53.0452000  | 187283     | 0                                                           | 0                   | 0             | 0              | 0           |
| petropolis                | br      | Paraiba do Sul                                     | 0                 | -43.1844440  | -22.5108330 | 272694     | 0                                                           | 1                   | 0             | 0              | 1           |
| petrozavodsk              | ru      | Lake Onega - Lake Ladoga                           | 0                 | 34.3492950   | 61.7961310  | 265027     | 0                                                           | 0                   | 0             | 0              | 0           |
| pforzheim                 | de      | Central & Western Europe                           | 13                | 8.7000000    | 48.8833330  | 120366     | 0                                                           | 0                   | 0             | 5              | 5           |
| phagwara                  | in      | Lower & Middle Indus                               | 2                 | 75.7694440   | 31.2177780  | 100154     | 0                                                           | 0                   | 0             | 0              | 0           |
| phalaborwa                | za      | Zambezian Lowveld                                  | 10                | 31.1410730   | -23.9429870 | 109468     | 1                                                           | 1                   | 0             | 2              | 4           |
| phan thiet                | vn      | Southern Annam                                     | 2                 | 108.1000000  | 10.9333330  | 160665     | 0                                                           | 0                   | 0             | 0              | 0           |
| philadelphia              | us      | Northeast US & Southeast Canada Atlantic Drainages | 18                | -75.1641667  | 39.9522222  | 1453268    | 0                                                           | 0                   | 0             | 5              | 5           |
| phitsanulok               | th      | Chao Phraya                                        | 12                | 100.2585840  | 16.8248060  | 103427     | 0                                                           | 0                   | 0             | 0              | 0           |
| phnum penh                | kh      | Mekong Delta                                       | 3                 | 104.9166667  | 11.5500000  | 1573523    | 0                                                           | 0                   | 0             | 0              | 0           |
| phoenix                   | us      | Gila                                               | 10                | -112.0733333 | 33.4483333  | 1428509    | 0                                                           | 0                   | 0             | 2              | 2           |
| phra pradaeng             | th      | Chao Phraya                                        | 12                | 100.5336180  | 13.6585450  | 171333     | 1                                                           | 0                   | 0             | 7              | 8           |
| piatra neamt              | ro      | Dniester - Lower Danube                            | 3                 | 26.3333330   | 46.9166670  | 102689     | 0                                                           | 0                   | 0             | 0              | 0           |
| piedras negras            | mx      | Lower Rio Grande - Bravo                           | 14                | -100.5166670 | 28.7000000  | 139624     | 0                                                           | 0                   | 0             | 1              | 1           |
| pietermaritzburg          | za      | Southern Temperate Highveld                        | 5                 | 30.3927800   | -29.6167850 | 750864     | 0                                                           | 0                   | 1             | 1              | 2           |
| pietersburg               | za      | Southern Temperate Highveld                        | 5                 | 29.4688510   | -23.9044850 | 123754     | 0                                                           | 0                   | 0             | 1              | 1           |
| pilibhit                  | in      | Ganges Delta & Plain                               | 13                | 79.8000000   | 28.6333330  | 131021     | 0                                                           | 0                   | 0             | 0              | 0           |
| pimpri                    | in      | Western Ghats                                      | 4                 | 73.8000000   | 18.6166670  | 1284702    | 0                                                           | 0                   | 0             | 0              | 0           |
| pinar del rio             | cu      | Cuba - Cayman Islands                              | 2                 | -83.6980556  | 22.4175000  | 186997     | 0                                                           | 0                   | 0             | 0              | 0           |
| pindamonhangaba           | br      | Paraiba do Sul                                     | 0                 | -45.4666670  | -22.9166670 | 132220     | 0                                                           | 0                   | 0             | 0              | 0           |

Table S2 Cities and freshwater reptiles

| City            | Country | Freshwater Ecoregions of the World (FEOW) Region | Regional richness | Longitude   | Latitude    | Population | # of freshwater reptile species within 50 km of city centre |                     |               |                |             |
|-----------------|---------|--------------------------------------------------|-------------------|-------------|-------------|------------|-------------------------------------------------------------|---------------------|---------------|----------------|-------------|
|                 |         |                                                  |                   |             |             |            | Lizard species                                              | Crocodilian species | Snake species | Turtle species | All species |
| pindiga         | ng      | Lower Niger - Benue                              | 2                 | 10.9333330  | 9.9833330   | 106323     | 0                                                           | 0                   | 0             | 0              | 0           |
| pingchen        | tw      | Western Taiwan                                   | 2                 | 121.2000000 | 24.9500000  | 219163     | 0                                                           | 0                   | 0             | 2              | 2           |
| pingdingshan    | cn      | Lower Yangtze                                    | 4                 | 113.3011940 | 33.7384720  | 889675     | 0                                                           | 0                   | 0             | 0              | 0           |
| pingliang       | cn      | Lower Huang He                                   | 0                 | 106.6861110 | 35.5391670  | 108156     | 0                                                           | 0                   | 0             | 0              | 0           |
| pingshan        | cn      | Xi Yang                                          | 15                | 114.7131090 | 22.9937610  | 113631     | 0                                                           | 0                   | 0             | 0              | 0           |
| pingtung        | tw      | Western Taiwan                                   | 2                 | 120.4883333 | 22.6725000  | 208920     | 0                                                           | 0                   | 0             | 1              | 1           |
| pingxiang       | cn      | Lower Yangtze                                    | 4                 | 113.8500000 | 27.6166670  | 372123     | 0                                                           | 0                   | 0             | 0              | 0           |
| pinsk           | by      | Dnieper - South Bug                              | 2                 | 26.0727778  | 52.1213889  | 130777     | 0                                                           | 0                   | 0             | 0              | 0           |
| piracicaba      | br      | Upper Parana                                     | 3                 | -47.6333330 | -22.7166670 | 342216     | 0                                                           | 1                   | 0             | 1              | 2           |
| pitesti         | ro      | Dniester - Lower Danube                          | 3                 | 24.8666670  | 44.8500000  | 167671     | 0                                                           | 0                   | 0             | 0              | 0           |
| pittsburgh      | us      | Teays - Old Ohio                                 | 17                | -79.9961111 | 40.4405556  | 319494     | 0                                                           | 0                   | 0             | 5              | 5           |
| piura           | pe      | North Andean Pacific Slopes - Rio Atrato         | 14                | -80.6333333 | -5.2000000  | 326592     | 0                                                           | 0                   | 0             | 0              | 0           |
| plano           | us      | Sabine - Galveston                               | 29                | -96.6986111 | 33.0197222  | 253372     | 0                                                           | 1                   | 1             | 13             | 15          |
| play cu         | vn      | Kratie - Stung Treng (Mekong)                    | 0                 | 108.0000000 | 13.9833330  | 114234     | 0                                                           | 0                   | 0             | 0              | 0           |
| pleven          | bg      | Dniester - Lower Danube                          | 3                 | 24.6166667  | 43.4166667  | 132542     | 0                                                           | 0                   | 0             | 0              | 0           |
| plock           | pl      | Central & Western Europe                         | 13                | 19.7000000  | 52.5500000  | 127474     | 0                                                           | 0                   | 0             | 1              | 1           |
| ploiesti        | ro      | Dniester - Lower Danube                          | 3                 | 26.0166670  | 44.9500000  | 228853     | 0                                                           | 0                   | 0             | 0              | 0           |
| plovdiv         | bg      | Thrace                                           | 3                 | 24.7500000  | 42.1500000  | 332088     | 0                                                           | 0                   | 0             | 1              | 1           |
| plumbon         | id      | Southern Sumatra - Western Java                  | 8                 | 108.3177780 | -6.5769440  | 167187     | 0                                                           | 0                   | 0             | 0              | 0           |
| plymouth        | gb      | Central & Western Europe                         | 13                | -4.1386110  | 50.3963890  | 247298     | 0                                                           | 0                   | 0             | 0              | 0           |
| plzen           | cz      | Central & Western Europe                         | 13                | 13.3666670  | 49.7500000  | 165531     | 0                                                           | 0                   | 0             | 0              | 0           |
| poa             | br      | Upper Parana                                     | 3                 | -46.3333330 | -23.5333330 | 107434     | 0                                                           | 0                   | 0             | 1              | 1           |
| pocos de caldas | br      | Upper Parana                                     | 3                 | -46.5666670 | -21.8000000 | 146590     | 0                                                           | 0                   | 0             | 0              | 0           |
| podgorica       | me      | Southeast Adriatic Drainages                     | 2                 | 19.2636110  | 42.4411110  | 156988     | 0                                                           | 0                   | 0             | 0              | 0           |
| podolsk         | ru      | Volga - Ural                                     | 0                 | 37.5547170  | 55.4241850  | 175326     | 0                                                           | 0                   | 0             | 0              | 0           |

Table S2 Cities and freshwater reptiles

| City             | Country | Freshwater Ecoregions of the World (FEOW) Region | Regional richness | Longitude    | Latitude    | Population | # of freshwater reptile species within 50 km of city centre |                     |               |                |             |
|------------------|---------|--------------------------------------------------|-------------------|--------------|-------------|------------|-------------------------------------------------------------|---------------------|---------------|----------------|-------------|
|                  |         |                                                  |                   |              |             |            | Lizard species                                              | Crocodilian species | Snake species | Turtle species | All species |
| pokhara          | np      | Ganges Himalayan Foothills                       | 3                 | 83.9833333   | 28.2333333  | 186410     | 0                                                           | 0                   | 0             | 0              | 0           |
| poltava          | ua      | Dnieper - South Bug                              | 2                 | 34.5407330   | 49.5937270  | 317845     | 0                                                           | 0                   | 0             | 0              | 0           |
| pomona           | us      | Southern California Coastal - Baja California    | 12                | -117.7513889 | 34.0552778  | 156183     | 0                                                           | 0                   | 0             | 6              | 6           |
| ponce            | us      | Puerto Rico - Virgin Islands                     | 2                 | -66.6144444  | 18.0130556  | 152639     | 0                                                           | 0                   | 0             | 0              | 0           |
| pondicherry      | in      | Southeastern Ghats                               | 3                 | 79.8300000   | 11.9300000  | 227434     | 0                                                           | 0                   | 0             | 0              | 0           |
| ponnani          | in      | Western Ghats                                    | 4                 | 75.9000000   | 10.7666670  | 105521     | 0                                                           | 0                   | 0             | 0              | 0           |
| ponta grossa     | br      | Upper Parana                                     | 3                 | -50.1500000  | -25.0833330 | 292179     | 0                                                           | 0                   | 0             | 0              | 0           |
| pontianak        | id      | Kapuas                                           | 2                 | 109.3333330  | -0.0333330  | 455226     | 0                                                           | 0                   | 0             | 0              | 0           |
| poole            | gb      | Central & Western Europe                         | 13                | -2.0000000   | 50.7166670  | 150092     | 0                                                           | 0                   | 0             | 1              | 1           |
| porbandar        | in      | Lower & Middle Indus                             | 2                 | 69.6000000   | 21.6333330  | 138881     | 0                                                           | 0                   | 0             | 0              | 0           |
| port blair       | in      | Placemark                                        | #N/A              | 92.7500000   | 11.6666670  | 112062     | 0                                                           | 0                   | 0             | 0              | 0           |
| port elizabeth   | za      | Cape Fold                                        | 3                 | 25.5700660   | -33.9179880 | 967722     | 0                                                           | 0                   | 1             | 1              | 2           |
| port harcourt    | ng      | Niger Delta                                      | 0                 | 7.0134040    | 4.7774230   | 1148753    | 0                                                           | 0                   | 0             | 0              | 0           |
| port louis       | mu      | Mascarenes                                       | 0                 | 57.4988889   | -20.1619444 | 155226     | 0                                                           | 1                   | 0             | 0              | 1           |
| port moresby     | pg      | Papuan Peninsula                                 | 0                 | 147.1925000  | -9.4647222  | 283733     | 0                                                           | 0                   | 0             | 0              | 0           |
| port said        | eg      | Nile Delta                                       | 0                 | 32.3000000   | 31.2666667  | 538377     | 0                                                           | 0                   | 0             | 0              | 0           |
| port saint lucie | us      | Florida Peninsula                                | 30                | -80.3505556  | 27.2936111  | 119371     | 1                                                           | 1                   | 0             | 6              | 8           |
| port-au-prince   | ht      | Hispaniola                                       | 5                 | -72.3350000  | 18.5391667  | 1234750    | 0                                                           | 0                   | 0             | 0              | 0           |
| port-gentil      | ga      | Ogooue - Nyanga - Kouilou - Niari                | 1                 | 8.7833333    | -0.7166667  | 109163     | 0                                                           | 0                   | 0             | 0              | 0           |
| portland         | us      | Columbia Unglaciaded                             | 4                 | -122.6750000 | 45.5236111  | 540513     | 0                                                           | 0                   | 0             | 3              | 3           |
| portmore         | jm      | Jamaica                                          | 2                 | -76.8666667  | 17.9666667  | 102865     | 0                                                           | 0                   | 0             | 0              | 0           |
| porto            | pt      | Western Iberia                                   | 6                 | -8.6109930   | 41.1496060  | 249630     | 0                                                           | 0                   | 0             | 0              | 0           |
| porto alegre     | br      | Laguna dos Patos                                 | 2                 | -51.2000000  | -30.0333330 | 1372763    | 0                                                           | 0                   | 0             | 0              | 0           |
| porto seguro     | br      | Northeastern Mata Atlantica                      | 1                 | -39.0833330  | -16.4333330 | 123196     | 0                                                           | 0                   | 0             | 0              | 0           |

Table S2 Cities and freshwater reptiles

| City                | Country | Freshwater Ecoregions of the World (FEOW) Region | Regional richness | Longitude   | Latitude    | Population | # of freshwater reptile species within 50 km of city centre |                     |               |                |             |
|---------------------|---------|--------------------------------------------------|-------------------|-------------|-------------|------------|-------------------------------------------------------------|---------------------|---------------|----------------|-------------|
|                     |         |                                                  |                   |             |             |            | Lizard species                                              | Crocodilian species | Snake species | Turtle species | All species |
| porto velho         | br      | Madeira Brazilian Shield                         | 0                 | -63.9000000 | -8.7666670  | 306206     | 0                                                           | 0                   | 0             | 0              | 0           |
| portoviejo          | ec      | North Andean Pacific Slopes - Rio Atrato         | 14                | -80.4500000 | -1.0500000  | 170326     | 0                                                           | 0                   | 0             | 0              | 0           |
| portsmouth          | gb      | Central & Western Europe                         | 13                | -1.0833330  | 50.7967000  | 194151     | 0                                                           | 0                   | 0             | 1              | 1           |
| posadas             | ar      | Lower Parana                                     | 9                 | -55.8960780 | -27.3670770 | 313438     | 0                                                           | 0                   | 0             | 0              | 0           |
| potchefstroom       | za      | Southern Temperate Highveld                      | 5                 | 27.1000000  | -26.7166670 | 123674     | 1                                                           | 0                   | 0             | 1              | 2           |
| potgietersrus       | za      | Southern Temperate Highveld                      | 5                 | 28.9867610  | -24.2013690 | 101090     | 0                                                           | 1                   | 0             | 0              | 1           |
| potosi              | bo      | Chaco                                            | 3                 | -65.7530556 | -19.5836111 | 141254     | 0                                                           | 0                   | 0             | 0              | 0           |
| potdam              | de      | Central & Western Europe                         | 13                | 13.0666670  | 52.4000000  | 145291     | 0                                                           | 0                   | 0             | 4              | 4           |
| pouso alegre        | br      | Upper Parana                                     | 3                 | -45.9333330 | -22.2166670 | 115203     | 0                                                           | 0                   | 0             | 0              | 0           |
| poznan              | pl      | Central & Western Europe                         | 13                | 16.9666670  | 52.4166670  | 570352     | 0                                                           | 0                   | 0             | 1              | 1           |
| prabumulih          | id      | Southern Sumatra - Western Java                  | 8                 | 104.2500000 | -3.4500000  | 103476     | 0                                                           | 0                   | 0             | 0              | 0           |
| prague              | cz      | Central & Western Europe                         | 13                | 14.4666670  | 50.0833330  | 1154508    | 0                                                           | 0                   | 0             | 0              | 0           |
| praia               | cv      | Cape Verde                                       | 0                 | -23.5166667 | 14.9166667  | 111611     | 0                                                           | 0                   | 0             | 0              | 0           |
| praia grande        | br      | Ribeira de Iguape                                | 1                 | -46.4000000 | -24.0000000 | 250032     | 0                                                           | 0                   | 0             | 1              | 1           |
| prato               | it      | Italian Peninsula & Islands                      | 6                 | 11.1000000  | 43.8833330  | 178915     | 0                                                           | 0                   | 0             | 1              | 1           |
| presidente prudente | br      | Upper Parana                                     | 3                 | -51.3666670 | -22.1166670 | 209507     | 0                                                           | 0                   | 0             | 0              | 0           |
| preston             | gb      | Central & Western Europe                         | 13                | -2.7166670  | 53.7666670  | 190688     | 0                                                           | 0                   | 0             | 1              | 1           |
| pretoria            | za      | Southern Temperate Highveld                      | 5                 | 28.2294440  | -25.7069440 | 1619485    | 1                                                           | 0                   | 1             | 2              | 4           |
| pringsewu           | id      | Southern Sumatra - Western Java                  | 8                 | 104.9744070 | -5.3582150  | 124791     | 0                                                           | 0                   | 0             | 0              | 0           |
| pristina            | rs      | Dniester - Lower Danube                          | 3                 | 21.1666670  | 42.6666670  | 254023     | 0                                                           | 0                   | 0             | 0              | 0           |
| prizren             | rs      | Southeast Adriatic Drainages                     | 2                 | 20.7397220  | 42.2138890  | 159145     | 0                                                           | 0                   | 0             | 0              | 0           |
| probolinggo         | id      | Central & Eastern Java                           | 4                 | 113.2159000 | -7.7543000  | 181678     | 0                                                           | 0                   | 0             | 0              | 0           |
| proddatur           | in      | Southern Deccan Plateau                          | 0                 | 78.5500000  | 14.7333330  | 177816     | 0                                                           | 0                   | 0             | 0              | 0           |
| prokopyevsk         | ru      | Ob                                               | 0                 | 86.7190000  | 53.9059000  | 215272     | 0                                                           | 0                   | 0             | 0              | 0           |

Table S2 Cities and freshwater reptiles

| City            | Country | Freshwater Ecoregions of the World (FEOW) Region   | Regional richness | Longitude    | Latitude    | Population | # of freshwater reptile species within 50 km of city centre |                     |               |                |             |
|-----------------|---------|----------------------------------------------------|-------------------|--------------|-------------|------------|-------------------------------------------------------------|---------------------|---------------|----------------|-------------|
|                 |         |                                                    |                   |              |             |            | Lizard species                                              | Crocodilian species | Snake species | Turtle species | All species |
| providence      | us      | Northeast US & Southeast Canada Atlantic Drainages | 18                | -71.4133333  | 41.8238889  | 177595     | 0                                                           | 0                   | 0             | 7              | 7           |
| provo           | us      | Bonneville                                         | 1                 | -111.6577778 | 40.2338889  | 105764     | 0                                                           | 0                   | 0             | 0              | 0           |
| pskov           | ru      | Southern Baltic Lowlands                           | 0                 | 28.3496000   | 57.8136000  | 201992     | 0                                                           | 0                   | 0             | 0              | 0           |
| pucallpa        | pe      | Amazonas Lowlands                                  | 19                | -74.5380556  | -8.3825000  | 311793     | 0                                                           | 0                   | 1             | 0              | 1           |
| pudukkottai     | in      | Southeastern Ghats                                 | 3                 | 78.8166670   | 10.3833330  | 112128     | 0                                                           | 0                   | 0             | 0              | 0           |
| puebla          | mx      | Rio Balsas                                         | 10                | -98.2000000  | 19.0500000  | 1392137    | 0                                                           | 0                   | 0             | 2              | 2           |
| pueblo          | us      | US Southern Plains                                 | 20                | -104.6086111 | 38.2544444  | 104293     | 0                                                           | 0                   | 0             | 2              | 2           |
| puerto cabello  | ve      | South America Caribbean Drainages - Trinidad       | 6                 | -68.0125000  | 10.4730556  | 163886     | 0                                                           | 0                   | 0             | 2              | 2           |
| puerto montt    | cl      | Valdivian Lakes                                    | 0                 | -72.9447450  | -41.4698480 | 160055     | 0                                                           | 0                   | 0             | 0              | 0           |
| puerto plata    | do      | Hispaniola                                         | 5                 | -70.6833333  | 19.8000000  | 119908     | 0                                                           | 0                   | 0             | 0              | 0           |
| puerto princesa | ph      | Palawan - Busuanga - Mindoro                       | 0                 | 118.7352780  | 9.7391670   | 154816     | 0                                                           | 0                   | 0             | 0              | 0           |
| puerto vallarta | mx      | Ameca - Manantlan                                  | 11                | -105.2500000 | 20.6166670  | 187143     | 1                                                           | 1                   | 0             | 3              | 5           |
| pulandian       | cn      | Liao He                                            | 0                 | 121.9669440  | 39.3952780  | 104277     | 0                                                           | 0                   | 0             | 0              | 0           |
| pune            | in      | Southern Deccan Plateau                            | 0                 | 73.8666670   | 18.5333330  | 2935968    | 0                                                           | 0                   | 0             | 0              | 0           |
| puno            | pe      | Titicaca                                           | 0                 | -70.0333333  | -15.8333333 | 116951     | 0                                                           | 0                   | 0             | 0              | 0           |
| punta arenas    | cl      | Patagonia                                          | 0                 | -70.9166670  | -53.1500000 | 117432     | 0                                                           | 0                   | 0             | 0              | 0           |
| punto fijo      | ve      | South America Caribbean Drainages - Trinidad       | 6                 | -70.1991667  | 11.6997222  | 131797     | 0                                                           | 0                   | 0             | 0              | 0           |
| puqi            | cn      | Lower Yangtze                                      | 4                 | 113.8833330  | 29.7166670  | 132891     | 0                                                           | 0                   | 0             | 0              | 0           |
| puri            | in      | Northern Deccan Plateau                            | 2                 | 85.8500000   | 19.8000000  | 170856     | 0                                                           | 0                   | 0             | 0              | 0           |
| purnia          | in      | Ganges Delta & Plain                               | 13                | 87.4666670   | 25.7833330  | 198474     | 0                                                           | 0                   | 0             | 0              | 0           |
| puruliya        | in      | Ganges Delta & Plain                               | 13                | 86.3666670   | 23.3333330  | 122544     | 0                                                           | 0                   | 0             | 0              | 0           |
| purwakarta      | id      | Southern Sumatra - Western Java                    | 8                 | 107.4433330  | -6.5569440  | 215816     | 0                                                           | 0                   | 0             | 0              | 0           |
| purwodadi       | id      | Central & Eastern Java                             | 4                 | 110.9158000  | -7.0868000  | 150278     | 0                                                           | 0                   | 0             | 0              | 0           |

Table S2 Cities and freshwater reptiles

| City        | Country | Freshwater Ecoregions of the World (FEOW) Region | Regional richness | Longitude   | Latitude    | Population | # of freshwater reptile species within 50 km of city centre |                     |               |                |             |
|-------------|---------|--------------------------------------------------|-------------------|-------------|-------------|------------|-------------------------------------------------------------|---------------------|---------------|----------------|-------------|
|             |         |                                                  |                   |             |             |            | Lizard species                                              | Crocodilian species | Snake species | Turtle species | All species |
| purwokerto  | id      | Indian Ocean Slope of Sumatra & Java             | 9                 | 109.2344440 | -7.4213890  | 217245     | 0                                                           | 0                   | 0             | 0              | 0           |
| purworejo   | id      | Central & Eastern Java                           | 4                 | 112.7388890 | -7.7636110  | 105077     | 0                                                           | 0                   | 0             | 0              | 0           |
| puyang      | cn      | Lower Huang He                                   | 0                 | 115.0052780 | 35.7027780  | 666322     | 0                                                           | 0                   | 0             | 0              | 0           |
| pyatigorsk  | ru      | Western Caspian Drainages                        | 0                 | 43.0594440  | 44.0486110  | 142868     | 0                                                           | 0                   | 0             | 0              | 0           |
| pyay        | mm      | Sitang - Irawaddy                                | 0                 | 95.2166667  | 18.8166667  | 135325     | 0                                                           | 0                   | 0             | 0              | 0           |
| qabis       | tn      | Mediterranean Northwest Africa                   | 2                 | 10.0981960  | 33.8814570  | 111070     | 0                                                           | 0                   | 0             | 0              | 0           |
| qalyub      | eg      | Nile Delta                                       | 0                 | 31.2052778  | 30.1830556  | 100521     | 0                                                           | 0                   | 0             | 0              | 0           |
| qandahar    | af      | Helmand - Sistan                                 | 0                 | 65.7101260  | 31.6133230  | 391230     | 0                                                           | 0                   | 0             | 0              | 0           |
| qarchak     | ir      | Namak                                            | 3                 | 51.5688890  | 35.4394440  | 251857     | 0                                                           | 0                   | 0             | 3              | 3           |
| qazvin      | ir      | Namak                                            | 3                 | 50.0049000  | 36.2797000  | 333652     | 0                                                           | 0                   | 0             | 0              | 0           |
| qena        | eg      | Lower Nile                                       | 1                 | 32.7272222  | 26.1700000  | 235390     | 1                                                           | 0                   | 0             | 0              | 1           |
| qianguo     | cn      | Songhua Jiang                                    | 0                 | 124.8567610 | 45.1171150  | 113611     | 0                                                           | 0                   | 0             | 0              | 0           |
| qianjiang   | cn      | Lower Yangtze                                    | 4                 | 112.8859500 | 30.4151280  | 179079     | 0                                                           | 0                   | 0             | 0              | 0           |
| qingdao     | cn      | Lower Huang He                                   | 0                 | 120.3719440 | 36.0986110  | 1642245    | 0                                                           | 0                   | 0             | 0              | 0           |
| qingyuan    | cn      | Xi Yang                                          | 15                | 113.0333330 | 23.7000000  | 151287     | 0                                                           | 0                   | 0             | 0              | 0           |
| qinhuangdao | cn      | Lower Huang He                                   | 0                 | 119.5883330 | 39.9316670  | 759718     | 0                                                           | 0                   | 0             | 0              | 0           |
| qinzhou     | cn      | Xi Yang                                          | 15                | 108.6166670 | 21.9500000  | 100996     | 0                                                           | 0                   | 0             | 0              | 0           |
| qiqihar     | cn      | Songhua Jiang                                    | 0                 | 123.9672220 | 47.3408330  | 882364     | 0                                                           | 0                   | 0             | 0              | 0           |
| qitaihe     | cn      | Songhua Jiang                                    | 0                 | 130.8500000 | 45.8000000  | 345033     | 0                                                           | 0                   | 0             | 0              | 0           |
| qom         | ir      | Namak                                            | 3                 | 50.8764000  | 34.6401000  | 1011103    | 0                                                           | 0                   | 0             | 0              | 0           |
| qostanay    | kz      | Ob                                               | 0                 | 63.5833330  | 53.1666670  | 230282     | 0                                                           | 0                   | 0             | 0              | 0           |
| quanzhou    | cn      | Coastal Fujian - Zeijang                         | 1                 | 118.5858330 | 24.9138890  | 184143     | 0                                                           | 0                   | 0             | 0              | 0           |
| quchan      | ir      | Turan Plain                                      | 1                 | 58.5095470  | 37.1059970  | 111765     | 0                                                           | 0                   | 0             | 0              | 0           |
| quebec      | ca      | St.Lawrence                                      | 10                | -71.2500000 | 46.8000000  | 645623     | 0                                                           | 0                   | 0             | 0              | 0           |
| queenstown  | za      | Southern Temperate Highveld                      | 5                 | 26.8753290  | -31.8975630 | 105315     | 0                                                           | 0                   | 0             | 0              | 0           |

Table S2 Cities and freshwater reptiles

| City           | Country | Freshwater Ecoregions of the World (FEOW) Region | Regional richness | Longitude    | Latitude    | Population | # of freshwater reptile species within 50 km of city centre |                     |               |                |             |
|----------------|---------|--------------------------------------------------|-------------------|--------------|-------------|------------|-------------------------------------------------------------|---------------------|---------------|----------------|-------------|
|                |         |                                                  |                   |              |             |            | Lizard species                                              | Crocodilian species | Snake species | Turtle species | All species |
| queimados      | br      | Paraiba do Sul                                   | 0                 | -43.5563160  | -22.7228970 | 135742     | 0                                                           | 0                   | 0             | 0              | 0           |
| quelimane      | mz      | Coastal East Africa                              | 4                 | 36.8883333   | -17.8786111 | 188964     | 0                                                           | 0                   | 0             | 0              | 0           |
| queluz         | pt      | Western Iberia                                   | 6                 | -9.2545120   | 38.7565720  | 103398     | 0                                                           | 0                   | 0             | 3              | 3           |
| queretaro      | mx      | Lerma - Chapala                                  | 10                | -100.3833330 | 20.6000000  | 611803     | 0                                                           | 0                   | 0             | 3              | 3           |
| quetta         | pk      | Baluchistan                                      | 1                 | 67.0097080   | 30.1990040  | 733970     | 0                                                           | 0                   | 0             | 0              | 0           |
| quetzaltenango | gt      | Chiapas - Fonseca                                | 11                | -91.5166670  | 14.8333330  | 132231     | 0                                                           | 0                   | 0             | 0              | 0           |
| quevedo        | ec      | North Andean Pacific Slopes - Rio Atrato         | 14                | -79.4500000  | -1.0333333  | 119436     | 0                                                           | 0                   | 0             | 0              | 0           |
| qui nhon       | vn      | Southern Annam                                   | 2                 | 109.2333330  | 13.7666670  | 210346     | 1                                                           | 0                   | 0             | 0              | 1           |
| quilpue        | cl      | South Andean Pacific Slopes                      | 0                 | -71.4494440  | -33.0450000 | 130264     | 0                                                           | 0                   | 0             | 0              | 0           |
| quito          | ec      | North Andean Pacific Slopes - Rio Atrato         | 14                | -78.5000000  | -0.2166667  | 1399814    | 1                                                           | 0                   | 0             | 0              | 1           |
| qujing         | cn      | Xi Yang                                          | 15                | 103.7833330  | 25.4833330  | 146015     | 0                                                           | 0                   | 0             | 0              | 0           |
| qunduz         | af      | Upper Amu Darya                                  | 0                 | 68.8570010   | 36.7289550  | 161943     | 0                                                           | 0                   | 0             | 0              | 0           |
| rabak          | sd      | Upper Nile                                       | 2                 | 32.7333333   | 13.1500000  | 135389     | 0                                                           | 0                   | 0             | 0              | 0           |
| rabat          | ma      | Atlantic Northwest Africa                        | 3                 | -6.8442680   | 34.0137840  | 1894386    | 0                                                           | 0                   | 0             | 1              | 1           |
| rach gia       | vn      | Mekong Delta                                     | 3                 | 105.0833330  | 10.0166670  | 228365     | 0                                                           | 0                   | 0             | 0              | 0           |
| radom          | pl      | Central & Western Europe                         | 13                | 21.1580900   | 51.4009630  | 226794     | 0                                                           | 0                   | 0             | 1              | 1           |
| rae bareli     | in      | Ganges Delta & Plain                             | 13                | 81.2333330   | 26.2166670  | 186451     | 0                                                           | 0                   | 0             | 0              | 0           |
| rafsanjan      | ir      | Kavir & Lut Deserts                              | 0                 | 55.9939000   | 30.4067000  | 147691     | 0                                                           | 0                   | 0             | 0              | 0           |
| raichur        | in      | Southern Deccan Plateau                          | 0                 | 77.3666670   | 16.2000000  | 225981     | 0                                                           | 0                   | 0             | 0              | 0           |
| raiganj        | in      | Ganges Delta & Plain                             | 13                | 88.1166670   | 25.6166670  | 170268     | 0                                                           | 0                   | 0             | 0              | 0           |
| raigarh        | in      | Northern Deccan Plateau                          | 2                 | 83.4000000   | 21.9000000  | 121291     | 0                                                           | 0                   | 0             | 0              | 0           |
| raipur         | in      | Northern Deccan Plateau                          | 2                 | 81.6333330   | 21.2333330  | 680066     | 0                                                           | 0                   | 0             | 0              | 0           |
| rajamahendri   | in      | Northern Deccan Plateau                          | 2                 | 81.7833330   | 16.9833330  | 304838     | 0                                                           | 0                   | 0             | 0              | 0           |
| rajapalaiyam   | in      | Western Ghats                                    | 4                 | 77.5666670   | 9.4500000   | 124179     | 0                                                           | 0                   | 0             | 0              | 0           |

Table S2 Cities and freshwater reptiles

| City             | Country | Freshwater Ecoregions of the World (FEOW) Region | Regional richness | Longitude    | Latitude    | Population | # of freshwater reptile species within 50 km of city centre |                     |               |                |             |
|------------------|---------|--------------------------------------------------|-------------------|--------------|-------------|------------|-------------------------------------------------------------|---------------------|---------------|----------------|-------------|
|                  |         |                                                  |                   |              |             |            | Lizard species                                              | Crocodilian species | Snake species | Turtle species | All species |
| rajkot           | in      | Lower & Middle Indus                             | 2                 | 70.7833330   | 22.3000000  | 1177434    | 0                                                           | 0                   | 0             | 0              | 0           |
| rajpur           | in      | Ganges Delta & Plain                             | 13                | 88.4180560   | 22.4125000  | 444549     | 1                                                           | 0                   | 0             | 0              | 1           |
| rajshahi         | bd      | Ganges Delta & Plain                             | 13                | 88.6000000   | 24.3666667  | 700206     | 0                                                           | 0                   | 0             | 0              | 0           |
| raleigh          | us      | Appalachian Piedmont                             | 26                | -78.6388889  | 35.7719444  | 338759     | 0                                                           | 0                   | 0             | 8              | 8           |
| ramat gan        | il      | Coastal Levant                                   | 1                 | 34.8141670   | 32.0805560  | 126864     | 0                                                           | 0                   | 0             | 1              | 1           |
| ramnicu valcea   | ro      | Dniester - Lower Danube                          | 3                 | 24.3666670   | 45.1000000  | 107558     | 0                                                           | 0                   | 0             | 0              | 0           |
| rampur           | in      | Ganges Delta & Plain                             | 13                | 79.0333330   | 28.8166670  | 296447     | 0                                                           | 0                   | 0             | 0              | 0           |
| rancaekek        | id      | Southern Sumatra - Western Java                  | 8                 | 107.7575000  | -6.9602780  | 152108     | 0                                                           | 0                   | 0             | 0              | 0           |
| rancagua         | cl      | South Andean Pacific Slopes                      | 0                 | -70.7444400  | -34.1708300 | 212696     | 0                                                           | 0                   | 0             | 0              | 0           |
| ranchi           | in      | Ganges Delta & Plain                             | 13                | 85.3333330   | 23.3500000  | 945079     | 0                                                           | 0                   | 0             | 0              | 0           |
| rancho cucamonga | us      | Southern California Coastal - Baja California    | 12                | -117.5922222 | 34.1063889  | 168557     | 0                                                           | 0                   | 0             | 6              | 6           |
| randfontein      | za      | Southern Temperate Highveld                      | 5                 | 27.6902660   | -26.1784290 | 133659     | 0                                                           | 1                   | 1             | 1              | 3           |
| ranghulu         | cn      | Songhua Jiang                                    | 0                 | 124.8666670  | 46.6500000  | 226298     | 0                                                           | 0                   | 0             | 0              | 0           |
| rangkasbitung    | id      | Southern Sumatra - Western Java                  | 8                 | 106.2494000  | -6.3591000  | 126904     | 0                                                           | 0                   | 0             | 0              | 0           |
| rangoon          | mm      | Sitang - Irawaddy                                | 0                 | 96.1666667   | 16.7833333  | 4477782    | 0                                                           | 0                   | 0             | 0              | 0           |
| rangpur          | bd      | Ganges Delta & Plain                             | 13                | 89.2500000   | 25.7500000  | 285586     | 0                                                           | 0                   | 0             | 0              | 0           |
| raniganj         | in      | Ganges Delta & Plain                             | 13                | 87.1333330   | 23.6166670  | 131274     | 0                                                           | 0                   | 0             | 0              | 0           |
| rantauprapat     | id      | Northern Central Sumatra - Western Malaysia      | 7                 | 99.8333330   | 2.1000000   | 103011     | 0                                                           | 0                   | 0             | 0              | 0           |
| rasht            | ir      | Kura - South Caspian Drainages                   | 4                 | 49.5831900   | 37.2807690  | 594619     | 0                                                           | 0                   | 0             | 0              | 0           |
| ratibon          | de      | Upper Danube                                     | 5                 | 12.0955560   | 49.0150000  | 129643     | 0                                                           | 0                   | 0             | 0              | 0           |
| ratlam           | in      | Namuda - Tapi                                    | 1                 | 75.0666670   | 23.3166670  | 236868     | 0                                                           | 0                   | 0             | 0              | 0           |
| raurkela         | in      | Northern Deccan Plateau                          | 2                 | 84.8833330   | 22.2000000  | 226886     | 0                                                           | 0                   | 0             | 0              | 0           |
| ravenna          | it      | Gulf of Venice Drainages                         | 8                 | 12.2011110   | 44.4175000  | 143396     | 0                                                           | 0                   | 0             | 2              | 2           |
| rawalpindi       | pk      | Lower & Middle Indus                             | 2                 | 73.0679000   | 33.6007000  | 1743599    | 0                                                           | 0                   | 0             | 0              | 0           |

Table S2 Cities and freshwater reptiles

| City               | Country | Freshwater Ecoregions of the World (FEOW) Region | Regional richness | Longitude    | Latitude    | Population | # of freshwater reptile species within 50 km of city centre |                     |               |                |             |
|--------------------|---------|--------------------------------------------------|-------------------|--------------|-------------|------------|-------------------------------------------------------------|---------------------|---------------|----------------|-------------|
|                    |         |                                                  |                   |              |             |            | Lizard species                                              | Crocodilian species | Snake species | Turtle species | All species |
| rawang             | my      | Northern Central Sumatra - Western Malaysia      | 7                 | 101.5767000  | 3.3213000   | 120484     | 1                                                           | 0                   | 0             | 1              | 2           |
| rayong             | th      | Eastern Gulf of Thailand Drainages               | 0                 | 101.2755030  | 12.6684620  | 119080     | 1                                                           | 0                   | 0             | 0              | 1           |
| reading            | gb      | Central & Western Europe                         | 13                | -1.0000000   | 51.4333330  | 244071     | 0                                                           | 0                   | 0             | 1              | 1           |
| recife             | br      | Northeastern Caatinga & Coastal Drainages        | 1                 | -34.9000000  | -8.0500000  | 1478118    | 0                                                           | 0                   | 0             | 0              | 0           |
| recklinghausen     | de      | Central & Western Europe                         | 13                | 7.2000000    | 51.6166670  | 122727     | 0                                                           | 0                   | 0             | 1              | 1           |
| reggio di calabria | it      | Italian Peninsula & Islands                      | 6                 | 15.6500000   | 38.1000000  | 181990     | 0                                                           | 0                   | 0             | 0              | 0           |
| regina             | ca      | Middle Saskatchewan                              | 1                 | -104.6166670 | 50.4500000  | 176182     | 0                                                           | 0                   | 0             | 1              | 1           |
| reims              | fr      | Central & Western Europe                         | 13                | 4.0333330    | 49.2500000  | 192688     | 0                                                           | 0                   | 0             | 0              | 0           |
| remscheid          | de      | Central & Western Europe                         | 13                | 7.2000000    | 51.1833330  | 118230     | 0                                                           | 0                   | 0             | 3              | 3           |
| rengasdengklok     | id      | Southern Sumatra - Western Java                  | 8                 | 107.2980560  | -6.1591670  | 201687     | 0                                                           | 2                   | 0             | 0              | 2           |
| rennes             | fr      | Central & Western Europe                         | 13                | -1.6742910   | 48.1119810  | 213334     | 0                                                           | 0                   | 0             | 1              | 1           |
| reno               | us      | Lahontan                                         | 3                 | -119.8127778 | 39.5297222  | 202142     | 0                                                           | 0                   | 0             | 1              | 1           |
| resende            | br      | Paraiba do Sul                                   | 0                 | -44.4575000  | -22.4679000 | 111515     | 0                                                           | 0                   | 0             | 0              | 0           |
| resistencia        | ar      | Lower Parana                                     | 9                 | -58.9838860  | -27.4605600 | 406967     | 0                                                           | 0                   | 0             | 0              | 0           |
| reutlingen         | de      | Central & Western Europe                         | 13                | 9.2166670    | 48.4833330  | 113625     | 0                                                           | 0                   | 0             | 4              | 4           |
| rewa               | in      | Ganges Delta & Plain                             | 13                | 81.3000000   | 24.5333330  | 208483     | 0                                                           | 0                   | 0             | 0              | 0           |
| rewari             | in      | Ganges Delta & Plain                             | 13                | 76.6166670   | 28.1833330  | 112087     | 0                                                           | 0                   | 0             | 0              | 0           |
| reykjavik          | is      | Iceland - Jan Mayen                              | 0                 | -21.9500000  | 64.1500000  | 113907     | 0                                                           | 0                   | 0             | 0              | 0           |
| reynosa            | mx      | Lower Rio Grande - Bravo                         | 14                | -98.2833330  | 26.0833330  | 498670     | 0                                                           | 1                   | 0             | 5              | 6           |
| rialto             | us      | Southern California Coastal - Baja California    | 12                | -117.3694444 | 34.1063889  | 101523     | 0                                                           | 0                   | 0             | 3              | 3           |
| ribeirao das neves | br      | S. Francisco                                     | 0                 | -44.1000000  | -19.7833330 | 406840     | 0                                                           | 0                   | 0             | 0              | 0           |
| ribeirao pires     | br      | Upper Parana                                     | 3                 | -46.4166670  | -23.7166670 | 111890     | 0                                                           | 0                   | 0             | 1              | 1           |
| ribeirao preto     | br      | Upper Parana                                     | 3                 | -47.8000000  | -21.1666670 | 551278     | 0                                                           | 0                   | 0             | 0              | 0           |

Table S2 Cities and freshwater reptiles

| City           | Country | Freshwater Ecoregions of the World (FEOW) Region | Regional richness | Longitude    | Latitude    | Population | # of freshwater reptile species within 50 km of city centre |                     |               |                |             |
|----------------|---------|--------------------------------------------------|-------------------|--------------|-------------|------------|-------------------------------------------------------------|---------------------|---------------|----------------|-------------|
|                |         |                                                  |                   |              |             |            | Lizard species                                              | Crocodilian species | Snake species | Turtle species | All species |
| richards bay   | za      | Zambezian Lowveld                                | 10                | 32.0540050   | -28.7754170 | 253156     | 1                                                           | 1                   | 2             | 3              | 7           |
| richardson     | us      | Sabine - Galveston                               | 29                | -96.7294444  | 32.9480556  | 104791     | 0                                                           | 1                   | 1             | 13             | 15          |
| richmond       | us      | Appalachian Piedmont                             | 26                | -77.4605556  | 37.5536111  | 190886     | 0                                                           | 0                   | 0             | 6              | 6           |
| richmond       | us      | Sacramento - San Joaquin                         | 10                | -122.3466667 | 37.9358333  | 103041     | 0                                                           | 0                   | 0             | 6              | 6           |
| riga           | lv      | Southern Baltic Lowlands                         | 0                 | 24.1000000   | 56.9500000  | 742570     | 0                                                           | 0                   | 0             | 0              | 0           |
| rijeka         | hr      | Dalmatia                                         | 2                 | 14.4091667   | 45.3430556  | 141173     | 0                                                           | 0                   | 0             | 0              | 0           |
| rimini         | it      | Gulf of Venice Drainages                         | 8                 | 12.5808330   | 44.0633330  | 132031     | 0                                                           | 0                   | 0             | 2              | 2           |
| rio branco     | br      | Amazonas Lowlands                                | 19                | -67.8000000  | -9.9666670  | 257645     | 0                                                           | 1                   | 0             | 0              | 1           |
| rio claro      | br      | Upper Parana                                     | 3                 | -47.5500000  | -22.4000000 | 180151     | 0                                                           | 1                   | 0             | 1              | 2           |
| rio cuarto     | ar      | Mar Chiquita - Salinas Grandes                   | 1                 | -64.3499180  | -33.1306710 | 174058     | 0                                                           | 0                   | 0             | 0              | 0           |
| rio de janeiro | br      | Fluminense                                       | 1                 | -43.2333330  | -22.9000000 | 6023742    | 0                                                           | 0                   | 0             | 0              | 0           |
| rio grande     | br      | Laguna dos Patos                                 | 2                 | -52.0833330  | -32.0333330 | 187842     | 0                                                           | 0                   | 0             | 0              | 0           |
| riobamba       | ec      | Amazonas High Andes                              | 1                 | -78.6333333  | -1.6666667  | 124478     | 0                                                           | 0                   | 0             | 0              | 0           |
| rishra         | in      | Ganges Delta & Plain                             | 13                | 88.3477780   | 22.7141670  | 117026     | 1                                                           | 0                   | 0             | 0              | 1           |
| riverside      | us      | Southern California Coastal - Baja California    | 12                | -117.3952778 | 33.9533333  | 297554     | 0                                                           | 0                   | 0             | 3              | 3           |
| rivne          | ua      | Dnieper - South Bug                              | 2                 | 26.2274300   | 50.6230790  | 255104     | 0                                                           | 0                   | 0             | 0              | 0           |
| riyadh         | sa      | Arabian Interior                                 | 1                 | 46.7152200   | 24.6536640  | 3469290    | 0                                                           | 0                   | 0             | 0              | 0           |
| rizhao         | cn      | Lower Yangtze                                    | 4                 | 119.5458330  | 35.3902780  | 246387     | 0                                                           | 0                   | 0             | 0              | 0           |
| robertsonpet   | in      | Southeastern Ghats                               | 3                 | 78.2833330   | 12.9666670  | 135229     | 0                                                           | 0                   | 0             | 0              | 0           |
| rochester      | us      | Laurentian Great Lakes                           | 16                | -77.6158333  | 43.1547222  | 211354     | 0                                                           | 0                   | 0             | 3              | 3           |
| rockford       | us      | Upper Mississippi                                | 20                | -89.0938889  | 42.2711111  | 152765     | 0                                                           | 0                   | 0             | 4              | 4           |
| rohtak         | in      | Ganges Delta & Plain                             | 13                | 76.5666670   | 28.9000000  | 317266     | 0                                                           | 0                   | 0             | 0              | 0           |
| rome           | it      | Italian Peninsula & Islands                      | 6                 | 12.4833330   | 41.9000000  | 2643736    | 0                                                           | 0                   | 0             | 1              | 1           |
| rondonopolis   | br      | Paraguay                                         | 8                 | -54.6333330  | -16.4666670 | 152921     | 0                                                           | 0                   | 0             | 0              | 0           |
| rongcheng      | cn      | Coastal Fujian - Zeijang                         | 1                 | 116.3641590  | 23.5288580  | 1001985    | 0                                                           | 0                   | 0             | 0              | 0           |

Table S2 Cities and freshwater reptiles

| City           | Country | Freshwater Ecoregions of the World (FEOW) Region | Regional richness | Longitude    | Latitude    | Population | # of freshwater reptile species within 50 km of city centre |                     |               |                |             |
|----------------|---------|--------------------------------------------------|-------------------|--------------|-------------|------------|-------------------------------------------------------------|---------------------|---------------|----------------|-------------|
|                |         |                                                  |                   |              |             |            | Lizard species                                              | Crocodilian species | Snake species | Turtle species | All species |
| rongcheng      | cn      | Lower Yangtze                                    | 4                 | 112.9514410  | 29.8450470  | 108908     | 0                                                           | 0                   | 0             | 0              | 0           |
| rongcheng      | cn      | Middle Yangtze                                   | 1                 | 104.0166670  | 26.2666670  | 102157     | 0                                                           | 0                   | 0             | 0              | 0           |
| rosario        | ar      | Lower Parana                                     | 9                 | -60.6393170  | -32.9468180 | 1218497    | 0                                                           | 0                   | 0             | 0              | 0           |
| roseville      | us      | Sacramento - San Joaquin                         | 10                | -121.2869444 | 38.7522222  | 112647     | 0                                                           | 0                   | 0             | 2              | 2           |
| rostock        | de      | Central & Western Europe                         | 13                | 12.1333330   | 54.0833330  | 196833     | 0                                                           | 0                   | 0             | 0              | 0           |
| rostov-na-donu | ru      | Don                                              | 1                 | 39.7232840   | 47.2313500  | 1074495    | 0                                                           | 0                   | 0             | 0              | 0           |
| rotherham      | gb      | Central & Western Europe                         | 13                | -1.3500000   | 53.4333330  | 117619     | 0                                                           | 0                   | 0             | 1              | 1           |
| rotterdam      | nl      | Central & Western Europe                         | 13                | 4.5000000    | 51.9166670  | 603851     | 0                                                           | 0                   | 0             | 1              | 1           |
| rouen          | fr      | Central & Western Europe                         | 13                | 1.0833330    | 49.4333330  | 108101     | 0                                                           | 0                   | 0             | 0              | 0           |
| roxas          | ph      | Northern Philippine Islands                      | 1                 | 122.7511110  | 11.5852780  | 102688     | 0                                                           | 0                   | 0             | 0              | 0           |
| rubtsovsk      | ru      | Ob                                               | 0                 | 81.2500000   | 51.5000000  | 161067     | 0                                                           | 0                   | 0             | 0              | 0           |
| ruda slaska    | pl      | Central & Western Europe                         | 13                | 18.8551560   | 50.3079410  | 146189     | 0                                                           | 0                   | 0             | 1              | 1           |
| ruian          | cn      | Coastal Fujian - Zeijang                         | 1                 | 120.6585880  | 27.7760470  | 125208     | 0                                                           | 0                   | 0             | 0              | 0           |
| ruiru          | ke      | Tana, Athi & Coastal Drainages                   | 5                 | 36.9666667   | -1.1500000  | 114636     | 1                                                           | 1                   | 1             | 1              | 4           |
| ruse           | bg      | Dniester - Lower Danube                          | 3                 | 25.9708333   | 43.8563889  | 157519     | 0                                                           | 0                   | 0             | 1              | 1           |
| rustenburg     | za      | Southern Temperate Highveld                      | 5                 | 27.2420790   | -25.6675620 | 124064     | 0                                                           | 1                   | 0             | 2              | 3           |
| ryazan         | ru      | Volga - Ural                                     | 0                 | 39.6916000   | 54.6269000  | 520177     | 0                                                           | 0                   | 0             | 0              | 0           |
| rybinsk        | ru      | Volga - Ural                                     | 0                 | 38.8425940   | 58.0445980  | 216726     | 0                                                           | 0                   | 0             | 0              | 0           |
| rybnik         | pl      | Central & Western Europe                         | 13                | 18.5474790   | 50.0920760  | 142510     | 0                                                           | 0                   | 0             | 1              | 1           |
| rzeszow        | pl      | Central & Western Europe                         | 13                | 22.0049490   | 50.0372460  | 158382     | 0                                                           | 0                   | 0             | 0              | 0           |
| saarbrücken    | de      | Central & Western Europe                         | 13                | 7.0000000    | 49.2333330  | 181779     | 0                                                           | 0                   | 0             | 3              | 3           |
| sabadell       | es      | Eastern Iberia                                   | 13                | 2.1094230    | 41.5432900  | 198589     | 0                                                           | 0                   | 0             | 11             | 11          |
| sabara         | br      | S. Francisco                                     | 0                 | -43.8000000  | -19.9000000 | 158359     | 0                                                           | 0                   | 0             | 0              | 0           |
| sabha          | ly      | Sahara                                           | 1                 | 14.4333333   | 27.0333333  | 126387     | 0                                                           | 0                   | 0             | 0              | 0           |
| sabratah       | ly      | Sahara                                           | 1                 | 12.4847222   | 32.7919444  | 102037     | 0                                                           | 0                   | 0             | 0              | 0           |

Table S2 Cities and freshwater reptiles

| City             | Country | Freshwater Ecoregions of the World (FEOW) Region | Regional richness | Longitude    | Latitude    | Population | # of freshwater reptile species within 50 km of city centre |                     |               |                |             |
|------------------|---------|--------------------------------------------------|-------------------|--------------|-------------|------------|-------------------------------------------------------------|---------------------|---------------|----------------|-------------|
|                  |         |                                                  |                   |              |             |            | Lizard species                                              | Crocodilian species | Snake species | Turtle species | All species |
| sabzevar         | ir      | Kavir & Lut Deserts                              | 0                 | 57.6819060   | 36.2125980  | 226208     | 0                                                           | 0                   | 0             | 0              | 0           |
| sacramento       | us      | Sacramento - San Joaquin                         | 10                | -121.4933333 | 38.5816667  | 467898     | 0                                                           | 0                   | 0             | 2              | 2           |
| sadiqabad        | pk      | Lower & Middle Indus                             | 2                 | 70.1306460   | 28.3062300  | 189931     | 0                                                           | 0                   | 0             | 0              | 0           |
| safaqis          | tn      | Mediterranean Northwest Africa                   | 2                 | 10.7602780   | 34.7405560  | 276293     | 0                                                           | 0                   | 0             | 0              | 0           |
| saga             | jp      | Honshu - Shikoku - Kyushu                        | 5                 | 130.2987990  | 33.2493220  | 165237     | 0                                                           | 0                   | 0             | 0              | 0           |
| sagamihara       | jp      | Honshu - Shikoku - Kyushu                        | 5                 | 139.3544440  | 35.5530560  | 648811     | 0                                                           | 0                   | 0             | 3              | 3           |
| sagar            | in      | Ganges Delta & Plain                             | 13                | 78.7166670   | 23.8333330  | 247359     | 0                                                           | 0                   | 0             | 0              | 0           |
| saharanpur       | in      | Ganges Delta & Plain                             | 13                | 77.5500000   | 29.9666670  | 484921     | 0                                                           | 0                   | 0             | 0              | 0           |
| saharsa          | in      | Ganges Delta & Plain                             | 13                | 86.6000000   | 25.8833330  | 145779     | 0                                                           | 0                   | 0             | 0              | 0           |
| sahiwal          | pk      | Lower & Middle Indus                             | 2                 | 73.1000000   | 30.6666670  | 235765     | 0                                                           | 0                   | 0             | 0              | 0           |
| saint helens     | gb      | Central & Western Europe                         | 13                | -2.7333330   | 53.4500000  | 102555     | 0                                                           | 0                   | 0             | 1              | 1           |
| saint louis      | us      | Upper Mississippi                                | 20                | -90.1977778  | 38.6272222  | 320916     | 0                                                           | 0                   | 0             | 5              | 5           |
| saint paul       | us      | Upper Mississippi                                | 20                | -93.0930556  | 44.9444444  | 274792     | 0                                                           | 0                   | 0             | 6              | 6           |
| saint petersburg | us      | Florida Peninsula                                | 30                | -82.6794444  | 27.7705556  | 246316     | 0                                                           | 1                   | 1             | 7              | 9           |
| saint petersburg | ru      | Southern Baltic Lowlands                         | 0                 | 30.2641670   | 59.8944440  | 4039751    | 0                                                           | 1                   | 1             | 7              | 9           |
| saint-denis      | re      | Mascarenes                                       | 0                 | 55.4666667   | -20.8666667 | 137198     | 0                                                           | 0                   | 0             | 0              | 0           |
| saint-etienne    | fr      | Central & Western Europe                         | 13                | 4.3910510    | 45.4353820  | 170416     | 0                                                           | 0                   | 0             | 1              | 1           |
| saint-louis      | sn      | Senegal - Gambia                                 | 4                 | -16.4952778  | 16.0188889  | 176048     | 0                                                           | 0                   | 0             | 0              | 0           |
| saitama          | jp      | Honshu - Shikoku - Kyushu                        | 5                 | 139.6774700  | 35.8955340  | 1077730    | 0                                                           | 0                   | 0             | 3              | 3           |
| sakai            | jp      | Honshu - Shikoku - Kyushu                        | 5                 | 135.4666670  | 34.5833330  | 782347     | 0                                                           | 0                   | 0             | 1              | 1           |
| sakata           | jp      | Honshu - Shikoku - Kyushu                        | 5                 | 139.8550000  | 38.9166670  | 100446     | 0                                                           | 0                   | 0             | 0              | 0           |
| sakura           | jp      | Honshu - Shikoku - Kyushu                        | 5                 | 140.2333330  | 35.7166670  | 182553     | 0                                                           | 0                   | 0             | 3              | 3           |
| salalah          | om      | Southwestern Arabian Coast                       | 1                 | 54.0827778   | 17.0175000  | 178469     | 0                                                           | 0                   | 0             | 0              | 0           |
| salamanca        | mx      | Lerma - Chapala                                  | 10                | -101.2000000 | 20.5666670  | 138620     | 0                                                           | 0                   | 0             | 2              | 2           |
| salamanca        | es      | Western Iberia                                   | 6                 | -5.6620200   | 40.9681000  | 155175     | 0                                                           | 0                   | 0             | 2              | 2           |

Table S2 Cities and freshwater reptiles

| City           | Country | Freshwater Ecoregions of the World (FEOW) Region | Regional richness | Longitude    | Latitude    | Population | # of freshwater reptile species within 50 km of city centre |                     |               |                |             |
|----------------|---------|--------------------------------------------------|-------------------|--------------|-------------|------------|-------------------------------------------------------------|---------------------|---------------|----------------|-------------|
|                |         |                                                  |                   |              |             |            | Lizard species                                              | Crocodilian species | Snake species | Turtle species | All species |
| salatiga       | id      | Central & Eastern Java                           | 4                 | 110.5077780  | -7.3213890  | 172664     | 0                                                           | 0                   | 1             | 0              | 1           |
| salavat        | ru      | Volga - Ural                                     | 0                 | 55.9077290   | 53.3836500  | 159896     | 0                                                           | 0                   | 0             | 0              | 0           |
| salem          | us      | Columbia Unglaciaded                             | 4                 | -123.0338889 | 44.9430556  | 146922     | 0                                                           | 0                   | 0             | 3              | 3           |
| salerno        | it      | Italian Peninsula & Islands                      | 6                 | 14.7833330   | 40.6833330  | 144147     | 0                                                           | 0                   | 0             | 0              | 0           |
| salihorsk      | by      | Dnieper - South Bug                              | 2                 | 27.5333333   | 52.8000000  | 101614     | 0                                                           | 0                   | 0             | 0              | 0           |
| salinas        | us      | Sacramento - San Joaquin                         | 10                | -121.6544444 | 36.6777778  | 148691     | 0                                                           | 0                   | 0             | 3              | 3           |
| salt lake city | us      | Bonneville                                       | 1                 | -111.8902778 | 40.7608333  | 178026     | 0                                                           | 0                   | 0             | 1              | 1           |
| salta          | ar      | Lower Parana                                     | 9                 | -65.4116640  | -24.7858960 | 548288     | 0                                                           | 0                   | 0             | 0              | 0           |
| saltillo       | mx      | Rio San Juan (Mexico)                            | 8                 | -101.0000000 | 25.4166670  | 621270     | 0                                                           | 0                   | 0             | 2              | 2           |
| salto          | uy      | Lower Uruguay                                    | 3                 | -57.9666667  | -31.3833333 | 104667     | 0                                                           | 0                   | 0             | 0              | 0           |
| salvador       | br      | Northeastern Mata Atlantica                      | 1                 | -38.5166670  | -12.9833330 | 2711903    | 0                                                           | 0                   | 0             | 0              | 0           |
| salzburg       | at      | Upper Danube                                     | 5                 | 13.0333330   | 47.8000000  | 145310     | 0                                                           | 0                   | 0             | 0              | 0           |
| salzgitter     | de      | Central & Western Europe                         | 13                | 10.3333330   | 52.0833330  | 111622     | 0                                                           | 0                   | 0             | 2              | 2           |
| samara         | ru      | Volga - Ural                                     | 0                 | 50.1182000   | 53.1835000  | 1134742    | 0                                                           | 0                   | 0             | 0              | 0           |
| samarinda      | id      | Eastern Borneo                                   | 3                 | 117.1500000  | -0.5000000  | 355223     | 0                                                           | 0                   | 0             | 1              | 1           |
| samarkand      | uz      | Middle Amu Darya                                 | 1                 | 66.9597222   | 39.6541667  | 319404     | 0                                                           | 0                   | 0             | 0              | 0           |
| sambalpur      | in      | Northern Deccan Plateau                          | 2                 | 83.9666670   | 21.4500000  | 162901     | 0                                                           | 0                   | 0             | 0              | 0           |
| sambhal        | in      | Ganges Delta & Plain                             | 13                | 78.5500000   | 28.5833330  | 196129     | 0                                                           | 0                   | 0             | 0              | 0           |
| samsun         | tr      | Northern Anatolia                                | 2                 | 36.3300000   | 41.2866670  | 394261     | 0                                                           | 0                   | 0             | 0              | 0           |
| samut prakan   | th      | Chao Phraya                                      | 12                | 100.5967780  | 13.6004170  | 388921     | 1                                                           | 0                   | 0             | 7              | 8           |
| san antonio    | us      | East Texas Gulf                                  | 34                | -98.4933333  | 29.4238889  | 1256810    | 0                                                           | 1                   | 1             | 6              | 8           |
| san bernardino | us      | Southern California Coastal - Baja California    | 12                | -117.2888889 | 34.1083333  | 202381     | 0                                                           | 0                   | 0             | 2              | 2           |
| san bernardo   | cl      | South Andean Pacific Slopes                      | 0                 | -70.7166670  | -33.6000000 | 249856     | 0                                                           | 0                   | 0             | 0              | 0           |

Table S2 Cities and freshwater reptiles

| City                     | Country | Freshwater Ecoregions of the World (FEOW) Region | Regional richness | Longitude    | Latitude    | Population | # of freshwater reptile species within 50 km of city centre |                     |               |                |             |
|--------------------------|---------|--------------------------------------------------|-------------------|--------------|-------------|------------|-------------------------------------------------------------|---------------------|---------------|----------------|-------------|
|                          |         |                                                  |                   |              |             |            | Lizard species                                              | Crocodilian species | Snake species | Turtle species | All species |
| san carlos de bariloche  | ar      | Patagonia                                        | 0                 | -71.3013690  | -41.1402930 | 110044     | 0                                                           | 0                   | 0             | 0              | 0           |
| san cristobal            | do      | Hispaniola                                       | 5                 | -70.1000000  | 18.4166667  | 154045     | 0                                                           | 0                   | 0             | 3              | 3           |
| san cristobal            | ve      | Orinoco High Andes                               | 2                 | -72.2250000  | 7.7669444   | 246620     | 0                                                           | 0                   | 0             | 3              | 3           |
| san diego                | us      | Southern California Coastal - Baja California    | 12                | -117.1563889 | 32.7152778  | 1287050    | 0                                                           | 0                   | 0             | 5              | 5           |
| san fernando             | ph      | Northern Philippine Islands                      | 1                 | 120.6898000  | 15.0286000  | 251157     | 0                                                           | 0                   | 0             | 0              | 0           |
| san francisco            | us      | Oregon & Northern California Coastal             | 7                 | -122.4183333 | 37.7750000  | 732072     | 0                                                           | 0                   | 0             | 7              | 7           |
| san francisco de macoris | do      | Hispaniola                                       | 5                 | -70.2500000  | 19.3000000  | 124772     | 0                                                           | 0                   | 0             | 0              | 0           |
| san jose                 | cr      | Estero Real - Tempisque                          | 7                 | -84.0833330  | 9.9333330   | 335056     | 0                                                           | 0                   | 0             | 5              | 5           |
| san jose                 | us      | Sacramento - San Joaquin                         | 10                | -121.8938889 | 37.3394444  | 897460     | 0                                                           | 0                   | 0             | 5              | 5           |
| san juan                 | ar      | Cuyan - Desaguadero                              | 0                 | -68.5363890  | -31.5375000 | 469958     | 0                                                           | 0                   | 0             | 2              | 2           |
| san juan                 | us      | Puerto Rico - Virgin Islands                     | 2                 | -66.1061111  | 18.4683333  | 418140     | 0                                                           | 0                   | 0             | 2              | 2           |
| san juan del rio         | mx      | Panuco                                           | 12                | -100.0000000 | 20.3833330  | 118178     | 0                                                           | 0                   | 0             | 4              | 4           |
| san juan sacatepequez    | gt      | Quintana Roo - Motagua                           | 16                | -90.6441670  | 14.7188890  | 133613     | 1                                                           | 0                   | 0             | 0              | 1           |
| san lorenzo              | py      | Paraguay                                         | 8                 | -57.5333330  | -25.3333330 | 227898     | 0                                                           | 1                   | 0             | 0              | 1           |
| san luis                 | ar      | Cuyan - Desaguadero                              | 0                 | -66.3356270  | -33.2950120 | 184869     | 0                                                           | 0                   | 0             | 0              | 0           |
| san luis potosi          | mx      | Llanos El Salado                                 | 6                 | -100.9833330 | 22.1500000  | 677726     | 0                                                           | 0                   | 0             | 3              | 3           |
| san luis rio colorado    | mx      | Sonora                                           | 9                 | -114.7766670 | 32.4630560  | 139261     | 0                                                           | 0                   | 0             | 1              | 1           |
| san martin               | ar      | Cuyan - Desaguadero                              | 0                 | -68.4681380  | -33.0810310 | 107554     | 0                                                           | 0                   | 0             | 0              | 0           |
| san mateo                | ph      | Northern Philippine Islands                      | 1                 | 121.1236000  | 14.6982000  | 134515     | 0                                                           | 0                   | 0             | 0              | 0           |
| san miguelito            | pa      | Rio Tuira                                        | 5                 | -79.5000000  | 9.0333333   | 321516     | 2                                                           | 2                   | 0             | 3              | 7           |
| san nicolas              | ar      | Lower Parana                                     | 9                 | -60.2252330  | -33.3357840 | 130705     | 0                                                           | 0                   | 0             | 0              | 0           |
| san nicolas de los garza | mx      | Rio San Juan (Mexico)                            | 8                 | -100.3000000 | 25.7500000  | 507837     | 0                                                           | 0                   | 0             | 4              | 4           |

Table S2 Cities and freshwater reptiles

| City                     | Country | Freshwater Ecoregions of the World (FEOW) Region | Regional richness | Longitude    | Latitude    | Population | # of freshwater reptile species within 50 km of city centre |                     |               |                |             |
|--------------------------|---------|--------------------------------------------------|-------------------|--------------|-------------|------------|-------------------------------------------------------------|---------------------|---------------|----------------|-------------|
|                          |         |                                                  |                   |              |             |            | Lizard species                                              | Crocodilian species | Snake species | Turtle species | All species |
| san pablo                | ph      | Northern Philippine Islands                      | 1                 | 121.3256000  | 14.0683000  | 207572     | 0                                                           | 0                   | 0             | 0              | 0           |
| san pablo de las salinas | mx      | Lerma - Chapala                                  | 10                | -99.0963890  | 19.6658330  | 173565     | 0                                                           | 0                   | 0             | 5              | 5           |
| san pedro                | ph      | Northern Philippine Islands                      | 1                 | 121.0473000  | 14.3595000  | 270223     | 0                                                           | 0                   | 0             | 0              | 0           |
| san pedro de macoris     | do      | Hispaniola                                       | 5                 | -69.3000000  | 18.4500000  | 217901     | 0                                                           | 0                   | 0             | 1              | 1           |
| san pedro sula           | hn      | Mosquitia                                        | 3                 | -88.0333333  | 15.5000000  | 489506     | 0                                                           | 0                   | 0             | 0              | 0           |
| san rafael               | ar      | Cuyan - Desaguadero                              | 0                 | -68.3300660  | -34.6177170 | 125033     | 0                                                           | 0                   | 0             | 0              | 0           |
| san salvador             | sv      | Chiapas - Fonseca                                | 11                | -89.2030556  | 13.7086111  | 526013     | 1                                                           | 0                   | 0             | 1              | 2           |
| sanandaj                 | ir      | Upper Tigris & Euphrates                         | 3                 | 46.9923000   | 35.3144000  | 349200     | 0                                                           | 0                   | 0             | 0              | 0           |
| sanbu                    | cn      | Xi Yang                                          | 15                | 112.6880880  | 22.3607800  | 140454     | 0                                                           | 0                   | 0             | 0              | 0           |
| sanchung                 | tw      | Western Taiwan                                   | 2                 | 121.4638889  | 25.0630556  | 360829     | 0                                                           | 0                   | 0             | 2              | 2           |
| sancti spiritus          | cu      | Cuba - Cayman Islands                            | 2                 | -79.4425000  | 21.9297222  | 127073     | 0                                                           | 0                   | 0             | 0              | 0           |
| sanda                    | jp      | Honshu - Shikoku - Kyushu                        | 5                 | 135.2333330  | 34.8833330  | 132864     | 0                                                           | 0                   | 0             | 2              | 2           |
| sandakan                 | my      | Northeastern Borneo                              | 7                 | 118.1179000  | 5.8402000   | 392332     | 1                                                           | 1                   | 0             | 2              | 4           |
| sanhsia                  | tw      | Western Taiwan                                   | 2                 | 121.3666667  | 24.9333333  | 100698     | 0                                                           | 0                   | 0             | 2              | 2           |
| sanmenxia                | cn      | Lower Huang He                                   | 0                 | 111.1813890  | 34.7747220  | 357767     | 0                                                           | 0                   | 0             | 0              | 0           |
| sanming                  | cn      | Coastal Fujian - Zeijang                         | 1                 | 117.6186110  | 26.2486110  | 209444     | 0                                                           | 0                   | 0             | 0              | 0           |
| san-pedro                | ci      | Southern Upper Guinea                            | 0                 | -6.6363010   | 4.7485080   | 195873     | 0                                                           | 0                   | 0             | 0              | 0           |
| santa ana                | sv      | Chiapas - Fonseca                                | 11                | -89.5597222  | 13.9941667  | 176671     | 0                                                           | 0                   | 0             | 7              | 7           |
| santa ana                | us      | Southern California Coastal - Baja California    | 12                | -117.8669444 | 33.7455556  | 343054     | 0                                                           | 0                   | 0             | 7              | 7           |
| santa catarina           | mx      | Rio San Juan (Mexico)                            | 8                 | -100.4666670 | 25.6833330  | 254483     | 0                                                           | 0                   | 0             | 3              | 3           |
| santa clara              | cu      | Cuba - Cayman Islands                            | 2                 | -79.7666667  | 22.1666667  | 250518     | 0                                                           | 0                   | 0             | 5              | 5           |
| santa clara              | us      | Sacramento - San Joaquin                         | 10                | -121.9541667 | 37.3541667  | 102250     | 0                                                           | 0                   | 0             | 5              | 5           |
| santa clarita            | us      | Southern California Coastal - Baja California    | 12                | -118.5416667 | 34.3916667  | 168927     | 0                                                           | 0                   | 0             | 5              | 5           |

Table S2 Cities and freshwater reptiles

| City                   | Country | Freshwater Ecoregions of the World (FEOW) Region | Regional richness | Longitude    | Latitude    | Population | # of freshwater reptile species within 50 km of city centre |                     |               |                |             |
|------------------------|---------|--------------------------------------------------|-------------------|--------------|-------------|------------|-------------------------------------------------------------|---------------------|---------------|----------------|-------------|
|                        |         |                                                  |                   |              |             |            | Lizard species                                              | Crocodilian species | Snake species | Turtle species | All species |
| santa cruz             | ph      | Northern Philippine Islands                      | 1                 | 121.4161000  | 14.2814000  | 108135     | 0                                                           | 0                   | 0             | 0              | 0           |
| santa cruz de tenerife | es      | Canary Islands                                   | 2                 | -16.2806160  | 28.4602380  | 193852     | 0                                                           | 0                   | 0             | 1              | 1           |
| santa cruz do sul      | br      | Laguna dos Patos                                 | 2                 | -52.4333330  | -29.7166670 | 106115     | 0                                                           | 0                   | 0             | 0              | 0           |
| santa fe               | ar      | Lower Parana                                     | 9                 | -60.7010360  | -31.6294840 | 456044     | 0                                                           | 0                   | 0             | 1              | 1           |
| santa luzia            | br      | S. Francisco                                     | 0                 | -43.8666670  | -19.7833330 | 243506     | 0                                                           | 0                   | 0             | 0              | 0           |
| santa maria            | br      | Laguna dos Patos                                 | 2                 | -53.8000000  | -29.6833330 | 249224     | 0                                                           | 0                   | 0             | 0              | 0           |
| santa marta            | co      | Magdalena - Sinu                                 | 15                | -74.1990400  | 11.2407910  | 431788     | 1                                                           | 2                   | 0             | 2              | 5           |
| santa rita             | br      | Northeastern Caatinga & Coastal Drainages        | 1                 | -34.9666670  | -7.1333330  | 119895     | 0                                                           | 0                   | 0             | 1              | 1           |
| santa rosa             | ph      | Northern Philippine Islands                      | 1                 | 121.1107390  | 14.3055790  | 216650     | 0                                                           | 0                   | 0             | 3              | 3           |
| santa rosa             | us      | Sacramento - San Joaquin                         | 10                | -122.7133333 | 38.4405556  | 155118     | 0                                                           | 0                   | 0             | 3              | 3           |
| santa teresa           | ve      | South America Caribbean Drainages - Trinidad     | 6                 | -66.6636111  | 10.2313889  | 279424     | 0                                                           | 0                   | 0             | 0              | 0           |
| santander              | es      | Cantabric Coast - Languedoc                      | 10                | -3.8044440   | 43.4647220  | 185209     | 0                                                           | 0                   | 0             | 2              | 2           |
| santarem               | br      | Amazonas Lowlands                                | 19                | -54.7000000  | -2.4333330  | 189053     | 0                                                           | 0                   | 0             | 0              | 0           |
| santiago               | do      | Hispaniola                                       | 5                 | -70.7000000  | 19.4500000  | 555911     | 0                                                           | 0                   | 0             | 0              | 0           |
| santiago               | ph      | Northern Philippine Islands                      | 1                 | 121.5570000  | 16.6928000  | 108427     | 0                                                           | 0                   | 0             | 0              | 0           |
| santiago               | cl      | South Andean Pacific Slopes                      | 0                 | -70.6666670  | -33.4500000 | 4837248    | 0                                                           | 0                   | 0             | 0              | 0           |
| santiago de cuba       | cu      | Cuba - Cayman Islands                            | 2                 | -75.8219444  | 20.0247222  | 555878     | 0                                                           | 0                   | 0             | 0              | 0           |
| santiago del estero    | ar      | Mar Chiquita - Salinas Grandes                   | 1                 | -64.2614890  | -27.7951120 | 407636     | 0                                                           | 0                   | 0             | 0              | 0           |
| santo andre            | br      | Upper Parana                                     | 3                 | -46.5166670  | -23.6666670 | 662387     | 0                                                           | 0                   | 0             | 1              | 1           |
| santo domingo          | do      | Hispaniola                                       | 5                 | -69.9000000  | 18.4666667  | 2202016    | 0                                                           | 0                   | 0             | 3              | 3           |
| santo domingo          | ec      | North Andean Pacific Slopes - Rio Atrato         | 14                | -79.1500000  | -0.2500000  | 200421     | 0                                                           | 0                   | 0             | 3              | 3           |
| santos                 | br      | Ribeira de Iguape                                | 1                 | -46.3333330  | -23.9500000 | 411411     | 0                                                           | 0                   | 0             | 1              | 1           |
| sao bernardo do campo  | br      | Upper Parana                                     | 3                 | -46.5500000  | -23.7000000 | 743386     | 0                                                           | 0                   | 0             | 1              | 1           |

Table S2 Cities and freshwater reptiles

| City                  | Country | Freshwater Ecoregions of the World (FEOW) Region | Regional richness | Longitude    | Latitude    | Population | # of freshwater reptile species within 50 km of city centre |                     |               |                |             |
|-----------------------|---------|--------------------------------------------------|-------------------|--------------|-------------|------------|-------------------------------------------------------------|---------------------|---------------|----------------|-------------|
|                       |         |                                                  |                   |              |             |            | Lizard species                                              | Crocodilian species | Snake species | Turtle species | All species |
| sao caetano do sul    | br      | Upper Parana                                     | 3                 | -46.5666670  | -23.6000000 | 136456     | 0                                                           | 0                   | 0             | 1              | 1           |
| sao carlos            | br      | Upper Parana                                     | 3                 | -47.9000000  | -22.0166670 | 205039     | 0                                                           | 0                   | 0             | 0              | 0           |
| sao goncalo           | br      | Fluminense                                       | 1                 | -43.0255560  | -22.8002780 | 939101     | 0                                                           | 1                   | 0             | 0              | 1           |
| sao joao de meriti    | br      | Fluminense                                       | 1                 | -43.3608940  | -22.7986140 | 454855     | 0                                                           | 0                   | 0             | 0              | 0           |
| sao jose              | br      | Southeastern Mata Atlantica                      | 2                 | -48.6500000  | -27.6333330 | 203142     | 0                                                           | 1                   | 0             | 0              | 1           |
| sao jose do rio preto | br      | Upper Parana                                     | 3                 | -49.3833330  | -20.8000000 | 374706     | 0                                                           | 0                   | 0             | 0              | 0           |
| sao jose dos campos   | br      | Paraiba do Sul                                   | 0                 | -45.8833330  | -23.1833330 | 613776     | 0                                                           | 0                   | 0             | 0              | 0           |
| sao jose dos pinhais  | br      | Iguassu                                          | 2                 | -49.2166670  | -25.5166670 | 229988     | 0                                                           | 0                   | 0             | 0              | 0           |
| sao leopoldo          | br      | Laguna dos Patos                                 | 2                 | -51.1500000  | -29.7666670 | 209233     | 0                                                           | 0                   | 0             | 0              | 0           |
| sao luis              | br      | Amazonas Estuary & Coastal Drainages             | 0                 | -44.2666670  | -2.5166670  | 917252     | 0                                                           | 0                   | 0             | 0              | 0           |
| sao paulo             | br      | Upper Parana                                     | 3                 | -46.6658030  | -23.4732930 | 10021437   | 0                                                           | 0                   | 0             | 1              | 1           |
| sao vicente           | br      | Ribeira de Iguape                                | 1                 | -46.3833330  | -23.9666670 | 324464     | 0                                                           | 0                   | 0             | 1              | 1           |
| sapele                | ng      | Bight Drainages                                  | 7                 | 5.6766600    | 5.8940530   | 161692     | 0                                                           | 0                   | 0             | 0              | 0           |
| sapucaia              | br      | Laguna dos Patos                                 | 2                 | -51.1500000  | -29.8333330 | 130939     | 0                                                           | 0                   | 0             | 0              | 0           |
| saqqez                | ir      | Orumiyeh                                         | 0                 | 46.2665000   | 36.2463000  | 151249     | 0                                                           | 0                   | 0             | 0              | 0           |
| sarajevo              | ba      | Dniester - Lower Danube                          | 3                 | 18.3833333   | 43.8500000  | 696726     | 0                                                           | 0                   | 0             | 0              | 0           |
| saransk               | ru      | Volga - Ural                                     | 0                 | 45.1749000   | 54.1838000  | 303397     | 0                                                           | 0                   | 0             | 0              | 0           |
| sarapul               | ru      | Volga - Ural                                     | 0                 | 53.8036030   | 56.4709770  | 101346     | 0                                                           | 0                   | 0             | 0              | 0           |
| saratov               | ru      | Volga - Ural                                     | 0                 | 46.0086110   | 51.5405560  | 863734     | 0                                                           | 0                   | 0             | 0              | 0           |
| sargodha              | pk      | Lower & Middle Indus                             | 2                 | 72.6711110   | 32.0836110  | 542761     | 0                                                           | 0                   | 0             | 0              | 0           |
| sarh                  | td      | Lake Chad                                        | 0                 | 18.3833333   | 9.1500000   | 102528     | 0                                                           | 0                   | 0             | 0              | 0           |
| sari                  | ir      | Kura - South Caspian Drainages                   | 4                 | 53.0600870   | 36.5633190  | 255416     | 0                                                           | 0                   | 0             | 0              | 0           |
| sasaram               | in      | Ganges Delta & Plain                             | 13                | 84.0333330   | 24.9500000  | 145798     | 0                                                           | 0                   | 0             | 0              | 0           |
| sasebo                | jp      | Honshu - Shikoku - Kyushu                        | 5                 | 129.7227780  | 33.1591670  | 237446     | 0                                                           | 0                   | 0             | 0              | 0           |
| saskatoon             | ca      | Middle Saskatchewan                              | 1                 | -106.6666670 | 52.1333330  | 198957     | 0                                                           | 0                   | 0             | 0              | 0           |

Table S2 Cities and freshwater reptiles

| City           | Country | Freshwater Ecoregions of the World (FEOW) Region | Regional richness | Longitude    | Latitude   | Population | # of freshwater reptile species within 50 km of city centre |                     |               |                |             |
|----------------|---------|--------------------------------------------------|-------------------|--------------|------------|------------|-------------------------------------------------------------|---------------------|---------------|----------------|-------------|
|                |         |                                                  |                   |              |            |            | Lizard species                                              | Crocodilian species | Snake species | Turtle species | All species |
| sassari        | it      | Italian Peninsula & Islands                      | 6                 | 8.5602780    | 40.7272220 | 119187     | 0                                                           | 0                   | 0             | 0              | 0           |
| satara         | in      | Western Ghats                                    | 4                 | 73.9833330   | 17.6833330 | 112802     | 0                                                           | 0                   | 0             | 0              | 0           |
| satkhira       | bd      | Ganges Delta & Plain                             | 13                | 89.1000000   | 22.7166667 | 128933     | 0                                                           | 0                   | 0             | 0              | 0           |
| satna          | in      | Ganges Delta & Plain                             | 13                | 80.8333330   | 24.5833330 | 257805     | 0                                                           | 0                   | 0             | 0              | 0           |
| satu mare      | ro      | Dniester - Lower Danube                          | 3                 | 22.8833330   | 47.8000000 | 112491     | 0                                                           | 0                   | 0             | 0              | 0           |
| savannah       | us      | Appalachian Piedmont                             | 26                | -81.1000000  | 32.0833333 | 126119     | 0                                                           | 1                   | 1             | 3              | 5           |
| saveh          | ir      | Namak                                            | 3                 | 50.3566000   | 35.0213000 | 175545     | 0                                                           | 0                   | 0             | 0              | 0           |
| sawai madhopur | in      | Ganges Delta & Plain                             | 13                | 76.3666670   | 25.9833330 | 108620     | 0                                                           | 1                   | 0             | 0              | 1           |
| sawangan       | id      | Southern Sumatra - Western Java                  | 8                 | 106.5294440  | -6.2775000 | 114063     | 1                                                           | 2                   | 2             | 0              | 5           |
| sayama         | jp      | Honshu - Shikoku - Kyushu                        | 5                 | 139.3763890  | 35.8241670 | 160846     | 0                                                           | 0                   | 0             | 3              | 3           |
| scottsdale     | us      | Gila                                             | 10                | -111.8983333 | 33.5091667 | 225796     | 0                                                           | 0                   | 0             | 2              | 2           |
| seattle        | us      | Alaska & Canada Pacific Coastal                  | 4                 | -122.3308333 | 47.6063889 | 569369     | 0                                                           | 0                   | 0             | 4              | 4           |
| sekondi        | gh      | Ashanti                                          | 1                 | -1.7000000   | 4.9333333  | 104194     | 0                                                           | 0                   | 0             | 0              | 0           |
| sekudai        | my      | Malay Peninsula Eastern Slope                    | 12                | 103.6666670  | 1.5333330  | 159864     | 1                                                           | 1                   | 1             | 6              | 9           |
| selam          | in      | Southeastern Ghats                               | 3                 | 78.1666670   | 11.6500000 | 778462     | 0                                                           | 0                   | 0             | 0              | 0           |
| semarang       | id      | Central & Eastern Java                           | 4                 | 110.4203000  | -6.9932000 | 1288221    | 0                                                           | 0                   | 1             | 0              | 1           |
| semey          | kz      | Ob                                               | 0                 | 80.2275000   | 50.4111110 | 292795     | 0                                                           | 0                   | 0             | 0              | 0           |
| semnan         | ir      | Kavir & Lut Deserts                              | 0                 | 53.3971390   | 35.5729140 | 124831     | 0                                                           | 0                   | 0             | 0              | 0           |
| seoni          | in      | Northern Deccan Plateau                          | 2                 | 79.5333330   | 22.0833330 | 101389     | 0                                                           | 0                   | 0             | 0              | 0           |
| seoul          | kr      | Eastern Yellow Sea Drainages                     | 7                 | 126.9783000  | 37.5985000 | 10323448   | 0                                                           | 0                   | 0             | 2              | 2           |
| sepatan        | id      | Southern Sumatra - Western Java                  | 8                 | 106.5750000  | -6.1188890 | 118434     | 1                                                           | 2                   | 2             | 0              | 5           |
| serang         | id      | Southern Sumatra - Western Java                  | 8                 | 106.1502000  | -6.1149000 | 164777     | 0                                                           | 0                   | 0             | 0              | 0           |
| serekunda      | gm      | Senegal - Gambia                                 | 4                 | -16.6813889  | 13.4425000 | 218790     | 1                                                           | 2                   | 0             | 0              | 3           |

Table S2 Cities and freshwater reptiles

| City           | Country | Freshwater Ecoregions of the World (FEOW) Region | Regional richness | Longitude   | Latitude    | Population | # of freshwater reptile species within 50 km of city centre |                     |               |                |             |
|----------------|---------|--------------------------------------------------|-------------------|-------------|-------------|------------|-------------------------------------------------------------|---------------------|---------------|----------------|-------------|
|                |         |                                                  |                   |             |             |            | Lizard species                                              | Crocodilian species | Snake species | Turtle species | All species |
| seremban       | my      | Northern Central Sumatra - Western Malaysia      | 7                 | 101.9381000 | 2.7297000   | 372931     | 1                                                           | 0                   | 0             | 1              | 2           |
| sergiyev posad | ru      | Volga - Ural                                     | 0                 | 38.1333330  | 56.3000000  | 112921     | 0                                                           | 0                   | 0             | 0              | 0           |
| serpukhov      | ru      | Volga - Ural                                     | 0                 | 37.4111390  | 54.9157850  | 128160     | 0                                                           | 0                   | 0             | 0              | 0           |
| serra          | br      | Northeastern Mata Atlantica                      | 1                 | -40.3000000 | -20.1166670 | 394160     | 0                                                           | 0                   | 0             | 0              | 0           |
| sete lagoas    | br      | S. Francisco                                     | 0                 | -44.2333330 | -19.4500000 | 201337     | 0                                                           | 0                   | 0             | 0              | 0           |
| seto           | jp      | Honshu - Shikoku - Kyushu                        | 5                 | 137.1000000 | 35.2333330  | 134247     | 0                                                           | 0                   | 0             | 2              | 2           |
| setubal        | pt      | Western Iberia                                   | 6                 | -8.9000000  | 38.5333330  | 117109     | 0                                                           | 0                   | 0             | 3              | 3           |
| severodvinsk   | ru      | Barents Sea Drainages                            | 0                 | 39.8302000  | 64.5635000  | 194295     | 0                                                           | 0                   | 0             | 0              | 0           |
| seversk        | ru      | Ob                                               | 0                 | 84.8863890  | 56.6005560  | 109846     | 0                                                           | 0                   | 0             | 0              | 0           |
| sevilla        | es      | Southern Iberia                                  | 8                 | -5.9761330  | 37.3824080  | 686647     | 0                                                           | 0                   | 0             | 4              | 4           |
| shagamu        | ng      | Bight Drainages                                  | 7                 | 3.6477630   | 6.8432260   | 214574     | 0                                                           | 1                   | 0             | 0              | 1           |
| shah alam      | my      | Northern Central Sumatra - Western Malaysia      | 7                 | 101.5333330 | 3.0833330   | 481670     | 1                                                           | 0                   | 0             | 1              | 2           |
| shahe          | cn      | Lower Huang He                                   | 0                 | 114.4975000 | 36.8547220  | 125132     | 0                                                           | 0                   | 0             | 0              | 0           |
| shahjahanpur   | in      | Ganges Delta & Plain                             | 13                | 79.9166670  | 27.8833330  | 320466     | 0                                                           | 0                   | 0             | 0              | 0           |
| shahr-e kord   | ir      | Upper Tigris & Euphrates                         | 3                 | 50.8644440  | 32.3255560  | 129167     | 0                                                           | 0                   | 0             | 0              | 0           |
| shahreza       | ir      | Esfahan                                          | 0                 | 51.8668000  | 32.0089000  | 100806     | 0                                                           | 0                   | 0             | 0              | 0           |
| shahrud        | ir      | Kavir & Lut Deserts                              | 0                 | 54.9762820  | 36.4181890  | 131895     | 0                                                           | 0                   | 0             | 0              | 0           |
| shakhty        | ru      | Don                                              | 1                 | 40.2144340  | 47.7091060  | 221315     | 0                                                           | 0                   | 0             | 0              | 0           |
| shaki          | ng      | Bight Drainages                                  | 7                 | 3.3833330   | 8.6666670   | 178688     | 0                                                           | 0                   | 0             | 0              | 0           |
| shanghai       | cn      | Lower Yangtze                                    | 4                 | 121.3997220 | 31.0455560  | 14608512   | 0                                                           | 0                   | 0             | 1              | 1           |
| shangqiu       | cn      | Lower Yangtze                                    | 4                 | 115.6166670 | 34.3833330  | 181218     | 0                                                           | 0                   | 0             | 0              | 0           |
| shangrao       | cn      | Lower Yangtze                                    | 4                 | 117.9686040 | 28.4532210  | 318769     | 0                                                           | 0                   | 0             | 0              | 0           |
| shantipur      | in      | Ganges Delta & Plain                             | 13                | 88.4666670  | 23.2500000  | 149998     | 0                                                           | 0                   | 0             | 0              | 0           |
| shaoguan       | cn      | Xi Yang                                          | 15                | 113.5833330 | 24.8000000  | 628749     | 0                                                           | 0                   | 0             | 1              | 1           |
| shaowu         | cn      | Coastal Fujian - Zeijang                         | 1                 | 117.4830960 | 27.3408910  | 112585     | 0                                                           | 0                   | 0             | 0              | 0           |

Table S2 Cities and freshwater reptiles

| City        | Country | Freshwater Ecoregions of the World (FEOW) Region | Regional richness | Longitude   | Latitude   | Population | # of freshwater reptile species within 50 km of city centre |                     |               |                |             |
|-------------|---------|--------------------------------------------------|-------------------|-------------|------------|------------|-------------------------------------------------------------|---------------------|---------------|----------------|-------------|
|             |         |                                                  |                   |             |            |            | Lizard species                                              | Crocodilian species | Snake species | Turtle species | All species |
| shaoxing    | cn      | Lower Yangtze                                    | 4                 | 120.5715280 | 30.0110190 | 421283     | 0                                                           | 0                   | 0             | 0              | 0           |
| shaoyang    | cn      | Lower Yangtze                                    | 4                 | 111.2413760 | 26.9658930 | 649452     | 0                                                           | 0                   | 0             | 0              | 0           |
| shaping     | cn      | Xi Yang                                          | 15                | 112.8457840 | 22.4775470 | 107589     | 0                                                           | 0                   | 0             | 0              | 0           |
| sharjah     | ae      | Oman Mountains                                   | 0                 | 55.4033040  | 25.3573100 | 543942     | 0                                                           | 0                   | 0             | 0              | 0           |
| shashi      | cn      | Lower Yangtze                                    | 4                 | 112.2447220 | 30.3072220 | 498780     | 0                                                           | 0                   | 0             | 0              | 0           |
| sheffield   | gb      | Central & Western Europe                         | 13                | -1.5000000  | 53.3666670 | 447048     | 0                                                           | 0                   | 0             | 1              | 1           |
| shekhupura  | pk      | Lower & Middle Indus                             | 2                 | 73.9783330  | 31.7130560 | 361408     | 0                                                           | 0                   | 0             | 0              | 0           |
| shenyang    | cn      | Liao He                                          | 0                 | 123.4327780 | 41.7922220 | 3512192    | 0                                                           | 0                   | 0             | 0              | 0           |
| shenzhen    | cn      | Xi Yang                                          | 15                | 114.1333330 | 22.5333330 | 1002592    | 2                                                           | 0                   | 2             | 8              | 12          |
| sherbrooke  | ca      | St.Lawrence                                      | 10                | -71.9000000 | 45.4000000 | 129447     | 0                                                           | 0                   | 0             | 2              | 2           |
| sherpur     | bd      | Ganges Delta & Plain                             | 13                | 90.0166667  | 25.0166667 | 107431     | 0                                                           | 0                   | 0             | 0              | 0           |
| shihezi     | cn      | Dzungaria                                        | 0                 | 86.0333330  | 44.3000000 | 572772     | 0                                                           | 0                   | 0             | 0              | 0           |
| shikarpur   | pk      | Lower & Middle Indus                             | 2                 | 68.6378860  | 27.9570570 | 156961     | 0                                                           | 0                   | 0             | 0              | 0           |
| shiliguri   | in      | Ganges Delta & Plain                             | 13                | 88.4236110  | 26.7161110 | 515623     | 0                                                           | 0                   | 0             | 0              | 0           |
| shillong    | in      | Middle Brahmaputra                               | 0                 | 91.8730560  | 25.5755560 | 132853     | 0                                                           | 0                   | 0             | 0              | 0           |
| shilong     | cn      | Xi Yang                                          | 15                | 113.8424760 | 23.1122690 | 109733     | 0                                                           | 0                   | 0             | 0              | 0           |
| shimla      | in      | Ganges Himalayan Foothills                       | 3                 | 77.1722220  | 31.1033330 | 173517     | 0                                                           | 0                   | 0             | 0              | 0           |
| shimoga     | in      | Southern Deccan Plateau                          | 0                 | 75.5736110  | 13.9222220 | 319577     | 0                                                           | 0                   | 0             | 0              | 0           |
| shimonoseki | jp      | Honshu - Shikoku - Kyushu                        | 5                 | 130.9500000 | 33.9500000 | 245789     | 0                                                           | 0                   | 0             | 0              | 0           |
| shinyanga   | tz      | Southern Eastern Rift                            | 4                 | 33.4333333  | -3.6666667 | 107365     | 0                                                           | 0                   | 0             | 0              | 0           |
| shiraz      | ir      | Upper Tigris & Euphrates                         | 3                 | 52.5388000  | 29.6036000 | 1249972    | 0                                                           | 0                   | 0             | 0              | 0           |
| shishou     | cn      | Lower Yangtze                                    | 4                 | 112.4000000 | 29.7166670 | 122411     | 0                                                           | 0                   | 0             | 0              | 0           |
| shiyan      | cn      | Lower Yangtze                                    | 4                 | 110.7780560 | 32.6475000 | 408055     | 0                                                           | 0                   | 0             | 0              | 0           |
| shizuishan  | cn      | Huang He Great Bend                              | 0                 | 106.3958330 | 39.0419440 | 136570     | 0                                                           | 0                   | 0             | 0              | 0           |
| sholapur    | in      | Southern Deccan Plateau                          | 0                 | 75.9166670  | 17.6833330 | 997358     | 0                                                           | 0                   | 0             | 0              | 0           |

Table S2 Cities and freshwater reptiles

| City         | Country | Freshwater Ecoregions of the World (FEOW) Region | Regional richness | Longitude    | Latitude   | Population | # of freshwater reptile species within 50 km of city centre |                     |               |                |             |
|--------------|---------|--------------------------------------------------|-------------------|--------------|------------|------------|-------------------------------------------------------------|---------------------|---------------|----------------|-------------|
|              |         |                                                  |                   |              |            |            | Lizard species                                              | Crocodilian species | Snake species | Turtle species | All species |
| shreveport   | us      | Ouachita Highlands                               | 23                | -93.7500000  | 32.5250000 | 196980     | 0                                                           | 1                   | 1             | 10             | 12          |
| shrirampur   | in      | Ganges Delta & Plain                             | 13                | 88.3422220   | 22.7527780 | 226338     | 1                                                           | 0                   | 0             | 0              | 1           |
| shuangcheng  | cn      | Songhua Jiang                                    | 0                 | 126.2833330  | 45.3500000 | 130710     | 0                                                           | 0                   | 0             | 0              | 0           |
| shuangyashan | cn      | Songhua Jiang                                    | 0                 | 131.1538890  | 46.6361110 | 209521     | 0                                                           | 0                   | 0             | 0              | 0           |
| shulin       | tw      | Western Taiwan                                   | 2                 | 121.4166667  | 25.0000000 | 179136     | 0                                                           | 0                   | 0             | 2              | 2           |
| shunyi       | cn      | Lower Huang He                                   | 0                 | 116.6452780  | 40.1250000 | 117623     | 0                                                           | 0                   | 0             | 0              | 0           |
| shymkent     | kz      | Northern Central Asian Highlands                 | 1                 | 69.6000000   | 42.3000000 | 414059     | 0                                                           | 0                   | 0             | 0              | 0           |
| si racha     | th      | Chao Phraya                                      | 12                | 100.9311110  | 13.1737220 | 178916     | 0                                                           | 0                   | 0             | 0              | 0           |
| sialkot      | pk      | Lower & Middle Indus                             | 2                 | 74.5431300   | 32.5101030 | 477537     | 0                                                           | 0                   | 0             | 0              | 0           |
| siauliai     | lt      | Southern Baltic Lowlands                         | 0                 | 23.3166667   | 55.9333333 | 130594     | 0                                                           | 0                   | 0             | 0              | 0           |
| sibiu        | ro      | Dniester - Lower Danube                          | 3                 | 24.1500000   | 45.8000000 | 151895     | 0                                                           | 0                   | 0             | 0              | 0           |
| sibu         | my      | Northwestern Borneo                              | 9                 | 111.8166670  | 2.3000000  | 198252     | 0                                                           | 0                   | 0             | 0              | 0           |
| sidoarjo     | id      | Central & Eastern Java                           | 4                 | 112.7183000  | -7.4478000 | 139205     | 0                                                           | 0                   | 0             | 0              | 0           |
| siegen       | de      | Central & Western Europe                         | 13                | 8.0333330    | 50.8666670 | 108228     | 0                                                           | 0                   | 0             | 0              | 0           |
| siirt        | tr      | Upper Tigris & Euphrates                         | 3                 | 41.9402470   | 37.9326240 | 114094     | 0                                                           | 0                   | 0             | 0              | 0           |
| sikar        | in      | Lower & Middle Indus                             | 2                 | 75.1500000   | 27.6166670 | 199946     | 0                                                           | 0                   | 0             | 0              | 0           |
| sikasso      | ml      | Upper Niger                                      | 0                 | -5.6666667   | 11.3166667 | 144801     | 0                                                           | 0                   | 0             | 0              | 0           |
| silchar      | in      | Ganges Delta & Plain                             | 13                | 92.8000000   | 24.8166670 | 152399     | 0                                                           | 0                   | 0             | 0              | 0           |
| simi valley  | us      | Southern California Coastal - Baja California    | 12                | -118.7805556 | 34.2694444 | 119417     | 0                                                           | 0                   | 0             | 5              | 5           |
| sincelejo    | co      | Magdalena - Sinu                                 | 15                | -75.3977780  | 9.3047220  | 261190     | 1                                                           | 1                   | 0             | 2              | 4           |
| singapore    | sg      | Malay Peninsula Eastern Slope                    | 12                | 103.8558333  | 1.2930556  | 3547809    | 1                                                           | 1                   | 1             | 6              | 9           |
| singaraja    | id      | Lesser Sunda Islands                             | 3                 | 115.0949000  | -8.1127000 | 133796     | 1                                                           | 0                   | 1             | 0              | 2           |
| singawang    | id      | Kapuas                                           | 2                 | 109.0000000  | 0.9000000  | 101851     | 0                                                           | 0                   | 0             | 0              | 0           |
| sinnar       | sd      | Lower Nile                                       | 1                 | 33.6333333   | 13.5500000 | 130138     | 0                                                           | 0                   | 0             | 0              | 0           |
| sioux falls  | us      | Middle Missouri                                  | 12                | -96.7000000  | 43.5500000 | 140336     | 0                                                           | 0                   | 0             | 0              | 0           |

Table S2 Cities and freshwater reptiles

| City          | Country | Freshwater Ecoregions of the World (FEOW) Region | Regional richness | Longitude   | Latitude    | Population | # of freshwater reptile species within 50 km of city centre |                     |               |                |             |
|---------------|---------|--------------------------------------------------|-------------------|-------------|-------------|------------|-------------------------------------------------------------|---------------------|---------------|----------------|-------------|
|               |         |                                                  |                   |             |             |            | Lizard species                                              | Crocodilian species | Snake species | Turtle species | All species |
| sirajganj     | bd      | Ganges Delta & Plain                             | 13                | 89.7166667  | 24.4500000  | 167501     | 0                                                           | 0                   | 0             | 0              | 0           |
| sirjan        | ir      | Kavir & Lut Deserts                              | 0                 | 55.6814000  | 29.4520000  | 207661     | 0                                                           | 0                   | 0             | 0              | 0           |
| sirsa         | in      | Lower & Middle Indus                             | 2                 | 75.0166670  | 29.5333330  | 181652     | 0                                                           | 0                   | 0             | 0              | 0           |
| sitapur       | in      | Ganges Delta & Plain                             | 13                | 80.6833330  | 27.5666670  | 164451     | 0                                                           | 0                   | 0             | 0              | 0           |
| sivas         | tr      | Northern Anatolia                                | 2                 | 37.0161110  | 39.7483330  | 264163     | 0                                                           | 0                   | 0             | 0              | 0           |
| siverek       | tr      | Upper Tigris & Euphrates                         | 3                 | 39.3166670  | 37.7550250  | 175432     | 0                                                           | 0                   | 0             | 0              | 0           |
| siwan         | in      | Ganges Delta & Plain                             | 13                | 84.3666670  | 26.2166670  | 119194     | 0                                                           | 0                   | 0             | 0              | 0           |
| skopje        | mk      | Vardar                                           | 0                 | 21.4333333  | 42.0000000  | 474887     | 0                                                           | 0                   | 0             | 0              | 0           |
| slough        | gb      | Central & Western Europe                         | 13                | -0.5833330  | 51.5000000  | 134072     | 0                                                           | 0                   | 0             | 2              | 2           |
| smolensk      | ru      | Dnieper - South Bug                              | 2                 | 32.0401000  | 54.7818000  | 320994     | 0                                                           | 0                   | 0             | 0              | 0           |
| soacha        | co      | Magdalena - Sinu                                 | 15                | -74.2168190 | 4.5793680   | 313950     | 0                                                           | 0                   | 0             | 3              | 3           |
| sobral        | br      | Northeastern Caatinga & Coastal Drainages        | 1                 | -40.3500000 | -3.7000000  | 157998     | 0                                                           | 0                   | 0             | 0              | 0           |
| soc trang     | vn      | Mekong Delta                                     | 3                 | 105.9800000 | 9.6033330   | 114462     | 0                                                           | 0                   | 0             | 0              | 0           |
| sochi         | ru      | Western Transcaucasia                            | 0                 | 39.7256890  | 43.5991670  | 327613     | 0                                                           | 0                   | 0             | 0              | 0           |
| sofia         | bg      | Dniester - Lower Danube                          | 3                 | 23.3166667  | 42.6833333  | 1062065    | 0                                                           | 0                   | 0             | 1              | 1           |
| sogamoso      | co      | Magdalena - Sinu                                 | 15                | -72.9339080 | 5.7143440   | 126553     | 0                                                           | 0                   | 0             | 0              | 0           |
| sohag         | eg      | Lower Nile                                       | 1                 | 31.7000000  | 26.5500000  | 209440     | 0                                                           | 0                   | 0             | 0              | 0           |
| soka          | jp      | Honshu - Shikoku - Kyushu                        | 5                 | 139.8044440 | 35.8202780  | 231449     | 0                                                           | 0                   | 0             | 3              | 3           |
| sokode        | tg      | Bight Drainages                                  | 7                 | 1.1333333   | 8.9833333   | 108373     | 0                                                           | 0                   | 0             | 0              | 0           |
| sokoto        | ng      | Lower Niger - Benue                              | 2                 | 5.2142850   | 13.0480250  | 563899     | 0                                                           | 0                   | 0             | 0              | 0           |
| soledad       | co      | Magdalena - Sinu                                 | 15                | -74.7645900 | 10.9184330  | 342562     | 0                                                           | 0                   | 0             | 2              | 2           |
| solikamsk     | ru      | Volga - Ural                                     | 0                 | 56.7728890  | 59.6195570  | 100814     | 0                                                           | 0                   | 0             | 0              | 0           |
| solingen      | de      | Central & Western Europe                         | 13                | 7.0833330   | 51.1833330  | 165192     | 0                                                           | 0                   | 0             | 3              | 3           |
| somerset west | za      | Cape Fold                                        | 3                 | 18.8569900  | -34.0793750 | 183503     | 0                                                           | 0                   | 1             | 1              | 2           |
| songea        | tz      | Coastal East Africa                              | 4                 | 35.6500000  | -10.6833333 | 126499     | 0                                                           | 0                   | 0             | 0              | 0           |

Table S2 Cities and freshwater reptiles

| City            | Country | Freshwater Ecoregions of the World (FEOW) Region   | Regional richness | Longitude   | Latitude    | Population | # of freshwater reptile species within 50 km of city centre |                     |               |                |             |
|-----------------|---------|----------------------------------------------------|-------------------|-------------|-------------|------------|-------------------------------------------------------------|---------------------|---------------|----------------|-------------|
|                 |         |                                                    |                   |             |             |            | Lizard species                                              | Crocodilian species | Snake species | Turtle species | All species |
| sonipat         | in      | Ganges Delta & Plain                               | 13                | 77.0166670  | 28.9833330  | 250538     | 0                                                           | 0                   | 0             | 0              | 0           |
| soreang         | id      | Southern Sumatra - Western Java                    | 8                 | 107.5183330 | -7.0330560  | 151135     | 0                                                           | 0                   | 0             | 0              | 0           |
| sorocaba        | br      | Upper Parana                                       | 3                 | -47.4500000 | -23.4833330 | 558874     | 0                                                           | 1                   | 0             | 1              | 2           |
| sorong          | id      | Vogelkop-Bomberai                                  | #N/A              | 131.2500000 | -0.8833330  | 125538     | 1                                                           | 0                   | 0             | 0              | 1           |
| sosnowiec       | pl      | Central & Western Europe                           | 13                | 19.1550390  | 50.2722430  | 227295     | 0                                                           | 0                   | 0             | 1              | 1           |
| soubre          | ci      | Eburneo                                            | 0                 | -6.5938800  | 5.7837660   | 123214     | 0                                                           | 0                   | 0             | 0              | 0           |
| south bend      | us      | Laurentian Great Lakes                             | 16                | -86.2500000 | 41.6833333  | 103760     | 0                                                           | 0                   | 0             | 4              | 4           |
| southampton     | gb      | Central & Western Europe                           | 13                | -1.4000000  | 50.9000000  | 246201     | 0                                                           | 0                   | 0             | 1              | 1           |
| southend-on-sea | gb      | Central & Western Europe                           | 13                | 0.7000000   | 51.5333330  | 163378     | 0                                                           | 0                   | 0             | 1              | 1           |
| soweto          | za      | Southern Temperate Highveld                        | 5                 | 27.8584920  | -26.2678120 | 1695094    | 0                                                           | 1                   | 1             | 1              | 3           |
| soyapango       | sv      | Chiapas - Fonseca                                  | 11                | -89.1513889 | 13.7347222  | 329704     | 1                                                           | 0                   | 0             | 1              | 2           |
| spanish town    | jm      | Jamaica                                            | 2                 | -76.9500000 | 17.9833333  | 145024     | 0                                                           | 0                   | 0             | 0              | 0           |
| split           | hr      | Dalmatia                                           | 2                 | 16.4558333  | 43.5138889  | 176315     | 0                                                           | 0                   | 0             | 0              | 0           |
| spokane         | us      | Columbia Glaciated                                 | 2                 | -           | 47.6588889  | 197262     | 0                                                           | 0                   | 0             | 1              | 1           |
| spring valley   | us      | Vegas - Virgin                                     | 2                 | -           | 36.1080556  | 165015     | 0                                                           | 0                   | 0             | 3              | 3           |
| springfield     | us      | Northeast US & Southeast Canada Atlantic Drainages | 18                | -72.5902778 | 42.1013889  | 152227     | 0                                                           | 0                   | 0             | 5              | 5           |
| springfield     | us      | Ozark Highlands                                    | 24                | -93.2980556 | 37.2152778  | 150443     | 0                                                           | 0                   | 0             | 5              | 5           |
| springfield     | us      | Upper Mississippi                                  | 20                | -89.6436111 | 39.8016667  | 115975     | 0                                                           | 0                   | 0             | 5              | 5           |
| springs         | za      | Southern Temperate Highveld                        | 5                 | 28.4000000  | -26.2500000 | 186400     | 0                                                           | 1                   | 1             | 1              | 3           |
| srikakulam      | in      | Northern Deccan Plateau                            | 2                 | 83.9000000  | 18.3000000  | 118312     | 0                                                           | 0                   | 0             | 0              | 0           |
| srinagar        | in      | Indus Himalayan Foothills                          | 0                 | 74.8022220  | 34.0922220  | 975926     | 0                                                           | 0                   | 0             | 0              | 0           |
| stamford        | us      | Northeast US & Southeast Canada Atlantic Drainages | 18                | -73.5391667 | 41.0533333  | 121230     | 0                                                           | 0                   | 0             | 8              | 8           |
| stara zagora    | bg      | Thrace                                             | 3                 | 25.6419444  | 42.4327778  | 137760     | 0                                                           | 0                   | 0             | 0              | 0           |
| staryy oskol    | ru      | Don                                                | 1                 | 37.8416670  | 51.2966670  | 226980     | 0                                                           | 0                   | 0             | 0              | 0           |

Table S2 Cities and freshwater reptiles

| City             | Country | Freshwater Ecoregions of the World (FEOW) Region | Regional richness | Longitude    | Latitude    | Population | # of freshwater reptile species within 50 km of city centre |                     |               |                |             |
|------------------|---------|--------------------------------------------------|-------------------|--------------|-------------|------------|-------------------------------------------------------------|---------------------|---------------|----------------|-------------|
|                  |         |                                                  |                   |              |             |            | Lizard species                                              | Crocodilian species | Snake species | Turtle species | All species |
| stavanger        | no      | Norwegian Sea Drainages                          | 0                 | 5.7500000    | 58.9666670  | 173535     | 0                                                           | 0                   | 0             | 0              | 0           |
| stavropol        | ru      | Don                                              | 1                 | 41.9734000   | 45.0428000  | 363069     | 0                                                           | 0                   | 0             | 0              | 0           |
| sterling heights | us      | Laurentian Great Lakes                           | 16                | -83.0302778  | 42.5802778  | 126657     | 0                                                           | 0                   | 0             | 6              | 6           |
| sterlitamak      | ru      | Volga - Ural                                     | 0                 | 55.9501480   | 53.6246190  | 267235     | 0                                                           | 0                   | 0             | 0              | 0           |
| stockholm        | se      | Northern Baltic Drainages                        | 2                 | 18.0500000   | 59.3333330  | 1253309    | 0                                                           | 0                   | 0             | 1              | 1           |
| stockport        | gb      | Central & Western Europe                         | 13                | -2.1500000   | 53.4000000  | 139053     | 0                                                           | 0                   | 0             | 1              | 1           |
| stockton         | us      | Sacramento - San Joaquin                         | 10                | -121.2897222 | 37.9577778  | 289580     | 0                                                           | 0                   | 0             | 2              | 2           |
| stoke-on-trent   | gb      | Central & Western Europe                         | 13                | -2.1833330   | 53.0000000  | 260420     | 0                                                           | 0                   | 0             | 1              | 1           |
| strasbourg       | fr      | Central & Western Europe                         | 13                | 7.7873550    | 48.6003810  | 273506     | 0                                                           | 0                   | 0             | 2              | 2           |
| stuttgart        | de      | Central & Western Europe                         | 13                | 9.1833330    | 48.7666670  | 591688     | 0                                                           | 0                   | 0             | 4              | 4           |
| subang           | id      | Southern Sumatra - Western Java                  | 8                 | 107.7566670  | -6.5700000  | 129009     | 0                                                           | 0                   | 0             | 0              | 0           |
| suceava          | ro      | Dniester - Lower Danube                          | 3                 | 26.2500000   | 47.6333330  | 105797     | 0                                                           | 0                   | 0             | 0              | 0           |
| sucre            | bo      | Chaco                                            | 3                 | -65.2591667  | -19.0430556 | 224846     | 0                                                           | 0                   | 0             | 0              | 0           |
| sudbury          | ca      | Laurentian Great Lakes                           | 16                | -80.9666670  | 46.5000000  | 109724     | 0                                                           | 0                   | 0             | 2              | 2           |
| suez             | eg      | Nile Delta                                       | 0                 | 32.5500000   | 29.9666667  | 488124     | 0                                                           | 0                   | 0             | 0              | 0           |
| suihua           | cn      | Songhua Jiang                                    | 0                 | 126.9969440  | 46.6405560  | 252245     | 0                                                           | 0                   | 0             | 0              | 0           |
| suining          | cn      | Middle Yangtze                                   | 1                 | 105.5733240  | 30.5080170  | 124924     | 0                                                           | 0                   | 0             | 0              | 0           |
| suita            | jp      | Honshu - Shikoku - Kyushu                        | 5                 | 135.5333330  | 34.7500000  | 351634     | 0                                                           | 0                   | 0             | 2              | 2           |
| sujiatun         | cn      | Liao He                                          | 0                 | 123.3391670  | 41.6591670  | 148113     | 0                                                           | 0                   | 0             | 0              | 0           |
| sukabumi         | id      | Indian Ocean Slope of Sumatra & Java             | 9                 | 106.9266670  | -6.9180560  | 276431     | 1                                                           | 0                   | 0             | 0              | 1           |
| sukaraja         | id      | Southern Sumatra - Western Java                  | 8                 | 106.8375000  | -6.5877780  | 157205     | 1                                                           | 0                   | 2             | 0              | 3           |
| sukkur           | pk      | Lower & Middle Indus                             | 2                 | 68.8573830   | 27.7051640  | 417923     | 0                                                           | 0                   | 0             | 0              | 0           |
| suleja           | ng      | Lower Niger - Benue                              | 2                 | 7.1793270    | 9.1805150   | 162150     | 0                                                           | 0                   | 0             | 0              | 0           |
| sullana          | pe      | North Andean Pacific Slopes - Rio Atrato         | 14                | -80.6852778  | -4.9038889  | 162493     | 0                                                           | 0                   | 0             | 0              | 0           |

Table S2 Cities and freshwater reptiles

| City             | Country | Freshwater Ecoregions of the World (FEOW) Region | Regional richness | Longitude    | Latitude    | Population | # of freshwater reptile species within 50 km of city centre |                     |               |                |             |
|------------------|---------|--------------------------------------------------|-------------------|--------------|-------------|------------|-------------------------------------------------------------|---------------------|---------------|----------------|-------------|
|                  |         |                                                  |                   |              |             |            | Lizard species                                              | Crocodilian species | Snake species | Turtle species | All species |
| sultanpur        | in      | Ganges Delta & Plain                             | 13                | 82.0666670   | 26.2666670  | 110379     | 0                                                           | 0                   | 0             | 0              | 0           |
| sumare           | br      | Upper Parana                                     | 3                 | -47.2833330  | -22.8000000 | 227982     | 0                                                           | 0                   | 0             | 1              | 1           |
| sumedang         | id      | Southern Sumatra - Western Java                  | 8                 | 107.9163890  | -6.8586110  | 206919     | 0                                                           | 0                   | 0             | 0              | 0           |
| sumy             | ua      | Dnieper - South Bug                              | 2                 | 34.8002940   | 50.9215970  | 294454     | 0                                                           | 0                   | 0             | 0              | 0           |
| sunderland       | gb      | Central & Western Europe                         | 13                | -1.3833330   | 54.9119440  | 177965     | 0                                                           | 0                   | 0             | 0              | 0           |
| sungai petani    | my      | Northern Central Sumatra - Western Malaysia      | 7                 | 100.4877240  | 5.6469970   | 228898     | 1                                                           | 0                   | 0             | 2              | 3           |
| sunggal          | id      | Northern Central Sumatra - Western Malaysia      | 7                 | 98.6151000   | 3.5765000   | 157936     | 0                                                           | 0                   | 0             | 1              | 1           |
| sunnyvale        | us      | Sacramento - San Joaquin                         | 10                | -122.0352778 | 37.3688889  | 126499     | 0                                                           | 0                   | 0             | 5              | 5           |
| sunrise manor    | us      | Vegas - Virgin                                   | 2                 | -115.0722222 | 36.2111111  | 188608     | 0                                                           | 0                   | 0             | 3              | 3           |
| sur              | lb      | Coastal Levant                                   | 1                 | 35.1963889   | 33.2711111  | 135211     | 0                                                           | 0                   | 0             | 1              | 1           |
| surabaya         | id      | Central & Eastern Java                           | 4                 | 112.7508330  | -7.2491670  | 2374920    | 0                                                           | 0                   | 0             | 0              | 0           |
| surakarta        | id      | Central & Eastern Java                           | 4                 | 110.8316670  | -7.5561110  | 555368     | 0                                                           | 0                   | 0             | 0              | 0           |
| surat            | in      | Namuda - Tapi                                    | 1                 | 72.9000000   | 20.9666670  | 2894675    | 0                                                           | 0                   | 0             | 0              | 0           |
| surat thani      | th      | Malay Peninsula Eastern Slope                    | 12                | 99.3331140   | 9.1401090   | 127201     | 0                                                           | 0                   | 0             | 0              | 0           |
| surendranagar    | in      | Namuda - Tapi                                    | 1                 | 71.6833330   | 22.7000000  | 179640     | 0                                                           | 0                   | 0             | 0              | 0           |
| surgut           | ru      | Ob                                               | 0                 | 73.4166670   | 61.2500000  | 300371     | 0                                                           | 0                   | 0             | 0              | 0           |
| suriapet         | in      | Southern Deccan Plateau                          | 0                 | 79.6166670   | 17.1500000  | 111741     | 0                                                           | 0                   | 0             | 0              | 0           |
| surt             | ly      | Sahara                                           | 1                 | 16.5947222   | 31.2061111  | 128123     | 0                                                           | 0                   | 0             | 0              | 0           |
| susah            | tn      | Mediterranean Northwest Africa                   | 2                 | 10.6369910   | 35.8253880  | 163704     | 0                                                           | 0                   | 0             | 0              | 0           |
| sutton coldfield | gb      | Central & Western Europe                         | 13                | -1.8166670   | 52.5666670  | 107030     | 0                                                           | 0                   | 0             | 1              | 1           |
| suzano           | br      | Upper Parana                                     | 3                 | -46.3333330  | -23.5333330 | 283319     | 0                                                           | 0                   | 0             | 1              | 1           |
| suzhou           | cn      | Lower Yangtze                                    | 4                 | 120.6180560  | 31.3113890  | 1343091    | 0                                                           | 0                   | 0             | 0              | 0           |
| suzhou           | cn      | Lower Yangtze                                    | 4                 | 116.9788890  | 33.6361110  | 205130     | 0                                                           | 0                   | 0             | 0              | 0           |
| suzuka           | jp      | Honshu - Shikoku - Kyushu                        | 5                 | 136.5833330  | 34.8833330  | 191479     | 0                                                           | 0                   | 0             | 0              | 0           |

Table S2 Cities and freshwater reptiles

| City            | Country | Freshwater Ecoregions of the World (FEOW) Region | Regional richness | Longitude    | Latitude    | Population | # of freshwater reptile species within 50 km of city centre |                     |               |                |             |
|-----------------|---------|--------------------------------------------------|-------------------|--------------|-------------|------------|-------------------------------------------------------------|---------------------|---------------|----------------|-------------|
|                 |         |                                                  |                   |              |             |            | Lizard species                                              | Crocodilian species | Snake species | Turtle species | All species |
| swansea         | gb      | Northern British Isles                           | 1                 | -3.9666670   | 51.6333330  | 170885     | 0                                                           | 0                   | 0             | 1              | 1           |
| swindon         | gb      | Central & Western Europe                         | 13                | -1.7833330   | 51.5166670  | 162439     | 0                                                           | 0                   | 0             | 0              | 0           |
| sydney          | au      | Eastern Coastal Australia                        | 19                | 151.2054750  | -33.8614810 | 4394585    | 3                                                           | 0                   | 3             | 5              | 11          |
| syktyvkar       | ru      | Barents Sea Drainages                            | 0                 | 50.8099410   | 61.6764220  | 230142     | 0                                                           | 0                   | 0             | 0              | 0           |
| syracuse        | it      | Italian Peninsula & Islands                      | 6                 | 15.3000000   | 37.0666670  | 127666     | 0                                                           | 0                   | 0             | 5              | 5           |
| syracuse        | us      | Laurentian Great Lakes                           | 16                | -76.1477778  | 43.0480556  | 141830     | 0                                                           | 0                   | 0             | 5              | 5           |
| syzran          | ru      | Volga - Ural                                     | 0                 | 48.4681000   | 53.1585000  | 189341     | 0                                                           | 0                   | 0             | 0              | 0           |
| szczecin        | pl      | Central & Western Europe                         | 13                | 14.5938910   | 53.4395310  | 413658     | 0                                                           | 0                   | 0             | 1              | 1           |
| szeged          | hu      | Dniester - Lower Danube                          | 3                 | 20.1666670   | 46.2500000  | 160609     | 0                                                           | 0                   | 0             | 0              | 0           |
| szekesfehervar  | hu      | Upper Danube                                     | 5                 | 18.4096000   | 47.1955030  | 103772     | 0                                                           | 0                   | 0             | 0              | 0           |
| taboao da serra | br      | Upper Parana                                     | 3                 | -46.7666670  | -23.6000000 | 214527     | 0                                                           | 0                   | 0             | 1              | 1           |
| tabora          | tz      | Malagarasi - Moyowosi                            | 0                 | 32.8000000   | -5.0166667  | 145291     | 0                                                           | 0                   | 0             | 0              | 0           |
| tabriz          | ir      | Orumiyeh                                         | 0                 | 46.2919000   | 38.0800000  | 1424701    | 0                                                           | 0                   | 0             | 0              | 0           |
| tabuk           | sa      | Arabian Interior                                 | 1                 | 36.5715050   | 28.3998040  | 355469     | 0                                                           | 0                   | 0             | 0              | 0           |
| tachikawa       | jp      | Honshu - Shikoku - Kyushu                        | 5                 | 139.4180560  | 35.6927780  | 173696     | 0                                                           | 0                   | 0             | 3              | 3           |
| tacloban        | ph      | Northern Philippine Islands                      | 1                 | 125.0047220  | 11.2433330  | 189087     | 0                                                           | 0                   | 0             | 0              | 0           |
| tacna           | pe      | Atacama                                          | 0                 | -70.2483333  | -18.0055556 | 280996     | 0                                                           | 0                   | 0             | 0              | 0           |
| tacoma          | us      | Alaska & Canada Pacific Coastal                  | 4                 | -122.4430556 | 47.2530556  | 196957     | 0                                                           | 0                   | 0             | 3              | 3           |
| tadepallegudem  | in      | Southern Deccan Plateau                          | 0                 | 81.5000000   | 16.8333330  | 108176     | 0                                                           | 0                   | 0             | 0              | 0           |
| taganrog        | ru      | Don                                              | 1                 | 38.8968780   | 47.2361700  | 279060     | 0                                                           | 0                   | 0             | 0              | 0           |
| tagum           | ph      | Mindanao                                         | 1                 | 125.8046000  | 7.4475000   | 171656     | 0                                                           | 0                   | 0             | 0              | 0           |
| taian           | cn      | Lower Huang He                                   | 0                 | 117.1200000  | 36.1852780  | 750340     | 0                                                           | 0                   | 0             | 0              | 0           |
| taicheng        | cn      | Xi Yang                                          | 15                | 112.7799040  | 22.2513470  | 145440     | 0                                                           | 0                   | 0             | 0              | 0           |
| taichung        | tw      | Western Taiwan                                   | 2                 | 120.6813889  | 24.1433333  | 1083582    | 0                                                           | 0                   | 0             | 3              | 3           |
| tainan          | tw      | Western Taiwan                                   | 2                 | 120.2036111  | 22.9933333  | 734314     | 0                                                           | 0                   | 0             | 1              | 1           |

Table S2 Cities and freshwater reptiles

| City        | Country | Freshwater Ecoregions of the World (FEOW) Region | Regional richness | Longitude   | Latitude    | Population | # of freshwater reptile species within 50 km of city centre |                     |               |                |             |
|-------------|---------|--------------------------------------------------|-------------------|-------------|-------------|------------|-------------------------------------------------------------|---------------------|---------------|----------------|-------------|
|             |         |                                                  |                   |             |             |            | Lizard species                                              | Crocodilian species | Snake species | Turtle species | All species |
| taipei      | tw      | Western Taiwan                                   | 2                 | 121.5250000 | 25.0391667  | 2514794    | 0                                                           | 0                   | 0             | 2              | 2           |
| taiping     | my      | Northern Central Sumatra - Western Malaysia      | 7                 | 100.7333330 | 4.8500000   | 217658     | 1                                                           | 0                   | 0             | 0              | 1           |
| taitung     | tw      | Eastern Taiwan                                   | 0                 | 121.1500000 | 22.7500000  | 109353     | 0                                                           | 0                   | 0             | 0              | 0           |
| taiyuan     | cn      | Lower Huang He                                   | 0                 | 112.4708330 | 37.7269440  | 2722475    | 0                                                           | 0                   | 0             | 0              | 0           |
| taizhou     | cn      | Lower Yangtze                                    | 4                 | 119.9106270 | 32.4933330  | 612356     | 0                                                           | 0                   | 0             | 0              | 0           |
| tajimi      | jp      | Honshu - Shikoku - Kyushu                        | 5                 | 137.1333330 | 35.3166670  | 107819     | 0                                                           | 0                   | 0             | 2              | 2           |
| takaoka     | jp      | Honshu - Shikoku - Kyushu                        | 5                 | 137.0166670 | 36.7500000  | 170079     | 0                                                           | 0                   | 0             | 0              | 0           |
| takarazuka  | jp      | Honshu - Shikoku - Kyushu                        | 5                 | 135.3500000 | 34.8000000  | 219790     | 0                                                           | 0                   | 0             | 2              | 2           |
| takasaki    | jp      | Honshu - Shikoku - Kyushu                        | 5                 | 139.0166670 | 36.3333330  | 240860     | 0                                                           | 0                   | 0             | 0              | 0           |
| takatsuki   | jp      | Honshu - Shikoku - Kyushu                        | 5                 | 135.6166670 | 34.8500000  | 354472     | 0                                                           | 0                   | 0             | 2              | 2           |
| takoradi    | gh      | Ashanti                                          | 1                 | -1.7500000  | 4.8833333   | 114989     | 0                                                           | 0                   | 0             | 0              | 0           |
| talara      | pe      | North Andean Pacific Slopes - Rio Atrato         | 14                | -81.2719444 | -4.5772222  | 100105     | 0                                                           | 0                   | 0             | 0              | 0           |
| talca       | cl      | South Andean Pacific Slopes                      | 0                 | -71.6666670 | -35.4333330 | 197480     | 0                                                           | 0                   | 0             | 0              | 0           |
| talcahuano  | cl      | South Andean Pacific Slopes                      | 0                 | -73.1166670 | -36.7166670 | 252969     | 0                                                           | 0                   | 0             | 0              | 0           |
| tali        | tw      | Western Taiwan                                   | 2                 | 120.6666667 | 24.1000000  | 190564     | 0                                                           | 0                   | 0             | 3              | 3           |
| talisay     | ph      | Northern Philippine Islands                      | 1                 | 123.8473000 | 10.2443790  | 133189     | 0                                                           | 0                   | 0             | 0              | 0           |
| talkha      | eg      | Nile Delta                                       | 0                 | 31.3738889  | 31.0530556  | 157756     | 0                                                           | 0                   | 0             | 0              | 0           |
| tallahassee | us      | Florida Peninsula                                | 30                | -84.2808333 | 30.4380556  | 153583     | 0                                                           | 1                   | 1             | 10             | 12          |
| tallinn     | ee      | Southern Baltic Lowlands                         | 0                 | 24.7280556  | 59.4338889  | 394023     | 0                                                           | 0                   | 0             | 0              | 0           |
| tama        | jp      | Honshu - Shikoku - Kyushu                        | 5                 | 139.4684360 | 35.6435990  | 147477     | 0                                                           | 0                   | 0             | 3              | 3           |
| tamale      | gh      | Volta                                            | 7                 | -0.8333333  | 9.4000000   | 360644     | 0                                                           | 0                   | 0             | 0              | 0           |
| taman       | id      | Central & Eastern Java                           | 4                 | 112.8978000 | -7.1785000  | 126875     | 0                                                           | 0                   | 0             | 0              | 0           |
| taman       | id      | Central & Eastern Java                           | 4                 | 109.3833330 | -6.9000000  | 181626     | 0                                                           | 0                   | 0             | 0              | 0           |
| tambaram    | in      | Southeastern Ghats                               | 3                 | 80.1105560  | 12.9272220  | 150056     | 0                                                           | 2                   | 0             | 0              | 2           |
| tambov      | ru      | Volga - Ural                                     | 0                 | 41.4432620  | 52.7316890  | 290936     | 0                                                           | 0                   | 0             | 0              | 0           |

Table S2 Cities and freshwater reptiles

| City           | Country | Freshwater Ecoregions of the World (FEOW) Region | Regional richness | Longitude   | Latitude    | Population | # of freshwater reptile species within 50 km of city centre |                     |               |                |             |
|----------------|---------|--------------------------------------------------|-------------------|-------------|-------------|------------|-------------------------------------------------------------|---------------------|---------------|----------------|-------------|
|                |         |                                                  |                   |             |             |            | Lizard species                                              | Crocodilian species | Snake species | Turtle species | All species |
| tambun         | id      | Southern Sumatra - Western Java                  | 8                 | 107.2222220 | -6.1052780  | 314271     | 1                                                           | 2                   | 2             | 0              | 5           |
| tampa          | us      | Florida Peninsula                                | 30                | -82.4586111 | 27.9472222  | 324465     | 0                                                           | 1                   | 1             | 7              | 9           |
| tampere        | fi      | Northern Baltic Drainages                        | 2                 | 23.7500000  | 61.5000000  | 202688     | 0                                                           | 0                   | 0             | 0              | 0           |
| tampico        | mx      | Panuco                                           | 12                | -97.8500000 | 22.3000000  | 309015     | 0                                                           | 1                   | 0             | 2              | 3           |
| tampico        | mx      | Panuco                                           | 12                | -97.8500000 | 22.2166670  | 309015     | 0                                                           | 1                   | 0             | 2              | 3           |
| tandil         | ar      | Bonaerensean Drainages                           | 1                 | -59.1331640 | -37.3216740 | 100127     | 0                                                           | 0                   | 0             | 0              | 0           |
| tando adam     | pk      | Lower & Middle Indus                             | 2                 | 68.6609820  | 25.7637360  | 125646     | 0                                                           | 0                   | 0             | 0              | 0           |
| tanete         | id      | Sulawesi                                         | 2                 | 120.1371000 | -5.3306000  | 105109     | 0                                                           | 0                   | 0             | 0              | 0           |
| tanga          | tz      | Pangani                                          | 1                 | 39.1000000  | -5.0666667  | 224891     | 1                                                           | 1                   | 0             | 0              | 2           |
| tangerang      | id      | Southern Sumatra - Western Java                  | 8                 | 106.6300000 | -6.1780560  | 1372185    | 1                                                           | 2                   | 2             | 0              | 5           |
| tanggu         | cn      | Lower Huang He                                   | 0                 | 117.6469440 | 39.0211110  | 535298     | 0                                                           | 0                   | 0             | 0              | 0           |
| tangier        | ma      | Atlantic Northwest Africa                        | 3                 | -5.8136460  | 35.7805760  | 825316     | 0                                                           | 0                   | 0             | 3              | 3           |
| tangshan       | cn      | Lower Huang He                                   | 0                 | 114.7013890 | 37.3325000  | 2054526    | 0                                                           | 0                   | 0             | 0              | 0           |
| tanjung morawa | id      | Northern Central Sumatra - Western Malaysia      | 7                 | 98.7914000  | 3.5193000   | 157908     | 0                                                           | 0                   | 0             | 1              | 1           |
| tanshui        | tw      | Western Taiwan                                   | 2                 | 121.4433333 | 25.1777778  | 133001     | 0                                                           | 0                   | 0             | 2              | 2           |
| tanta          | eg      | Nile Delta                                       | 0                 | 30.9980556  | 30.7911111  | 404934     | 0                                                           | 0                   | 0             | 0              | 0           |
| tanza          | ph      | Northern Philippine Islands                      | 1                 | 120.9389000 | 14.6753000  | 105537     | 0                                                           | 0                   | 0             | 0              | 0           |
| taonan         | cn      | Songhua Jiang                                    | 0                 | 122.7833330 | 45.3333330  | 112819     | 0                                                           | 0                   | 0             | 0              | 0           |
| taoyuan        | tw      | Western Taiwan                                   | 2                 | 121.3055556 | 24.9869444  | 375366     | 0                                                           | 0                   | 0             | 2              | 2           |
| tapachula      | mx      | Chiapas - Fonseca                                | 11                | -92.2833330 | 14.9000000  | 197968     | 1                                                           | 3                   | 0             | 4              | 8           |
| taranto        | it      | Italian Peninsula & Islands                      | 6                 | 17.2297220  | 40.4761110  | 191364     | 0                                                           | 0                   | 0             | 0              | 0           |
| taraz          | kz      | Northern Central Asian Highlands                 | 1                 | 71.3666670  | 42.9000000  | 358167     | 0                                                           | 0                   | 0             | 0              | 0           |
| targu-mures    | ro      | Dniester - Lower Danube                          | 3                 | 24.5666670  | 46.5500000  | 146864     | 0                                                           | 0                   | 0             | 0              | 0           |
| tarhunah       | ly      | Sahara                                           | 1                 | 13.6333333  | 32.4333333  | 210698     | 0                                                           | 0                   | 0             | 0              | 0           |

Table S2 Cities and freshwater reptiles

| City          | Country | Freshwater Ecoregions of the World (FEOW) Region | Regional richness | Longitude   | Latitude    | Population | # of freshwater reptile species within 50 km of city centre |                     |               |                |             |
|---------------|---------|--------------------------------------------------|-------------------|-------------|-------------|------------|-------------------------------------------------------------|---------------------|---------------|----------------|-------------|
|               |         |                                                  |                   |             |             |            | Lizard species                                              | Crocodilian species | Snake species | Turtle species | All species |
| tarija        | bo      | Chaco                                            | 3                 | -64.7500000 | -21.5166667 | 159275     | 0                                                           | 0                   | 0             | 0              | 0           |
| tarlac        | ph      | Northern Philippine Islands                      | 1                 | 120.5919320 | 15.4894490  | 182413     | 0                                                           | 0                   | 0             | 0              | 0           |
| tarnow        | pl      | Central & Western Europe                         | 13                | 20.9552700  | 50.0061050  | 117799     | 0                                                           | 0                   | 0             | 1              | 1           |
| tarragona     | es      | Eastern Iberia                                   | 13                | 1.2500000   | 41.1166670  | 128391     | 0                                                           | 0                   | 0             | 5              | 5           |
| tarsus        | tr      | Southern Anatolia                                | 2                 | 34.8784040  | 36.9187600  | 256617     | 0                                                           | 0                   | 0             | 0              | 0           |
| tartu         | ee      | Southern Baltic Lowlands                         | 0                 | 26.7361111  | 58.3661111  | 101092     | 0                                                           | 0                   | 0             | 0              | 0           |
| tartus        | sy      | Coastal Levant                                   | 1                 | 35.8833333  | 34.8833333  | 107081     | 0                                                           | 0                   | 0             | 0              | 0           |
| tashkent      | uz      | Northern Central Asian Highlands                 | 1                 | 69.2500000  | 41.3166667  | 1978078    | 0                                                           | 0                   | 0             | 0              | 0           |
| tasikmalaya   | id      | Indian Ocean Slope of Sumatra & Java             | 9                 | 108.2207000 | -7.3274000  | 271160     | 1                                                           | 0                   | 0             | 1              | 2           |
| taubate       | br      | Paraiba do Sul                                   | 0                 | -45.5500000 | -23.0333330 | 251647     | 0                                                           | 0                   | 0             | 0              | 0           |
| taunggyi      | mm      | Lower & Middle Salween                           | 5                 | 97.0333333  | 20.7833333  | 160136     | 0                                                           | 0                   | 0             | 0              | 0           |
| tauranga      | nz      | New Zealand                                      | 2                 | 176.1666670 | -37.6861110 | 110338     | 0                                                           | 0                   | 0             | 0              | 0           |
| tawau         | my      | Northeastern Borneo                              | 7                 | 117.8871000 | 4.2498000   | 306497     | 1                                                           | 0                   | 0             | 1              | 2           |
| taytay        | ph      | Northern Philippine Islands                      | 1                 | 121.1394000 | 14.5678000  | 231475     | 0                                                           | 0                   | 0             | 0              | 0           |
| tbilisi       | ge      | Kura - South Caspian Drainages                   | 4                 | 44.7908333  | 41.7250000  | 1049516    | 0                                                           | 0                   | 0             | 1              | 1           |
| tebingtinggi  | id      | Northern Central Sumatra - Western Malaysia      | 7                 | 99.1625000  | 3.3285000   | 117547     | 0                                                           | 0                   | 0             | 0              | 0           |
| tegal         | id      | Central & Eastern Java                           | 4                 | 109.1402000 | -6.8694000  | 237110     | 0                                                           | 0                   | 0             | 0              | 0           |
| tegucigalpa   | hn      | Chiapas - Fonseca                                | 11                | -87.2166667 | 14.1000000  | 850961     | 1                                                           | 0                   | 0             | 2              | 3           |
| tehuacan      | mx      | Papaloapan                                       | 13                | -97.3833330 | 18.4500000  | 241437     | 0                                                           | 0                   | 0             | 1              | 1           |
| tekirdag      | tr      | Thrace                                           | 3                 | 27.5085240  | 40.9780120  | 122350     | 0                                                           | 0                   | 0             | 0              | 0           |
| tel aviv-yafo | il      | Coastal Levant                                   | 1                 | 34.7647220  | 32.0677780  | 370480     | 0                                                           | 0                   | 0             | 0              | 0           |
| teluknaga     | id      | Southern Sumatra - Western Java                  | 8                 | 106.6441670 | -6.0650000  | 128336     | 1                                                           | 2                   | 2             | 0              | 5           |
| tema          | gh      | Ashanti                                          | 1                 | -0.0166667  | 5.6166667   | 351556     | 0                                                           | 0                   | 0             | 0              | 0           |
| tembisa       | za      | Southern Temperate Highveld                      | 5                 | 28.2268020  | -25.9963630 | 511671     | 0                                                           | 1                   | 1             | 2              | 4           |

Table S2 Cities and freshwater reptiles

| City          | Country | Freshwater Ecoregions of the World (FEOW) Region | Regional richness | Longitude    | Latitude    | Population | # of freshwater reptile species within 50 km of city centre |                     |               |                |             |
|---------------|---------|--------------------------------------------------|-------------------|--------------|-------------|------------|-------------------------------------------------------------|---------------------|---------------|----------------|-------------|
|               |         |                                                  |                   |              |             |            | Lizard species                                              | Crocodilian species | Snake species | Turtle species | All species |
| temirtau      | kz      | Ob                                               | 0                 | 72.9483330   | 50.0544440  | 172809     | 0                                                           | 0                   | 0             | 0              | 0           |
| tempe         | us      | Gila                                             | 10                | -111.9086111 | 33.4147222  | 158368     | 0                                                           | 0                   | 0             | 2              | 2           |
| temuco        | cl      | South Andean Pacific Slopes                      | 0                 | -72.6000000  | -38.7333330 | 238131     | 0                                                           | 0                   | 0             | 0              | 0           |
| tenali        | in      | Southern Deccan Plateau                          | 0                 | 80.5833330   | 16.2500000  | 151793     | 0                                                           | 0                   | 0             | 0              | 0           |
| tengzhou      | cn      | Lower Yangtze                                    | 4                 | 117.1517580  | 35.0770610  | 105456     | 0                                                           | 0                   | 0             | 0              | 0           |
| teofilo otoni | br      | Northeastern Mata Atlantica                      | 1                 | -41.5000000  | -17.8500000 | 101172     | 0                                                           | 0                   | 0             | 0              | 0           |
| tepic         | mx      | Rio Santiago                                     | 13                | -104.9000000 | 21.5000000  | 280602     | 0                                                           | 1                   | 0             | 3              | 4           |
| teresina      | br      | Parnaiba                                         | 0                 | -42.8166670  | -5.0833330  | 744526     | 0                                                           | 0                   | 0             | 0              | 0           |
| teresopolis   | br      | Paraiba do Sul                                   | 0                 | -42.9680130  | -22.4240640 | 123980     | 0                                                           | 1                   | 0             | 0              | 1           |
| termiz        | uz      | Middle Amu Darya                                 | 1                 | 67.2783333   | 37.2241667  | 140404     | 0                                                           | 0                   | 0             | 0              | 0           |
| ternate       | id      | Placemark                                        | #N/A              | 127.4000000  | 0.8000000   | 101736     | 0                                                           | 0                   | 0             | 0              | 0           |
| terni         | it      | Italian Peninsula & Islands                      | 6                 | 12.6166670   | 42.5666670  | 108006     | 0                                                           | 0                   | 0             | 1              | 1           |
| terrassa      | es      | Eastern Iberia                                   | 13                | 2.0080560    | 41.5611110  | 187770     | 0                                                           | 0                   | 0             | 11             | 11          |
| teshie        | gh      | Ashanti                                          | 1                 | -0.1000000   | 5.5833333   | 144012     | 0                                                           | 0                   | 0             | 0              | 0           |
| tete          | mz      | Lower Zambezi                                    | 3                 | 33.5866667   | -16.1563889 | 129316     | 0                                                           | 0                   | 0             | 0              | 0           |
| tetouan       | ma      | Atlantic Northwest Africa                        | 3                 | -5.3724240   | 35.5710910  | 365355     | 0                                                           | 0                   | 0             | 2              | 2           |
| texcoco       | mx      | Lerma - Chapala                                  | 10                | -98.8833330  | 19.5166670  | 115384     | 0                                                           | 0                   | 0             | 5              | 5           |
| thai nguyen   | vn      | Song Hong                                        | 1                 | 105.8441670  | 21.5927780  | 133882     | 0                                                           | 0                   | 0             | 0              | 0           |
| thana         | in      | Western Ghats                                    | 4                 | 72.9666670   | 19.2000000  | 1486453    | 0                                                           | 0                   | 0             | 0              | 0           |
| thanesar      | in      | Lower & Middle Indus                             | 2                 | 76.8166670   | 29.9833330  | 138288     | 0                                                           | 0                   | 0             | 0              | 0           |
| thanh hoa     | vn      | Song Hong                                        | 1                 | 105.7666670  | 19.8000000  | 112482     | 0                                                           | 0                   | 0             | 0              | 0           |
| thanjavur     | in      | Southeastern Ghats                               | 3                 | 79.1500000   | 10.8000000  | 219591     | 0                                                           | 0                   | 0             | 0              | 0           |
| thanyaburi    | th      | Chao Phraya                                      | 12                | 100.7343340  | 14.0211390  | 123382     | 1                                                           | 0                   | 0             | 7              | 8           |
| thaton        | mm      | Lower & Middle Salween                           | 5                 | 97.3713889   | 16.9205556  | 123742     | 0                                                           | 0                   | 0             | 0              | 0           |
| the hague     | nl      | Central & Western Europe                         | 13                | 4.3000000    | 52.0833330  | 476587     | 0                                                           | 0                   | 0             | 0              | 0           |

Table S2 Cities and freshwater reptiles

| City               | Country | Freshwater Ecoregions of the World (FEOW) Region | Regional richness | Longitude    | Latitude   | Population | # of freshwater reptile species within 50 km of city centre |                     |               |                |             |
|--------------------|---------|--------------------------------------------------|-------------------|--------------|------------|------------|-------------------------------------------------------------|---------------------|---------------|----------------|-------------|
|                    |         |                                                  |                   |              |            |            | Lizard species                                              | Crocodilian species | Snake species | Turtle species | All species |
| thessaloniki       | gr      | Thrace                                           | 3                 | 22.9438889   | 40.6402778 | 354291     | 0                                                           | 0                   | 0             | 0              | 0           |
| thies              | sn      | Senegal - Gambia                                 | 4                 | -16.9333333  | 14.8000000 | 320721     | 1                                                           | 1                   | 0             | 0              | 2           |
| thiruvananthapuram | in      | Western Ghats                                    | 4                 | 76.9569440   | 8.5069440  | 784223     | 0                                                           | 0                   | 0             | 0              | 0           |
| thornton           | us      | Middle Missouri                                  | 12                | -104.9713889 | 39.8680556 | 104658     | 0                                                           | 0                   | 0             | 5              | 5           |
| thousand oaks      | us      | Southern California Coastal - Baja California    | 12                | -118.8366667 | 34.1705556 | 127942     | 0                                                           | 0                   | 0             | 5              | 5           |
| thrissur           | in      | Western Ghats                                    | 4                 | 76.2166670   | 10.5166670 | 325140     | 0                                                           | 0                   | 0             | 0              | 0           |
| tianjin            | cn      | Lower Huang He                                   | 0                 | 117.1766670  | 39.1422220 | 3766207    | 0                                                           | 0                   | 0             | 0              | 0           |
| tianmen            | cn      | Lower Yangtze                                    | 4                 | 113.1000000  | 30.6500000 | 224871     | 0                                                           | 0                   | 0             | 0              | 0           |
| tieli              | cn      | Songhua Jiang                                    | 0                 | 128.0500000  | 46.9500000 | 109636     | 0                                                           | 0                   | 0             | 0              | 0           |
| tieling            | cn      | Liao He                                          | 0                 | 123.8413890  | 42.2930560 | 333907     | 0                                                           | 0                   | 0             | 0              | 0           |
| tighina            | md      | Dniester - Lower Danube                          | 3                 | 29.4711110   | 46.8305560 | 128403     | 0                                                           | 0                   | 0             | 0              | 0           |
| tijuana            | mx      | Southern California Coastal - Baja California    | 12                | -117.0166670 | 32.5333330 | 1376494    | 0                                                           | 0                   | 0             | 5              | 5           |
| tilburg            | nl      | Central & Western Europe                         | 13                | 5.1063310    | 51.5769220 | 206858     | 0                                                           | 0                   | 0             | 2              | 2           |
| timisoara          | ro      | Dniester - Lower Danube                          | 3                 | 21.2272220   | 45.7494440 | 315055     | 0                                                           | 0                   | 0             | 0              | 0           |
| timon              | br      | Parnaiba                                         | 0                 | -42.8166670  | -5.1000000 | 124429     | 0                                                           | 0                   | 0             | 0              | 0           |
| tirana             | al      | Southeast Adriatic Drainages                     | 2                 | 19.8188889   | 41.3275000 | 374801     | 0                                                           | 0                   | 0             | 0              | 0           |
| tiruchchirappalli  | in      | Southeastern Ghats                               | 3                 | 78.6855560   | 10.8050000 | 775551     | 0                                                           | 0                   | 0             | 0              | 0           |
| tirunelveli        | in      | Southeastern Ghats                               | 3                 | 77.7000000   | 8.7333330  | 435882     | 0                                                           | 0                   | 0             | 0              | 0           |
| tirupati           | in      | Southeastern Ghats                               | 3                 | 79.4166670   | 13.6500000 | 250849     | 0                                                           | 0                   | 0             | 0              | 0           |
| tiruppur           | in      | Southeastern Ghats                               | 3                 | 77.3500000   | 11.1000000 | 397554     | 0                                                           | 0                   | 0             | 0              | 0           |
| tiruvannamalai     | in      | Southeastern Ghats                               | 3                 | 79.0666670   | 12.2166670 | 138255     | 0                                                           | 0                   | 0             | 0              | 0           |
| tiruvottiyur       | in      | Southeastern Ghats                               | 3                 | 80.3041670   | 13.1577780 | 229019     | 0                                                           | 1                   | 0             | 0              | 1           |
| titagarh           | in      | Ganges Delta & Plain                             | 13                | 88.3736110   | 22.7363890 | 127763     | 1                                                           | 0                   | 0             | 0              | 1           |
| tlalnepantla       | mx      | Lerma - Chapala                                  | 10                | -99.2216670  | 19.5269440 | 715798     | 0                                                           | 0                   | 0             | 5              | 5           |

Table S2 Cities and freshwater reptiles

| City         | Country | Freshwater Ecoregions of the World (FEOW) Region   | Regional richness | Longitude    | Latitude    | Population | # of freshwater reptile species within 50 km of city centre |                     |               |                |             |
|--------------|---------|----------------------------------------------------|-------------------|--------------|-------------|------------|-------------------------------------------------------------|---------------------|---------------|----------------|-------------|
|              |         |                                                    |                   |              |             |            | Lizard species                                              | Crocodilian species | Snake species | Turtle species | All species |
| tlaquepaque  | mx      | Rio Santiago                                       | 13                | -103.3166670 | 20.6500000  | 493667     | 0                                                           | 0                   | 0             | 3              | 3           |
| toamasina    | mg      | Madagascar Eastern Lowlands                        | 2                 | 49.3833333   | -18.1666667 | 206390     | 0                                                           | 1                   | 0             | 0              | 1           |
| toda         | jp      | Honshu - Shikoku - Kyushu                          | 5                 | 139.6925000  | 35.8094440  | 118733     | 0                                                           | 0                   | 0             | 3              | 3           |
| tokat        | tr      | Northern Anatolia                                  | 2                 | 36.5544440   | 40.3138890  | 129768     | 0                                                           | 0                   | 0             | 0              | 0           |
| tokorozawa   | jp      | Honshu - Shikoku - Kyushu                          | 5                 | 139.4677780  | 35.7863890  | 339441     | 0                                                           | 0                   | 0             | 3              | 3           |
| tokuyama     | jp      | Honshu - Shikoku - Kyushu                          | 5                 | 131.8166670  | 34.0500000  | 101134     | 0                                                           | 0                   | 0             | 0              | 0           |
| tokyo        | jp      | Honshu - Shikoku - Kyushu                          | 5                 | 139.7513890  | 35.6850000  | 31480498   | 0                                                           | 0                   | 0             | 3              | 3           |
| toledo       | us      | Laurentian Great Lakes                             | 16                | -83.5552778  | 41.6638889  | 306974     | 0                                                           | 0                   | 0             | 6              | 6           |
| toledo       | ph      | Northern Philippine Islands                        | 1                 | 123.6386000  | 10.3773000  | 156915     | 0                                                           | 0                   | 0             | 6              | 6           |
| toliary      | mg      | Western Madagascar                                 | 2                 | 43.6666667   | -23.3500000 | 115328     | 0                                                           | 0                   | 0             | 0              | 0           |
| toluca       | mx      | Lerma - Chapala                                    | 10                | -99.6672220  | 19.2883330  | 505903     | 0                                                           | 0                   | 0             | 2              | 2           |
| tolyatti     | ru      | Volga - Ural                                       | 0                 | 49.3461000   | 53.5303000  | 718495     | 0                                                           | 0                   | 0             | 0              | 0           |
| tomakomai    | jp      | Sakhalin, Hokkaido, & Sikhote - Alin Coast         | 0                 | 141.6033330  | 42.6369440  | 174808     | 0                                                           | 0                   | 0             | 0              | 0           |
| toms river   | us      | Northeast US & Southeast Canada Atlantic Drainages | 18                | -74.1983333  | 39.9536111  | 119088     | 0                                                           | 0                   | 0             | 10             | 10          |
| tomsk        | ru      | Ob                                                 | 0                 | 84.9741670   | 56.4941670  | 485523     | 0                                                           | 0                   | 0             | 0              | 0           |
| tonala       | mx      | Rio Santiago                                       | 13                | -103.2333330 | 20.6166670  | 401616     | 0                                                           | 0                   | 0             | 3              | 3           |
| tondabayashi | jp      | Honshu - Shikoku - Kyushu                          | 5                 | 135.6000000  | 34.5000000  | 132875     | 0                                                           | 0                   | 0             | 1              | 1           |
| tongchuan    | cn      | Lower Huang He                                     | 0                 | 108.9505620  | 34.8987990  | 223603     | 0                                                           | 0                   | 0             | 0              | 0           |
| tongliao     | cn      | Liao He                                            | 0                 | 122.2652780  | 43.6125000  | 261110     | 0                                                           | 0                   | 0             | 0              | 0           |
| tongling     | cn      | Lower Yangtze                                      | 4                 | 117.8166670  | 30.9333330  | 312588     | 0                                                           | 0                   | 0             | 0              | 0           |
| tongzhou     | cn      | Lower Huang He                                     | 0                 | 116.5994440  | 39.9052780  | 163326     | 0                                                           | 0                   | 0             | 0              | 0           |
| tonk         | in      | Ganges Delta & Plain                               | 13                | 75.7833330   | 26.1666670  | 151341     | 0                                                           | 0                   | 0             | 0              | 0           |
| topeka       | us      | Middle Missouri                                    | 12                | -95.6777778  | 39.0483333  | 121570     | 0                                                           | 0                   | 0             | 4              | 4           |
| toronto      | ca      | Laurentian Great Lakes                             | 16                | -79.4166670  | 43.6666670  | 4612187    | 0                                                           | 0                   | 0             | 6              | 6           |

Table S2 Cities and freshwater reptiles

| City              | Country | Freshwater Ecoregions of the World (FEOW) Region | Regional richness | Longitude    | Latitude    | Population | # of freshwater reptile species within 50 km of city centre |                     |               |                |             |
|-------------------|---------|--------------------------------------------------|-------------------|--------------|-------------|------------|-------------------------------------------------------------|---------------------|---------------|----------------|-------------|
|                   |         |                                                  |                   |              |             |            | Lizard species                                              | Crocodilian species | Snake species | Turtle species | All species |
| torrance          | us      | Southern California Coastal - Baja California    | 12                | -118.3397222 | 33.8358333  | 144963     | 0                                                           | 0                   | 0             | 8              | 8           |
| torrejon de ardoz | es      | Western Iberia                                   | 6                 | -3.4697340   | 40.4553540  | 111998     | 0                                                           | 0                   | 0             | 3              | 3           |
| torreon           | mx      | Mayran - Viesca                                  | 4                 | -103.4333330 | 25.5500000  | 524084     | 0                                                           | 0                   | 0             | 1              | 1           |
| torun             | pl      | Central & Western Europe                         | 13                | 18.6048440   | 53.0358310  | 208717     | 0                                                           | 0                   | 0             | 1              | 1           |
| tottori           | jp      | Honshu - Shikoku - Kyushu                        | 5                 | 134.2333330  | 35.5000000  | 154099     | 0                                                           | 0                   | 0             | 0              | 0           |
| touliu            | tw      | Western Taiwan                                   | 2                 | 120.5422222  | 23.7091667  | 104726     | 0                                                           | 0                   | 0             | 0              | 0           |
| toulon            | fr      | Cantabric Coast - Languedoc                      | 10                | 5.9417120    | 43.1177050  | 154465     | 0                                                           | 0                   | 0             | 2              | 2           |
| toulouse          | fr      | Cantabric Coast - Languedoc                      | 10                | 1.4331880    | 43.5995160  | 411145     | 0                                                           | 0                   | 0             | 1              | 1           |
| toungoo           | mm      | Sitang - Irawaddy                                | 0                 | 96.4333333   | 18.9333333  | 106959     | 0                                                           | 0                   | 0             | 0              | 0           |
| tours             | fr      | Central & Western Europe                         | 13                | 0.7039770    | 47.3948360  | 135143     | 0                                                           | 0                   | 0             | 3              | 3           |
| townsville        | au      | Arafura - Carpentaria                            | 23                | 146.8056950  | -19.2663900 | 138959     | 0                                                           | 2                   | 0             | 1              | 3           |
| toyohashi         | jp      | Honshu - Shikoku - Kyushu                        | 5                 | 137.3833330  | 34.7666670  | 378377     | 0                                                           | 0                   | 0             | 2              | 2           |
| toyokawa          | jp      | Honshu - Shikoku - Kyushu                        | 5                 | 137.4000000  | 34.8166670  | 120538     | 0                                                           | 0                   | 0             | 2              | 2           |
| toyonaka          | jp      | Honshu - Shikoku - Kyushu                        | 5                 | 135.4666670  | 34.7833330  | 384463     | 0                                                           | 0                   | 0             | 2              | 2           |
| toyota            | jp      | Honshu - Shikoku - Kyushu                        | 5                 | 137.1500000  | 35.0833330  | 362386     | 0                                                           | 0                   | 0             | 2              | 2           |
| trabzon           | tr      | Western Transcaucasia                            | 0                 | 39.7269440   | 41.0050000  | 244209     | 0                                                           | 0                   | 0             | 0              | 0           |
| trelew            | ar      | Patagonia                                        | 0                 | -65.3132950  | -43.2500750 | 107883     | 0                                                           | 0                   | 0             | 0              | 0           |
| trento            | it      | Gulf of Venice Drainages                         | 8                 | 11.1333330   | 46.0666670  | 106703     | 0                                                           | 0                   | 0             | 5              | 5           |
| trier             | de      | Central & Western Europe                         | 13                | 6.6333330    | 49.7500000  | 100649     | 0                                                           | 0                   | 0             | 2              | 2           |
| trieste           | it      | Gulf of Venice Drainages                         | 8                 | 13.7800000   | 45.6486110  | 204379     | 0                                                           | 0                   | 0             | 1              | 1           |
| trincomalee       | lk      | Sri Lanka Dry Zone                               | 5                 | 81.2333333   | 8.5666667   | 108434     | 0                                                           | 0                   | 0             | 0              | 0           |
| tripoli           | ly      | Sahara                                           | 1                 | 13.1800000   | 32.8925000  | 1150990    | 0                                                           | 0                   | 0             | 0              | 0           |
| trois-rivieres    | ca      | St. Lawrence                                     | 10                | -72.5500000  | 46.3500000  | 119693     | 0                                                           | 0                   | 0             | 0              | 0           |
| trondheim         | no      | Norwegian Sea Drainages                          | 0                 | 10.4166670   | 63.4166670  | 146930     | 0                                                           | 0                   | 0             | 0              | 0           |
| trujillo          | pe      | Central Andean Pacific Slopes                    | 0                 | -79.0333333  | -8.1166667  | 750004     | 0                                                           | 0                   | 0             | 0              | 0           |

Table S2 Cities and freshwater reptiles

| City             | Country | Freshwater Ecoregions of the World (FEOW) Region | Regional richness | Longitude    | Latitude    | Population | # of freshwater reptile species within 50 km of city centre |                     |               |                |             |
|------------------|---------|--------------------------------------------------|-------------------|--------------|-------------|------------|-------------------------------------------------------------|---------------------|---------------|----------------|-------------|
|                  |         |                                                  |                   |              |             |            | Lizard species                                              | Crocodilian species | Snake species | Turtle species | All species |
| tshikapa         | cd      | Kasai                                            | 1                 | 20.8000000   | -6.4166670  | 267508     | 0                                                           | 0                   | 0             | 0              | 0           |
| tsuchiura        | jp      | Honshu - Shikoku - Kyushu                        | 5                 | 140.2104730  | 36.0904690  | 136386     | 0                                                           | 0                   | 0             | 1              | 1           |
| tsukuba          | jp      | Honshu - Shikoku - Kyushu                        | 5                 | 140.1166670  | 36.0833330  | 175593     | 0                                                           | 0                   | 0             | 1              | 1           |
| tubruq           | ly      | Sahara                                           | 1                 | 23.9763889   | 32.0836111  | 121052     | 0                                                           | 0                   | 0             | 0              | 0           |
| tucheng          | tw      | Western Taiwan                                   | 2                 | 121.4333333  | 24.9833333  | 332405     | 0                                                           | 0                   | 0             | 2              | 2           |
| tucson           | us      | Gila                                             | 10                | -110.9258333 | 32.2216667  | 518907     | 0                                                           | 0                   | 0             | 5              | 5           |
| tucuman          | ar      | Mar Chiquita - Salinas Grandes                   | 1                 | -65.2226000  | -26.8241440 | 828402     | 0                                                           | 0                   | 0             | 0              | 0           |
| tuguegarao       | ph      | Northern Philippine Islands                      | 1                 | 121.7281000  | 17.6125000  | 116665     | 0                                                           | 0                   | 0             | 0              | 0           |
| tula             | ru      | Volga - Ural                                     | 0                 | 37.6442940   | 54.2021330  | 468830     | 0                                                           | 0                   | 0             | 0              | 0           |
| tulancingo       | mx      | Panuco                                           | 12                | -98.3666670  | 20.0833330  | 102388     | 0                                                           | 0                   | 0             | 0              | 0           |
| tulsa            | us      | Central Prairie                                  | 17                | -95.9925000  | 36.1538889  | 382005     | 0                                                           | 0                   | 1             | 10             | 11          |
| tulua            | co      | Magdalena - Sinu                                 | 15                | -76.1953600  | 4.0846560   | 165504     | 0                                                           | 1                   | 0             | 0              | 1           |
| tumbes           | pe      | North Andean Pacific Slopes - Rio Atrato         | 14                | -80.4413889  | -3.5666667  | 109599     | 0                                                           | 0                   | 0             | 0              | 0           |
| tumkur           | in      | Southeastern Ghats                               | 3                 | 77.1016670   | 13.3422220  | 307384     | 0                                                           | 0                   | 0             | 0              | 0           |
| tungi            | bd      | Ganges Delta & Plain                             | 13                | 90.4058333   | 23.8900000  | 337620     | 0                                                           | 0                   | 0             | 0              | 0           |
| tunis            | tn      | Mediterranean Northwest Africa                   | 2                 | 10.1710780   | 36.8061120  | 692816     | 0                                                           | 0                   | 0             | 0              | 0           |
| tunja            | co      | Magdalena - Sinu                                 | 15                | -73.3677780  | 5.5352780   | 117480     | 0                                                           | 0                   | 0             | 0              | 0           |
| turgutlu         | tr      | Western Anatolia                                 | 5                 | 27.6996970   | 38.4953320  | 103346     | 0                                                           | 0                   | 0             | 0              | 0           |
| turhal           | tr      | Northern Anatolia                                | 2                 | 36.0811110   | 40.3875000  | 110941     | 0                                                           | 0                   | 0             | 0              | 0           |
| turin            | it      | Gulf of Venice Drainages                         | 8                 | 7.6666670    | 45.0500000  | 846489     | 0                                                           | 0                   | 0             | 3              | 3           |
| turkmenabat      | tm      | Middle Amu Darya                                 | 1                 | 63.5750000   | 39.1013889  | 234828     | 0                                                           | 0                   | 0             | 0              | 0           |
| turku            | fi      | Northern Baltic Drainages                        | 2                 | 22.2833330   | 60.4500000  | 175944     | 0                                                           | 0                   | 0             | 0              | 0           |
| turmero          | ve      | Orinoco Piedmont                                 | 10                | -67.4833333  | 10.2333333  | 344746     | 0                                                           | 0                   | 0             | 1              | 1           |
| tuxtla gutierrez | mx      | Grijalva - Usumacinta                            | 18                | -93.1166670  | 16.7500000  | 481143     | 1                                                           | 2                   | 0             | 3              | 6           |
| tuzla            | ba      | Dniester - Lower Danube                          | 3                 | 18.6694444   | 44.5427778  | 142484     | 0                                                           | 0                   | 0             | 0              | 0           |

Table S2 Cities and freshwater reptiles

| City             | Country | Freshwater Ecoregions of the World (FEOW) Region | Regional richness | Longitude   | Latitude    | Population | # of freshwater reptile species within 50 km of city centre |                     |               |                |             |
|------------------|---------|--------------------------------------------------|-------------------|-------------|-------------|------------|-------------------------------------------------------------|---------------------|---------------|----------------|-------------|
|                  |         |                                                  |                   |             |             |            | Lizard species                                              | Crocodilian species | Snake species | Turtle species | All species |
| tver             | ru      | Volga - Ural                                     | 0                 | 35.8760270  | 56.8604910  | 400216     | 0                                                           | 0                   | 0             | 0              | 0           |
| tychy            | pl      | Central & Western Europe                         | 13                | 18.9664100  | 50.1371670  | 131696     | 0                                                           | 0                   | 0             | 1              | 1           |
| tyumen           | ru      | Ob                                               | 0                 | 65.5272220  | 57.1522220  | 519124     | 0                                                           | 0                   | 0             | 0              | 0           |
| ube              | jp      | Honshu - Shikoku - Kyushu                        | 5                 | 131.2511110 | 33.9430560  | 173735     | 0                                                           | 0                   | 0             | 0              | 0           |
| uberaba          | br      | Upper Parana                                     | 3                 | -47.9166670 | -19.7500000 | 260847     | 0                                                           | 0                   | 0             | 0              | 0           |
| uberlandia       | br      | Upper Parana                                     | 3                 | -48.3000000 | -18.9166670 | 563545     | 0                                                           | 0                   | 0             | 0              | 0           |
| ubon ratchathani | th      | Khorat Plateau (Mekong)                          | 5                 | 104.8486590 | 15.2384400  | 122533     | 0                                                           | 0                   | 0             | 0              | 0           |
| udgir            | in      | Northern Deccan Plateau                          | 2                 | 77.1166670  | 18.3833330  | 101072     | 0                                                           | 0                   | 0             | 0              | 0           |
| udon thani       | th      | Khorat Plateau (Mekong)                          | 5                 | 102.7858890 | 17.4156670  | 247232     | 0                                                           | 0                   | 0             | 0              | 0           |
| udupi            | in      | Western Ghats                                    | 4                 | 74.7500000  | 13.3500000  | 129124     | 0                                                           | 0                   | 0             | 0              | 0           |
| ueda             | jp      | Honshu - Shikoku - Kyushu                        | 5                 | 138.2666670 | 36.4000000  | 126607     | 0                                                           | 0                   | 0             | 0              | 0           |
| ufa              | ru      | Volga - Ural                                     | 0                 | 56.0456210  | 54.7851670  | 1033350    | 0                                                           | 0                   | 0             | 0              | 0           |
| ugep             | ng      | Northern Gulf of Guinea Drainages - Bioko        | 1                 | 8.0812000   | 5.8086000   | 200293     | 0                                                           | 0                   | 0             | 0              | 0           |
| uitenhage        | za      | Cape Fold                                        | 3                 | 25.3970990  | -33.7575700 | 228924     | 0                                                           | 0                   | 1             | 1              | 2           |
| uji              | jp      | Honshu - Shikoku - Kyushu                        | 5                 | 135.8000000 | 34.8833330  | 192926     | 0                                                           | 0                   | 0             | 2              | 2           |
| ujjain           | in      | Ganges Delta & Plain                             | 13                | 75.7666670  | 23.1833330  | 457395     | 0                                                           | 0                   | 0             | 0              | 0           |
| ukhta            | ru      | Barents Sea Drainages                            | 0                 | 53.6834780  | 63.5670540  | 102188     | 0                                                           | 0                   | 0             | 0              | 0           |
| ulaanbaatar      | mn      | Lake Baikal                                      | 0                 | 106.9166667 | 47.9166667  | 844786     | 0                                                           | 0                   | 0             | 0              | 0           |
| ulan-ude         | ru      | Lake Baikal                                      | 0                 | 107.6097940 | 51.8260530  | 360281     | 0                                                           | 0                   | 0             | 0              | 0           |
| ulhasnagar       | in      | Western Ghats                                    | 4                 | 73.1500000  | 19.2166670  | 516625     | 0                                                           | 0                   | 0             | 0              | 0           |
| ulm              | de      | Upper Danube                                     | 5                 | 10.0000000  | 48.4000000  | 120745     | 0                                                           | 0                   | 0             | 2              | 2           |
| ulubaria         | in      | Ganges Delta & Plain                             | 13                | 88.1136110  | 22.4716670  | 222293     | 1                                                           | 0                   | 0             | 0              | 1           |
| ulyanovsk        | ru      | Volga - Ural                                     | 0                 | 48.3865700  | 54.3282410  | 640685     | 0                                                           | 0                   | 0             | 0              | 0           |
| umm durman       | sd      | Upper Nile                                       | 2                 | 32.4372222  | 15.6361111  | 2810328    | 0                                                           | 0                   | 0             | 0              | 0           |
| umuahia          | ng      | Niger Delta                                      | 0                 | 7.4895890   | 5.5262690   | 264680     | 0                                                           | 0                   | 0             | 0              | 0           |

Table S2 Cities and freshwater reptiles

| City       | Country | Freshwater Ecoregions of the World (FEOW) Region | Regional richness | Longitude    | Latitude    | Population | # of freshwater reptile species within 50 km of city centre |                     |               |                |             |
|------------|---------|--------------------------------------------------|-------------------|--------------|-------------|------------|-------------------------------------------------------------|---------------------|---------------|----------------|-------------|
|            |         |                                                  |                   |              |             |            | Lizard species                                              | Crocodilian species | Snake species | Turtle species | All species |
| ungaran    | id      | Central & Eastern Java                           | 4                 | 110.4050000  | -7.1397220  | 127873     | 0                                                           | 0                   | 1             | 0              | 1           |
| unnao      | in      | Ganges Delta & Plain                             | 13                | 80.5000000   | 26.5333330  | 161687     | 0                                                           | 0                   | 0             | 0              | 0           |
| uppsala    | se      | Northern Baltic Drainages                        | 2                 | 17.6333330   | 59.8500000  | 127734     | 0                                                           | 0                   | 0             | 1              | 1           |
| uppsala    | se      | Northern Baltic Drainages                        | 2                 | 17.6333330   | 59.8666670  | 127734     | 0                                                           | 0                   | 0             | 1              | 1           |
| urasoe     | jp      | Honshu - Shikoku - Kyushu                        | 5                 | 127.7301240  | 26.2590230  | 110284     | 0                                                           | 0                   | 0             | 2              | 2           |
| urayasu    | jp      | Honshu - Shikoku - Kyushu                        | 5                 | 139.9085480  | 35.6633380  | 143761     | 0                                                           | 0                   | 0             | 3              | 3           |
| urayasu    | jp      | Honshu - Shikoku - Kyushu                        | 5                 | 139.8886110  | 35.6705560  | 143761     | 0                                                           | 0                   | 0             | 3              | 3           |
| urdaneta   | ph      | Northern Philippine Islands                      | 1                 | 120.5711110  | 15.9761110  | 102827     | 0                                                           | 0                   | 0             | 0              | 0           |
| urfa       | tr      | Lower Tigris & Euphrates                         | 1                 | 38.7939190   | 37.1670800  | 449785     | 0                                                           | 0                   | 0             | 0              | 0           |
| uromi      | ng      | Lower Niger - Benue                              | 2                 | 6.3284340    | 6.7072940   | 108617     | 0                                                           | 0                   | 0             | 0              | 0           |
| uruapan    | mx      | Rio Balsas                                       | 10                | -102.0666670 | 19.4166670  | 237319     | 1                                                           | 0                   | 0             | 0              | 1           |
| uruguaiana | br      | Lower Uruguay                                    | 3                 | -57.0833330  | -29.7500000 | 123482     | 0                                                           | 0                   | 0             | 0              | 0           |
| urumqi     | cn      | Dzungaria                                        | 0                 | 87.6004590   | 43.8009650  | 1508225    | 0                                                           | 0                   | 0             | 0              | 0           |
| usak       | tr      | Western Anatolia                                 | 5                 | 29.4057990   | 38.6735110  | 152943     | 0                                                           | 0                   | 0             | 0              | 0           |
| ussuriysk  | ru      | Sakhalin, Hokkaido, & Sikhote - Alin Coast       | 0                 | 132.0094440  | 43.8025000  | 157071     | 0                                                           | 0                   | 0             | 0              | 0           |
| ust-ilimsk | ru      | Yenisei                                          | 0                 | 102.6619440  | 58.0005560  | 100272     | 0                                                           | 0                   | 0             | 0              | 0           |
| utrecht    | nl      | Central & Western Europe                         | 13                | 5.1190950    | 52.0938130  | 267044     | 0                                                           | 0                   | 0             | 0              | 0           |
| uvira      | cd      | Lake Tanganyika                                  | 3                 | 29.1458330   | -3.4066670  | 170422     | 0                                                           | 0                   | 0             | 0              | 0           |
| uyo        | ng      | Niger Delta                                      | 0                 | 7.9265700    | 5.0333330   | 124690     | 0                                                           | 0                   | 0             | 0              | 0           |
| uzhhorod   | ua      | Dniester - Lower Danube                          | 3                 | 22.3000000   | 48.6166670  | 117877     | 0                                                           | 0                   | 0             | 0              | 0           |
| vadodara   | in      | Namuda - Tapi                                    | 1                 | 73.2000000   | 22.3000000  | 1409565    | 0                                                           | 1                   | 0             | 0              | 1           |
| valdivia   | cl      | Valdivian Lakes                                  | 0                 | -73.2333330  | -39.8000000 | 133420     | 0                                                           | 0                   | 0             | 0              | 0           |
| valencia   | es      | Eastern Iberia                                   | 13                | -0.3666670   | 39.4666670  | 769897     | 0                                                           | 0                   | 0             | 2              | 2           |
| valencia   | ve      | Orinoco Piedmont                                 | 10                | -68.0038889  | 10.1805556  | 1385202    | 0                                                           | 0                   | 0             | 2              | 2           |
| valladolid | es      | Western Iberia                                   | 6                 | -4.7237200   | 41.6551810  | 315859     | 0                                                           | 0                   | 0             | 2              | 2           |

Table S2 Cities and freshwater reptiles

| City             | Country | Freshwater Ecoregions of the World (FEOW) Region | Regional richness | Longitude    | Latitude    | Population | # of freshwater reptile species within 50 km of city centre |                     |               |                |             |
|------------------|---------|--------------------------------------------------|-------------------|--------------|-------------|------------|-------------------------------------------------------------|---------------------|---------------|----------------|-------------|
|                  |         |                                                  |                   |              |             |            | Lizard species                                              | Crocodilian species | Snake species | Turtle species | All species |
| valledupar       | co      | Magdalena - Sinu                                 | 15                | -73.2532240  | 10.4631400  | 308242     | 0                                                           | 0                   | 0             | 0              | 0           |
| vallejo          | us      | Sacramento - San Joaquin                         | 10                | -122.2555556 | 38.1041667  | 120446     | 0                                                           | 0                   | 0             | 6              | 6           |
| valparaiso       | cl      | South Andean Pacific Slopes                      | 0                 | -71.6011110  | -33.0477780 | 282450     | 0                                                           | 0                   | 0             | 0              | 0           |
| van              | tr      | Lake Van                                         | 2                 | 43.3831100   | 38.4923930  | 371911     | 0                                                           | 0                   | 0             | 1              | 1           |
| vanadzor         | am      | Kura - South Caspian Drainages                   | 4                 | 44.4883333   | 40.8127778  | 101099     | 0                                                           | 0                   | 0             | 0              | 0           |
| vancouver        | ca      | Alaska & Canada Pacific Coastal                  | 4                 | -123.1333330 | 49.2500000  | 1837970    | 0                                                           | 0                   | 0             | 2              | 2           |
| vancouver        | us      | Columbia Unglaciaded                             | 4                 | -122.6602778 | 45.6388889  | 157517     | 0                                                           | 0                   | 0             | 2              | 2           |
| vanderbijlpark   | za      | Southern Temperate Highveld                      | 5                 | 27.8379490   | -26.7117110 | 246821     | 1                                                           | 0                   | 0             | 1              | 2           |
| varamin          | ir      | Namak                                            | 3                 | 51.6457000   | 35.3242000  | 179620     | 0                                                           | 0                   | 0             | 0              | 0           |
| varanasi         | in      | Ganges Delta & Plain                             | 13                | 83.0000000   | 25.3333330  | 1164520    | 0                                                           | 0                   | 0             | 0              | 0           |
| varginha         | br      | Upper Parana                                     | 3                 | -45.4333330  | -21.5500000 | 116573     | 0                                                           | 0                   | 0             | 0              | 0           |
| varna            | bg      | Dniester - Lower Danube                          | 3                 | 27.9166667   | 43.2166667  | 307952     | 0                                                           | 0                   | 0             | 0              | 0           |
| varzea grande    | br      | Paraguay                                         | 8                 | -56.1333330  | -15.6500000 | 249766     | 0                                                           | 0                   | 0             | 0              | 0           |
| varzea paulista  | br      | Upper Parana                                     | 3                 | -46.8333330  | -23.2000000 | 110938     | 0                                                           | 0                   | 0             | 1              | 1           |
| vasteras         | se      | Northern Baltic Drainages                        | 2                 | 16.5500000   | 59.6166670  | 107194     | 0                                                           | 0                   | 0             | 0              | 0           |
| vejalpur         | in      | Namuda - Tapi                                    | 1                 | 73.5666670   | 22.6833330  | 121618     | 0                                                           | 0                   | 0             | 0              | 0           |
| velikie luki     | ru      | Southern Baltic Lowlands                         | 0                 | 30.5451700   | 56.3400000  | 103150     | 0                                                           | 0                   | 0             | 0              | 0           |
| velikiy novgorod | ru      | Southern Baltic Lowlands                         | 0                 | 31.2833330   | 58.5166670  | 215065     | 0                                                           | 0                   | 0             | 0              | 0           |
| velluru          | in      | Southeastern Ghats                               | 3                 | 79.1333330   | 12.9333330  | 177096     | 0                                                           | 0                   | 0             | 0              | 0           |
| venice           | it      | Gulf of Venice Drainages                         | 8                 | 12.3266670   | 45.4386110  | 259126     | 0                                                           | 0                   | 0             | 2              | 2           |
| veracruz         | mx      | Papaloapan                                       | 13                | -96.1333330  | 19.2000000  | 568336     | 1                                                           | 1                   | 0             | 2              | 4           |
| veraval          | in      | Namuda - Tapi                                    | 1                 | 70.3666670   | 20.9000000  | 163336     | 0                                                           | 1                   | 0             | 0              | 1           |
| vereeniging      | za      | Southern Temperate Highveld                      | 5                 | 27.9261470   | -26.6731330 | 474680     | 1                                                           | 0                   | 0             | 1              | 2           |
| verona           | it      | Gulf of Venice Drainages                         | 8                 | 11.0000000   | 45.4500000  | 247082     | 0                                                           | 0                   | 0             | 3              | 3           |

Table S2 Cities and freshwater reptiles

| City          | Country | Freshwater Ecoregions of the World (FEOW) Region | Regional richness | Longitude    | Latitude    | Population | # of freshwater reptile species within 50 km of city centre |                     |               |                |             |
|---------------|---------|--------------------------------------------------|-------------------|--------------|-------------|------------|-------------------------------------------------------------|---------------------|---------------|----------------|-------------|
|               |         |                                                  |                   |              |             |            | Lizard species                                              | Crocodilian species | Snake species | Turtle species | All species |
| verwoerdburg  | za      | Southern Temperate Highveld                      | 5                 | 28.1761020   | -25.8407950 | 233394     | 0                                                           | 1                   | 1             | 2              | 4           |
| viamao        | br      | Laguna dos Patos                                 | 2                 | -51.0333330  | -30.0833330 | 285274     | 0                                                           | 0                   | 0             | 0              | 0           |
| vicenza       | it      | Gulf of Venice Drainages                         | 8                 | 11.5500000   | 45.5500000  | 108636     | 0                                                           | 0                   | 0             | 2              | 2           |
| victoria      | ca      | Alaska & Canada Pacific Coastal                  | 4                 | -123.3500000 | 48.4333330  | 289625     | 0                                                           | 0                   | 0             | 2              | 2           |
| vidisha       | in      | Ganges Delta & Plain                             | 13                | 77.8166670   | 23.5333330  | 140059     | 0                                                           | 0                   | 0             | 0              | 0           |
| vienna        | at      | Upper Danube                                     | 5                 | 16.3666670   | 48.2000000  | 1569315    | 0                                                           | 0                   | 0             | 1              | 1           |
| vientiane     | la      | Khorat Plateau (Mekong)                          | 5                 | 102.6000000  | 17.9666670  | 196644     | 0                                                           | 0                   | 0             | 0              | 0           |
| vigo          | es      | Cantabric Coast - Languedoc                      | 10                | -8.7226370   | 42.2328230  | 286585     | 0                                                           | 0                   | 0             | 3              | 3           |
| vihari        | pk      | Lower & Middle Indus                             | 2                 | 72.3500000   | 30.0333330  | 112873     | 0                                                           | 0                   | 0             | 0              | 0           |
| vijayawada    | in      | Southern Deccan Plateau                          | 0                 | 80.6166670   | 16.5166670  | 874684     | 0                                                           | 0                   | 0             | 0              | 0           |
| vila velha    | br      | Northeastern Mata Atlantica                      | 1                 | -40.2833330  | -20.3333330 | 394937     | 0                                                           | 0                   | 0             | 0              | 0           |
| villa canales | gt      | Chiapas - Fonseca                                | 11                | -90.5316670  | 14.4813890  | 119084     | 1                                                           | 0                   | 0             | 1              | 2           |
| villa nueva   | gt      | Chiapas - Fonseca                                | 11                | -90.5875000  | 14.5269440  | 397158     | 1                                                           | 0                   | 0             | 1              | 2           |
| villahermosa  | mx      | Grijalva - Usumacinta                            | 18                | -92.9166670  | 17.9833330  | 362416     | 1                                                           | 2                   | 0             | 5              | 8           |
| villavicencio | co      | Orinoco Piedmont                                 | 10                | -73.6266450  | 4.1420020   | 321721     | 0                                                           | 1                   | 1             | 3              | 5           |
| villeurbanne  | fr      | Central & Western Europe                         | 13                | 4.8755220    | 45.7655020  | 126230     | 0                                                           | 0                   | 0             | 2              | 2           |
| vilnius       | lt      | Central & Western Europe                         | 13                | 25.3166667   | 54.6833333  | 542381     | 0                                                           | 0                   | 0             | 0              | 0           |
| vina del mar  | cl      | South Andean Pacific Slopes                      | 0                 | -71.5197220  | -33.0080560 | 294553     | 0                                                           | 0                   | 0             | 0              | 0           |
| vinh          | vn      | Northern Annam                                   | 0                 | 105.6666670  | 18.6666670  | 107130     | 0                                                           | 0                   | 0             | 0              | 0           |
| vinh long     | vn      | Mekong Delta                                     | 3                 | 105.9666670  | 10.2500000  | 103323     | 0                                                           | 0                   | 0             | 0              | 0           |
| vinnitsa      | ua      | Dnieper - South Bug                              | 2                 | 28.4809680   | 49.2327760  | 332400     | 0                                                           | 0                   | 0             | 0              | 0           |
| vinnytsya     | ua      | Dnieper - South Bug                              | 2                 | 28.4809680   | 49.2327760  | 352113     | 0                                                           | 0                   | 0             | 0              | 0           |
| viransehir    | tr      | Lower Tigris & Euphrates                         | 1                 | 39.7630560   | 37.2352780  | 154244     | 0                                                           | 0                   | 0             | 0              | 0           |
| virar         | in      | Western Ghats                                    | 4                 | 72.8000000   | 19.4666670  | 150419     | 0                                                           | 0                   | 0             | 0              | 0           |
| virginia      | za      | Southern Temperate Highveld                      | 5                 | 26.8659300   | -28.1039100 | 122542     | 0                                                           | 0                   | 0             | 0              | 0           |

Table S2 Cities and freshwater reptiles

| City                   | Country | Freshwater Ecoregions of the World (FEOW) Region | Regional richness | Longitude   | Latitude    | Population | # of freshwater reptile species within 50 km of city centre |                     |               |                |             |
|------------------------|---------|--------------------------------------------------|-------------------|-------------|-------------|------------|-------------------------------------------------------------|---------------------|---------------|----------------|-------------|
|                        |         |                                                  |                   |             |             |            | Lizard species                                              | Crocodilian species | Snake species | Turtle species | All species |
| virginia beach         | us      | Appalachian Piedmont                             | 26                | -75.9783333 | 36.8527778  | 449386     | 0                                                           | 0                   | 1             | 10             | 11          |
| visakhapatnam          | in      | Northern Deccan Plateau                          | 2                 | 83.3000000  | 17.7000000  | 1063293    | 0                                                           | 0                   | 0             | 0              | 0           |
| visalia                | us      | Sacramento - San Joaquin                         | 10                | -           | 36.3302778  | 107431     | 0                                                           | 0                   | 0             | 2              | 2           |
| vitoria                | es      | Eastern Iberia                                   | 13                | -2.6666670  | 42.8500000  | 224774     | 0                                                           | 0                   | 0             | 3              | 3           |
| vitoria                | br      | Northeastern Mata Atlantica                      | 1                 | -40.3500000 | -20.3166670 | 312662     | 0                                                           | 0                   | 0             | 3              | 3           |
| vitoria da conquista   | br      | Northeastern Mata Atlantica                      | 1                 | -40.8500000 | -14.8500000 | 253144     | 0                                                           | 0                   | 0             | 0              | 0           |
| vitoria de santo antao | br      | Northeastern Caatinga & Coastal Drainages        | 1                 | -35.3000000 | -8.1166670  | 107385     | 0                                                           | 0                   | 0             | 0              | 0           |
| vizianagaram           | in      | Northern Deccan Plateau                          | 2                 | 83.4166670  | 18.1166670  | 179379     | 0                                                           | 0                   | 0             | 0              | 0           |
| vladikavkaz            | ru      | Western Caspian Drainages                        | 0                 | 44.6677780  | 43.0366670  | 317372     | 0                                                           | 0                   | 0             | 0              | 0           |
| vladimir               | ru      | Volga - Ural                                     | 0                 | 40.3965760  | 56.1365470  | 310027     | 0                                                           | 0                   | 0             | 0              | 0           |
| vladivostok            | ru      | Sakhalin, Hokkaido, & Sikhote - Alin Coast       | 0                 | 131.9011110 | 43.1280560  | 587029     | 0                                                           | 0                   | 0             | 0              | 0           |
| volgodonsk             | ru      | Don                                              | 1                 | 42.2350000  | 47.5026000  | 167734     | 0                                                           | 0                   | 0             | 0              | 0           |
| volgograd              | ru      | Volga - Ural                                     | 0                 | 44.5018350  | 48.7193900  | 1010331    | 0                                                           | 0                   | 0             | 0              | 0           |
| vologda                | ru      | Barents Sea Drainages                            | 0                 | 39.8886000  | 59.2187000  | 294892     | 0                                                           | 0                   | 0             | 0              | 0           |
| volta redonda          | br      | Paraiba do Sul                                   | 0                 | -44.1166670 | -22.5333330 | 249584     | 0                                                           | 0                   | 0             | 0              | 0           |
| volzhskiy              | ru      | Volga - Ural                                     | 0                 | 44.7797300  | 48.7858320  | 323298     | 0                                                           | 0                   | 0             | 0              | 0           |
| voronezh               | ru      | Don                                              | 1                 | 39.1843010  | 51.6720350  | 840590     | 0                                                           | 0                   | 0             | 0              | 0           |
| vryheid                | za      | Southern Temperate Highveld                      | 5                 | 30.7916530  | -27.7695200 | 150079     | 0                                                           | 0                   | 0             | 1              | 1           |
| vung tau               | vn      | Southern Annam                                   | 2                 | 107.0666670 | 10.3500000  | 209699     | 0                                                           | 0                   | 0             | 0              | 0           |
| waco                   | us      | East Texas Gulf                                  | 34                | -97.1463889 | 31.5491667  | 118967     | 0                                                           | 0                   | 0             | 5              | 5           |
| wad madani             | sd      | Lower Nile                                       | 1                 | 33.5333333  | 14.4000000  | 332752     | 0                                                           | 0                   | 0             | 0              | 0           |
| wah                    | pk      | Lower & Middle Indus                             | 2                 | 72.6957030  | 33.7979950  | 237584     | 0                                                           | 0                   | 0             | 0              | 0           |
| wahran                 | dz      | Mediterranean Northwest Africa                   | 2                 | -0.6416667  | 35.6911111  | 646025     | 0                                                           | 0                   | 0             | 0              | 0           |
| waitakere              | nz      | New Zealand                                      | 2                 | 174.5500000 | -36.8500000 | 166237     | 0                                                           | 0                   | 0             | 1              | 1           |

Table S2 Cities and freshwater reptiles

| City          | Country | Freshwater Ecoregions of the World (FEOW) Region   | Regional richness | Longitude   | Latitude    | Population | # of freshwater reptile species within 50 km of city centre |                     |               |                |             |
|---------------|---------|----------------------------------------------------|-------------------|-------------|-------------|------------|-------------------------------------------------------------|---------------------|---------------|----------------|-------------|
|               |         |                                                    |                   |             |             |            | Lizard species                                              | Crocodilian species | Snake species | Turtle species | All species |
| walbrzych     | pl      | Central & Western Europe                           | 13                | 16.2843200  | 50.7714070  | 127431     | 0                                                           | 0                   | 0             | 1              | 1           |
| walsall       | gb      | Central & Western Europe                           | 13                | -2.0000000  | 52.6000000  | 172142     | 0                                                           | 0                   | 0             | 1              | 1           |
| wanxian       | cn      | Middle Yangtze                                     | 1                 | 108.3897220 | 30.8038890  | 188980     | 0                                                           | 0                   | 0             | 0              | 0           |
| warangal      | in      | Northern Deccan Plateau                            | 2                 | 79.5833330  | 18.0000000  | 557864     | 0                                                           | 0                   | 0             | 0              | 0           |
| wardha        | in      | Northern Deccan Plateau                            | 2                 | 78.6166670  | 20.7500000  | 113768     | 0                                                           | 0                   | 0             | 0              | 0           |
| warqia        | dz      | Sahara                                             | 1                 | 5.3277778   | 31.9575000  | 150611     | 0                                                           | 0                   | 0             | 0              | 0           |
| warren        | us      | Laurentian Great Lakes                             | 16                | -83.0277778 | 42.4775000  | 133517     | 0                                                           | 0                   | 0             | 7              | 7           |
| warri         | ng      | Niger Delta                                        | 0                 | 5.7500000   | 5.5166670   | 536068     | 0                                                           | 0                   | 0             | 0              | 0           |
| warsaw        | pl      | Central & Western Europe                           | 13                | 21.0000000  | 52.2500000  | 1651676    | 0                                                           | 0                   | 0             | 1              | 1           |
| waru          | id      | Central & Eastern Java                             | 4                 | 112.7247220 | -7.3600000  | 147506     | 0                                                           | 0                   | 0             | 0              | 0           |
| washington    | us      | Chesapeake Bay                                     | 19                | -77.0366667 | 38.8950000  | 552433     | 0                                                           | 0                   | 0             | 13             | 13          |
| waterbury     | us      | Northeast US & Southeast Canada Atlantic Drainages | 18                | -73.0519444 | 41.5580556  | 108507     | 0                                                           | 0                   | 0             | 8              | 8           |
| waterloo      | ca      | Laurentian Great Lakes                             | 16                | -80.5333330 | 43.4666670  | 110800     | 0                                                           | 0                   | 0             | 5              | 5           |
| watford       | gb      | Central & Western Europe                           | 13                | -0.4000000  | 51.6666670  | 125708     | 0                                                           | 0                   | 0             | 2              | 2           |
| waw           | sd      | Upper Nile                                         | 2                 | 28.0000000  | 7.7000000   | 127400     | 0                                                           | 0                   | 0             | 0              | 0           |
| wazirabad     | pk      | Lower & Middle Indus                               | 2                 | 74.1159440  | 32.4458310  | 102474     | 0                                                           | 0                   | 0             | 0              | 0           |
| weifang       | cn      | Lower Huang He                                     | 0                 | 119.1019440 | 36.7100000  | 394732     | 0                                                           | 0                   | 0             | 0              | 0           |
| weihai        | cn      | Lower Huang He                                     | 0                 | 122.1136110 | 37.5016670  | 152595     | 0                                                           | 0                   | 0             | 0              | 0           |
| weinan        | cn      | Lower Huang He                                     | 0                 | 109.5089080 | 34.5035460  | 172321     | 0                                                           | 0                   | 0             | 0              | 0           |
| welkom        | za      | Southern Temperate Highveld                        | 5                 | 26.7066120  | -27.9864420 | 432070     | 0                                                           | 0                   | 0             | 0              | 0           |
| wellington    | nz      | New Zealand                                        | 2                 | 174.7833330 | -41.3000000 | 179240     | 0                                                           | 0                   | 0             | 0              | 0           |
| wencheng      | cn      | Lower Huang He                                     | 0                 | 122.0511110 | 37.1936110  | 115370     | 0                                                           | 0                   | 0             | 0              | 0           |
| wenzhou       | cn      | Coastal Fujian - Zeijang                           | 1                 | 120.6668200 | 27.9994160  | 865672     | 0                                                           | 0                   | 0             | 0              | 0           |
| weru          | id      | Southern Sumatra - Western Java                    | 8                 | 108.5037000 | -6.7110000  | 139013     | 0                                                           | 0                   | 0             | 0              | 0           |
| west bromwich | gb      | Central & Western Europe                           | 13                | -2.0000000  | 52.5166670  | 135618     | 0                                                           | 0                   | 0             | 1              | 1           |

Table S2 Cities and freshwater reptiles

| City             | Country | Freshwater Ecoregions of the World (FEOW) Region   | Regional richness | Longitude    | Latitude    | Population | # of freshwater reptile species within 50 km of city centre |                     |               |                |             |
|------------------|---------|----------------------------------------------------|-------------------|--------------|-------------|------------|-------------------------------------------------------------|---------------------|---------------|----------------|-------------|
|                  |         |                                                    |                   |              |             |            | Lizard species                                              | Crocodilian species | Snake species | Turtle species | All species |
| west covina      | us      | Southern California Coastal - Baja California      | 12                | -117.9380556 | 34.0686111  | 109756     | 0                                                           | 0                   | 0             | 8              | 8           |
| west jordan      | us      | Bonneville                                         | 1                 | -111.9383333 | 40.6097222  | 101031     | 0                                                           | 0                   | 0             | 1              | 1           |
| west valley city | us      | Bonneville                                         | 1                 | -112.0002778 | 40.6916667  | 113112     | 0                                                           | 0                   | 0             | 1              | 1           |
| westminster      | us      | Middle Missouri                                    | 12                | -105.0366667 | 39.8366667  | 104037     | 0                                                           | 0                   | 0             | 5              | 5           |
| westonaria       | za      | Southern Temperate Highveld                        | 5                 | 27.6486050   | -26.3190550 | 156831     | 0                                                           | 1                   | 1             | 1              | 3           |
| wichita          | us      | US Southern Plains                                 | 20                | -97.3372222  | 37.6922222  | 355244     | 0                                                           | 0                   | 0             | 8              | 8           |
| wichita falls    | us      | US Southern Plains                                 | 20                | -98.4930556  | 33.9136111  | 101212     | 0                                                           | 0                   | 0             | 6              | 6           |
| wiesbaden        | de      | Central & Western Europe                           | 13                | 8.2500000    | 50.0833330  | 272337     | 0                                                           | 0                   | 0             | 5              | 5           |
| windhoek         | na      | Namib                                              | 3                 | 17.0836111   | -22.5700000 | 268129     | 1                                                           | 1                   | 0             | 0              | 2           |
| windsor          | ca      | Laurentian Great Lakes                             | 16                | -83.0333330  | 42.3333330  | 278013     | 0                                                           | 0                   | 0             | 7              | 7           |
| winnipeg         | ca      | English - Winnipeg Lakes                           | 3                 | -97.1666670  | 49.8833330  | 632069     | 0                                                           | 0                   | 0             | 3              | 3           |
| winston-salem    | us      | Appalachian Piedmont                               | 26                | -80.2444444  | 36.0997222  | 193300     | 0                                                           | 0                   | 0             | 7              | 7           |
| witbank          | za      | Southern Temperate Highveld                        | 5                 | 29.2332340   | -25.8713310 | 262514     | 1                                                           | 1                   | 1             | 0              | 3           |
| witten           | de      | Central & Western Europe                           | 13                | 7.3333330    | 51.4333330  | 101122     | 0                                                           | 0                   | 0             | 2              | 2           |
| wloclawek        | pl      | Central & Western Europe                           | 13                | 19.0727550   | 52.6514350  | 120339     | 0                                                           | 0                   | 0             | 1              | 1           |
| wolfsburg        | de      | Central & Western Europe                           | 13                | 10.8000000   | 52.4333330  | 123184     | 0                                                           | 0                   | 0             | 1              | 1           |
| wollongong       | au      | Eastern Coastal Australia                          | 19                | 150.8934480  | -34.4240000 | 260918     | 3                                                           | 0                   | 3             | 3              | 9           |
| wolverhampton    | gb      | Central & Western Europe                           | 13                | -2.1333330   | 52.5833330  | 252792     | 0                                                           | 0                   | 0             | 1              | 1           |
| worcester        | za      | Cape Fold                                          | 3                 | 19.4485230   | -33.6465100 | 127604     | 0                                                           | 0                   | 0             | 8              | 8           |
| worcester        | gb      | Central & Western Europe                           | 13                | -2.1666670   | 52.1666670  | 100023     | 0                                                           | 0                   | 0             | 8              | 8           |
| worcester        | us      | Northeast US & Southeast Canada Atlantic Drainages | 18                | -71.8027778  | 42.2625000  | 177216     | 0                                                           | 0                   | 0             | 8              | 8           |
| wroclaw          | pl      | Central & Western Europe                           | 13                | 17.0333330   | 51.1000000  | 634893     | 0                                                           | 0                   | 0             | 1              | 1           |
| wuda             | cn      | Huang He Great Bend                                | 0                 | 106.7116670  | 39.4994440  | 129922     | 0                                                           | 0                   | 0             | 0              | 0           |
| wufeng           | cn      | Middle Yangtze                                     | 1                 | 104.8333330  | 27.4500000  | 101728     | 0                                                           | 0                   | 0             | 0              | 0           |

Table S2 Cities and freshwater reptiles

| City       | Country | Freshwater Ecoregions of the World (FEOW) Region | Regional richness | Longitude   | Latitude    | Population | # of freshwater reptile species within 50 km of city centre |                     |               |                |             |
|------------|---------|--------------------------------------------------|-------------------|-------------|-------------|------------|-------------------------------------------------------------|---------------------|---------------|----------------|-------------|
|            |         |                                                  |                   |             |             |            | Lizard species                                              | Crocodilian species | Snake species | Turtle species | All species |
| wuhan      | cn      | Lower Yangtze                                    | 4                 | 114.2734050 | 30.5801250  | 4184206    | 0                                                           | 0                   | 0             | 0              | 0           |
| wuhu       | cn      | Lower Yangtze                                    | 4                 | 118.5706900 | 31.1460700  | 507524     | 0                                                           | 0                   | 0             | 0              | 0           |
| wulanhaote | cn      | Songhua Jiang                                    | 0                 | 122.0833330 | 46.0833330  | 165846     | 0                                                           | 0                   | 0             | 0              | 0           |
| wuning     | cn      | Lower Yangtze                                    | 4                 | 120.2310830 | 29.2588730  | 130387     | 0                                                           | 0                   | 0             | 1              | 1           |
| wuppertal  | de      | Central & Western Europe                         | 13                | 7.1833330   | 51.2666670  | 363240     | 0                                                           | 0                   | 0             | 3              | 3           |
| wurzburg   | de      | Central & Western Europe                         | 13                | 9.9361110   | 49.7877780  | 134499     | 0                                                           | 0                   | 0             | 1              | 1           |
| wuwei      | cn      | Inner Mongolia Endorheic Basins                  | 0                 | 102.6413890 | 37.9280560  | 109319     | 0                                                           | 0                   | 0             | 0              | 0           |
| wuxi       | cn      | Lower Yangtze                                    | 4                 | 120.2885730 | 31.5688730  | 1108647    | 0                                                           | 0                   | 0             | 0              | 0           |
| wuxue      | cn      | Lower Yangtze                                    | 4                 | 115.5525040 | 29.8505780  | 220661     | 0                                                           | 0                   | 0             | 0              | 0           |
| wuzhou     | cn      | Xi Yang                                          | 15                | 111.3166670 | 23.4833330  | 265846     | 0                                                           | 0                   | 0             | 0              | 0           |
| xai-xai    | mz      | Zambezian Lowveld                                | 10                | 33.6441667  | -25.0519444 | 127366     | 0                                                           | 0                   | 0             | 0              | 0           |
| xalapa     | mx      | Papaloapan                                       | 13                | -96.9166670 | 19.5333330  | 425166     | 0                                                           | 1                   | 0             | 6              | 7           |
| xiamen     | cn      | Coastal Fujian - Zeijang                         | 1                 | 118.0818690 | 24.4797940  | 578337     | 0                                                           | 0                   | 0             | 1              | 1           |
| xian       | cn      | Lower Huang He                                   | 0                 | 108.9286110 | 34.2583330  | 3953191    | 0                                                           | 0                   | 0             | 0              | 0           |
| xiangdong  | cn      | Lower Yangtze                                    | 4                 | 113.7000000 | 27.7000000  | 103815     | 0                                                           | 0                   | 0             | 0              | 0           |
| xiangfan   | cn      | Lower Yangtze                                    | 4                 | 112.1447940 | 32.0422030  | 462956     | 0                                                           | 0                   | 0             | 0              | 0           |
| xiantao    | cn      | Lower Yangtze                                    | 4                 | 113.4000000 | 30.3833330  | 239406     | 0                                                           | 0                   | 0             | 0              | 0           |
| xianyang   | cn      | Lower Huang He                                   | 0                 | 108.7026100 | 34.3377800  | 1034081    | 0                                                           | 0                   | 0             | 0              | 0           |
| xiaolan    | cn      | Xi Yang                                          | 15                | 113.2318740 | 22.6738110  | 187865     | 0                                                           | 0                   | 0             | 0              | 0           |
| xiazhen    | cn      | Lower Yangtze                                    | 4                 | 117.1116670 | 34.8022220  | 125667     | 0                                                           | 0                   | 0             | 0              | 0           |
| xichang    | cn      | Middle Yangtze                                   | 1                 | 102.2634150 | 27.8964220  | 126787     | 0                                                           | 0                   | 0             | 0              | 0           |
| xico       | mx      | Lerma - Chapala                                  | 10                | -98.9333330 | 19.2666670  | 365793     | 0                                                           | 0                   | 0             | 5              | 5           |
| xingtai    | cn      | Lower Huang He                                   | 0                 | 114.4941670 | 37.0630560  | 611739     | 0                                                           | 0                   | 0             | 0              | 0           |
| xingyi     | cn      | Xi Yang                                          | 15                | 104.9833330 | 25.0500000  | 119000     | 0                                                           | 0                   | 0             | 0              | 0           |
| xining     | cn      | Upper Huang He Corridor                          | 0                 | 101.7666670 | 36.6166670  | 767531     | 0                                                           | 0                   | 0             | 0              | 0           |

Table S2 Cities and freshwater reptiles

| City         | Country | Freshwater Ecoregions of the World (FEOW) Region | Regional richness | Longitude   | Latitude   | Population | # of freshwater reptile species within 50 km of city centre |                     |               |                |             |
|--------------|---------|--------------------------------------------------|-------------------|-------------|------------|------------|-------------------------------------------------------------|---------------------|---------------|----------------|-------------|
|              |         |                                                  |                   |             |            |            | Lizard species                                              | Crocodilian species | Snake species | Turtle species | All species |
| xinpu        | cn      | Lower Yangtze                                    | 4                 | 119.1594440 | 34.5997220 | 392444     | 0                                                           | 0                   | 0             | 0              | 0           |
| xintai       | cn      | Lower Huang He                                   | 0                 | 117.7519440 | 35.9005560 | 222459     | 0                                                           | 0                   | 0             | 0              | 0           |
| xinxiang     | cn      | Lower Huang He                                   | 0                 | 113.8672220 | 35.3088890 | 743601     | 0                                                           | 0                   | 0             | 0              | 0           |
| xinyang      | cn      | Lower Yangtze                                    | 4                 | 114.1202780 | 32.0958330 | 1590668    | 0                                                           | 0                   | 0             | 0              | 0           |
| xinzhou      | cn      | Lower Huang He                                   | 0                 | 112.7333330 | 38.4091670 | 154003     | 0                                                           | 0                   | 0             | 0              | 0           |
| xuanhua      | cn      | Lower Huang He                                   | 0                 | 115.0447220 | 40.6102780 | 373422     | 0                                                           | 0                   | 0             | 0              | 0           |
| xuanzhou     | cn      | Lower Yangtze                                    | 4                 | 118.7552780 | 30.9525000 | 127758     | 0                                                           | 0                   | 0             | 0              | 0           |
| xuchang      | cn      | Lower Yangtze                                    | 4                 | 113.8166670 | 34.0166670 | 449258     | 0                                                           | 0                   | 0             | 0              | 0           |
| xuzhou       | cn      | Lower Yangtze                                    | 4                 | 117.1570700 | 34.1804540 | 1199193    | 0                                                           | 0                   | 0             | 0              | 0           |
| yaan         | cn      | Middle Yangtze                                   | 1                 | 103.0036940 | 29.9897880 | 108758     | 0                                                           | 0                   | 0             | 0              | 0           |
| yachiyo      | jp      | Honshu - Shikoku - Kyushu                        | 5                 | 140.1244530 | 35.7353060 | 182894     | 0                                                           | 0                   | 0             | 3              | 3           |
| yaizu        | jp      | Honshu - Shikoku - Kyushu                        | 5                 | 138.3333330 | 34.8666670 | 121059     | 0                                                           | 0                   | 0             | 0              | 0           |
| yakeshi      | cn      | Argun                                            | 0                 | 120.7333330 | 49.2833330 | 116284     | 0                                                           | 0                   | 0             | 0              | 0           |
| yamoussoukro | ci      | Eburneo                                          | 0                 | -5.2767410  | 6.8205480  | 200659     | 0                                                           | 0                   | 0             | 0              | 0           |
| yamunanagar  | in      | Ganges Delta & Plain                             | 13                | 77.2833330  | 30.1000000 | 208945     | 0                                                           | 0                   | 0             | 0              | 0           |
| yanan        | cn      | Lower Huang He                                   | 0                 | 109.4916670 | 36.5988890 | 107960     | 0                                                           | 0                   | 0             | 0              | 0           |
| yancheng     | cn      | Lower Yangtze                                    | 4                 | 120.1252780 | 33.3855560 | 628441     | 0                                                           | 0                   | 0             | 0              | 0           |
| yangjiang    | cn      | Xi Yang                                          | 15                | 111.9666670 | 21.8500000 | 399735     | 0                                                           | 0                   | 0             | 0              | 0           |
| yangmei      | tw      | Western Taiwan                                   | 2                 | 121.1333333 | 24.9166667 | 149768     | 0                                                           | 0                   | 0             | 2              | 2           |
| yangzhou     | cn      | Lower Yangtze                                    | 4                 | 119.4358330 | 32.3972220 | 539715     | 0                                                           | 0                   | 0             | 0              | 0           |
| yanji        | cn      | Hamgyong - Sanmaek                               | 0                 | 129.4233330 | 42.7713890 | 326957     | 0                                                           | 0                   | 0             | 0              | 0           |
| yantai       | cn      | Lower Huang He                                   | 0                 | 121.4000000 | 37.5333330 | 719332     | 0                                                           | 0                   | 0             | 0              | 0           |
| yao          | jp      | Honshu - Shikoku - Kyushu                        | 5                 | 135.6000000 | 34.6166670 | 273216     | 0                                                           | 0                   | 0             | 2              | 2           |
| yaounde      | cm      | Southern Gulf of Guinea Drainages                | 4                 | 11.5166667  | 3.8666667  | 1299446    | 0                                                           | 0                   | 1             | 0              | 1           |
| yaroslavl    | ru      | Volga - Ural                                     | 0                 | 39.8553600  | 57.6197700 | 606735     | 0                                                           | 0                   | 0             | 0              | 0           |

Table S2 Cities and freshwater reptiles

| City          | Country | Freshwater Ecoregions of the World (FEOW) Region | Regional richness | Longitude   | Latitude   | Population | # of freshwater reptile species within 50 km of city centre |                     |               |                |             |
|---------------|---------|--------------------------------------------------|-------------------|-------------|------------|------------|-------------------------------------------------------------|---------------------|---------------|----------------|-------------|
|               |         |                                                  |                   |             |            |            | Lizard species                                              | Crocodilian species | Snake species | Turtle species | All species |
| yatsushiro    | jp      | Honshu - Shikoku - Kyushu                        | 5                 | 130.6000000 | 32.5000000 | 104343     | 0                                                           | 0                   | 0             | 0              | 0           |
| yavatmal      | in      | Northern Deccan Plateau                          | 2                 | 78.1333330  | 20.4000000 | 128185     | 0                                                           | 0                   | 0             | 0              | 0           |
| yazd          | ir      | Kavir & Lut Deserts                              | 0                 | 54.3675000  | 31.8972220 | 477926     | 0                                                           | 0                   | 0             | 0              | 0           |
| yekaterinburg | ru      | Ob                                               | 0                 | 60.6122000  | 56.8519000 | 1287586    | 0                                                           | 0                   | 0             | 0              | 0           |
| yelahanka     | in      | Southeastern Ghats                               | 3                 | 77.6002780  | 13.1075000 | 116457     | 0                                                           | 0                   | 0             | 0              | 0           |
| yelets        | ru      | Don                                              | 1                 | 38.5016860  | 52.6236590 | 115690     | 0                                                           | 0                   | 0             | 0              | 0           |
| yenangyaung   | mm      | Sitang - Irawaddy                                | 0                 | 94.8833333  | 20.4666667 | 110567     | 0                                                           | 0                   | 0             | 0              | 0           |
| yerevan       | am      | Kura - South Caspian Drainages                   | 4                 | 44.5136111  | 40.1811111 | 1093499    | 0                                                           | 0                   | 0             | 0              | 0           |
| yevpatoriya   | ua      | Crimea Peninsula                                 | 0                 | 33.3665460  | 45.2009080 | 105222     | 0                                                           | 0                   | 0             | 0              | 0           |
| yibin         | cn      | Middle Yangtze                                   | 1                 | 104.5491730 | 28.6997020 | 242111     | 0                                                           | 0                   | 0             | 0              | 0           |
| yichang       | cn      | Middle Yangtze                                   | 1                 | 111.3214580 | 30.7713500 | 476725     | 0                                                           | 0                   | 0             | 0              | 0           |
| yichun        | cn      | Lower Yangtze                                    | 4                 | 114.4000000 | 27.8333330 | 152169     | 0                                                           | 0                   | 0             | 0              | 0           |
| yichun        | cn      | Songhua Jiang                                    | 0                 | 128.9000000 | 47.7000000 | 155762     | 0                                                           | 0                   | 0             | 0              | 0           |
| yidu          | cn      | Lower Huang He                                   | 0                 | 118.4797220 | 36.6966670 | 117056     | 0                                                           | 0                   | 0             | 0              | 0           |
| yinchuan      | cn      | Huang He Great Bend                              | 0                 | 106.2730560 | 38.4680560 | 475101     | 0                                                           | 0                   | 0             | 0              | 0           |
| yingcheng     | cn      | Lower Yangtze                                    | 4                 | 113.5500000 | 30.9500000 | 265886     | 0                                                           | 0                   | 0             | 0              | 0           |
| yingcheng     | cn      | Xi Yang                                          | 15                | 113.4126750 | 24.1658760 | 115538     | 0                                                           | 0                   | 0             | 0              | 0           |
| yingkou       | cn      | Liao He                                          | 0                 | 122.5025080 | 40.6373180 | 591159     | 0                                                           | 0                   | 0             | 0              | 0           |
| yingzhong     | cn      | Lower Yangtze                                    | 4                 | 112.5830560 | 31.1661110 | 108883     | 0                                                           | 0                   | 0             | 0              | 0           |
| yining        | cn      | Balkash - Alakul                                 | 0                 | 81.2458330  | 43.8811110 | 257671     | 0                                                           | 0                   | 0             | 0              | 0           |
| yyang         | cn      | Lower Yangtze                                    | 4                 | 112.3283330 | 28.5891670 | 202608     | 0                                                           | 0                   | 0             | 0              | 0           |
| yizheng       | cn      | Lower Yangtze                                    | 4                 | 119.1788890 | 32.2691670 | 176006     | 0                                                           | 0                   | 0             | 1              | 1           |
| yogyakarta    | id      | Indian Ocean Slope of Sumatra & Java             | 9                 | 110.3608330 | -7.7827780 | 636711     | 0                                                           | 0                   | 0             | 0              | 0           |
| yokkaichi     | jp      | Honshu - Shikoku - Kyushu                        | 5                 | 136.6166670 | 34.9666670 | 295843     | 0                                                           | 0                   | 0             | 0              | 0           |
| yokosuka      | jp      | Honshu - Shikoku - Kyushu                        | 5                 | 139.6672220 | 35.2836110 | 428999     | 0                                                           | 0                   | 0             | 3              | 3           |

Table S2 Cities and freshwater reptiles

| City      | Country | Freshwater Ecoregions of the World (FEOW) Region   | Regional richness | Longitude    | Latitude   | Population | # of freshwater reptile species within 50 km of city centre |                     |               |                |             |
|-----------|---------|----------------------------------------------------|-------------------|--------------|------------|------------|-------------------------------------------------------------|---------------------|---------------|----------------|-------------|
|           |         |                                                    |                   |              |            |            | Lizard species                                              | Crocodilian species | Snake species | Turtle species | All species |
| yonago    | jp      | Honshu - Shikoku - Kyushu                          | 5                 | 133.3333330  | 35.4333330 | 141369     | 0                                                           | 0                   | 0             | 0              | 0           |
| yongan    | cn      | Coastal Fujian - Zeijang                           | 1                 | 117.3641670  | 25.9800000 | 134858     | 0                                                           | 0                   | 0             | 0              | 0           |
| yonkers   | us      | Northeast US & Southeast Canada Atlantic Drainages | 18                | -73.8991667  | 40.9311111 | 197818     | 0                                                           | 0                   | 0             | 11             | 11          |
| york      | gb      | Central & Western Europe                           | 13                | -1.0642620   | 53.9541150 | 144202     | 0                                                           | 0                   | 0             | 0              | 0           |
| yuanlin   | tw      | Western Taiwan                                     | 2                 | 120.5733333  | 23.9575000 | 127650     | 0                                                           | 0                   | 0             | 2              | 2           |
| yuci      | cn      | Lower Huang He                                     | 0                 | 112.7319440  | 37.6802780 | 235929     | 0                                                           | 0                   | 0             | 0              | 0           |
| yueyang   | cn      | Lower Yangtze                                      | 4                 | 113.1111110  | 29.1408330 | 528140     | 0                                                           | 0                   | 0             | 0              | 0           |
| yulin     | cn      | Xi Yang                                            | 15                | 110.1500000  | 22.6333330 | 148485     | 0                                                           | 0                   | 0             | 0              | 0           |
| yuncheng  | cn      | Lower Huang He                                     | 0                 | 110.9927780  | 35.0230560 | 201950     | 0                                                           | 0                   | 0             | 0              | 0           |
| yungho    | tw      | Western Taiwan                                     | 2                 | 121.4961111  | 25.0000000 | 207852     | 0                                                           | 0                   | 0             | 2              | 2           |
| yungkang  | tw      | Eastern Taiwan                                     | 0                 | 121.1000000  | 22.9333333 | 240214     | 0                                                           | 0                   | 0             | 0              | 0           |
| yushan    | cn      | Lower Yangtze                                      | 4                 | 120.9543050  | 31.3776230 | 140039     | 0                                                           | 0                   | 0             | 0              | 0           |
| yushu     | cn      | Songhua Jiang                                      | 0                 | 126.5333330  | 44.8000000 | 124736     | 0                                                           | 0                   | 0             | 0              | 0           |
| yuyao     | cn      | Lower Yangtze                                      | 4                 | 121.1494440  | 30.0500000 | 114177     | 0                                                           | 0                   | 0             | 0              | 0           |
| zaanstad  | nl      | Central & Western Europe                           | 13                | 4.8333330    | 52.4500000 | 141800     | 0                                                           | 0                   | 0             | 0              | 0           |
| zabol     | ir      | Helmand - Sistan                                   | 0                 | 61.5012000   | 31.0287000 | 121999     | 0                                                           | 0                   | 0             | 0              | 0           |
| zabrze    | pl      | Central & Western Europe                           | 13                | 18.7833330   | 50.3063550 | 192177     | 0                                                           | 0                   | 0             | 1              | 1           |
| zacatecas | mx      | Llanos El Salado                                   | 6                 | -102.5833330 | 22.7833330 | 118566     | 0                                                           | 0                   | 0             | 0              | 0           |
| zagreb    | hr      | Dniester - Lower Danube                            | 3                 | 16.0000000   | 45.8000000 | 698967     | 0                                                           | 0                   | 0             | 1              | 1           |
| zalandun  | cn      | Songhua Jiang                                      | 0                 | 122.7166670  | 48.0000000 | 132224     | 0                                                           | 0                   | 0             | 0              | 0           |
| zama      | jp      | Honshu - Shikoku - Kyushu                          | 5                 | 139.3886110  | 35.4888890 | 134674     | 0                                                           | 0                   | 0             | 3              | 3           |
| zamboanga | ph      | Mindanao                                           | 1                 | 122.0717150  | 6.9102550  | 460879     | 0                                                           | 0                   | 0             | 0              | 0           |
| zamora    | mx      | Lerma - Chapala                                    | 10                | -102.2666670 | 19.9833330 | 124922     | 0                                                           | 0                   | 0             | 1              | 1           |
| zanjan    | ir      | Caspian Highlands                                  | 0                 | 48.4787000   | 36.6736000 | 357489     | 0                                                           | 0                   | 0             | 0              | 0           |

Table S2 Cities and freshwater reptiles

| City         | Country | Freshwater Ecoregions of the World (FEOW) Region | Regional richness | Longitude    | Latitude   | Population | # of freshwater reptile species within 50 km of city centre |                     |               |                |             |
|--------------|---------|--------------------------------------------------|-------------------|--------------|------------|------------|-------------------------------------------------------------|---------------------|---------------|----------------|-------------|
|              |         |                                                  |                   |              |            |            | Lizard species                                              | Crocodilian species | Snake species | Turtle species | All species |
| zanzibar     | tz      | Coastal East Africa                              | 4                 | 39.1833333   | -6.1666667 | 403670     | 0                                                           | 0                   | 0             | 0              | 0           |
| zaoyang      | cn      | Lower Yangtze                                    | 4                 | 112.7541670  | 32.1272220 | 184509     | 0                                                           | 0                   | 0             | 0              | 0           |
| zaozhuang    | cn      | Lower Yangtze                                    | 4                 | 117.5541670  | 34.8647220 | 183665     | 0                                                           | 0                   | 0             | 0              | 0           |
| zapopan      | mx      | Rio Santiago                                     | 13                | -103.4000000 | 20.7166670 | 987555     | 0                                                           | 0                   | 0             | 3              | 3           |
| zaporizhzhya | ua      | Dnieper - South Bug                              | 2                 | 35.1903140   | 47.8228920 | 796213     | 0                                                           | 0                   | 0             | 0              | 0           |
| zaragoza     | es      | Eastern Iberia                                   | 13                | -0.8848610   | 41.6453100 | 635509     | 0                                                           | 0                   | 0             | 3              | 3           |
| zaria        | ng      | Lower Niger - Benue                              | 2                 | 7.7251760    | 11.1132360 | 975228     | 0                                                           | 0                   | 0             | 0              | 0           |
| zelenodolsk  | ru      | Volga - Ural                                     | 0                 | 48.5178370   | 55.8437600 | 101131     | 0                                                           | 0                   | 0             | 0              | 0           |
| zelenograd   | ru      | Volga - Ural                                     | 0                 | 37.2091670   | 56.0011110 | 228298     | 0                                                           | 0                   | 0             | 0              | 0           |
| zenica       | ba      | Dniester - Lower Danube                          | 3                 | 17.9063889   | 44.2013889 | 164422     | 0                                                           | 0                   | 0             | 0              | 0           |
| zhangdian    | cn      | Lower Huang He                                   | 0                 | 118.0633330  | 36.7905560 | 669770     | 0                                                           | 0                   | 0             | 0              | 0           |
| zhangjiakou  | cn      | Lower Huang He                                   | 0                 | 114.8794440  | 40.8100000 | 692602     | 0                                                           | 0                   | 0             | 0              | 0           |
| zhangzhou    | cn      | Coastal Fujian - Zeijang                         | 1                 | 117.6555560  | 24.5133330 | 589831     | 0                                                           | 0                   | 0             | 1              | 1           |
| zhanjiang    | cn      | Xi Yang                                          | 15                | 110.3427130  | 21.2814520 | 637790     | 0                                                           | 0                   | 0             | 0              | 0           |
| zhaocheng    | cn      | Lower Huang He                                   | 0                 | 120.3963890  | 37.3591670 | 100774     | 0                                                           | 0                   | 0             | 0              | 0           |
| zhaodong     | cn      | Songhua Jiang                                    | 0                 | 125.9833330  | 46.0833330 | 154406     | 0                                                           | 0                   | 0             | 0              | 0           |
| zhaoqing     | cn      | Xi Yang                                          | 15                | 112.4597220  | 23.0511570 | 361969     | 0                                                           | 0                   | 0             | 0              | 0           |
| zhaotong     | cn      | Middle Yangtze                                   | 1                 | 103.7166670  | 27.3166670 | 109400     | 0                                                           | 0                   | 0             | 0              | 0           |
| zhaoyang     | cn      | Lower Yangtze                                    | 4                 | 119.8341670  | 32.9391670 | 105918     | 0                                                           | 0                   | 0             | 0              | 0           |
| zhenjiang    | cn      | Lower Yangtze                                    | 4                 | 119.4341670  | 32.2091670 | 632552     | 0                                                           | 0                   | 0             | 0              | 0           |
| zhezkazgan   | kz      | Lower & Middle Syr Darya                         | 0                 | 67.7666670   | 47.7833330 | 104365     | 0                                                           | 0                   | 0             | 0              | 0           |
| zhicheng     | cn      | Middle Yangtze                                   | 1                 | 111.5047220  | 30.2955560 | 159383     | 0                                                           | 0                   | 0             | 0              | 0           |
| zhongshan    | cn      | Xi Yang                                          | 15                | 113.3823180  | 22.5205760 | 342306     | 0                                                           | 0                   | 0             | 0              | 0           |
| zhoucheng    | cn      | Xi Yang                                          | 15                | 102.5422220  | 24.3550000 | 103829     | 0                                                           | 0                   | 0             | 0              | 0           |
| zhoucun      | cn      | Lower Huang He                                   | 0                 | 117.8166670  | 36.8166670 | 122402     | 0                                                           | 0                   | 0             | 0              | 0           |

Table S2 Cities and freshwater reptiles

| City         | Country | Freshwater Ecoregions of the World (FEOW) Region | Regional richness | Longitude   | Latitude   | Population | # of freshwater reptile species within 50 km of city centre |                     |               |                |             |
|--------------|---------|--------------------------------------------------|-------------------|-------------|------------|------------|-------------------------------------------------------------|---------------------|---------------|----------------|-------------|
|              |         |                                                  |                   |             |            |            | Lizard species                                              | Crocodilian species | Snake species | Turtle species | All species |
| zhoukou      | cn      | Lower Yangtze                                    | 4                 | 114.6333330 | 33.6333330 | 377061     | 0                                                           | 0                   | 0             | 0              | 0           |
| zhucheng     | cn      | Lower Huang He                                   | 0                 | 119.3975000 | 35.9947220 | 109968     | 0                                                           | 0                   | 0             | 0              | 0           |
| zhuhai       | cn      | Xi Yang                                          | 15                | 113.5677780 | 22.2769440 | 501199     | 1                                                           | 0                   | 0             | 2              | 3           |
| zhuji        | cn      | Lower Yangtze                                    | 4                 | 120.2423330 | 29.7187650 | 110721     | 0                                                           | 0                   | 0             | 0              | 0           |
| zhukovskiy   | ru      | Volga - Ural                                     | 0                 | 38.1202780  | 55.5952780 | 101253     | 0                                                           | 0                   | 0             | 0              | 0           |
| zhumadian    | cn      | Lower Yangtze                                    | 4                 | 114.0294440 | 32.9794440 | 253536     | 0                                                           | 0                   | 0             | 0              | 0           |
| zhuozhou     | cn      | Lower Huang He                                   | 0                 | 115.9633330 | 39.4811110 | 116310     | 0                                                           | 0                   | 0             | 0              | 0           |
| zhuzhou      | cn      | Lower Yangtze                                    | 4                 | 113.1521370 | 27.6918680 | 709358     | 0                                                           | 0                   | 0             | 0              | 0           |
| zhytomyr     | ua      | Dnieper - South Bug                              | 2                 | 28.6766910  | 50.2648680 | 282190     | 0                                                           | 0                   | 0             | 0              | 0           |
| zielona gora | pl      | Central & Western Europe                         | 13                | 15.5057720  | 51.9393450 | 118433     | 0                                                           | 0                   | 0             | 1              | 1           |
| zigong       | cn      | Middle Yangtze                                   | 1                 | 104.7768870 | 29.3416220 | 689961     | 0                                                           | 0                   | 0             | 0              | 0           |
| ziguinchor   | sn      | Senegal - Gambia                                 | 4                 | -16.2719444 | 12.5833333 | 255391     | 0                                                           | 0                   | 0             | 0              | 0           |
| zinder       | ne      | Lake Chad                                        | 0                 | 8.9833333   | 13.8000000 | 191440     | 0                                                           | 0                   | 0             | 0              | 0           |
| zlatoust     | ru      | Volga - Ural                                     | 0                 | 59.6508330  | 55.1711110 | 191369     | 0                                                           | 0                   | 0             | 0              | 0           |
| zoetermeer   | nl      | Central & Western Europe                         | 13                | 4.5123150   | 52.0278030 | 114144     | 0                                                           | 0                   | 0             | 0              | 0           |
| zonguldak    | tr      | Northern Anatolia                                | 2                 | 31.7930530  | 41.4513920 | 100281     | 0                                                           | 0                   | 0             | 0              | 0           |
| zouxian      | cn      | Lower Yangtze                                    | 4                 | 116.9655560 | 35.4005560 | 190537     | 0                                                           | 0                   | 0             | 0              | 0           |
| zunyi        | cn      | Middle Yangtze                                   | 1                 | 106.8230560 | 27.5430560 | 466292     | 0                                                           | 0                   | 0             | 0              | 0           |
| zurich       | ch      | Central & Western Europe                         | 13                | 8.5500000   | 47.3666670 | 346185     | 0                                                           | 0                   | 0             | 0              | 0           |
| zuwarah      | ly      | Sahara                                           | 1                 | 12.0791667  | 32.9344444 | 180310     | 0                                                           | 0                   | 0             | 0              | 0           |
| zwolle       | nl      | Central & Western Europe                         | 13                | 6.0858220   | 52.5057510 | 114924     | 0                                                           | 0                   | 0             | 0              | 0           |

DRAFT
